# Supplementary material for: Cardiomyocyte-Specific Loss of Glutamyl-prolyl-tRNA Synthetase Leads to Disturbed Protein Homeostasis and Dilated Cardiomyopathy
Source: MDPI journal article supplement (doi:10.3390/cells13010035), 2023-12-22
Supplement: s1 [file s1]

## **Supplementary Information for**

# **Cardiomyocyte-specific Loss of Glutamyl-prolyl-tRNA Synthetase Leads to Disturbed Protein Homeostasis and Dilated Cardiomyopathy**

Jiangbin Wu, Jared Hollinger, Emily Bonanno, Feng Jiang, Peng Yao

Correspondence to Peng Yao

E-mail: [peng\\_yao@urmc.rochester.edu](mailto:peng_yao@urmc.rochester.edu)

### **This document file includes:**

Supplementary Figures 1 to [4](#)

Supplementary Tables 1 to 2

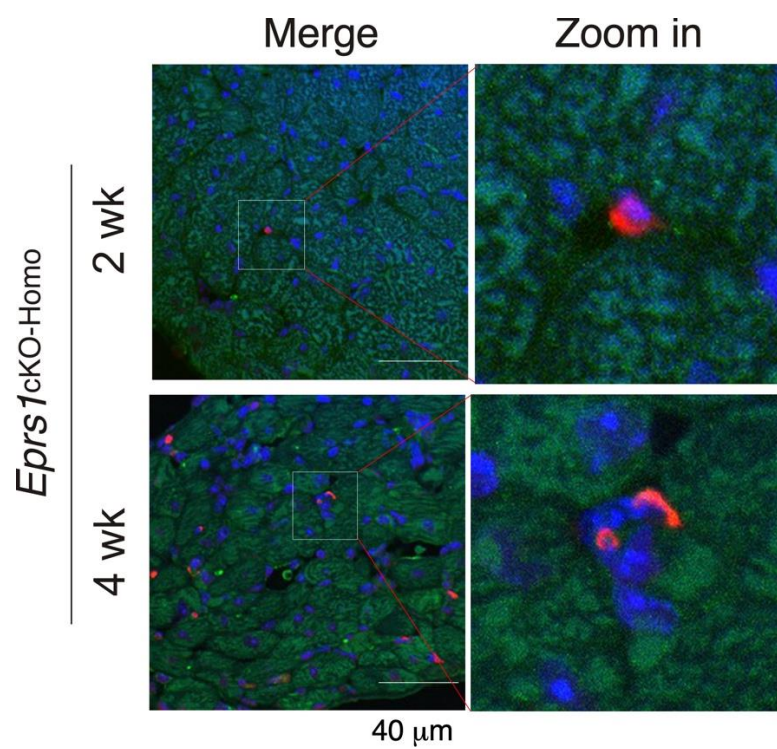

Figure S1. Zoom-in version of images containing positive TUNEL signals in Figure 2G.

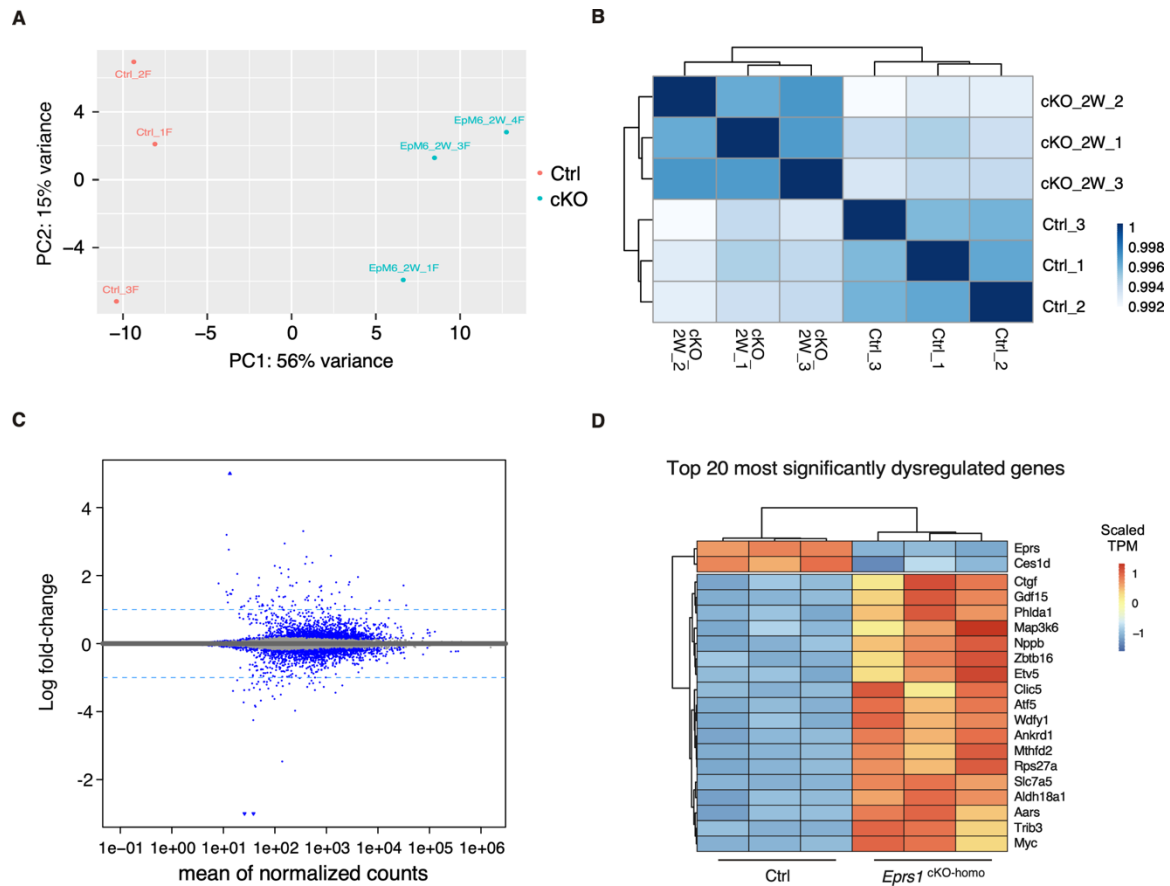

**Figure S2. RNA-seq of Cardiomyocyte-specific *Eprs1* knockout and control mouse hearts.**

- (A)** PCA analysis showing the distribution of the biological triplicates of RNA-seq for the control (Ctrl) and cardiomyocyte-specific EPRS cKO group.
- (B)** A heatmap showing the correlation among biological triplicates of RNA-seq. Pearson correlation was calculated and  $R^2$  is shown in the heatmap.
- (C)** An M (log ratio) versus A (mean average) plot (MA-plot) showing the distribution of differentially expressed genes. Genes with significant  $P$  values ( $P < 0.05$ ) are colored in blue.
- (D)** A heatmap showing the scaled TPM (transcript per million) of the top 20 most significantly dysregulated genes (sorted by  $P$  value) in all samples. Each row of the heatmap is scaled from -1 to 1.

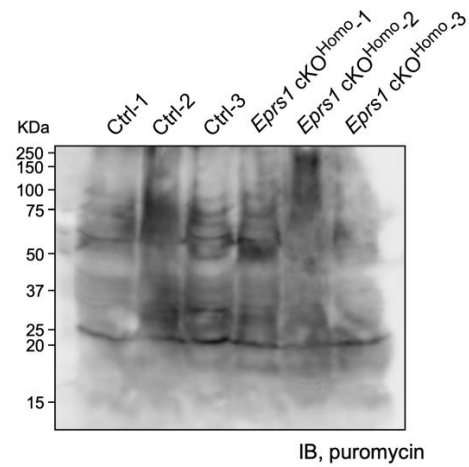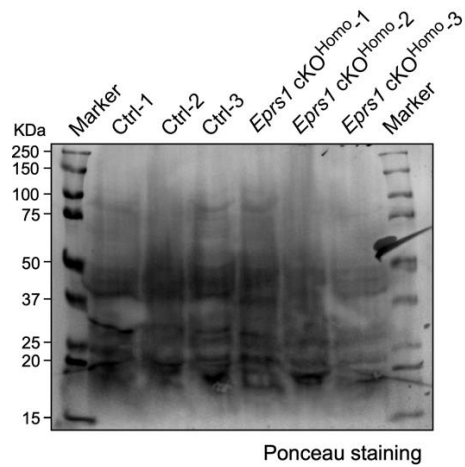

**Figure S3. Puromycin incorporation followed by immunoblot confirms mild decrease in global protein synthesis in hearts upon *Eprs1* conditional knockout in CMs.** (A) Western blot analysis of puromycin incorporation in control and *Eprs1* cKO hearts 2 weeks after tamoxifen injection. (B) Ponceau staining showing the loading for the total heart lysate protein samples.

**A**

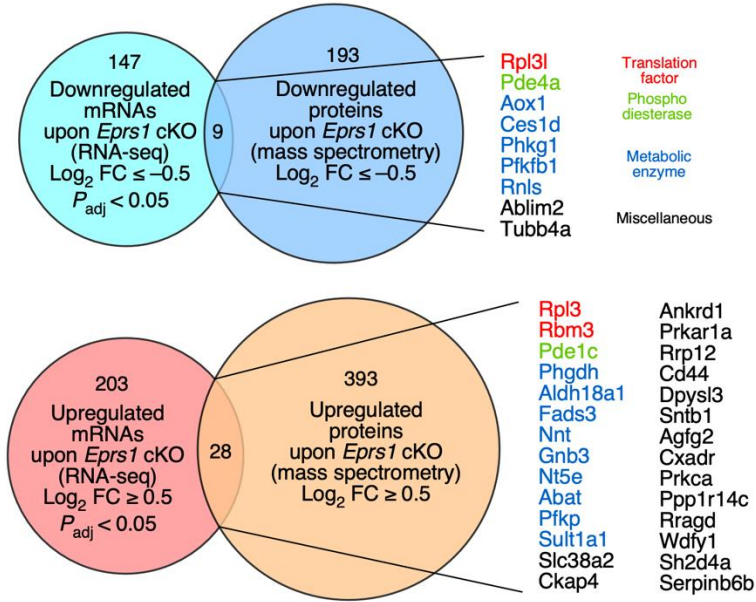

**B**

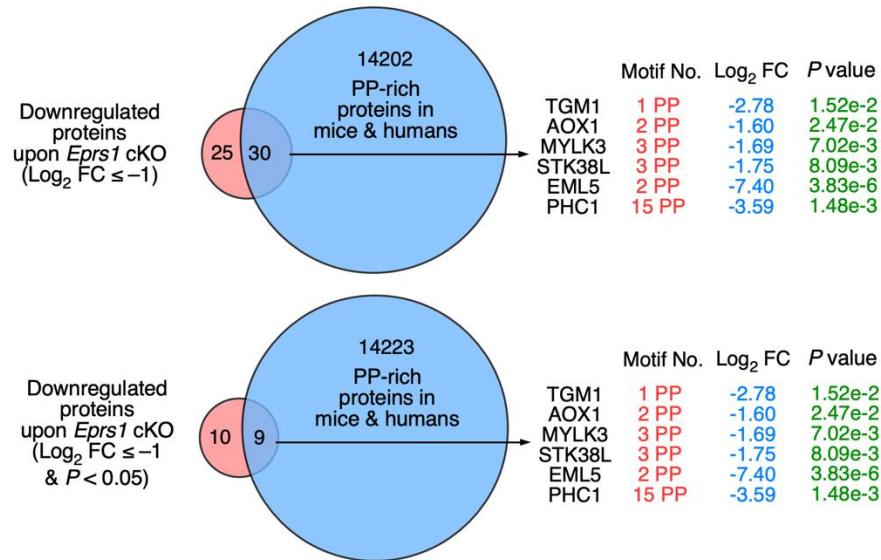

**C**

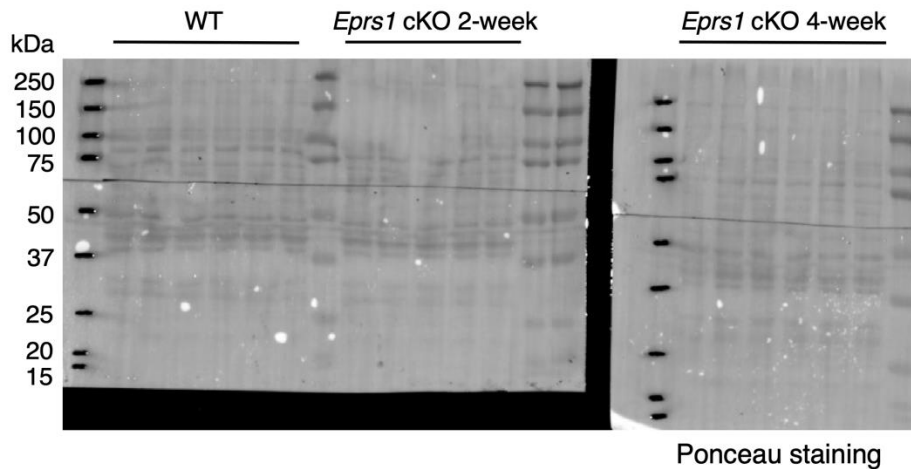

**Figure S4. (A)** Venn diagrams showing the overlapped genes between dysregulated mRNAs and proteins based on RNA-seq and mass spectrometry analysis in hearts samples from control and cKO hearts in mice at 2 weeks post-tamoxifen injections. **(B)** Reanalysis of Venn diagram showing downregulated proteins containing Pro-Pro dipeptidyl motifs in *Eprs1* cKO hearts using two more stringent cut-offs. **(C)** Representative ponceau staining images to indicate equal loading of the total heart lysate proteins for western blot of TGM1.

**Table S1.** Differentially expressed genes in *Eprs1* cKO hearts compared to control hearts at the early stage identified by RNA-Seq. Gene expression changes of ribosome protein-coding mRNAs are highlighted. Gene Ontology analysis data is shown.

**Table S2.** Differentially expressed proteins in *Eprs1* cKO hearts compared to control hearts at the early stage were identified by quantitative mass spectrometry analysis. Gene Ontology analysis data is shown. A pro-Pro dipeptidyl motif-bearing protein list is included.
