# Supplementary material for: Cardiomyocyte-Specific Loss of Glutamyl-prolyl-tRNA Synthetase Leads to Disturbed Protein Homeostasis and Dilated Cardiomyopathy
Source: Cells. 2023 Dec 22;13(1):35. doi: 10.3390/cells13010035 (PMC10778562; doi:10.3390/cells13010035)
Supplement: Supplementary file 1 [file cells-13-00035-s001.zip › Supplementary Table 1.xlsx]

## Sheet: cKO vs Ctrl_coding
	baseMean	log2FoldChange	lfcSE	stat	pvalue	padj
Ankrd1	31326.6	1.71732	0.0903128	19.0152	1.28e-80	1.84e-76
Slc7a5	534.169	2.39229	0.126552	18.9036	1.07e-79	7.68e-76
Atf5	2699.32	1.74188	0.0947945	18.3754	2.07e-75	9.95e-72
Mthfd2	355.149	3.32963	0.193964	17.1662	4.75e-66	1.71e-62
Eprs	1501.01	-1.45443	0.0858613	-16.9393	2.31e-64	6.66e-61
Nppb	4094.53	1.97227	0.120748	16.3338	5.67e-60	1.36e-56
Rps27a	1787.68	1.52063	0.100051	15.1985	3.62e-52	7.45e-49
Trib3	411.033	2.5767	0.177374	14.5269	8.18e-48	1.48e-44
Wdfy1	470.158	1.84486	0.139427	13.2317	5.76e-40	9.23e-37
Zbtb16	2806.91	1.83017	0.14188	12.8994	4.54e-38	6.54e-35
Gdf15	154.475	2.98364	0.243304	12.263	1.43e-34	1.88e-31
Ctgf	3097.68	1.38989	0.116751	11.9048	1.12e-32	1.34e-29
Etv5	796.938	1.7156	0.144393	11.8814	1.48e-32	1.64e-29
Aldh18a1	451.648	1.42288	0.124927	11.3897	4.7e-30	4.85e-27
Aars	2279.77	1.01158	0.0889867	11.3678	6.05e-30	5.82e-27
Slc38a2	5885.85	0.909931	0.0824605	11.0347	2.6e-28	2.34e-25
Myc	183.087	2.2223	0.204112	10.8876	1.32e-27	1.12e-24
Sars	1743.68	0.851614	0.0814669	10.4535	1.41e-25	1.13e-22
Phlda1	418.355	1.3802	0.134824	10.2371	1.35e-24	1.03e-21
Iars	1757.09	0.767771	0.0765493	10.0297	1.13e-23	8.14e-21
Map3k6	744.284	1.68936	0.168588	10.0206	1.24e-23	8.5e-21
Clic5	7173.26	1.06467	0.10681	9.96782	2.11e-23	1.38e-20
Hfe2	4175.91	-0.860642	0.0868115	-9.91392	3.62e-23	2.27e-20
Odc1	1846.77	0.84053	0.0857468	9.80246	1.1e-22	6.6e-20
Ces1d	2034.99	-1.25793	0.129021	-9.74979	1.85e-22	1.07e-19
Atf4	2254.29	1.12706	0.115738	9.73798	2.08e-22	1.15e-19
Rpl3	4665.55	0.754584	0.0785315	9.60868	7.35e-22	3.93e-19
Cnksr1	197.595	1.7502	0.184455	9.48851	2.34e-21	1.21e-18
Cebpd	698.718	1.4116	0.15019	9.39875	5.52e-21	2.75e-18
3632451O06Rik	246.323	-2.0214	0.216319	-9.34453	9.23e-21	4.44e-18
Myom2	35377.7	1.15027	0.125224	9.18571	4.09e-20	1.9e-17
Ano10	887.481	-1.30514	0.14252	-9.15762	5.31e-20	2.39e-17
Slc38a1	834.195	1.03427	0.115142	8.98263	2.64e-19	1.16e-16
Xdh	2780.98	0.736423	0.0820456	8.97578	2.81e-19	1.19e-16
Asns	125.147	2.29098	0.256663	8.92605	4.41e-19	1.82e-16
Yars	948.732	0.798286	0.0911033	8.76243		7.66e-16
Prkar1a	11673.9	0.61336	0.0705221	8.69741	3.4e-18	1.29e-15
Xpot	1298.52	0.74316	0.0854395	8.69809	3.38e-18	1.29e-15
Nt5e	604.394	1.31415	0.153924	8.53764	1.37e-17	5.07e-15
Art5	424.359	-1.31056	0.154412	-8.48743	2.11e-17	7.62e-15
Cebpg	879.498	0.965621	0.114118	8.46158	2.64e-17	9.28e-15
Slc3a2	1326.31	0.809302	0.0971405	8.33125	8e-17	2.75e-14
Tsc22d3	3542.08	1.04942	0.126185	8.3165	9.06e-17	3.04e-14
Pacsin2	5363.52	0.619575	0.0745328	8.31278	9.35e-17	3.07e-14
Gars	1810.96	0.632998	0.0763804	8.28745	1.16e-16	3.71e-14
Lipo2	38.3437	-5.46568	0.665626	-8.21134	2.19e-16	6.86e-14
Tmbim1	1892.03	0.686169	0.0851254	8.06068	7.59e-16	2.33e-13
Fuca2	6016.64	0.746852	0.0932829	8.00631	1.18e-15	3.52e-13
Tob1	1581.72	0.780613	0.097517	8.00489	1.2e-15	3.52e-13
Fam46b	99.2713	2.36154	0.295525	7.991	1.34e-15	3.86e-13
C130080G10Rik	659.979	-0.854383	0.107882	-7.91964	2.38e-15	6.69e-13
Sh2d4a	387.774	1.33279	0.168321	7.91816	2.41e-15	6.69e-13
Gal3st3	453.201	-0.985441	0.124586	-7.90972	2.58e-15	7.02e-13
Serpinb6b	1184.7	0.847687	0.108165	7.83695	4.62e-15	1.23e-12
Rrp12	824.51	1.31159	0.167801	7.81635	5.44e-15	1.43e-12
Aplnr	1521.5	-0.926326	0.118942	-7.78803	6.81e-15	1.75e-12
Ddit3	727.549	1.1745	0.151516	7.75169	9.07e-15	2.29e-12
Azin1	2096.39	0.589359	0.0767339	7.68056	1.58e-14	3.94e-12
Lars	1351.61	0.712779	0.0929103	7.67169	1.7e-14	4.15e-12
Kcnv2	130.148	-1.55766	0.207677	-7.50038	6.36e-14	1.53e-11
Eif3c	3653.95	0.621847	0.0831217	7.48115	7.37e-14	1.74e-11
Phgdh	112.724	1.70366	0.227897	7.47557	7.69e-14	1.79e-11
Nfkbia	1092.11	0.91521	0.122563	7.46726	8.19e-14	1.87e-11
Mhrt	936.005	-0.751296	0.101168	-7.42623	1.12e-13	2.52e-11
Gramd1b	1147.42	0.731387	0.0989498	7.3915	1.45e-13	3.22e-11
Eif2s2	1492.73	0.589271	0.0800428	7.36195	1.81e-13	3.96e-11
Ldb3	27783	0.507601	0.0693735	7.31694	2.54e-13	5.46e-11
Perp	3861.75	0.709131	0.0972035	7.29532	2.98e-13	6.32e-11
Nmrk2	220.449	1.76443	0.243392	7.24936	4.19e-13	8.76e-11
Tbc1d10c	98.0735	-1.69549	0.234147	-7.24116	4.45e-13	9.17e-11
Cars	506.72	0.837684	0.116004	7.2212	5.15e-13	1.05e-10
Phkg1	512.932	-1.13432	0.157145	-7.21828	5.26e-13	1.05e-10
Enc1	399.431	1.02208	0.14207	7.1942	6.28e-13	1.24e-10
Gm10435	1467.04	-0.702315	0.0977044	-7.18817	6.57e-13	1.28e-10
Armc2	467.33	-1.22557	0.170707	-7.17938	7e-13	1.35e-10
Scgb1c1	183.071	2.03921	0.284371	7.17096	7.45e-13	1.41e-10
Mir208b	520.191	-0.881303	0.122936	-7.16877	7.57e-13	1.42e-10
Igfbp5	3545.99	-0.613234	0.0857616	-7.15045	8.65e-13	1.6e-10
Cited4	624.981	-0.869834	0.121724	-7.14594	8.94e-13	1.63e-10
Ccnd2	3279.59	0.748019	0.105024	7.12237	1.06e-12	1.91e-10
Pfkp	1675.39	0.650401	0.0915311	7.1058	1.2e-12	2.13e-10
Sult1a1	642.926	1.11762	0.157958	7.07547	1.49e-12	2.62e-10
Ybx2	561.465	-0.919181	0.130545	-7.04109	1.91e-12	3.32e-10
Map7d1	9220.85	-0.511252	0.0731801	-6.98622	2.82e-12	4.85e-10
Asb14	1545.59	-0.618586	0.0899735	-6.87521	6.19e-12	1.04e-09
Myoz2	13661.2	0.597862	0.0869523	6.87574	6.17e-12	1.04e-09
Pla2g16	2919.64	0.5963	0.0867873	6.87083	6.38e-12	1.06e-09
Maob	800.614	-0.809628	0.118235	-6.8476	7.51e-12	1.23e-09
Tnfrsf12a	1049.67	1.09171	0.159684	6.83668	8.11e-12	1.31e-09
Nudt4	4920.92	-0.750509	0.110407	-6.79764	1.06e-11	1.7e-09
Pde3a	2227.35	0.54092	0.079647	6.79147	1.11e-11	1.76e-09
Akap5	90.1497	-1.62348	0.239853	-6.76866	1.3e-11	2.04e-09
Glul	8381.61	0.562349	0.0832101	6.75818	1.4e-11	2.17e-09
Amotl2	2221.02	0.601266	0.0893739	6.72754	1.73e-11	2.65e-09
Hrc	15078.8	-0.597245	0.0890652	-6.70571	2e-11	3.04e-09
Ttll11	146.422	1.42935	0.213414	6.69753	2.12e-11	3.19e-09
Art1	3572.04	-0.654551	0.0981069	-6.67181	2.53e-11	3.76e-09
Nnt	12682.8	0.551747	0.0828065	6.66309	2.68e-11	3.95e-09
2210407C18Rik	138.617	-3.64314	0.547876	-6.64956	2.94e-11	4.28e-09
Igfbp3	1351.96	0.714005	0.107398	6.64822	2.97e-11	4.28e-09
Slc8a1	2998.68	0.593404	0.0893411	6.64201	3.09e-11	4.42e-09
Spry1	944.022	0.603751	0.0909735	6.63656	3.21e-11	4.54e-09
Arrdc2	439.313	1.33204	0.200958	6.62842	3.39e-11	4.75e-09
9030617O03Rik	1072.69	-0.747948	0.113052	-6.61597	3.69e-11	5.12e-09
Bri3	1654	0.563034	0.0851578	6.61166	3.8e-11	5.22e-09
Itga7	4625.42	-0.517681	0.0785112	-6.59373	4.29e-11	5.84e-09
Per1	2680.65	0.635436	0.0965765	6.57961	4.72e-11	6.36e-09
Zfp622	978.867	0.691951	0.105345	6.56839	5.09e-11	6.79e-09
Dyrk1b	514.967	-0.824643	0.12572	-6.55935	5.4e-11	7.15e-09
Dlgap4	2247.32	0.590397	0.090167	6.54781	5.84e-11	7.66e-09
Tcta	875.144	-0.628454	0.0960309	-6.54429	5.98e-11	7.77e-09
Psat1	120.465	1.4545	0.223621	6.50433	7.8e-11	1.01e-08
Itgb6	256.031	-0.995667	0.154461	-6.44609	1.15e-10	1.47e-08
Kcnj3	972.078	-1.04726	0.162663	-6.43821	1.21e-10	1.53e-08
Eef1a1	24122.5	0.485848	0.0757091	6.4173	1.39e-10	1.74e-08
Zfp36	838.147	0.94084	0.147357	6.38475	1.72e-10	2.14e-08
Atp1b1	6533.25	0.485381	0.0762087	6.36911	1.9e-10	2.34e-08
Mfap5	945.648	0.645141	0.101561	6.35225	2.12e-10	2.59e-08
Asb18	440.109	-0.732342	0.115357	-6.34851	2.17e-10	2.64e-08
Slc19a2	346.965	0.943175	0.148691	6.34321	2.25e-10	2.71e-08
Entpd5	3898.87	-0.61977	0.0981289	-6.31588	2.69e-10	3.2e-08
Klf6	1740.26	0.614812	0.0975512	6.30246	2.93e-10	3.46e-08
Ckap4	1021.42	0.647606	0.103324	6.26774	3.66e-10	4.3e-08
Pde4a	1797.51	-0.592554	0.0945973	-6.26397	3.75e-10	4.37e-08
Nop58	455.239	0.846754	0.135381	6.2546	3.99e-10	4.6e-08
Tbx20	3302.89	0.485747	0.0777983	6.24368	4.27e-10	4.89e-08
Irf2bp2	1909.08	0.755733	0.121181	6.2364	4.48e-10	5.09e-08
Csrp3	21584	0.616067	0.0989242	6.22766	4.73e-10	5.34e-08
Slc16a6	281.704	0.900514	0.14469	6.22375	4.85e-10	5.43e-08
Picalm	3877.43	0.620482	0.0998633	6.21332	5.19e-10	5.76e-08
Irs1	365.169	0.834433	0.134367	6.2101	5.29e-10	5.83e-08
Gja1	9006.7	-0.385758	0.0621638	-6.20551	5.45e-10	5.96e-08
Rnf144b	800.212	1.09921	0.177381	6.19687	5.76e-10	6.25e-08
Fads3	1829.82	0.516136	0.083323	6.1944	5.85e-10	6.3e-08
Insr	3412.41	0.441787	0.0714484	6.18331	6.28e-10	6.71e-08
Lrrc32	498.685	-0.796074	0.129091	-6.16676	6.97e-10	7.39e-08
6030419C18Rik	569.185	-0.661784	0.1082	-6.11628	9.58e-10	1.01e-07
Murc	1969.05	0.607141	0.0993624	6.11037	9.94e-10	1.04e-07
Fam65b	248.378	1.20303	0.197001	6.10671	1.02e-09	1.06e-07
Pydc3	25.7291	-6.65526	1.09263	-6.09105	1.12e-09	1.16e-07
Slc43a3	2477.64	0.62287	0.10238	6.0839	1.17e-09	1.2e-07
Ror1	236.246	1.03105	0.169664	6.07698	1.22e-09	1.24e-07
Sgk1	1680.82	0.769748	0.126827	6.06927	1.28e-09	1.3e-07
Gadd45g	299.526	0.961224	0.158974	6.04643	1.48e-09	1.48e-07
Uck2	1192.51	0.788249	0.131015	6.01648	1.78e-09	1.77e-07
Csrnp1	382.8	0.837464	0.139887	5.9867	2.14e-09	2.12e-07
Whrn	922.421	-0.751859	0.125792	-5.977	2.27e-09	2.23e-07
Bmp7	49.3823	2.05505	0.344571	5.96409	2.46e-09	2.4e-07
Ptp4a1	1428.77	0.554906	0.0931952	5.95424	2.61e-09	2.53e-07
Adgrg1	1767.29	0.727899	0.122747	5.93008	3.03e-09	2.91e-07
Slc17a7	303.114	-1.07885	0.182105	-5.92436	3.14e-09	3e-07
Pkig	3332.71	-0.521716	0.0881472	-5.91869	3.25e-09	3.08e-07
8430408G22Rik	1264.29	1.54808	0.261688	5.91575	3.3e-09	3.11e-07
Snta1	2372.03	0.558882	0.0946779	5.90298	3.57e-09	3.34e-07
Ablim2	500.516	-0.779439	0.132348	-5.8893	3.88e-09	3.61e-07
Prlr	108.121	-1.31734	0.223986	-5.88136	4.07e-09	3.76e-07
Pdia6	1816.92	-0.513409	0.0874218	-5.87278	4.29e-09	3.94e-07
Midn	3091.77	0.647606	0.110355	5.86837	4.4e-09	4.02e-07
Cxadr	905.071	0.572898	0.0977421	5.86132	4.59e-09	4.17e-07
Rgma	1328.08	-0.685656	0.117059	-5.85738	4.7e-09	4.24e-07
Gpc1	10480.3	-0.486963	0.0831684	-5.85514	4.77e-09	4.24e-07
Pkia	3189.46	-0.432946	0.073934	-5.85585	4.75e-09	4.24e-07
Nacc2	820.821	-0.600416	0.102713	-5.84559	5.05e-09	4.47e-07
Tmem100	451.909	0.993995	0.170167	5.84129	5.18e-09	4.56e-07
Cdkn1a	1221.1	2.75147	0.471459	5.83608	5.34e-09	4.59e-07
Creg1	2268.44	-0.464662	0.0796176	-5.83618	5.34e-09	4.59e-07
Lmod2	14011.1	0.565315	0.0968178	5.83896	5.25e-09	4.59e-07
Zfp697	538.968	0.960687	0.164614	5.83599	5.35e-09	4.59e-07
Ano8	909.272	-0.534724	0.0917327	-5.82916	5.57e-09	4.76e-07
Nt5c2	818.426	0.611948	0.105022	5.82688	5.65e-09	4.79e-07
Fam134b	4284.62	0.548677	0.0942737	5.82004	5.88e-09	4.96e-07
Dnaja3	3654.01	0.450149	0.0773756	5.81772	5.97e-09	5e-07
Sorbs1	4663.61	0.570207	0.0980433	5.81587	6.03e-09	5.03e-07
Prdx1	3886.84	-0.427644	0.07358	-5.81196	6.17e-09	5.12e-07
Crhr2	657.881	-0.684383	0.11818	-5.79103	7e-09	5.77e-07
Cyb5r1	853.913	0.753354	0.130362	5.77895	7.52e-09	6.16e-07
Ppp1r14c	3660.11	0.565503	0.0981973	5.75885	8.47e-09	6.9e-07
Sesn2	223.844	1.32861	0.232429	5.71619	1.09e-08	8.83e-07
Xirp1	7021.94	0.455991	0.0798053	5.71379	1.1e-08	8.9e-07
Dhdh	411.435	-0.776943	0.136147	-5.70665	1.15e-08	9.23e-07
Jade2	779.347	0.810434	0.142302	5.69515	1.23e-08	9.82e-07
Lmo7	10491.4	0.462629	0.0812455	5.69421	1.24e-08	9.82e-07
Tubb4b	5436.46	0.487874	0.0856924	5.69332	1.25e-08	9.82e-07
Ctsl	3333.81	0.418721	0.0739005	5.66601	1.46e-08	1.15e-06
Ndrg4	10208.8	0.513776	0.090922	5.65074	1.6e-08	1.25e-06
Lgalsl	887.169	0.596205	0.105706	5.64022	1.7e-08	1.32e-06
Cebpb	1823.32	0.61071	0.10833	5.63747	1.73e-08	1.33e-06
Slc1a4	142.842	1.06993	0.189843	5.63587	1.74e-08	1.33e-06
Trp53inp1	516.886	0.960389	0.170417	5.63554	1.75e-08	1.33e-06
Mrpl14	869.627	-0.523609	0.0929376	-5.63399	1.76e-08	1.34e-06
Oplah	1340.9	-0.601195	0.107036	-5.61674	1.95e-08	1.47e-06
Ndufb9	6984.1	-0.49848	0.0889229	-5.60575	2.07e-08	1.56e-06
Slc25a5	6240.01	0.556523	0.099394	5.59917	2.15e-08	1.61e-06
Nrap	15423.7	0.512001	0.0918484	5.57442	2.48e-08	1.85e-06
Josd2	1439.71	-0.539931	0.097188	-5.55553	2.77e-08	2.05e-06
Psme4	4780.53	-0.528618	0.0955155	-5.53437	3.12e-08	2.3e-06
Klf9	3386.48	0.369084	0.0668037	5.52491	3.3e-08	2.41e-06
Gm37829	951.687	-0.576892	0.104821	-5.50362	3.72e-08	2.71e-06
Maml3	202.357	1.01145	0.184027	5.49622	3.88e-08	2.8e-06
RP23-234F23.1	38.0458	-2.42617	0.441379	-5.49679	3.87e-08	2.8e-06
Pkp2	3637.23	0.468905	0.0854669	5.48639	4.1e-08	2.94e-06
Phlda3	605.782	0.718277	0.131141	5.47715	4.32e-08	3.09e-06
Nars	1767.77	0.429853	0.0785296	5.47377	4.41e-08	3.12e-06
Sorbs3	1326.32	0.471546	0.0861347	5.47451	4.39e-08	3.12e-06
Hk1	5725.01	0.428325	0.0783409	5.46745	4.57e-08	3.2e-06
Ift81	698.302	-0.825079	0.150914	-5.46722	4.57e-08	3.2e-06
Tmem56	53.3829	-1.80622	0.331031	-5.45634	4.86e-08	3.39e-06
Parm1	3984.84	0.643935	0.118035	5.45548	4.88e-08	3.39e-06
Ctla4	42.1102	-2.00235	0.367094	-5.45459	4.91e-08	3.39e-06
As3mt	817.992	-0.646279	0.118559	-5.45112	5.01e-08	3.44e-06
Htatsf1	1437.67	-0.527765	0.0969721	-5.44244	5.26e-08	3.59e-06
Creld1	859.853	-0.499058	0.0917177	-5.44124	5.29e-08	3.6e-06
Lrp8	47.3613	1.85179	0.340813	5.43346	5.53e-08	3.74e-06
Slc26a6	345.858	-0.698706	0.129564	-5.39277	6.94e-08	4.68e-06
Pycr1	87.3457	1.38868	0.258309	5.37603	7.61e-08	5.11e-06
Ftl1	2820.47	-0.423902	0.078867	-5.3749	7.66e-08	5.12e-06
Adamtsl2	1078.78	0.840252	0.156642	5.36414	8.13e-08	5.41e-06
Fitm1	1559.33	-0.605718	0.112965	-5.36198	8.23e-08	5.42e-06
Nes	1336.53	-0.645567	0.120388	-5.3624	8.21e-08	5.42e-06
Klf2	2321.05	0.656893	0.123106	5.33598	9.5e-08	6.23e-06
Ndfip1	2338.29	0.429572	0.0808982	5.31004	1.1e-07	7.15e-06
Sox7	820.548	-0.506868	0.0954707	-5.30915	1.1e-07	7.16e-06
Stk39	2409.22	0.399111	0.0753199	5.29889	1.17e-07	7.54e-06
Rbfox1	815.001	-0.698686	0.131897	-5.2972	1.18e-07	7.57e-06
Cmya5	9589.05	-0.538798	0.101752	-5.29522	1.19e-07	7.62e-06
Cd44	412.304	0.967517	0.182932	5.28894	1.23e-07	7.85e-06
Tbl1x	1350.39	0.570061	0.107844	5.286	1.25e-07	7.95e-06
Agap1	1325.22	0.626304	0.118554	5.28286	1.27e-07	8.05e-06
Pabpc4	10748.3	0.594865	0.112705	5.27809	1.31e-07	8.22e-06
Ccdc85a	452.374	0.624365	0.118365	5.27491	1.33e-07	8.33e-06
Ddit4	1542.54	1.94971	0.369881	5.27118	1.36e-07	8.47e-06
Acot2	2710.7	0.714238	0.135995	5.25195	1.5e-07	9.36e-06
Ctage5	1251.3	-0.476038	0.0907529	-5.24543	1.56e-07	9.65e-06
Csf1	1474.17	-0.500689	0.0956208	-5.23619	1.64e-07	1.01e-05
Dmpk	14000.6	-0.389932	0.0746667	-5.2223	1.77e-07	1.08e-05
Atp13a3	1002.73	0.510448	0.0978263	5.21791	1.81e-07	1.11e-05
Ctf1	139.218	-1.05801	0.203046	-5.21068	1.88e-07	1.15e-05
Svil	6584.17	0.39128	0.0751305	5.208	1.91e-07	1.16e-05
Ptprf	312.634	0.876874	0.168587	5.2013	1.98e-07	1.19e-05
Ntn1	3572.55	0.472495	0.0909079	5.19751	2.02e-07	1.21e-05
Adra1b	975.037	-0.719638	0.138526	-5.19498	2.05e-07	1.23e-05
Rhot2	1516.73	-0.422827	0.0818099	-5.1684	2.36e-07	1.41e-05
Cxcl12	5036.14	-0.449073	0.0870243	-5.16032	2.47e-07	1.46e-05
Slc10a6	108.306	1.70649	0.330677	5.16061	2.46e-07	1.46e-05
Rbm3	1053.84	0.555879	0.107795	5.1568	2.51e-07	1.48e-05
Lgr4	833.793	0.50059	0.0971418	5.15318	2.56e-07	1.5e-05
Dact3	811.121	-0.576771	0.111943	-5.15235	2.57e-07	1.5e-05
Pdp1	863.024	-0.537867	0.104485	-5.1478	2.64e-07	1.53e-05
Kcnh2	3250.72	-0.629635	0.122386	-5.14467	2.68e-07	1.55e-05
Lgmn	1778.19	-0.432417	0.0840545	-5.14449	2.68e-07	1.55e-05
Tnnt2	127182	0.372541	0.072426	5.14374	2.69e-07	1.55e-05
Tuba1c	677.506	0.718049	0.139714	5.13941	2.76e-07	1.58e-05
Ndufaf4	1144.21	-0.48039	0.093728	-5.12536	2.97e-07	1.69e-05
Fsd2	4143.13	-0.341354	0.0669009	-5.10238	3.35e-07	1.9e-05
Tcf15	803.987	-0.833789	0.163651	-5.09492	3.49e-07	1.97e-05
Sorbs2	9485.64	0.482013	0.0947506	5.08717	3.63e-07	2.05e-05
Kcnj2	839.391	-0.701236	0.137893	-5.08536	3.67e-07	2.06e-05
Nampt	3369.98	-0.412092	0.0811337	-5.07918	3.79e-07	2.12e-05
Abra	571.28	0.823182	0.162569	5.06359	4.11e-07	2.29e-05
Klf15	1673.11	0.555954	0.109801	5.06328	4.12e-07	2.29e-05
Tsc22d4	4293.75	-0.455697	0.0900225	-5.06204	4.15e-07	2.29e-05
Synj2	1331.32	-0.443803	0.0877111	-5.05983	4.2e-07	2.31e-05
Hacd1	947.729	0.606233	0.120089	5.04819	4.46e-07	2.45e-05
Tgfb2	473.366	0.600721	0.119164	5.04113	4.63e-07	2.53e-05
Coq10a	4596.14	-0.452887	0.0900185	-5.03104	4.88e-07	2.66e-05
Ammecr1	422.135	0.77957	0.155727	5.00601	5.56e-07	3.01e-05
Shisa4	168.705	0.922161	0.185197	4.97935	6.38e-07	3.45e-05
Extl1	999.967	0.478845	0.0961824	4.97851	6.41e-07	3.45e-05
Wnk4	597.366	-0.601554	0.120931	-4.97437	6.55e-07	3.51e-05
Rbfox2	3056.47	0.366558	0.0737064	4.97323	6.58e-07	3.52e-05
Il15	479.173	-0.735722	0.148199	-4.96443	6.89e-07	3.67e-05
Rpl3l	4160.19	-0.656904	0.132561	-4.95547	7.22e-07	3.83e-05
Celf2	1542.53	0.413363	0.0835915	4.94503	7.61e-07	4.02e-05
Nrep	584.41	-0.743627	0.150572	-4.93867	7.87e-07	4.14e-05
Upp1	157.935	1.51835	0.308142	4.92744	8.33e-07	4.37e-05
Cystm1	973.311	0.4513	0.0916427	4.92456	8.45e-07	4.42e-05
Plcd3	481.643	0.747059	0.151752	4.92289	8.53e-07	4.44e-05
Itga8	219.041	-0.974188	0.19812	-4.91717	8.78e-07	4.56e-05
Trim35	3194.28	0.357265	0.0727444	4.91124	9.05e-07	4.68e-05
Pfkfb1	190.415	-1.2944	0.263828	-4.90624	9.28e-07	4.78e-05
Acsm5	41.0029	-2.00416	0.408662	-4.90419	9.38e-07	4.82e-05
Smtn	5665.11	-0.389918	0.0796283	-4.89672	9.74e-07	4.99e-05
Kxd1	1017.5	-0.529273	0.108203	-4.89147	1e-06	5.1e-05
Prkca	700.211	0.558457	0.114271	4.88712	1.02e-06	5.2e-05
Myl3	101181	0.350266	0.0717784	4.87982	1.06e-06	5.37e-05
Alox5	212.428	-1.08884	0.223193	-4.87847	1.07e-06	5.39e-05
Ncl	4213.56	0.350704	0.0720124	4.87005	1.12e-06	5.61e-05
Cmss1	753.087	-0.515323	0.105889	-4.86665	1.14e-06	5.69e-05
Slc40a1	381.481	-0.958111	0.197356	-4.85474	1.21e-06	6.02e-05
Stbd1	376.972	0.853651	0.176218	4.84429	1.27e-06	6.32e-05
Dbi	925.75	-0.437754	0.0903972	-4.84256	1.28e-06	6.35e-05
Myom1	29177.5	0.341607	0.0708607	4.82082	1.43e-06	7.06e-05
Arfgef1	1614.05	-0.382519	0.0794035	-4.8174	1.45e-06	7.11e-05
Colq	183.565	0.981956	0.203822	4.81772	1.45e-06	7.11e-05
Sord	2892.61	-0.399175	0.0828614	-4.81739	1.45e-06	7.11e-05
Mycn	135.572	-1.19841	0.249239	-4.80825	1.52e-06	7.42e-05
Aldh1l2	249.064	0.726365	0.151209	4.80371	1.56e-06	7.57e-05
Klhdc7a	215.199	1.22569	0.2558	4.79159	1.65e-06	8.01e-05
Orai3	507.04	-0.547985	0.114393	-4.79039	1.66e-06	8.03e-05
Itgb5	3682.03	0.370504	0.0773784	4.78821	1.68e-06	8.09e-05
Col6a6	207.523	-0.882219	0.184311	-4.78659	1.7e-06	8.13e-05
Gm17281	253.121	-0.70619	0.147893	-4.77501	1.8e-06	8.58e-05
Hecw2	393.56	0.651372	0.136526	4.77104	1.83e-06	8.73e-05
2023-09-02	3147.57	0.384636	0.0806672	4.76818	1.86e-06	8.82e-05
Rgcc	885.318	0.696394	0.14614	4.76525	1.89e-06	8.92e-05
Hic1	792.477	-0.722636	0.151773	-4.76131	1.92e-06	9.07e-05
Dnajc7	1689.4	0.390374	0.0822343	4.74709	2.06e-06	9.7e-05
Uckl1os	51.1435	-1.49576	0.315456	-4.74159	2.12e-06	9.93e-05
Wwc2	1680.65	0.38354	0.0809178	4.73987	2.14e-06	9.95e-05
Zfp422	511.996	0.553081	0.116675	4.74034	2.13e-06	9.95e-05
Cdc42ep4	676.553	0.606966	0.128144	4.73658	2.17e-06	0.00010082
Celsr1	302.598	0.660146	0.139465	4.73343	2.21e-06	0.000101813
mt-Tl1	810.948	-0.490041	0.103531	-4.7333	2.21e-06	0.000101813
Rtn2	1752.08	-0.419485	0.0886429	-4.73231	2.22e-06	0.000101985
Foxo3	3125.72	0.440354	0.0931288	4.72844	2.26e-06	0.000103617
Frem2	402.68	0.732807	0.155028	4.72692	2.28e-06	0.000104064
Fkbp4	7546.9	-0.341269	0.0723185	-4.71898	2.37e-06	0.000107329
Nr4a1	762.433	0.538088	0.114033	4.71872	2.37e-06	0.000107329
Poldip2	2176.36	-0.375186	0.0795059	-4.71897	2.37e-06	0.000107329
Mical3	2334.63	0.351382	0.0744922	4.71703	2.39e-06	0.000107883
Ezr	1812.66	0.439136	0.0933924	4.70205	2.58e-06	0.00011575
Bcl6b	633.492	-0.477519	0.101626	-4.69879	2.62e-06	0.000117248
Yeats4	347.707	-0.62622	0.133468	-4.69192	2.71e-06	0.00012088
Mdga1	405.933	-0.60049	0.128067	-4.68886	2.75e-06	0.000122321
Pknox2	257.847	-0.6661	0.142264	-4.68213	2.84e-06	0.000126022
Gtpbp4	735.505	0.462743	0.0989684	4.67566	2.93e-06	0.00012966
Mlf1	2088.91	-0.43789	0.0938168	-4.6675	3.05e-06	0.000134504
Ehd4	13831.5	0.535892	0.115036	4.65847	3.19e-06	0.000140111
Nudcd3	2100.2	0.370806	0.0797628	4.64885	3.34e-06	0.00014636
Ticam1	381.689	0.582497	0.125326	4.64787	3.35e-06	0.000146371
Tob2	2449.27	0.548471	0.118012	4.64758	3.36e-06	0.000146371
Gm17029	90.8535	1.24893	0.26951	4.63406	3.59e-06	0.000155799
Actn2	48647.9	0.315586	0.0684833	4.60822	4.06e-06	0.000174535
D330025C20Rik	189.168	0.881264	0.191188	4.60942	4.04e-06	0.000174535
Lama5	5179.38	-0.531157	0.115268	-4.60802	4.07e-06	0.000174535
Pld1	316.805	0.647235	0.140441	4.60858	4.05e-06	0.000174535
Pnrc2	1130.95	0.401566	0.0871891	4.60569	4.11e-06	0.000175977
Pex6	1504.95	-0.410974	0.0892791	-4.60325	4.16e-06	0.00017753
Rp1	74.6519	-1.47439	0.321366	-4.58788	4.48e-06	0.000190542
Agfg2	459.133	0.587586	0.128098	4.58699	4.5e-06	0.000190798
Cep63	619.557	-0.549147	0.119933	-4.57879	4.68e-06	0.000197852
Mybpc3	92140.7	0.429944	0.0939237	4.57759	4.7e-06	0.000198407
Dnajc28	807.871	-0.418489	0.0915079	-4.57326	4.8e-06	0.000201962
Slc29a2	309.097	-0.754684	0.165472	-4.56079	5.1e-06	0.000213714
Agfg1	1043.21	0.459009	0.100679	4.55912	5.14e-06	0.000214796
Dusp4	92.7585	1.392	0.305607	4.55488	5.24e-06	0.000218544
Naa40	534.701	-0.548261	0.120482	-4.55057	5.35e-06	0.000222425
Lrrc58	1447.62	0.454211	0.0998471	4.54906	5.39e-06	0.000223376
Oxld1	397.574	-0.626468	0.137746	-4.54799	5.42e-06	0.000223876
Mrgprh	76.9269	-1.16295	0.255764	-4.54696	5.44e-06	0.000224332
Cpq	771.742	-0.437415	0.0962145	-4.54625	5.46e-06	0.000224446
Timp4	814.103	1.44045	0.317218	4.54087	5.6e-06	0.0002296
Abca5	217.598	0.747817	0.164911	4.53468	5.77e-06	0.000235361
Aox1	597.763	-0.613988	0.135405	-4.53444	5.78e-06	0.000235361
Angpt1	531.405	-0.711581	0.157012	-4.53201	5.84e-06	0.000237105
Dusp27	1215.56	0.526211	0.116133	4.5311	5.87e-06	0.000237105
Tmem82	647.202	0.622577	0.137384	4.53167	5.85e-06	0.000237105
Shroom3	2127.8	0.37116	0.0820004	4.52631	6e-06	0.000241862
Adprhl1	9350.04	0.447689	0.0989652	4.52371	6.08e-06	0.00024418
Lrrc2	5990.84	0.409962	0.0906507	4.52244	6.11e-06	0.000244966
Xirp2	8238.33	0.631367	0.139708	4.5192	6.21e-06	0.000248055
Timm13	802.997	-0.452734	0.100215	-4.51764	6.25e-06	0.000249199
Ppia	3640.8	0.30793	0.0681766	4.51665	6.28e-06	0.000249676
Skp1a	2626.01	-0.337367	0.0747371	-4.51405	6.36e-06	0.000252068
mt-Co2	28631.6	0.426538	0.0945282	4.51228	6.41e-06	0.000253479
Smyd2	1242.95	0.393143	0.0873168	4.50249	6.72e-06	0.000264715
Calr3	168.864	-0.876168	0.194824	-4.49722	6.88e-06	0.000269547
Rpl19	4284.27	0.297908	0.0662472	4.49691	6.89e-06	0.000269547
Rragd	2714.08	0.505836	0.112466	4.49769	6.87e-06	0.000269547
Rasa3	825.172	0.4261	0.0948273	4.49343	7.01e-06	0.000273256
Rps13	2961.84	0.313294	0.069841	4.48582	7.26e-06	0.00028243
Pitpnm1	682.259	-0.452149	0.100852	-4.4833	7.35e-06	0.000285015
Ppil1	507.313	-0.515929	0.115155	-4.4803	7.45e-06	0.000288286
Pfkl	2903.38	-0.342449	0.0764841	-4.47738	7.56e-06	0.00029147
Mid1ip1	2515.63	-0.536085	0.119845	-4.47314	7.71e-06	0.000296518
Rpl4	9778.55	0.280346	0.0627318	4.46896	7.86e-06	0.000301562
Noct	1205.85	0.482133	0.108129	4.45886	8.24e-06	0.000315297
Arhgap18	384.48	-0.525744	0.118026	-4.45446	8.41e-06	0.000320486
Zfr	1666.71	0.377397	0.084728	4.45422	8.42e-06	0.000320486
Klf13	1945.77	0.3789	0.0851056	4.45211	8.5e-06	0.00032195
Kremen1	4280.18	0.371805	0.0835024	4.45263	8.48e-06	0.00032195
Vmn2r3	13.3862	5.88092	1.32238	4.44723	8.7e-06	0.00032849
Clcn1	141.926	-1.40946	0.317028	-4.44585	8.75e-06	0.000329752
Irx3	1228.56	0.615914	0.138567	4.44489	8.79e-06	0.00033036
Gcnt1	124.203	1.22652	0.276554	4.43501	9.21e-06	0.000344302
Saraf	5955.94	0.288609	0.0650771	4.43488	9.21e-06	0.000344302
Trak2	4215.36	-0.369969	0.0834442	-4.43373	9.26e-06	0.000345239
Speg	8168.69	-0.419565	0.0946461	-4.43298	9.29e-06	0.000345547
Kiz	754.745	-0.67264	0.152339	-4.41543	1.01e-05	0.000373847
Ppp6r3	2463.5	0.330551	0.0749112	4.41256	1.02e-05	0.000377864
mt-Tl2	563.685	-0.575628	0.130486	-4.41142	1.03e-05	0.000378888
Abca12	99.1547	-1.09237	0.248109	-4.40278	1.07e-05	0.000393303
Fam179a	153.516	-0.927412	0.210727	-4.401	1.08e-05	0.000395526
Fyttd1	1999.68	0.356986	0.0811752	4.39773	1.09e-05	0.000400523
Slc25a4	91996.6	0.338943	0.0771799	4.39159	1.13e-05	0.000410959
Nudt6	180.955	-0.767165	0.174721	-4.39079	1.13e-05	0.000411427
Nov	172.463	-1.09951	0.250484	-4.38956	1.14e-05	0.000412731
Grb10	2157.61	0.421074	0.0960621	4.38336	1.17e-05	0.000423586
Neurl3	176.414	-0.793383	0.181143	-4.37987	1.19e-05	0.00042934
Cdh2	7492.99	0.30612	0.0699205	4.37812	1.2e-05	0.000431734
Ifngr1	1467.29	0.348135	0.0796593	4.3703	1.24e-05	0.000446355
Pde1c	1479.48	1.32272	0.302733	4.36925	1.25e-05	0.000447392
Spry4	450.653	0.735325	0.168448	4.3653	1.27e-05	0.000454422
Dpysl3	1763.27	0.512111	0.117411	4.36169	1.29e-05	0.000460844
Abcg2	659.098	0.462397	0.106074	4.35919	1.31e-05	0.000465003
Fhl1	3670.62	0.409087	0.0939592	4.35388	1.34e-05	0.000474065
Zbtb20	3703	-0.319453	0.0733674	-4.35415	1.34e-05	0.000474065
Foxo6	203.979	-1.04785	0.240831	-4.35099	1.36e-05	0.000479186
Anxa7	2076.89	0.337211	0.0776474	4.34285	1.41e-05	0.000496075
Lsmem2	266.422	-0.617461	0.142292	-4.33941	1.43e-05	0.000502689
Cpt2	4530.92	-0.415227	0.0958008	-4.33427	1.46e-05	0.000513314
Acyp2	642.322	-0.477542	0.11032	-4.3287	1.5e-05	0.000525188
Plppr2	179.384	-0.879708	0.203459	-4.32377	1.53e-05	0.000535776
Cux2	569.207	-0.471557	0.109189	-4.31873	1.57e-05	0.000546829
Enah	3214.27	0.440287	0.102067	4.31371	1.61e-05	0.000558058
Mxd4	2388.06	0.438905	0.10181	4.31102	1.63e-05	0.000563529
Tmod4	192.168	-0.760063	0.176361	-4.30971	1.63e-05	0.000565525
2900076A07Rik	423.226	-0.522467	0.121311	-4.30685	1.66e-05	0.000571497
Atp8a2	104.852	0.949759	0.220856	4.30035	1.71e-05	0.000584336
Col28a1	49.039	1.5825	0.367955	4.3008	1.7e-05	0.000584336
Hmgn5	305.028	-0.568133	0.132083	-4.30133	1.7e-05	0.000584336
Glce	377.47	0.633572	0.147541	4.29421	1.75e-05	0.000599317
Prr29	70.0247	-1.28294	0.298833	-4.29316	1.76e-05	0.000600732
Mgst1	355.72	-0.639595	0.149083	-4.29019	1.79e-05	0.000607171
Myh7	16886.3	1.4342	0.334332	4.28975	1.79e-05	0.000607171
Rpl12	3116.59	0.301016	0.0702213	4.28667	1.81e-05	0.000614199
Etfb	862.511	-0.451998	0.105475	-4.28535	1.82e-05	0.000614972
Ubxn1	1364.21	-0.399563	0.0932309	-4.28573	1.82e-05	0.000614972
Cdh20	59.0843	1.26567	0.295695	4.28033	1.87e-05	0.000627528
Abhd8	603.904	-0.473038	0.110759	-4.27086	1.95e-05	0.000653255
Acta2	3294.83	-0.523665	0.122697	-4.26794	1.97e-05	0.000660332
Rpl3-ps1	238.745	0.638249	0.149603	4.26629	1.99e-05	0.000663705
Kcna5	701.247	0.763669	0.179391	4.25701	2.07e-05	0.00069024
Otulin	492.618	0.494985	0.116298	4.25618	2.08e-05	0.000691211
Ttc7	497.734	-0.533553	0.125481	-4.25206	2.12e-05	0.000702435
Kcnq1	1105.49	-0.364668	0.0859146	-4.24454	2.19e-05	0.000723494
Rmnd1	707.698	-0.521631	0.122898	-4.24441	2.19e-05	0.000723494
Ptgfr	188.194	-1.09168	0.257264	-4.24341	2.2e-05	0.000725097
Arhgap27	629.413	0.560475	0.132262	4.2376	2.26e-05	0.000742386
Crybb1	24.7196	-1.97548	0.466246	-4.23699	2.27e-05	0.000742717
Sec31b	538.306	-0.577026	0.136353	-4.23187	2.32e-05	0.000758135
Canx	5349.35	-0.311304	0.0736007	-4.22964	2.34e-05	0.000763957
Asb10	1791.07	-0.45334	0.107262	-4.22648	2.37e-05	0.000772988
Fzd4	1825.12	0.469744	0.111359	4.21829	2.46e-05	0.000799811
Slc45a3	149.106	1.12719	0.267333	4.21641	2.48e-05	0.000804681
Aebp1	651.693	-0.477956	0.113406	-4.21457	2.5e-05	0.000809459
Mars	1176.03	0.362684	0.0860888	4.2129	2.52e-05	0.000813635
N4bp2l1	96.5407	1.00944	0.239968	4.20657	2.59e-05	0.00083304
Tcap	32824	-0.47557	0.113044	-4.20694	2.59e-05	0.00083304
Lrrc20	699.632	-0.631306	0.150097	-4.20598	2.6e-05	0.000833359
Eda2r	137.725	1.2173	0.289475	4.20519	2.61e-05	0.000834412
Samd4	1966.06	0.396926	0.0944058	4.20447	2.62e-05	0.000835236
Tet3	790.609	0.411799	0.097968	4.20341	2.63e-05	0.000837303
Myl12a	11312.2	0.323612	0.0770434	4.20039	2.66e-05	0.000846675
Gnl2	754.51	0.423635	0.100923	4.19761	2.7e-05	0.000855249
Jund	1404.44	-0.415408	0.0990463	-4.19407	2.74e-05	0.000866792
Ckmt2	28532.2	-0.292748	0.0699064	-4.18771	2.82e-05	0.000889491
Cox19	839.576	0.461112	0.110197	4.18442	2.86e-05	0.000900507
Mpv17	1107.12	0.479841	0.114699	4.18347	2.87e-05	0.000902313
Hspb8	11777.9	0.382251	0.0915565	4.17503	2.98e-05	0.000934369
Npas2	79.1443	1.18638	0.285115	4.16107	3.17e-05	0.000991241
Nceh1	4813.09	0.293744	0.0706294	4.15895	3.2e-05	0.000998302
Mtss1	912.071	0.401595	0.0966131	4.15674	3.23e-05	0.00100585
Hdlbp	10935.4	-0.327288	0.078879	-4.14924	3.34e-05	0.00103713
Il18bp	144.109	0.76217	0.183921	4.144	3.41e-05	0.00105882
Gm37795	71.8636	1.2909	0.311678	4.14175	3.45e-05	0.00106696
Carns1	954.221	-0.665364	0.160737	-4.13946	3.48e-05	0.00107325
Me1	2529.89	-0.36212	0.0874809	-4.13942	3.48e-05	0.00107325
B3galt2	116.486	-1.32786	0.320888	-4.1381	3.5e-05	0.00107716
Doc2g	2242.2	0.390048	0.0942795	4.13714	3.52e-05	0.00107936
Agtpbp1	1865.66	-0.432596	0.104594	-4.13597	3.53e-05	0.00108257
Faap100	558.124	-0.540646	0.130755	-4.1348	3.55e-05	0.00108579
Abcb8	1879.43	-0.466642	0.11299	-4.12993	3.63e-05	0.00110672
Slc38a3	2252.82	-0.38693	0.0937182	-4.12865	3.65e-05	0.00111054
Bach2	109.82	0.903676	0.218915	4.12798	3.66e-05	0.00111146
Galm	358.487	-0.564101	0.136696	-4.12669	3.68e-05	0.00111537
Efnb3	1800.44	-0.593849	0.143941	-4.12563	3.7e-05	0.00111814
Rufy4	46.3954	1.40505	0.34072	4.12376	3.73e-05	0.00112494
S1pr1	1801.23	0.54007	0.131113	4.11913	3.8e-05	0.00114535
Epn3	888.66	0.426031	0.103575	4.11328	3.9e-05	0.00117235
Myrfl	31.6877	-1.57124	0.382235	-4.11067	3.95e-05	0.00118323
Lamc2	198.024	0.787912	0.191784	4.10833	3.99e-05	0.0011928
Ptprs	2511.27	-0.308154	0.0750215	-4.10754	4e-05	0.00119439
Pink1	14450	-0.346562	0.0844371	-4.10438	4.05e-05	0.00120835
Tysnd1	679.044	-0.402671	0.0981555	-4.10238	4.09e-05	0.0012163
Trpm4	686.769	-0.438534	0.106965	-4.09981	4.13e-05	0.00122739
Tle2	428.574	-0.500997	0.122284	-4.097	4.19e-05	0.00123982
Adssl1	2620.93	-0.398761	0.0973548	-4.09596	4.2e-05	0.00124062
Tubb2a	564.565	0.61445	0.150016	4.0959	4.21e-05	0.00124062
Cited2	1077.64	0.382957	0.0935497	4.09362	4.25e-05	0.00125031
Lrp11	115.513	0.901331	0.220256	4.0922	4.27e-05	0.00125478
Phyhd1	136.637	0.888517	0.217143	4.09185	4.28e-05	0.00125478
Paqr9	2249.34	0.397957	0.097305	4.08979	4.32e-05	0.00126342
Purb	1564.54	0.355184	0.0869686	4.08405	4.43e-05	0.00129242
Ccdc91	534.719	-0.465822	0.114096	-4.08273	4.45e-05	0.00129716
Megf8	2044.19	-0.365851	0.0896222	-4.08214	4.46e-05	0.00129784
Amigo1	674.903	-0.427551	0.104818	-4.079	4.52e-05	0.00131226
Eif3d	848.102	0.436969	0.107136	4.07864	4.53e-05	0.00131226
Ier5l	293.009	-0.660962	0.162073	-4.07817	4.54e-05	0.00131226
Rpl18	4002.94	0.292113	0.0716382	4.07761	4.55e-05	0.00131281
Asb2	12725.2	-0.400987	0.0983768	-4.07603	4.58e-05	0.00131649
Foxo4	1359.3	-0.40186	0.0985844	-4.07631	4.58e-05	0.00131649
Tmem143	2188.53	-0.350316	0.0859888	-4.07397	4.62e-05	0.00132554
Aldh6a1	4117.17	-0.371633	0.0912496	-4.07271	4.65e-05	0.0013301
Emilin2	2561.67	0.464325	0.114053	4.07113	4.68e-05	0.00133125
Klf4	1150.79	0.617029	0.151558	4.07124	4.68e-05	0.00133125
Plekhm2	3157.38	-0.315161	0.0774099	-4.07132	4.67e-05	0.00133125
Alpk3	3701.52	-0.303408	0.0745665	-4.06896	4.72e-05	0.00133858
Bcl2l1	1204.51	1.22318	0.300619	4.06886	4.72e-05	0.00133858
Scand1	888.14	-0.42865	0.105359	-4.06847	4.73e-05	0.00133858
Slc6a9	89.9452	0.953467	0.234381	4.06801	4.74e-05	0.00133859
Mif4gd	664.934	-0.418983	0.103013	-4.06729	4.76e-05	0.00134014
Spta1	358.109	-0.600357	0.147715	-4.06429	4.82e-05	0.00135482
Maff	227.754	0.65212	0.160532	4.06225	4.86e-05	0.00136409
Uqcrb	3367.24	-0.31596	0.0777998	-4.0612	4.88e-05	0.00136756
Mtfp1	2292.04	-0.352853	0.0869722	-4.05708	4.97e-05	0.00138919
Clcnkb	62.1302	-1.30088	0.320978	-4.05287	5.06e-05	0.00141172
Ctsc	713.136	-0.45487	0.112256	-4.05208	5.08e-05	0.00141378
Cd38	384.906	-0.503516	0.124343	-4.04941	5.13e-05	0.00142723
Asb15	1581.32	-0.433177	0.107012	-4.04791	5.17e-05	0.00143088
Fam107a	262.179	2.07589	0.512788	4.04823	5.16e-05	0.00143088
Cyth3	1490.6	0.375549	0.0928028	4.04674	5.19e-05	0.00143529
Lum	2221.33	-0.462806	0.11456	-4.03985	5.35e-05	0.00147531
Pim3	3348.46	0.395126	0.0978742	4.03708	5.41e-05	0.00148995
Inppl1	4639.25	-0.326944	0.0811641	-4.02819	5.62e-05	0.00154447
Fam50a	426.093	0.461738	0.114718	4.02497	5.7e-05	0.00155929
Fam78a	1026.22	-0.580752	0.144273	-4.02537	5.69e-05	0.00155929
Gpr75	12.7331	3.19569	0.794038	4.02461	5.71e-05	0.00155929
Ddx21	1189.14	0.422331	0.105186	4.01508	5.94e-05	0.00162058
Gpihbp1	1490.33	0.45717	0.113917	4.0132	5.99e-05	0.00163044
Sprr1a	11.5326	3.69294	0.920545	4.01169	6.03e-05	0.00163779
Rhbdd1	432.039	0.518005	0.129168	4.01031	6.06e-05	0.00164429
RP24-486I4.3	50.0507	1.27637	0.318424	4.0084	6.11e-05	0.0016546
Pitpnc1	1534.06	-0.376989	0.0941338	-4.00483	6.21e-05	0.00167663
Mlxipl	905.216	-0.528668	0.132063	-4.00314	6.25e-05	0.00168548
Hsp90aa1	3100.47	0.483023	0.120991	3.99224	6.55e-05	0.00175925
Slc6a17	127.871	-0.820922	0.205636	-3.99211	6.55e-05	0.00175925
Gm28979	61.3349	-1.3123	0.328763	-3.99164	6.56e-05	0.00175949
Ggcx	597.358	-0.422087	0.10582	-3.98873	6.64e-05	0.00177553
Slc9a2	134.302	-0.948807	0.237887	-3.98848	6.65e-05	0.00177553
Zfp36l2	1350.85	-0.377746	0.0947166	-3.98817	6.66e-05	0.00177553
Scn4a	597.118	-1.60057	0.401455	-3.98691	6.69e-05	0.00178169
Sik3	2244.92	0.419374	0.105268	3.98388	6.78e-05	0.00180123
Gas6	4894.85	0.313016	0.0786598	3.97937	6.91e-05	0.00183179
Slc25a33	571.537	0.461974	0.116103	3.97901	6.92e-05	0.00183179
Prnp	3230.44	0.489797	0.123245	3.97417	7.06e-05	0.00186597
Col4a3bp	1214.05	0.334277	0.0841254	3.97356	7.08e-05	0.0018674
Aff1	1762.09	0.381551	0.0961655	3.96765	7.26e-05	0.00191077
Vcp	7417.4	-0.273395	0.0689284	-3.96636	7.3e-05	0.00191762
Rps6	5720.88	0.284817	0.0718854	3.9621	7.43e-05	0.00194865
Baiap2	235.324	0.773304	0.195324	3.95908	7.52e-05	0.00196987
Smim20	1148.12	-0.373442	0.0945085	-3.95141	7.77e-05	0.00203039
Rgs2	696.541	0.60223	0.152464	3.94998	7.82e-05	0.0020389
Adamts15	271.702	0.614524	0.155614	3.94904	7.85e-05	0.00204321
Zmat3	392.885	0.681248	0.172578	3.94747	7.9e-05	0.00205296
Cenpf	470.383	-0.778479	0.197246	-3.94673	7.92e-05	0.00205555
Hnrnpc	2543.85	0.296967	0.0752747	3.94511	7.98e-05	0.00206585
Dld	7205.32	-0.291536	0.0739253	-3.94366	8.02e-05	0.00207468
Rcan1	1552.22	0.532385	0.135113	3.94028	8.14e-05	0.00209745
Tnks	1229.22	0.34188	0.0867677	3.94018	8.14e-05	0.00209745
Fer1l5	124.485	-0.870723	0.221102	-3.9381	8.21e-05	0.0021082
Gm16576	159.655	0.721065	0.183087	3.93837	8.2e-05	0.0021082
Cidea	508.349	0.483412	0.122788	3.93697	8.25e-05	0.00211434
Fam43a	1081.19	-0.410563	0.104337	-3.93497	8.32e-05	0.0021245
Slc43a2	505.875	0.592299	0.150515	3.93516	8.31e-05	0.0021245
Gpr157	1797.59	-0.510095	0.129679	-3.93354	8.37e-05	0.00212969
Myrip	168.318	0.798722	0.203034	3.93394	8.36e-05	0.00212969
Lcp1	470.923	-0.637935	0.162269	-3.93133	8.45e-05	0.00214552
Dcakd	910.803	-0.371484	0.0946171	-3.92618	8.63e-05	0.00218045
Gck	215.395	-0.753676	0.191953	-3.92635	8.62e-05	0.00218045
Rnaseh2c	253.734	-0.563857	0.14359	-3.92686	8.61e-05	0.00218045
Plxnb2	4737.08	0.347994	0.0886673	3.92472	8.68e-05	0.00218991
Kif5b	3371.52	0.322915	0.0823591	3.92082	8.82e-05	0.00222175
Fam53b	926.793	-0.402046	0.102656	-3.91644	8.99e-05	0.00225854
Gm28661	9228.82	-0.43305	0.110664	-3.91321	9.11e-05	0.00228101
Snrk	2913.29	0.450986	0.115241	3.91343	9.1e-05	0.00228101
Sirt5	635.369	0.434031	0.110994	3.91039	9.21e-05	0.00230383
Fkbp5	792.695	1.83228	0.468716	3.90914	9.26e-05	0.00231175
Anxa5	2544.87	0.316159	0.0809621	3.90502	9.42e-05	0.00234745
Rab5a	1145.63	0.349748	0.0895812	3.90426	9.45e-05	0.00235083
Meox2	369.147	-0.51564	0.1321	-3.9034	9.48e-05	0.00235509
Hba-a2	39.0866	-1.52984	0.392448	-3.8982	9.69e-05	0.00240208
Sh3bp5	1301.4	0.45635	0.117083	3.89765	9.71e-05	0.0024034
Hspb1	5926.76	0.400924	0.1029	3.89626	9.77e-05	0.0024131
Flnc	16108.6	0.872757	0.224109	3.89434	9.85e-05	0.00242813
Rps18	4042.23	0.308121	0.0791622	3.89227	9.93e-05	0.0024365
Rps27	1741.01	0.296963	0.0762939	3.89236	9.93e-05	0.0024365
Sdha	27541.5	-0.312425	0.0802597	-3.89267	9.91e-05	0.0024365
Ablim1	10333.8	0.313583	0.0807685	3.88249	0.000103392	0.00253229
Kctd12b	387.452	-0.483788	0.124621	-3.88208	0.000103567	0.00253229
Cpeb1	730.485	0.455485	0.117454	3.87797	0.00010533	0.00257031
Zfp110	602.187	0.435944	0.112425	3.87763	0.000105478	0.00257031
Slc37a1	357.025	0.545989	0.140929	3.8742	0.000106977	0.00260244
Ms4a4a	43.3102	1.55911	0.402533	3.87324	0.000107399	0.0026083
Nf1	608.591	0.432668	0.111746	3.8719	0.000107991	0.00261829
Dtnbp1	1186.37	-0.340909	0.088087	-3.87015	0.000108771	0.00263276
Slc7a1	1632.66	0.36666	0.0948111	3.86727	0.000110059	0.00265949
Opn4	59.7654	-1.12439	0.291179	-3.86151	0.000112686	0.00271842
Arl8a	679.048	0.396018	0.102573	3.86083	0.000113005	0.00272154
Csnk1a1	5094.66	0.260111	0.0674377	3.85706	0.000114761	0.00275924
Tars	724.098	0.365427	0.0947995	3.85473	0.000115855	0.0027803
Wdr83	562.844	-0.475041	0.123247	-3.85438	0.000116023	0.0027803
Ifrd1	704.052	0.711261	0.184692	3.85107	0.000117601	0.00281345
Timp3	4939.39	0.35756	0.0928708	3.85008	0.000118081	0.00282025
Chac1	388.214	2.79071	0.724947	3.84954	0.000118341	0.00282036
Usp22	1163.47	0.333027	0.0865173	3.84926	0.000118476	0.00282036
Igf1r	894.188	0.353462	0.0918569	3.84797	0.000119102	0.00283058
Dnaaf3	242.247	-0.587041	0.153107	-3.83419	0.000125981	0.00298914
Icam2	493.519	-0.492397	0.128471	-3.83276	0.000126716	0.00300164
Mfap3l	266.028	-0.557012	0.145352	-3.83216	0.000127022	0.00300397
Scn10a	47.6497	-1.33335	0.348414	-3.82692	0.000129756	0.0030636
Tuft1	43.7669	1.65196	0.43188	3.82504	0.000130752	0.00308207
Atxn10	1874.16	0.332615	0.0869912	3.82355	0.000131546	0.00309574
Rpl10a	3467.82	0.256765	0.0672003	3.82089	0.000132973	0.00312421
Dcaf6	1418.53	-0.31607	0.0828163	-3.81653	0.000135344	0.00317476
Aifm1	1472.91	-0.349401	0.0916009	-3.81439	0.000136522	0.003192
Hpcal1	398.756	0.504717	0.13231	3.81465	0.000136374	0.003192
Ggnbp1	570.537	-0.485898	0.127543	-3.80968	0.000139146	0.00324284
Mrpl18	1044.37	-0.406463	0.106691	-3.80973	0.00013912	0.00324284
Mrpl2	1285.96	-0.308876	0.0811187	-3.8077	0.000140264	0.00326362
Cyp27a1	661.078	0.415072	0.109021	3.80727	0.000140509	0.00326406
Il6st	5351.38	0.342328	0.0899428	3.80606	0.000141196	0.00327476
Timm10	664.623	0.506875	0.133357	3.8009	0.00014417	0.00333836
Mrpl28	1483.94	-0.300496	0.079086	-3.79961	0.000144923	0.00335042
Syt12	64.9293	1.13102	0.298172	3.79317	0.000148734	0.00343302
Rpl8	7462.02	0.254437	0.0670928	3.79231	0.000149251	0.00343945
Slc4a8	113.875	0.913241	0.240853	3.79169	0.000149624	0.00344253
Ric8b	781.457	-0.362176	0.0956539	-3.78632	0.000152894	0.00351219
Dapp1	183.247	-0.704383	0.186105	-3.78488	0.000153785	0.00352703
C1qc	808.271	-0.498245	0.13167	-3.78403	0.00015431	0.00353345
Lox	148.984	0.872575	0.23072	3.78196	0.0001556	0.00355734
Hba-a1	551.423	-1.39544	0.369265	-3.77898	0.000157473	0.00358313
Sac3d1	214.541	-0.691596	0.18301	-3.77901	0.000157453	0.00358313
Slc4a2	925.754	-0.338803	0.0896461	-3.77934	0.000157244	0.00358313
Rrp9	550.196	0.420328	0.111479	3.77048	0.000162933	0.00370154
Atic	820.468	0.398659	0.10579	3.76841	0.000164292	0.00372654
Kansl3	1752.13	-0.331547	0.0880497	-3.76545	0.000166247	0.00376496
Arid5b	339.074	0.510063	0.135496	3.7644	0.00016695	0.00377496
Ank3	1387.34	0.320866	0.0852476	3.76393	0.000167263	0.00377611
Atp5f1	15079.6	-0.261654	0.0695423	-3.76251	0.000168216	0.00379169
Myl2	101361	0.252529	0.0671404	3.76121	0.000169094	0.00380554
Abhd18	921.598	-0.452823	0.120472	-3.75873	0.000170775	0.00382546
Mmab	698.353	-0.406863	0.10824	-3.75889	0.000170668	0.00382546
Pkd1	2669.41	0.288182	0.0766667	3.7589	0.000170664	0.00382546
Amfr	4381.4	0.316313	0.0841808	3.75754	0.000171591	0.00383641
Cyp1b1	206.587	0.871793	0.23203	3.75724	0.000171795	0.00383641
Pycard	106.93	-0.815866	0.217379	-3.7532	0.00017459	0.00389279
Fmo2	969.592	0.570728	0.152091	3.75255	0.000175048	0.00389698
Dennd4b	1765.11	-0.339605	0.0906109	-3.74795	0.000178288	0.00396299
Mt1	2432.51	0.536542	0.143296	3.74428	0.000180908	0.00401505
Jph1	529.556	-0.456331	0.121969	-3.74136	0.000183029	0.00404966
Rpl28	3674.59	0.247505	0.0661495	3.74161	0.000182848	0.00404966
2310022B05Rik	2336.13	0.28929	0.077343	3.74035	0.000183765	0.00405971
Hax1	432.05	0.425576	0.113811	3.73933	0.000184508	0.00406989
Sema6c	338.057	-0.80815	0.216271	-3.73675	0.000186416	0.00410571
Tcf23	56.083	1.3271	0.355215	3.73606	0.00018693	0.00411074
Tmem94	3421.32	-0.328323	0.0879091	-3.7348	0.000187867	0.00412507
Golga4	6626.87	-0.303364	0.0812847	-3.73212	0.000189873	0.00416278
Idh1	1023.47	-0.404874	0.108512	-3.73115	0.000190609	0.00417257
Smpx	3439.18	0.367128	0.0985364	3.72581	0.000194692	0.0042555
Bcl2	245.221	0.672529	0.18054	3.72509	0.000195244	0.00426111
Mcf2l	1914.24	0.539073	0.144747	3.72423	0.000195909	0.00426917
Cacng6	44.761	-1.43432	0.385196	-3.72362	0.00019639	0.00427318
Fam46a	424.659	0.621227	0.166927	3.72155	0.000198003	0.00430179
Fgf18	103.581	0.808099	0.217439	3.71644	0.000202048	0.00438307
Irs2	575.089	0.543306	0.146232	3.71538	0.000202899	0.00439493
Hif3a	57.2203	1.38719	0.373508	3.71396	0.000204043	0.00441307
Cyb561	506.867	0.415869	0.111993	3.71334	0.000204543	0.00441727
Cdc37l1	1360.12	0.328107	0.0883827	3.71234	0.000205349	0.00442805
mt-Rnr2	75181	-0.361771	0.0975112	-3.71004	0.000207225	0.00446184
Adamts7	886.152	-0.463203	0.124929	-3.70773	0.000209123	0.00449599
Kcnd2	618.387	-0.570909	0.154026	-3.70658	0.000210074	0.00450927
Rpl27a	4036.83	0.282551	0.0762368	3.70623	0.000210366	0.00450927
Smtnl2	628.388	-0.440874	0.119033	-3.7038	0.000212397	0.00454604
Prr33	420.85	-0.489079	0.132077	-3.703	0.000213068	0.00455365
Col4a6	104.961	-0.932453	0.251869	-3.70214	0.00021379	0.00456233
Fdft1	694.129	-0.572655	0.154712	-3.70142	0.000214392	0.00456842
Eno1	4373.39	0.267035	0.0721537	3.70091	0.000214826	0.00457092
Jak1	3258.84	-0.268783	0.0726732	-3.69852	0.000216859	0.0046006
Nme1	193.246	0.690595	0.186712	3.69871	0.000216696	0.0046006
2810474O19Rik	588.464	0.686446	0.185635	3.69782	0.000217461	0.00460659
Col11a2	141.633	-0.759418	0.205443	-3.69649	0.000218599	0.00461714
Nol11	567.716	0.444009	0.120111	3.69664	0.00021847	0.00461714
Gpt	718.103	-0.42195	0.114168	-3.69587	0.000219134	0.00462167
Gm19461	241.298	-0.691324	0.18738	-3.68943	0.000224759	0.00473338
Gm6086	147.18	-0.769615	0.208653	-3.6885	0.000225581	0.00474377
Agap2	415.063	0.610717	0.165647	3.68686	0.000227037	0.00475684
Rpl6	5920.45	0.286211	0.0776336	3.68669	0.000227191	0.00475684
Tspyl4	303.05	0.609983	0.165433	3.68719	0.000226744	0.00475684
C1qa	926.424	-0.424344	0.115226	-3.68272	0.000230756	0.00480963
Gm43146	69.0399	1.17342	0.318684	3.68208	0.000231343	0.00480963
Gsta4	749.744	-0.407512	0.110687	-3.68167	0.000231713	0.00480963
Serbp1	5194.74	0.255168	0.0692866	3.68279	0.000230693	0.00480963
St6galnac6	1906.95	-0.307788	0.0835972	-3.6818	0.000231595	0.00480963
Thumpd3	326.365	0.499935	0.135776	3.68206	0.000231354	0.00480963
Rpl9	3920.5	0.264176	0.0717786	3.68042	0.000232846	0.0048262
Npepps	2298.23	-0.303991	0.0826101	-3.67983	0.000233387	0.00483047
Prkrir	2388.34	0.299308	0.0814444	3.675	0.00023785	0.00491579
Clip1	5154.19	0.281619	0.0767435	3.66961	0.000242921	0.00500853
Ets2	3062.49	-0.313118	0.0853352	-3.66927	0.000243241	0.00500853
Hnmt	121.513	-0.824532	0.224721	-3.66913	0.000243379	0.00500853
Slc26a10	1050.56	-0.426453	0.116245	-3.66856	0.000243921	0.00501253
Nos2	337.421	-0.467064	0.127471	-3.66407	0.000248238	0.005094
Ap1s2	489.18	-0.470948	0.12864	-3.66097	0.000251266	0.00514882
Nifk	344.786	0.565409	0.154541	3.65864	0.000253557	0.00518084
Tbc1d4	1976.54	-0.51427	0.140577	-3.65829	0.000253906	0.00518084
Tjp2	811.067	0.349792	0.0955997	3.65892	0.00025328	0.00518084
Btg2	876.749	0.437513	0.119663	3.65622	0.000255959	0.00520112
Cdadc1	620.753	-0.429136	0.117372	-3.6562	0.000255982	0.00520112
Slc44a2	2719.57	-0.362249	0.0990669	-3.65661	0.000255576	0.00520112
Tmprss13	25.3634	-1.66153	0.454656	-3.65448	0.000257706	0.00522879
Prkab1	822.987	-0.349542	0.095681	-3.6532	0.00025899	0.00524745
Rap1gap	419.144	-0.493923	0.135216	-3.65283	0.000259362	0.00524763
Ppp1r13l	1103.95	-0.468196	0.128238	-3.65101	0.000261214	0.00527769
Hbb-bt	69.1882	-1.46743	0.402052	-3.64985	0.00026239	0.00529404
Mapk4	133.992	0.868419	0.237961	3.64942	0.000262835	0.0052956
Ramp2	1056.55	0.374304	0.102737	3.64334	0.000269119	0.00541466
Klhl30	1302.66	-0.360959	0.0991125	-3.64191	0.000270623	0.00543734
Apbb1	1873.87	-0.308702	0.0848679	-3.63744	0.000275362	0.00551718
Mob1b	973.188	0.405386	0.111445	3.63755	0.000275245	0.00551718
Plpp7	770.947	-0.373875	0.102881	-3.63406	0.000278991	0.00558214
Six5	531.082	-0.470948	0.129617	-3.63339	0.000279723	0.00558904
Idh3a	10518.7	-0.230915	0.0635708	-3.63241	0.000280785	0.00560249
Sorl1	473.349	0.569116	0.156746	3.63081	0.000282535	0.00562963
Qsox1	1218.5	0.429239	0.118261	3.6296	0.000283863	0.00564829
Tmem150a	668.084	-0.388463	0.107061	-3.62842	0.000285162	0.00566631
Acss1	7682.3	-0.336001	0.0927698	-3.62188	0.000292471	0.00579558
Rpl30	2397.32	0.277643	0.0766543	3.62202	0.00029231	0.00579558
Rps25	3511.9	0.245146	0.0677296	3.61949	0.000295185	0.00584134
Mreg	502.16	-0.515611	0.142469	-3.6191	0.00029563	0.00584214
Kctd3	461.312	0.427809	0.118314	3.6159	0.000299311	0.0059068
Npnt	81.8234	-1.33234	0.368598	-3.6146	0.000300807	0.00592011
Phldb2	658.869	0.393444	0.108841	3.61484	0.000300532	0.00592011
Fbxw4	462.964	-0.461864	0.127895	-3.61126	0.000304709	0.00598059
Slc4a3	6922.79	-0.313186	0.0867201	-3.61146	0.000304478	0.00598059
E230013L22Rik	312.315	0.68674	0.190244	3.60979	0.000306448	0.00600655
Sumo3	899.494	-0.32755	0.090794	-3.60761	0.000309029	0.00604892
Amacr	579.186	-0.401573	0.111353	-3.60632	0.000310565	0.00607075
Rad23a	1060.91	-0.307717	0.0853425	-3.60568	0.000311341	0.00607768
Syk	880.706	0.355201	0.0987478	3.59705	0.000321842	0.00627418
Dysf	2224.91	-0.268147	0.0746066	-3.59414	0.000325459	0.00632759
P2ry1	432.509	-0.478633	0.133164	-3.5943	0.000325262	0.00632759
Mfsd3	151.235	-0.665338	0.185216	-3.59223	0.000327855	0.0063656
Kank3	1881.91	0.323568	0.0901069	3.59094	0.00032949	0.00638016
Snx4	729.044	0.341949	0.0952222	3.59107	0.000329326	0.00638016
Lrrc15	674.525	-0.423788	0.118073	-3.58921	0.000331684	0.00641404
Sh2d3c	1037.34	0.371033	0.1035	3.58486	0.000337256	0.00651305
Dsc2	1104.3	0.379239	0.105854	3.58266	0.000340119	0.00655956
Atf6	2563.09	0.443069	0.123833	3.57794	0.000346308	0.00667001
Pde7a	673.476	-0.411961	0.115189	-3.5764	0.000348355	0.00670049
Tgm2	4300.96	0.323349	0.0904318	3.57562	0.000349404	0.00671171
Lrtm2	18.6343	2.5254	0.706534	3.57436	0.000351089	0.00673512
Ghr	2958.45	-0.250597	0.0701523	-3.57218	0.000354023	0.00678238
Htra1	2527.05	-0.292407	0.0818969	-3.57043	0.000356392	0.00681872
Bcat2	2176.75	-0.313866	0.0879951	-3.56686	0.000361287	0.00690321
Arap1	926.885	-0.408588	0.114717	-3.56169	0.00036847	0.00703116
Gnb3	169.898	0.739711	0.207773	3.56018	0.000370597	0.00706239
Aen	803.462	0.537566	0.151054	3.55878	0.000372588	0.00709096
Dedd2	668.439	-0.364163	0.102346	-3.55815	0.000373471	0.00709842
Rtn4r	144.388	-0.989434	0.27819	-3.55669	0.000375559	0.00712871
Wsb2	2314.01	0.282734	0.0795443	3.55442	0.00037882	0.00718116
Rnd3	471.953	0.486497	0.136997	3.55116	0.000383538	0.00726105
Actb	7661.83	-0.359499	0.101249	-3.55065	0.000384286	0.00726568
Sema6b	544.586	0.586525	0.165316	3.5479	0.000388319	0.00733231
Itih4	71.638	-1.05056	0.296237	-3.54636	0.000390587	0.00736549
Ednra	1146.66	0.392052	0.110643	3.54338	0.000395031	0.00743958
Dync1h1	7263.4	0.258189	0.072892	3.54208	0.000396985	0.00746663
Nudt8	777.821	-0.414107	0.117044	-3.53805	0.000403091	0.00757159
Fgf1	4636	0.312582	0.0883814	3.53674	0.000405106	0.00759955
Alad	772.016	-0.339498	0.0960869	-3.53324	0.000410505	0.00769084
Abi3bp	356.383	-0.488205	0.138329	-3.52932	0.000416633	0.00779552
Atp2a2	324125	-0.2581	0.0731387	-3.52891	0.000417281	0.00779753
Trabd	1250.87	-0.345482	0.0979108	-3.52854	0.000417859	0.00779822
Mbd3	1653.51	-0.291375	0.0826033	-3.5274	0.000419655	0.00782164
Naglu	400.267	-0.497243	0.140986	-3.5269	0.000420449	0.00782633
Gfm1	3425.48	-0.243649	0.0691301	-3.5245	0.000424284	0.00787738
Rasd1	86.2955	1.09561	0.310829	3.52482	0.000423776	0.00787738
Akt1s1	1451.76	-0.29539	0.0838204	-3.52408	0.000424955	0.00787969
Tenm4	33.2529	1.64254	0.466569	3.52047	0.000430781	0.00797746
Ddr1	1211.57	0.368699	0.104755	3.51962	0.000432163	0.0079928
Myh7b	2877.89	-0.454859	0.129253	-3.51914	0.000432943	0.00799697
Rxra	1912.46	-0.279927	0.0796927	-3.51257	0.000443787	0.0081868
Hif1a	1713.86	0.330467	0.094113	3.51139	0.000445778	0.00820365
Rps14	5189.82	0.241083	0.0686582	3.51135	0.000445838	0.00820365
Egflam	339.81	-0.528867	0.150782	-3.50749	0.000452352	0.00831291
Gsta3	217.473	0.643	0.183377	3.50645	0.00045413	0.00833496
Hdac11	323.523	-0.547325	0.156159	-3.50491	0.00045676	0.00837258
Fam122a	367.641	0.466221	0.133081	3.50328	0.000459562	0.00840332
Ipo4	1214.4	0.288374	0.0823239	3.50292	0.000460185	0.00840332
Rnls	157.76	-0.746995	0.213237	-3.50311	0.000459852	0.00840332
Hr	767.154	-0.458082	0.130858	-3.50062	0.000464184	0.00846563
Pias4	539.511	-0.367965	0.105142	-3.4997	0.000465777	0.00848396
Syt3	80.5116	-0.86364	0.2468	-3.49935	0.000466392	0.00848445
Rps23	3130.59	0.237291	0.0678425	3.49767	0.000469336	0.00852725
Rps5	4537.5	0.25372	0.0725977	3.49488	0.000474282	0.00860627
Fam168a	1189.06	0.399624	0.114363	3.49435	0.000475209	0.00861227
Lmna	3750.9	0.301818	0.0863901	3.49367	0.000476436	0.00862367
Tmem14c	1333.29	-0.328095	0.0939249	-3.49317	0.000477326	0.00862896
Dcaf5	1127.42	-0.330975	0.0948419	-3.48976	0.000483462	0.00871803
Ptges3	1350.08	0.32856	0.0941469	3.48986	0.000483275	0.00871803
Hsd17b10	1918.11	0.30591	0.0877385	3.48661	0.000489175	0.00881004
Fas	235.196	0.687622	0.19735	3.48427	0.000493478	0.00887645
Klhdc1	494.097	-0.543673	0.156128	-3.48222	0.000497282	0.0089187
Pttg1	962.963	-0.349251	0.100287	-3.48252	0.000496718	0.0089187
Tsr1	342.495	0.508806	0.146125	3.482	0.000497681	0.0089187
mt-Nd1	360524	-0.249942	0.0718064	-3.48078	0.000499954	0.00894831
D3Ertd751e	347.653	-0.482063	0.138648	-3.47687	0.000507302	0.00906857
Eif3h	3134.76	0.261877	0.0753835	3.47393	0.000512903	0.00914076
Map1lc3a	8249.3	-0.337533	0.097163	-3.47389	0.000512975	0.00914076
Pdgfc	68.8473	0.897935	0.258492	3.47375	0.000513241	0.00914076
B4gat1	1124.94	-0.314951	0.090686	-3.47298	0.000514708	0.00915559
Fbxo32	3275.2	0.3781	0.108943	3.47063	0.000519236	0.00921666
Osgepl1	645.619	-0.381108	0.109812	-3.47054	0.000519419	0.00921666
Lrrc8a	377.197	0.461645	0.133118	3.46794	0.000524471	0.00929486
Ccni	3434.07	-0.342013	0.098675	-3.46606	0.000528151	0.00934611
Cstf3	268.197	0.534886	0.154333	3.4658	0.000528659	0.00934611
Ppp1r11	691.45	0.37925	0.109487	3.46389	0.00053243	0.00940126
Synpo2	3218.09	-0.311001	0.0898467	-3.46146	0.00053725	0.00947477
Map2k3	1857.65	0.297114	0.0859371	3.45735	0.000545517	0.00960883
Rbp7	165.719	0.808871	0.234083	3.45548	0.000549308	0.00965202
Tmem182	4340.74	0.322737	0.0933905	3.45578	0.000548698	0.00965202
2610301B20Rik	172.038	0.588363	0.170308	3.4547	0.000550906	0.00966833
Casq2	17625.4	0.287226	0.0832704	3.44932	0.000562001	0.00985107
Tlr4	284.051	0.512747	0.148688	3.44847	0.000563769	0.00987007
Pygb	20040.2	-0.333284	0.0966591	-3.44804	0.000564673	0.00987392
Antxr2	2962.02	-0.307757	0.0893631	-3.44389	0.000573401	0.0100085
Hist1h1c	2496.62	0.358824	0.104197	3.44373	0.000573759	0.0100085
Enpp2	191.774	-0.62413	0.18126	-3.44328	0.000574702	0.0100129
Fat1	919.667	0.340022	0.0988033	3.4414	0.000578714	0.0100706
Rbm45	351.748	0.455411	0.132392	3.43987	0.000581991	0.0101154
Eif3a	3969.29	0.242884	0.0708002	3.43055	0.000602361	0.010454
Phldb1	4874.13	-0.262734	0.0765922	-3.4303	0.00060292	0.010454
Urm1	400.128	-0.426025	0.124247	-3.42885	0.000606146	0.0104973
Adck3	11874.6	-0.334706	0.0976502	-3.4276	0.000608932	0.0105329
Gm22	87.9329	0.887556	0.259044	3.42628	0.00061192	0.01056
Trak1	9604.42	-0.239107	0.0697866	-3.42626	0.000611963	0.01056
Tnfaip8	1321.25	-0.332557	0.0972108	-3.42099	0.000623933	0.0107537
Elmsan1	783.531	0.370265	0.108271	3.4198	0.000626679	0.0107881
Ret	106.863	-0.797199	0.233348	-3.41636	0.000634653	0.0109124
Pdlim5	10663.3	0.215126	0.0629938	3.41503	0.00063774	0.0109524
Ubr4	3687.04	0.259853	0.076132	3.41318	0.000642086	0.011014
Slc9a3r2	3348	0.247713	0.0725877	3.4126	0.000643463	0.0110245
Sh3bgr	3068.33	-0.38968	0.114221	-3.41163	0.000645745	0.0110504
Fyco1	7494.41	-0.249745	0.0732391	-3.40999	0.000649641	0.0110908
Kbtbd13	88.5436	-0.916658	0.268798	-3.41022	0.000649114	0.0110908
Smarcd1	897.787	-0.367094	0.107677	-3.40921	0.000651516	0.0111097
Med13l	816.507	0.357745	0.105018	3.4065	0.000658014	0.0111851
mt-Nd2	261472	-0.250464	0.0735344	-3.40607	0.000659043	0.0111851
Nmb	54.1292	1.13845	0.334197	3.40654	0.000657917	0.0111851
Pkd2l2	238.224	-0.506851	0.148797	-3.40632	0.000658449	0.0111851
Sulf2	2215.18	0.336821	0.0989527	3.40386	0.000664408	0.0112629
AI506816	640.792	0.45689	0.134302	3.40197	0.000669023	0.0113278
Nr1h3	297.52	-0.464382	0.136534	-3.40121	0.000670893	0.0113462
2900026A02Rik	1527.01	0.320949	0.0944933	3.39653	0.000682467	0.0115155
Synpo2l	5879.74	0.799195	0.235299	3.39651	0.000682499	0.0115155
Sympk	2810.14	-0.234801	0.0691905	-3.39355	0.000689933	0.0116273
Smyd1	11444.5	0.285785	0.0842439	3.39236	0.000692943	0.0116644
Dnajc4	612.008	-0.359151	0.105965	-3.38932	0.000700666	0.0117669
Hes6	372.494	-0.42889	0.126536	-3.38946	0.000700298	0.0117669
Bcl6	617.402	0.410124	0.121054	3.38795	0.000704177	0.0118122
Ehd1	3324.09	0.320379	0.0945873	3.38712	0.000706294	0.0118339
Arsi	37.2753	-1.21112	0.357698	-3.38587	0.000709533	0.0118744
Rpl31	2767.64	0.254899	0.0753122	3.38457	0.000712907	0.011917
Celsr3	82.6159	-1.08502	0.321042	-3.37967	0.000725739	0.0121175
Lace1	805.191	-0.324503	0.0961925	-3.37347	0.000742267	0.012322
Mef2d	4960.83	-0.24464	0.0725072	-3.37401	0.000740807	0.012322
Ncapd2	568.136	-0.352959	0.104608	-3.37409	0.000740596	0.012322
Rpl35	1804.59	0.268667	0.0796387	3.37357	0.000741996	0.012322
Tcaim	803.607	-0.321717	0.0953755	-3.37316	0.000743112	0.012322
Ube2f	677.244	0.351994	0.104325	3.37401	0.000740813	0.012322
Plxnb1	1607.7	-0.442994	0.1314	-3.37134	0.000748039	0.0123895
Dtna	1160.9	0.421648	0.125251	3.36642	0.000761517	0.0125838
Myocd	839.645	0.322877	0.0959067	3.36657	0.000761095	0.0125838
St3gal1	960.881	0.322445	0.0958242	3.36496	0.000765535	0.0126357
Pla2g5	724.666	-0.48258	0.143583	-3.36098	0.000776655	0.0128046
Stc1	70.1528	0.992262	0.295454	3.35844	0.000783845	0.0129084
Twsg1	2215.42	-0.295559	0.0880237	-3.35772	0.000785883	0.0129272
Cdh13	4919.01	0.260452	0.0776755	3.35308	0.000799179	0.0131309
Gm9892	159.773	0.586442	0.174959	3.35188	0.000802635	0.0131727
Cdh4	60.1182	-1.10637	0.33031	-3.3495	0.000809585	0.0132566
Prep	1007.78	0.325822	0.0972705	3.34965	0.00080914	0.0132566
Tmem62	144.353	0.706583	0.211107	3.34703	0.000816812	0.0133598
Atp6v1b2	1749.06	0.341091	0.101936	3.34611	0.000819527	0.013389
Ctnnal1	598.704	-0.450445	0.134723	-3.34349	0.000827331	0.0135012
Mical2	2403.74	0.352347	0.105416	3.34243	0.000830472	0.0135372
Aebp2	1065.03	0.286893	0.0858655	3.34119	0.000834198	0.0135395
Pptc7	3575.96	0.275598	0.0824652	3.34199	0.000831791	0.0135395
Rida	96.77	-0.741208	0.221833	-3.34129	0.000833916	0.0135395
Rnf13	1912.58	0.28504	0.0853125	3.34113	0.00083437	0.0135395
Nfix	5735.71	-0.290102	0.0868745	-3.33932	0.000839838	0.0136129
Prkaca	7162.54	0.24735	0.0740876	3.33862	0.000841948	0.0136318
Apba3	1422.62	-0.287201	0.0860845	-3.33627	0.000849117	0.0137325
Asap1	848.147	0.312079	0.0936365	3.33288	0.000859526	0.0138852
Parp3	1004.98	-0.319886	0.0960373	-3.33085	0.000865797	0.0139709
Tardbp	1993.57	0.274354	0.0823801	3.33034	0.000867399	0.0139811
Ghdc	328.196	-0.474369	0.142605	-3.32645	0.000879598	0.0141619
Sirt3	574.273	-0.343835	0.103392	-3.32553	0.000882503	0.0141928
Smg5	1691.13	-0.301555	0.0906903	-3.3251	0.000883856	0.0141988
Nexn	9548.16	0.270885	0.0814855	3.32433	0.000886305	0.0142223
Ighg2c	36.1367	-1.52486	0.458876	-3.32304	0.000890434	0.0142727
P2rx6	67.1681	-0.852677	0.256688	-3.32184	0.000894246	0.0143179
B4galt5	463.922	0.415373	0.125118	3.31986	0.000900627	0.0143881
Lnpep	468.441	0.437248	0.131703	3.31995	0.000900336	0.0143881
Cfl2	5228.86	0.278997	0.084138	3.31594	0.000913359	0.0145753
Rreb1	1338.94	0.333858	0.100776	3.31287	0.000923434	0.0147198
Zadh2	1883.21	-0.326981	0.0987509	-3.31117	0.000929066	0.0147933
Ralgapa2	1276.02	-0.310314	0.0937413	-3.31032	0.000931889	0.0148219
Znrf1	1641.63	-0.30286	0.0915261	-3.30901	0.00093628	0.0148753
Ndrg1	929.347	0.304145	0.0919428	3.30798	0.000939727	0.0149136
Gnl3	371.224	0.440622	0.133274	3.30615	0.000945876	0.0149812
Myadm	5194.57	-0.224674	0.0679576	-3.3061	0.000946059	0.0149812
Armc8	736.8	0.336172	0.101721	3.30485	0.000950279	0.0150315
Hnrnpf	1545.77	0.287421	0.0869948	3.30389	0.000953549	0.0150667
Pspc1	366.838	0.434484	0.131713	3.29873	0.000971249	0.0153296
Pcgf5	742.549	0.323132	0.098018	3.29666	0.000978421	0.0154259
Ckb	1504.74	-0.31089	0.0943443	-3.29527	0.000983273	0.0154686
Dctn4	1244.81	0.308964	0.0937562	3.29539	0.000982841	0.0154686
Fsd1l	1203.41	0.375874	0.114106	3.29407	0.000987493	0.0155012
Susd5	65.2063	-1.12676	0.342033	-3.2943	0.000986666	0.0155012
Cfp	205.437	-0.509937	0.154839	-3.29334	0.000990058	0.0155245
C1qb	875.007	-0.333586	0.101309	-3.29277	0.000992045	0.0155388
Agpat9	347.462	0.496998	0.150995	3.29149	0.000996591	0.0155931
Tead1	3014.23	0.272129	0.0826858	3.29112	0.000997885	0.0155964
Cdnf	491.881	-0.371575	0.112941	-3.29	0.00100186	0.0156247
Rps27l	718.599	0.35423	0.10766	3.29027	0.00100092	0.0156247
Edf1	2171.26	0.246393	0.0749225	3.28864	0.00100672	0.0156836
Mrps9	1219.33	-0.282131	0.0858193	-3.28751	0.00101079	0.0157299
Dab2ip	2585.03	0.265572	0.0807922	3.2871	0.00101226	0.0157358
Pm20d1	302.592	-0.569247	0.173231	-3.28607	0.00101597	0.0157766
Pdlim4	277.958	-0.582952	0.177461	-3.28495	0.00101999	0.0158219
Rps16	2731.18	0.232527	0.0708061	3.28399	0.00102347	0.0158588
Dclk3	30.5123	1.62699	0.495522	3.28339	0.00102566	0.0158757
Cyp2e1	91.995	-1.24583	0.379605	-3.28192	0.00103104	0.0159248
Gfra4	139.671	-0.662188	0.201753	-3.28218	0.00103009	0.0159248
Paip2b	865.45	-0.339589	0.103512	-3.28068	0.00103557	0.0159777
Sntb1	101.394	0.76349	0.232767	3.28006	0.00103785	0.0159957
Kdr	4064.56	-0.336487	0.102716	-3.27589	0.00105331	0.0162167
Cpeb4	1362.87	0.312451	0.0954145	3.27467	0.00105787	0.0162696
1810026J23Rik	1629.1	-0.280602	0.0857276	-3.27318	0.00106346	0.0162952
Notch4	1653.75	0.377665	0.115387	3.27302	0.00106405	0.0162952
Proser2	181.473	0.620438	0.189525	3.27365	0.00106168	0.0162952
Vtn	714.198	-0.436339	0.133308	-3.27316	0.0010635	0.0162952
Neurl2	366.554	-0.41024	0.125425	-3.27081	0.0010724	0.0164056
4631405J19Rik	141.543	-0.611802	0.187218	-3.26785	0.00108366	0.0165603
Ndufs1	10806.3	-0.248712	0.0761316	-3.26687	0.00108744	0.0166004
Adal	163.54	-0.597141	0.182824	-3.26621	0.00108999	0.0166217
Mapkapk2	8348.79	0.240955	0.0738021	3.26488	0.00109511	0.0166822
Fam212b	812.309	-0.487865	0.149494	-3.26344	0.0011007	0.0167497
Nudt17	42.5625	1.0867	0.333088	3.2625	0.00110436	0.0167877
Il13ra1	1226.86	0.326891	0.100214	3.26192	0.0011066	0.016804
Olfml3	519.078	-0.385109	0.118074	-3.2616	0.00110787	0.0168056
Lrrc59	1166.18	0.32309	0.0991247	3.25943	0.00111636	0.0169166
Kidins220	1542.19	0.287	0.0880787	3.25845	0.00112021	0.0169571
Rab10	3454.26	0.262052	0.0804338	3.25798	0.00112208	0.0169677
Tmem38a	8400.05	-0.234562	0.0720426	-3.25588	0.00113043	0.0170761
Tmbim4	1062.06	0.313475	0.0962894	3.25555	0.00113174	0.0170779
Osbpl8	1829.13	0.289966	0.0891374	3.25303	0.00114183	0.0172121
Plcxd2	15.1434	2.07382	0.63782	3.25142	0.00114831	0.0172918
Abat	474.654	0.638558	0.196516	3.24939	0.00115654	0.0173917
Rest	470.782	0.374641	0.115303	3.24919	0.00115736	0.0173917
Osbpl3	631.134	0.369608	0.113777	3.24853	0.00116005	0.017414
Acox1	7564.54	0.267745	0.0825202	3.2446	0.00117617	0.0175204
Car4	480.657	0.549227	0.169253	3.24501	0.00117445	0.0175204
Ccdc69	155.757	-0.650622	0.200445	-3.24588	0.00117087	0.0175204
E2f6	1842.33	-0.261585	0.0806231	-3.24454	0.00117639	0.0175204
Esrra	4070.3	-0.242801	0.0748362	-3.24443	0.00117685	0.0175204
Gm42732	111.713	-0.743401	0.229075	-3.24523	0.00117355	0.0175204
Ndufc2	1416.33	-0.275997	0.0850429	-3.24539	0.00117291	0.0175204
Plxna2	1020.2	0.333095	0.102602	3.24647	0.00116845	0.0175204
Fbxw11	1315.69	0.319889	0.098655	3.2425	0.00118486	0.0176215
Gm11808	519.603	0.350782	0.108242	3.24073	0.00119226	0.0176992
Rnf157	241.808	0.565091	0.174375	3.24066	0.00119254	0.0176992
Dnajb2	1951.18	-0.286224	0.0883824	-3.23847	0.00120173	0.0178173
Mnat1	258.195	0.509932	0.15752	3.23726	0.00120682	0.0178744
Mdp1	950.887	-0.299327	0.0925338	-3.23478	0.00121735	0.0180117
Ablim3	1658.96	0.336257	0.103976	3.23398	0.00122079	0.0180442
Atpif1	1037.57	0.396755	0.122729	3.23278	0.00122594	0.0180832
Cln8	510.159	0.403172	0.12471	3.23288	0.00122547	0.0180832
Azi2	1376.02	-0.268915	0.0832682	-3.22951	0.00124003	0.0182724
Cep170b	544.82	0.352939	0.109335	3.22804	0.00124643	0.0183293
Ifrd2	1178.56	-0.301047	0.0932529	-3.22829	0.00124533	0.0183293
Slc2a4	9842.9	-0.28123	0.0871357	-3.2275	0.00124878	0.0183451
1010001N08Rik	146.331	0.59801	0.185408	3.22538	0.00125806	0.0184439
Mrps11	310.638	-0.412745	0.127967	-3.22541	0.00125794	0.0184439
Cotl1	296.136	-0.449476	0.139391	-3.22457	0.00126161	0.0184772
Banp	265.128	-0.497963	0.154467	-3.22374	0.00126528	0.018512
Gja3	302.707	-0.461108	0.143103	-3.22221	0.00127206	0.0185924
Btf3	2115.14	0.247249	0.0767475	3.22159	0.00127483	0.0185952
Rnf207	2818.62	-0.465384	0.144454	-3.22168	0.00127441	0.0185952
Htatip2	260.511	-0.519501	0.161272	-3.22127	0.00127626	0.0185973
Baiap2l1	418.15	0.545296	0.169338	3.22016	0.00128117	0.0186411
Snx14	495.865	0.350766	0.108933	3.22001	0.00128185	0.0186411
Mrpl3	1772.44	-0.254858	0.0791717	-3.21905	0.00128614	0.0186847
Lrp1	8085.41	0.364177	0.113277	3.21493	0.00130474	0.0189271
Tmem86a	686.904	-0.478824	0.148945	-3.21478	0.00130545	0.0189271
Mif	1373.45	0.324859	0.101085	3.21372	0.00131026	0.0189587
Rrs1	698.99	0.32874	0.102284	3.214	0.00130899	0.0189587
Dph5	125.829	0.680901	0.21219	3.20892	0.00133235	0.019259
Gm13341	231.939	0.73749	0.229869	3.20831	0.00133519	0.0192807
Tmem47	392.541	-0.449453	0.140158	-3.20676	0.00134241	0.0193656
Col18a1	648.793	-0.364792	0.113802	-3.20548	0.00134836	0.019432
Slk	3245.66	-0.217966	0.0680045	-3.20517	0.00134983	0.0194338
Lamc3	15.3691	-1.86311	0.581841	-3.20209	0.00136436	0.0196235
Intu	788.53	-0.47602	0.14868	-3.20164	0.00136649	0.0196345
Rrbp1	2995.79	-0.264338	0.0825718	-3.20132	0.00136801	0.0196368
Kcnip2	4665.85	-0.379496	0.118676	-3.19775	0.00138505	0.0198227
Map3k4	1165.69	-0.271398	0.0848719	-3.19774	0.00138509	0.0198227
Sirpa	1025.93	-0.299567	0.0936671	-3.19821	0.00138282	0.0198227
Mpped2	429.464	-0.416756	0.130362	-3.19691	0.00138911	0.0198605
Rps28	794.51	0.30392	0.0950799	3.19648	0.00139118	0.0198704
Mrpl35	696.017	0.414958	0.129854	3.19557	0.00139553	0.0199129
Gm15440	432.692	0.454028	0.142106	3.195	0.00139829	0.0199326
Uqcrq	9300.44	-0.205604	0.0643603	-3.19457	0.00140039	0.0199427
Rabl6	1981.2	-0.279217	0.0874395	-3.19326	0.00140676	0.0200137
Ifngr2	3418.54	-0.268036	0.083966	-3.1922	0.00141194	0.0200676
Mllt3	220.672	-0.488567	0.153096	-3.19125	0.00141658	0.0201137
Cnga3	54.4047	-0.998512	0.313139	-3.18872	0.00142906	0.0202313
Slc7a8	109.719	0.654763	0.205318	3.18902	0.00142757	0.0202313
Tmem53	292.041	0.550956	0.172781	3.18876	0.00142885	0.0202313
Plin1	37.6296	-1.77662	0.557241	-3.18825	0.00143139	0.0202443
Lzts3	184.801	-0.516737	0.162118	-3.18741	0.00143551	0.0202827
Pde7b	549.379	-0.390214	0.122501	-3.18538	0.00144565	0.020406
Vamp3	1379.13	0.27937	0.0877948	3.18208	0.00146223	0.0206199
Mccc1	2111.87	-0.246117	0.0773618	-3.18138	0.00146577	0.0206496
Anxa4	507.136	0.378918	0.119153	3.18011	0.00147221	0.0207201
Rps29	1432.62	0.269842	0.0848889	3.17877	0.00147903	0.0207957
Adck1	652.074	0.346831	0.109229	3.17527	0.00149699	0.0210278
Kcne1	284.402	0.621076	0.195722	3.17326	0.00150739	0.0211533
Nog	14.2311	1.95527	0.616313	3.17253	0.00151119	0.021186
Macrod1	4474.62	-0.279063	0.0880328	-3.17	0.00152441	0.0213507
Art4	482.889	0.449852	0.142033	3.16724	0.00153891	0.0215328
Ifi27l2a	290.12	-0.464048	0.14666	-3.16412	0.00155555	0.0217446
2700029M09Rik	389.184	-0.457472	0.144673	-3.16211	0.00156629	0.0218312
Hbb-bs	599.429	-1.35345	0.427947	-3.16267	0.0015633	0.0218312
Slc29a1	1407.65	-0.257922	0.0815637	-3.16221	0.00156576	0.0218312
Hdgf	2714.07	-0.225374	0.0712818	-3.16173	0.00156836	0.0218389
Rplp0	13128.8	0.194863	0.0616687	3.15984	0.00157858	0.02196
1700123M08Rik	45.7726	-1.04534	0.330869	-3.15937	0.0015811	0.0219739
1810021B22Rik	44.1302	-1.0618	0.336189	-3.15835	0.00158663	0.0219873
Acadvl	10191.2	-0.212084	0.0671469	-3.15851	0.00158576	0.0219873
Ppp1r1b	45.021	-1.68444	0.533242	-3.15887	0.00158383	0.0219873
Selt	3450.7	0.221412	0.0701272	3.15729	0.00159242	0.0220463
Kcna7	167.452	-0.625919	0.198265	-3.15698	0.00159414	0.022049
Uros	481.207	-0.35681	0.113045	-3.15636	0.00159751	0.0220745
Spag9	3284.28	0.236389	0.0749634	3.15339	0.00161384	0.0222787
Tulp4	1126.9	0.345289	0.109509	3.15307	0.00161561	0.0222818
Cdk5	359.306	-0.403947	0.128146	-3.15223	0.00162028	0.0223246
Tns1	30791.5	0.272953	0.086598	3.15196	0.00162181	0.0223246
Btbd3	757.471	0.389287	0.123583	3.15	0.0016327	0.0224531
Itga9	1794.73	0.336572	0.106879	3.1491	0.00163773	0.0225008
D17Wsu92e	4312.07	-0.212338	0.0674529	-3.14794	0.00164424	0.022539
Gm10925	8261.15	-0.357346	0.113524	-3.14777	0.0016452	0.022539
Kansl2	1057.55	-0.314369	0.0998676	-3.14786	0.00164472	0.022539
Adgrf5	5652.17	0.27798	0.0883641	3.14585	0.00165604	0.0226661
Gatsl2	937.526	-0.306044	0.0973095	-3.14505	0.00166056	0.0227064
Them4	238.711	0.528058	0.167964	3.14389	0.0016672	0.0227756
Polr1e	453.14	0.435334	0.13849	3.14345	0.00166971	0.0227883
Wisp2	301.743	0.51367	0.163472	3.14224	0.0016766	0.0228608
Sgms1	1103.93	0.34754	0.110727	3.13871	0.00169695	0.0231164
Thrap3	2194.2	-0.255154	0.0813182	-3.13773	0.00170262	0.0231717
Dguok	405.413	-0.419567	0.133732	-3.13737	0.00170474	0.0231786
Crnde	115.778	0.773413	0.246613	3.13615	0.00171183	0.0232532
Osbpl6	295.272	-0.44539	0.142041	-3.13564	0.00171477	0.0232712
Ubr2	3325.08	0.308464	0.0983991	3.13483	0.00171954	0.023314
Gpr68	25.3643	1.50271	0.479439	3.1343	0.00172262	0.0233339
Adamts1	934.864	0.480931	0.15346	3.13391	0.00172493	0.0233432
Lyz2	2290.26	-0.33964	0.108392	-3.13344	0.0017277	0.0233587
Gde1	873.824	0.327529	0.104586	3.13168	0.00173811	0.0234776
Fam131a	436.581	-0.419838	0.134128	-3.13012	0.00174732	0.0235686
Sptb	4341.43	0.246015	0.0785992	3.12999	0.00174812	0.0235686
Gpr146	2889.92	0.255742	0.0818091	3.12608	0.00177154	0.023862
Micall1	1939.4	0.371877	0.119047	3.12379	0.00178536	0.0240258
Nr0b2	225.063	0.600934	0.192513	3.12153	0.00179914	0.0241886
Mrpl38	1142.08	-0.273906	0.087814	-3.11916	0.00181369	0.0243615
Atp1a1	28423.8	0.185349	0.0594458	3.11794	0.00182118	0.0244394
Ythdc1	967.584	0.280532	0.0899909	3.11733	0.00182495	0.0244672
Tmx2	1533.91	-0.287678	0.0924121	-3.113	0.00185198	0.0247836
Ubap2l	2529.27	0.224202	0.0720207	3.11302	0.00185182	0.0247836
Maf1	2187.24	-0.284966	0.0915618	-3.11228	0.00185649	0.0248209
Rps7	3772.72	0.22547	0.0724552	3.11186	0.00185913	0.0248332
Vamp2	2106.89	0.266734	0.085752	3.11053	0.00186755	0.0249225
Nmd3	409.75	0.432258	0.139011	3.10951	0.00187397	0.024962
Ssbp3	769.322	-0.292199	0.0939627	-3.10973	0.00187256	0.024962
Gm13889	190.429	0.513786	0.165357	3.10714	0.00188905	0.0251397
Steap3	1114.4	-0.277926	0.0894941	-3.10553	0.0018994	0.0252541
Ighm	151.116	-0.59182	0.19062	-3.10471	0.00190468	0.0252777
S1pr3	580.144	-0.324707	0.104577	-3.10497	0.00190297	0.0252777
Pdp2	403.978	-0.527914	0.170225	-3.10126	0.00192696	0.02555
Ppm1e	388.303	0.37894	0.122201	3.10097	0.0019289	0.0255522
Rarb	378.787	-0.429682	0.138599	-3.10019	0.00193397	0.0255959
Clec11a	53.7129	-1.04244	0.336711	-3.09595	0.00196182	0.0259406
Mmp9	18.0813	-1.74618	0.564079	-3.09563	0.00196394	0.0259449
Arpc5l	1179.47	-0.270414	0.0873879	-3.09441	0.00197207	0.025995
Isoc2a	921.129	-0.32811	0.106028	-3.09455	0.00197109	0.025995
Pcdh20	13.5837	2.01927	0.65259	3.09425	0.00197314	0.025995
Camkk2	449.132	0.367951	0.118976	3.09264	0.00198384	0.0261121
Ntsr2	157.773	0.639941	0.207003	3.09146	0.00199178	0.0261927
Tbl1xr1	818.391	0.289258	0.0936385	3.08909	0.00200769	0.0263779
Pld2	326.675	-0.39149	0.126764	-3.08834	0.00201278	0.0264207
Hipk1	1852.48	0.381143	0.123429	3.08795	0.00201545	0.0264317
Ppp2ca	3852.18	0.254956	0.0825972	3.08674	0.00202364	0.026515
Adrbk2	410.874	0.400356	0.129741	3.08581	0.00203002	0.0265745
Ddhd1	329.779	0.41141	0.133353	3.08512	0.00203473	0.026612
Uaca	1448.25	-0.276987	0.089807	-3.08425	0.00204066	0.0266653
Myo18b	7826.21	0.31138	0.100989	3.0833	0.0020472	0.0267266
Gm13910	6343.51	-0.207215	0.067222	-3.08254	0.0020524	0.0267702
Pmpca	2304.3	-0.238354	0.0773631	-3.08098	0.00206321	0.0268869
Atf3	203.046	0.829473	0.269334	3.07972	0.00207197	0.0269768
Noc2l	771.606	0.311426	0.101176	3.07806	0.0020835	0.0271024
Gm11266	58.2425	-1.04061	0.338133	-3.0775	0.00208742	0.0271289
Mafk	1053.53	0.276772	0.0899691	3.07631	0.00209583	0.0272137
D2hgdh	610.887	-0.349102	0.113494	-3.07595	0.00209836	0.0272221
Gm4955	16.9612	-1.86427	0.606165	-3.07551	0.00210141	0.0272279
Prob1	2483.32	-0.252617	0.0821427	-3.07535	0.00210258	0.0272279
Gpr108	752.148	-0.296749	0.0965932	-3.07215	0.00212521	0.0274592
Rnf122	167.216	0.564432	0.183733	3.07202	0.00212616	0.0274592
Sbk1	2309.84	-0.423442	0.137821	-3.07241	0.00212341	0.0274592
Per2	1089.49	0.387726	0.126236	3.07144	0.0021303	0.0274881
Fam49b	469.981	0.363561	0.118382	3.07109	0.00213278	0.0274955
Zfp503	99.5686	-0.707203	0.230344	-3.07021	0.00213908	0.0275521
Ctbp1	3713.08	-0.25755	0.083894	-3.06994	0.00214101	0.0275524
Mapk1	2999.81	0.246436	0.0803157	3.06834	0.00215248	0.0276391
Pabpc1	2702.92	0.284781	0.0928153	3.06826	0.00215312	0.0276391
Vars2	676.627	-0.319404	0.104101	-3.0682	0.00215349	0.0276391
Lrrc55	37.4706	-1.29983	0.423702	-3.06779	0.0021565	0.0276531
2810417H13Rik	18.5812	-1.51857	0.495443	-3.06508	0.00217615	0.0278802
Kat2b	2298.25	0.229827	0.0749917	3.0647	0.00217891	0.0278844
Nabp1	1173.97	0.482742	0.157527	3.0645	0.00218034	0.0278844
Derl2	557.068	-0.325358	0.106206	-3.06346	0.00218794	0.0279568
Rps9	6510.69	0.199323	0.065097	3.06194	0.00219907	0.0280741
Ttc38	649.832	-0.356239	0.116584	-3.05565	0.00224573	0.0286444
Acta1	10569.7	1.74655	0.571733	3.05483	0.0022519	0.0286978
Rps11	2925.78	0.226149	0.0740752	3.05297	0.00226591	0.0288508
Scn4b	743.493	-1.643	0.538346	-3.05195	0.00227362	0.0289235
Cyc1	16913.2	-0.200766	0.0657923	-3.05152	0.00227687	0.0289394
Dclre1b	136.124	0.681912	0.223537	3.05055	0.00228421	0.029007
Asb5	288.102	-0.602509	0.197637	-3.04857	0.00229934	0.0291735
Zbtb7a	1698.4	-0.246814	0.0809718	-3.04815	0.00230258	0.029189
Tfcp2l1	22.8922	1.52864	0.501589	3.04761	0.00230673	0.0292158
Cdk10	353.124	-0.393653	0.1293	-3.0445	0.00233067	0.029475
Cpne7	34.261	1.20381	0.395414	3.04442	0.00233128	0.029475
Syvn1	821.849	-0.28605	0.0939798	-3.04374	0.00233659	0.0295163
Gm12250	53.0801	-1.33635	0.439187	-3.04278	0.00234405	0.0295847
Tubb4a	92.2748	-0.781935	0.257065	-3.04178	0.00235183	0.029657
Dpep1	1127.21	0.913592	0.300479	3.04045	0.00236223	0.0296585
Drap1	2848.19	0.228338	0.0750772	3.04138	0.00235496	0.0296585
Eif4ebp1	1347.27	0.373525	0.122829	3.041	0.0023579	0.0296585
Ptgr2	4473.02	-0.228752	0.0752341	-3.04054	0.00236154	0.0296585
Tmem65	5261.25	-0.248419	0.0816907	-3.04097	0.00235819	0.0296585
Psma1	1669.52	-0.240108	0.0790546	-3.03724	0.00238758	0.0299506
Cnn1	126.985	-0.811651	0.267376	-3.03561	0.00240048	0.0300862
Tbc1d16	2044.84	-0.242969	0.0801061	-3.0331	0.00242058	0.0303119
mt-Rnr1	31569.9	-0.32437	0.106957	-3.03271	0.00242366	0.0303241
Fgfr3	384.229	0.501882	0.165575	3.03114	0.00243634	0.0304564
Apex2	144.255	-0.633269	0.208977	-3.03034	0.00244281	0.0305062
Slc22a3	135.606	-0.766556	0.252979	-3.03012	0.00244456	0.0305062
Gm21887	68.5839	1.07798	0.355889	3.02899	0.00245373	0.0305943
Klhl40	406.19	-0.523255	0.172786	-3.02835	0.00245896	0.0306066
Mrpl15	928.049	0.306308	0.101144	3.02844	0.00245816	0.0306066
Capn1	754.271	-0.302335	0.0998515	-3.02784	0.00246306	0.0306311
Gm2606	132.892	3.10642	1.02628	3.02687	0.00247097	0.030703
Inafm2	871.833	0.320897	0.10604	3.02618	0.00247662	0.0307419
Rassf8	1000.56	-0.274831	0.0908241	-3.02597	0.00247836	0.0307419
Sbf2	1329.84	0.287421	0.0950512	3.02385	0.00249578	0.0309314
Nsa2	868.553	0.278593	0.0921751	3.02243	0.00250755	0.0310506
Dnaja1	1323.14	-0.392919	0.130062	-3.02102	0.00251928	0.031164
Gm16534	21.5006	-1.58297	0.524022	-3.02081	0.00252103	0.031164
Sync	322.917	-0.45992	0.152318	-3.01948	0.00253206	0.0312736
Aig1	765.69	0.321938	0.106672	3.01801	0.0025444	0.0313549
Rnf169	448.312	0.457167	0.151484	3.01792	0.00254517	0.0313549
Wbscr17	198.002	-0.560781	0.185802	-3.01817	0.00254305	0.0313549
Eif1b	697.034	-0.322015	0.106738	-3.01688	0.00255391	0.0314358
Usp28	3201.83	0.310024	0.102796	3.01592	0.00256199	0.0315083
Cyp26a1	13.1593	-2.05146	0.680444	-3.01488	0.00257077	0.0315894
Tnrc6c	1764.22	0.229598	0.0761763	3.01404	0.00257793	0.0316504
Coro1a	235.716	-0.608846	0.202185	-3.01133	0.00260107	0.0319073
Eif3g	1116.12	0.269208	0.089468	3.00899	0.00262115	0.0321263
Rbbp7	2812.57	0.211983	0.0704661	3.0083	0.00262711	0.0321721
Ky	631.634	-0.558691	0.185787	-3.00715	0.00263707	0.0322667
E230001N04Rik	11.4287	2.17337	0.722831	3.00675	0.00264055	0.0322819
Auts2	658.919	-0.381081	0.126791	-3.00559	0.00265065	0.0322958
Clmn	79.4171	0.877869	0.292071	3.00567	0.00264995	0.0322958
Ech1	18817.2	-0.214566	0.0713798	-3.00598	0.00264727	0.0322958
Gm11427	18.4531	-2.5394	0.844785	-3.00598	0.00264731	0.0322958
Rbpms	3835.4	0.293146	0.0975498	3.00509	0.00265502	0.0323206
Rpl23	2466.65	0.230153	0.076594	3.00484	0.00265716	0.0323206
Rps20	2729.09	0.205905	0.0685836	3.00225	0.00267991	0.0325698
Sarnp	320.51	0.471618	0.157124	3.00157	0.00268592	0.0326154
Nid1	4702.14	0.313303	0.104417	3.0005	0.00269539	0.0327028
Pou3f1	21.9544	1.53061	0.510267	2.99962	0.00270314	0.0327693
Adipoq	21.6191	-1.77778	0.592754	-2.99918	0.00270706	0.0327893
Ackr4	129.804	0.695787	0.232099	2.9978	0.00271938	0.0329109
Adap1	86.308	0.805863	0.268952	2.99631	0.00273272	0.033021
Gm4332	178.457	0.521039	0.173896	2.99627	0.00273306	0.033021
Selenbp1	2166.95	-0.35708	0.119259	-2.99417	0.00275196	0.0332216
Serinc1	5847.69	0.22113	0.0738778	2.99319	0.00276078	0.0333002
Timeless	383.06	-0.416135	0.13911	-2.99142	0.00277687	0.0334383
Top2a	71.7445	-1.00278	0.335215	-2.99146	0.00277644	0.0334383
Ptprb	2858.37	0.245769	0.0821777	2.9907	0.0027834	0.0334617
Xist	4325.23	0.246023	0.0822629	2.99069	0.00278345	0.0334617
Slc38a10	2637.52	-0.214768	0.0718251	-2.99014	0.00278845	0.0334939
Urod	1018.14	-0.320854	0.107314	-2.98986	0.00279106	0.0334974
Matr3	1941.52	0.2394	0.0801065	2.98852	0.00280333	0.0336167
Mmp15	3731.06	-0.297198	0.0994702	-2.98781	0.00280987	0.0336671
Cdc42se2	985.969	0.273469	0.0915497	2.98711	0.0028163	0.0336993
Ttc19	868.558	0.325009	0.108808	2.98701	0.00281723	0.0336993
Jdp2	248.933	0.486174	0.162917	2.98419	0.0028433	0.0339553
Myadml2	522.601	-0.353152	0.118341	-2.98419	0.00284334	0.0339553
Ngfr	32.1805	-1.10881	0.371966	-2.98094	0.00287367	0.0342891
Lbh	14686.6	0.35139	0.118	2.97789	0.00290239	0.0346032
Lrfn4	448.889	-0.381489	0.128156	-2.97676	0.00291312	0.0347025
Myzap	3305.83	0.287809	0.0967059	2.97613	0.00291915	0.0347456
Sod3	1159.3	-0.327574	0.110111	-2.97493	0.00293053	0.0348523
Fam109a	411.455	-0.377695	0.127004	-2.97388	0.00294057	0.0349141
Gm21857	12.0584	2.07731	0.698494	2.97398	0.0029396	0.0349141
Snrpn	489.419	-0.357106	0.12021	-2.9707	0.00297127	0.0352496
Ppp1r10	781.822	0.359082	0.120928	2.96939	0.0029839	0.0353704
Smim4	185.318	0.520858	0.175429	2.96905	0.00298724	0.0353809
Cacybp	851.823	-0.360158	0.121377	-2.96727	0.00300457	0.035557
1500009L16Rik	44.9576	0.986115	0.332363	2.96698	0.00300739	0.0355611
Angptl7	292.43	0.523406	0.176459	2.96616	0.00301547	0.0356275
Eif4g2	18408.4	-0.180349	0.0608532	-2.96367	0.00303997	0.0358876
Fbxw8	1438.83	0.274391	0.092613	2.96277	0.00304882	0.0359626
Slc37a2	81.6355	-0.711268	0.240249	-2.96054	0.00307098	0.0361944
Exoc6	725.103	0.305047	0.103057	2.95999	0.00307647	0.0362183
mt-Te	1910.77	-0.409482	0.138346	-2.95984	0.00307802	0.0362183
Tmem245	2196.02	0.297105	0.100415	2.95877	0.00308871	0.0363143
Nmnat1	359.594	-0.40784	0.137887	-2.95779	0.00309853	0.0363607
Ppip5k1	1329.19	-0.309125	0.104501	-2.95809	0.00309547	0.0363607
Slc16a1	6981.86	0.346985	0.117319	2.95762	0.00310021	0.0363607
Efhd2	1098.71	0.351006	0.118821	2.95407	0.00313613	0.0366683
Mrm1	454.045	-0.468576	0.158623	-2.95402	0.00313661	0.0366683
Plekha6	4358.64	0.200134	0.0677356	2.95464	0.00313036	0.0366683
Prkcq	92.9189	-0.748911	0.253494	-2.95435	0.00313323	0.0366683
Olfml2b	523.9	-0.380589	0.12893	-2.95191	0.00315816	0.0368903
Fam169a	30.2386	1.14461	0.387985	2.95013	0.00317637	0.0370431
Rpl36a	950.627	0.272968	0.0925261	2.95017	0.00317602	0.0370431
Ept1	529.705	0.331776	0.11251	2.94886	0.0031895	0.0371662
2010111I01Rik	1114.46	0.35402	0.120101	2.94769	0.00320157	0.0372239
Exoc4	1112.17	0.349096	0.11843	2.94769	0.00320157	0.0372239
Trmt5	477.205	-0.373662	0.126767	-2.94763	0.00320219	0.0372239
Tmem132a	248.064	-0.552389	0.187426	-2.94723	0.0032063	0.0372416
Epha2	293.494	0.444034	0.150677	2.94693	0.00320944	0.0372481
Crebzf	759.878	-0.288555	0.0979594	-2.94566	0.00322267	0.0373561
Mdn1	300.141	0.435142	0.147729	2.94554	0.00322393	0.0373561
Car8	499.726	-0.353171	0.119948	-2.94435	0.00323629	0.0374693
Ppp3r1	1612.87	0.25766	0.0875192	2.94404	0.00323959	0.0374774
Pygm	27254.9	-0.185709	0.0630942	-2.94336	0.00324668	0.0375294
A930033H14Rik	42.4769	1.0146	0.34496	2.9412	0.00326939	0.0377616
Msto1	284.666	0.495034	0.16838	2.93997	0.00328241	0.0378817
Tspan9	2606.82	0.387329	0.131765	2.93955	0.00328689	0.037903
Syf2	964.115	0.267431	0.0910084	2.93853	0.00329777	0.0379981
Cast	2500.38	0.246479	0.0839061	2.93756	0.00330804	0.038086
Sned1	366.525	-0.391237	0.133237	-2.93641	0.00332035	0.0381972
Tmem161a	1510.07	-0.22641	0.0771195	-2.93583	0.00332659	0.0382386
Ccdc115	363.654	0.363879	0.12402	2.93404	0.0033458	0.0384288
Cd93	2417.88	-0.256885	0.087589	-2.93284	0.00335874	0.038516
Cpxm2	161.992	-0.716533	0.244306	-2.93293	0.00335781	0.038516
A430046D13Rik	299.008	-0.460302	0.156971	-2.9324	0.00336358	0.0385409
Dis3l	763.888	-0.277749	0.0947416	-2.93165	0.00337166	0.0386028
Abcf1	2559.93	0.220526	0.0752328	2.93125	0.003376	0.0386219
Eif3f	3468.42	0.203955	0.0695945	2.93062	0.00338284	0.038648
Sfr1	1160.91	-0.267207	0.09118	-2.93055	0.00338365	0.038648
Sema4d	846.315	0.33797	0.115343	2.93012	0.00338836	0.0386712
Sgca	2361.93	-0.28101	0.0959224	-2.92956	0.00339443	0.03871
Ptp4a2	4705.48	-0.221481	0.0756236	-2.92873	0.00340352	0.0387829
1700030K09Rik	121.065	-0.59037	0.201755	-2.92617	0.0034316	0.0390704
Ptprk	590.797	0.344669	0.117798	2.92594	0.00343417	0.0390704
Gm12319	102.909	-0.622071	0.21278	-2.92354	0.0034608	0.0393114
Mfsd4b1	131.866	0.602228	0.205982	2.92369	0.00345904	0.0393114
Arhgef6	1360.74	0.298374	0.102083	2.92286	0.00346833	0.039366
Plxnb3	77.2439	-0.805553	0.275637	-2.92252	0.00347214	0.0393782
Pno1	558.378	0.433722	0.148454	2.92159	0.0034825	0.0394609
Zc2hc1a	292.414	0.42121	0.144182	2.92138	0.0034849	0.0394609
Gchfr	67.083	0.883381	0.302539	2.91989	0.00350154	0.0395252
Gprasp1	548.466	-0.330427	0.113147	-2.92033	0.00349657	0.0395252
Hspa5	9539.65	-0.353484	0.12106	-2.91991	0.00350129	0.0395252
Rsl24d1	536.558	0.362961	0.124278	2.92055	0.00349413	0.0395252
Slfn9	44.6579	-0.966744	0.331163	-2.91924	0.00350887	0.039577
Dixdc1	212.646	-0.518241	0.177574	-2.91844	0.00351785	0.0396171
Otub2	169.396	0.565246	0.193681	2.91844	0.00351792	0.0396171
Plxdc1	188.013	-0.492178	0.168886	-2.91425	0.00356539	0.0401204
Mpc2	4326.27	-0.233254	0.080074	-2.91298	0.00357993	0.0402526
Rai2	822.745	0.277418	0.0952479	2.91259	0.0035844	0.0402715
Anp32e	1825.35	0.24034	0.0825539	2.91131	0.00359913	0.0403845
F13a1	703.89	-0.42749	0.146847	-2.91113	0.00360129	0.0403845
Hyou1	1161.4	-0.426712	0.146587	-2.91099	0.00360286	0.0403845
Cbr2	297.569	-0.416729	0.143191	-2.91031	0.00361073	0.0404275
Fam117b	664.186	0.926555	0.318388	2.91014	0.00361267	0.0404275
Filip1	1594.29	0.423621	0.145578	2.90993	0.0036151	0.0404275
Gata2	552.689	0.412837	0.142003	2.90725	0.00364616	0.0407433
Atp13a2	763.951	-0.325435	0.111953	-2.9069	0.00365033	0.0407583
Emd	663.409	0.318431	0.109572	2.90614	0.00365914	0.040825
Erdr1	129.405	0.85768	0.295349	2.90395	0.00368486	0.0410802
Hhatl	2873.97	-0.237306	0.0817449	-2.90301	0.00369599	0.0411725
Rsl1d1	1007.47	0.293209	0.101015	2.90262	0.0037005	0.0411909
Oxct1	19383.7	-0.262718	0.0905385	-2.90172	0.00371119	0.041278
Rps19	2766.83	0.241428	0.0832178	2.90116	0.00371781	0.0413198
Ppp2r2a	1030.51	0.266942	0.0920555	2.89979	0.0037341	0.0414689
Flad1	1020.21	-0.250504	0.086444	-2.89788	0.00375691	0.0416902
Zak	3787.26	-0.232861	0.0803726	-2.89727	0.0037643	0.04174
Pf4	158.898	-0.619583	0.213965	-2.89572	0.00378287	0.0419072
Prkcd	409.607	0.358451	0.123795	2.89553	0.00378519	0.0419072
Krt222	437.968	-0.37076	0.128061	-2.89519	0.00378924	0.04192
Eef1e1	182.39	0.543197	0.187814	2.8922	0.00382549	0.0422562
Tpm2	655.706	-0.429269	0.148412	-2.89241	0.003823	0.0422562
Zfp395	505.533	-0.372502	0.128833	-2.89135	0.00383589	0.0423386
Myh14	3300.87	-0.332413	0.114993	-2.89073	0.00384348	0.0423772
Tmem171	38.049	1.07069	0.370437	2.89034	0.0038482	0.0423772
Tmem63b	2371.62	-0.228534	0.0790656	-2.89043	0.00384712	0.0423772
Slc1a5	1145.63	0.328095	0.113572	2.88887	0.00386629	0.0425439
Sdad1	388.918	0.426748	0.147752	2.88826	0.00387374	0.0425644
Stc2	637.509	0.456908	0.158196	2.88824	0.00387405	0.0425644
Rps6ka2	934.25	-0.377589	0.130848	-2.88572	0.00390524	0.0428744
Klhl7	963.99	0.312312	0.108257	2.88491	0.00391522	0.0429187
Rraga	1082.11	0.258374	0.0895579	2.88499	0.00391427	0.0429187
Ly6c1	2508.07	0.283562	0.0983046	2.88453	0.00392003	0.0429387
Fastk	4904.65	-0.203672	0.0706178	-2.88415	0.00392478	0.0429415
Nr4a3	164.562	0.612388	0.212355	2.88379	0.00392921	0.0429415
Sfrp2	220.403	0.517844	0.179568	2.88383	0.00392871	0.0429415
Pmm1	353.563	0.392062	0.135992	2.88298	0.00393935	0.0430197
Ccny	2344.69	0.207406	0.0720096	2.88025	0.00397355	0.0433604
Atat1	161.778	-0.525242	0.182445	-2.87891	0.00399051	0.0435125
Med19	343.748	0.386622	0.134388	2.87691	0.0040159	0.0437563
Anxa6	4636.54	-0.224078	0.077899	-2.87652	0.00402089	0.0437605
Colec12	450.435	-0.336213	0.116886	-2.8764	0.00402235	0.0437605
Dusp10	188.938	-0.583486	0.202925	-2.87538	0.00403547	0.0438702
Abhd17a	1181.31	-0.244465	0.0850659	-2.87384	0.0040552	0.0440183
Fgf11	142.345	-0.640348	0.222813	-2.87393	0.00405404	0.0440183
Man1c1	1291.63	-0.296898	0.1034	-2.87134	0.00408736	0.0443341
RP23-64O4.4	52.103	0.875821	0.30524	2.86929	0.00411394	0.0445888
Ccdc64	118.768	-0.615358	0.21451	-2.86867	0.00412205	0.0446431
Mast4	947.635	0.294203	0.102579	2.86806	0.00412999	0.0446956
4921524J17Rik	347.285	0.453552	0.158184	2.86725	0.00414057	0.0447765
A930004D18Rik	186.443	-0.511576	0.17853	-2.8655	0.00416352	0.0448557
Pdss2	544.337	-0.30018	0.104765	-2.86528	0.00416646	0.0448557
Pkdcc	855.421	-0.358755	0.125212	-2.86517	0.00416779	0.0448557
Ptpn11	5882.32	0.319497	0.111499	2.86547	0.00416394	0.0448557
Rpl22	2451.2	0.218947	0.0764115	2.86537	0.00416518	0.0448557
Tnni3k	2491.27	-0.216864	0.0756689	-2.86596	0.00415749	0.0448557
Ube2k	927.885	0.267394	0.09333	2.86503	0.00416965	0.0448557
Glb1	383.672	-0.371659	0.129738	-2.86469	0.00417421	0.0448712
Mical1	349.579	0.472338	0.164921	2.86403	0.0041829	0.0449311
Mettl1	228.976	0.456044	0.159263	2.86347	0.00419024	0.0449765
Hspd1	6830.02	-0.206504	0.0721433	-2.86242	0.00420422	0.0450595
Neurl4	1413.89	-0.233476	0.0815602	-2.86262	0.00420155	0.0450595
Gbp3	411.026	-0.415034	0.145035	-2.86162	0.00421487	0.0450883
Med15	817.21	0.284525	0.0994319	2.86151	0.00421629	0.0450883
Parp10	499.175	-0.349652	0.122185	-2.86167	0.00421409	0.0450883
Akt2	4626.52	-0.210049	0.0734111	-2.86126	0.00421954	0.0450897
Spred2	950.578	0.266656	0.0932133	2.86071	0.004227	0.0451359
Sema7a	1347.61	0.273577	0.0957087	2.85843	0.00425745	0.0454275
Xpc	424.764	0.347897	0.121767	2.85707	0.00427566	0.0455881
Ndufa11	4619.97	0.202779	0.0709805	2.85683	0.00427895	0.0455895
Tfdp2	1611.34	0.308869	0.108154	2.85582	0.00429259	0.0456864
Ucp2	2403.12	-0.431326	0.151041	-2.85569	0.00429439	0.0456864
Ydjc	60.0061	0.849293	0.297436	2.85538	0.0042985	0.0456965
Mcee	722.32	-0.278595	0.0975862	-2.85486	0.00430564	0.0457387
Tapt1	724.78	0.294749	0.103265	2.85428	0.00431342	0.0457877
Ramp1	249.601	0.522143	0.182953	2.85398	0.00431758	0.0457981
Arl14ep	309.793	0.400314	0.140357	2.85211	0.00434307	0.0460346
Cpn2	62.3941	-0.793672	0.27831	-2.85176	0.00434783	0.0460512
Rasef	30.7935	1.34013	0.470024	2.8512	0.0043554	0.0460976
Gfpt1	551.967	0.30689	0.107781	2.84735	0.00440842	0.0465904
Pwp1	394.099	0.458951	0.161179	2.84746	0.00440697	0.0465904
Mcu	407.431	0.370652	0.130192	2.84697	0.00441377	0.0466128
Mief2	799.136	-0.315481	0.110829	-2.84656	0.00441949	0.046639
Osmr	538.763	0.373271	0.131162	2.84589	0.0044288	0.0467031
Fry	1977.17	0.322759	0.113454	2.84485	0.00444326	0.0467872
Mir99ahg	210.666	0.444427	0.15621	2.84505	0.0044404	0.0467872
Uri1	573.199	0.327652	0.115253	2.84288	0.00447072	0.0470421
Gm14453	31.7974	1.11494	0.392255	2.84238	0.00447774	0.0470816
Alyref2	20.2581	1.37541	0.4845	2.83882	0.00452808	0.0475762
Bmpr2	1808.54	0.260271	0.0917357	2.83719	0.00455129	0.0477853
Rplp1	7471.71	0.174208	0.0614132	2.83666	0.00455883	0.0478296
Gm13479	40.4771	-1.04714	0.369179	-2.83639	0.00456264	0.0478348
Vwa7	324.015	-0.412263	0.145362	-2.83612	0.00456653	0.0478407
Emp2	1814.88	0.23726	0.0836687	2.83571	0.00457246	0.0478681
Fmo1	1128.72	0.32027	0.112973	2.83493	0.00458364	0.0479504
Mllt6	3891.42	-0.267313	0.0943824	-2.83224	0.00462235	0.0483203
Rack1	6448.86	0.203977	0.0721009	2.82905	0.00466865	0.048769
Insig2	1030.8	0.243552	0.0860971	2.82881	0.00467218	0.0487706
6330403L08Rik	617.595	-0.292694	0.103496	-2.82808	0.00468279	0.0488459
Fam98a	835.054	0.297729	0.105326	2.82673	0.00470259	0.0489463
Lrrc4b	574.017	0.408032	0.144325	2.82717	0.00469613	0.0489463
Rhob	5975.34	0.278326	0.0984562	2.8269	0.00470005	0.0489463
Serpina3n	194.167	0.748892	0.265005	2.82595	0.00471401	0.0490298
Lman1l	12.2139	1.96116	0.694098	2.82548	0.00472098	0.0490669
Scrib	1049.88	-0.245554	0.0869248	-2.8249	0.00472954	0.0491205
Gkn3	15.5917	-1.62773	0.576399	-2.82397	0.00474335	0.0492284
Plscr2	569.364	0.462767	0.163927	2.82301	0.00475748	0.0493396
Higd2a	1159.64	0.260657	0.0923437	2.82268	0.00476236	0.0493547
Ctla2a	265.675	0.390708	0.138535	2.82028	0.00479823	0.049672
Rad23b	2524.65	0.218994	0.0776528	2.82017	0.00479986	0.049672
Fxr2	2889.5	-0.221642	0.0786235	-2.81903	0.00481687	0.0497404
Hmg20b	1169.76	-0.25161	0.0892599	-2.81885	0.00481965	0.0497404
Nrg1	31.1866	1.41979	0.503677	2.81885	0.00481964	0.0497404
Smc1a	1023.24	-0.261108	0.0926307	-2.81881	0.00482026	0.0497404
Fam162a	1490.97	0.253564	0.0899861	2.81781	0.0048352	0.0498589
Irx5	304.044	0.543011	0.192723	2.81757	0.0048389	0.0498614
Isyna1	639.773	-0.43646	0.154943	-2.81692	0.00484873	0.0498992
Vldlr	6492.94	0.258075	0.0916176	2.81687	0.00484948	0.0498992
Mrps18a	827.816	-0.280615	0.0996779	-2.81522	0.00487433	0.0501191
Gm38102	132.505	-0.578539	0.205552	-2.81456	0.00488447	0.0501876
Stard5	173.547	0.489045	0.173827	2.8134	0.00490211	0.0502972
Zfp91	2671.24	-0.199904	0.0710509	-2.81353	0.00490001	0.0502972
Metrnl	292.013	-0.447921	0.159248	-2.81273	0.00491234	0.0503663
Tpi1	12551.9	0.164835	0.0586108	2.81238	0.00491771	0.0503855
Mylip	686.255	0.372004	0.132314	2.81153	0.00493066	0.0504551
Wnk1	7784.95	-0.282559	0.100502	-2.81148	0.00493149	0.0504551
Spsb4	208.109	0.683107	0.243029	2.8108	0.00494184	0.0505251
Rragb	69.0603	0.784921	0.279289	2.81042	0.00494767	0.0505489
Uqcrc1	26348.8	-0.209211	0.0744491	-2.81013	0.00495222	0.0505596
Rpl15	3793.72	0.244313	0.0870521	2.80651	0.00500806	0.0510936
Lin7c	1010.37	0.24913	0.0887797	2.80616	0.00501357	0.0511136
Hrct1	91.8677	0.691686	0.246525	2.80575	0.00501994	0.0511424
H2afv	808.103	-0.330948	0.117966	-2.80546	0.00502447	0.0511525
Adarb1	778.097	0.288888	0.10299	2.80501	0.00503152	0.051188
Ddc	118.445	-0.750419	0.267642	-2.80382	0.00505014	0.0513051
Nsun3	173.07	0.49974	0.178224	2.804	0.00504736	0.0513051
Cyr61	1293.83	0.422759	0.150797	2.8035	0.00505513	0.0513197
Pes1	709.349	0.318129	0.113487	2.80322	0.00505957	0.0513287
Hsf4	100.065	-0.588831	0.210073	-2.80298	0.0050633	0.0513304
Dhx16	725.253	-0.27485	0.0981116	-2.8014	0.00508813	0.0515098
Slc36a4	274.334	0.412908	0.147388	2.80151	0.00508647	0.0515098
Fndc1	848.472	-0.425837	0.15205	-2.80065	0.00510001	0.0515938
Msi2	3142.7	0.194298	0.069397	2.7998	0.00511344	0.0516934
Hadh	9404.41	-0.207764	0.0742179	-2.79938	0.00512007	0.0517241
Cobl	216.689	0.444618	0.15888	2.79844	0.00513495	0.0518382
Atp6v1e1	1936.47	0.2522	0.090176	2.79675	0.00516187	0.0520735
Wif1	257.087	-0.691949	0.247457	-2.79624	0.00517008	0.0521199
Arhgef37	73.3183	0.995796	0.356259	2.79515	0.00518764	0.0522604
Mtdh	1405.4	0.229054	0.0819679	2.79443	0.0051991	0.0523028
Trim25	1234.8	0.311604	0.111503	2.79458	0.00519667	0.0523028
Kif1b	3904.01	-0.202419	0.0724869	-2.79249	0.00523034	0.0525805
Gbp4	445.924	-0.399119	0.142968	-2.79167	0.00524367	0.0526777
Strn	998.05	0.301181	0.1079	2.7913	0.00524962	0.0527008
Pcm1	962.963	0.277115	0.0992903	2.79096	0.00525526	0.0527207
Acot9	415.677	0.326526	0.117075	2.78904	0.00528644	0.0529966
Eef1d	2597.6	0.194607	0.0697881	2.78854	0.00529466	0.0530422
Tspan15	277.177	-0.394566	0.14156	-2.78727	0.00531539	0.0532129
Dbp	4387.41	-0.723444	0.259601	-2.78675	0.00532389	0.0532611
Trdn	3613.43	-0.215047	0.0771967	-2.78571	0.00534112	0.0533964
Gm37691	165.664	-0.519944	0.186681	-2.78521	0.00534934	0.0534415
Frmd5	3579.94	0.685207	0.246077	2.78453	0.00536061	0.0535171
Pgam2	8599.57	0.186685	0.0670616	2.78379	0.00537279	0.0535931
Tanc1	1028.43	0.276371	0.0992899	2.78347	0.00537806	0.0535931
Trim24	821.391	0.278677	0.100121	2.78339	0.00537938	0.0535931
Necap1	462.481	0.331699	0.119211	2.78245	0.0053951	0.0537127
Pcx	886.044	-0.315231	0.113415	-2.77946	0.00544494	0.0541715
Col4a3	148.801	0.69736	0.250949	2.7789	0.00545441	0.0542284
Brd9	693.65	-0.273898	0.098578	-2.77849	0.00546125	0.054259
Scamp5	333.792	0.434087	0.156266	2.77788	0.00547148	0.0543232
C1d	524.691	0.303742	0.109374	2.77709	0.00548479	0.0543805
Cmtm8	217.062	-0.459197	0.16535	-2.77712	0.00548422	0.0543805
Prmt1	1227.14	0.239818	0.0864069	2.77545	0.0055125	0.0546177
Rpl39	1189.77	0.242613	0.0874359	2.77475	0.00552436	0.0546976
Cd72	43.4625	-1.06986	0.385674	-2.77402	0.00553691	0.0547293
Sdf2l1	121.062	-0.634176	0.228606	-2.77411	0.00553537	0.0547293
Spen	1286.56	0.248506	0.0895873	2.7739	0.00553894	0.0547293
Pnkd	1673.52	0.282513	0.101944	2.77125	0.00558419	0.0551009
Slc16a7	135.517	-0.62092	0.224051	-2.77133	0.00558273	0.0551009
Srf	3563.47	0.26186	0.0945217	2.77036	0.00559938	0.055213
Mcat	711.93	-0.292165	0.105475	-2.76999	0.00560582	0.0552388
Gm9905	110.763	-0.572947	0.206962	-2.76837	0.00563367	0.0554753
Gm29237	366.485	0.354706	0.128255	2.76564	0.0056811	0.0559042
Trappc5	703.109	-0.300789	0.108779	-2.76513	0.00568999	0.0559535
Ppargc1a	2284.97	0.353044	0.127696	2.76472	0.00569721	0.0559864
Ptms	3197.58	-0.236894	0.0857024	-2.76415	0.00570717	0.0560461
Esrrg	872.562	0.275466	0.0996716	2.76374	0.00571435	0.0560783
Fam132a	237.672	-0.407605	0.147525	-2.76296	0.00572799	0.056174
Tagln3	18.7452	-1.53471	0.555786	-2.76133	0.00575662	0.0564164
Got1	17715.6	0.232458	0.0841975	2.76087	0.00576476	0.0564211
Ppp1r14b	727.313	0.275786	0.0998976	2.76069	0.00576796	0.0564211
Tor1aip1	1974.77	-0.218574	0.079175	-2.76064	0.00576883	0.0564211
Errfi1	581.231	1.00794	0.365283	2.75935	0.00579162	0.0566057
Galnt15	1148.86	0.279951	0.101476	2.75878	0.00580168	0.0566656
Otud6b	1228.42	-0.239074	0.0867031	-2.75738	0.00582663	0.0568708
Lrif1	289.846	0.388248	0.140852	2.75644	0.00584351	0.0569601
Wipf3	1191.9	0.349673	0.126857	2.75643	0.00584368	0.0569601
Tmem88	522.379	-0.365058	0.132474	-2.75569	0.00585688	0.0570502
Naca	13075.5	0.191369	0.0694531	2.75537	0.00586255	0.0570669
Abl1	2138.98	-0.279278	0.101369	-2.75506	0.00586814	0.0570828
Hnrnpa1	2620.99	0.198843	0.0722627	2.75167	0.00592927	0.0576386
Map3k11	1214.32	-0.234362	0.0852149	-2.75024	0.00595512	0.057812
Rab24	827.973	-0.250115	0.0909381	-2.75038	0.00595254	0.057812
Bicd1	122.663	0.58328	0.212103	2.74999	0.0059597	0.0578175
Paip2	2362.44	-0.221888	0.0806955	-2.7497	0.005965	0.0578301
Bop1	592.531	0.319808	0.116388	2.74778	0.00599996	0.0581299
Stx4a	1116.01	-0.236685	0.0861647	-2.74689	0.00601634	0.0582495
Dhdds	702.593	-0.293724	0.106954	-2.74626	0.00602789	0.0583221
B430219N15Rik	11.8019	-1.92818	0.702497	-2.74476	0.0060556	0.0584865
Gm11730	43.9953	0.992831	0.36173	2.74468	0.00605703	0.0584865
Stard3	633.722	-0.318427	0.116008	-2.74486	0.00605371	0.0584865
Fktn	698.041	-0.345113	0.125781	-2.74377	0.00607388	0.0586099
Egln1	9658.36	-0.201533	0.0734585	-2.7435	0.00607885	0.0586187
2410018L13Rik	20.7273	1.33586	0.487147	2.74221	0.00610266	0.0587491
Gm10263	24.3171	1.25976	0.459355	2.74245	0.00609833	0.0587491
Mga	750.985	0.264917	0.0966172	2.74192	0.00610805	0.0587491
Pwp2	526.131	0.290718	0.106037	2.74167	0.00611272	0.0587491
Rpl29	2953.32	0.198151	0.0722737	2.74167	0.00611274	0.0587491
Trnp1	76.1695	0.983428	0.358765	2.74115	0.00612247	0.0588034
Gabrr2	21.304	-1.27955	0.466856	-2.74078	0.00612945	0.0588313
Mkrn1	613.096	0.293498	0.107105	2.7403	0.00613836	0.0588777
Emilin1	1206.58	-0.280544	0.102396	-2.7398	0.00614766	0.0589277
Txlnb	11391.7	-0.197164	0.071971	-2.73949	0.00615345	0.058944
Art3	5575.79	0.656997	0.239971	2.73781	0.00618489	0.0592058
Ecm1	1032.47	-0.306181	0.111859	-2.73719	0.00619663	0.0592397
Hadhb	23567.5	-0.168037	0.0613874	-2.73732	0.00619416	0.0592397
Man2a2	2057.44	-0.253382	0.0925963	-2.73642	0.00621115	0.0593391
Efemp1	61.4907	-0.916157	0.334932	-2.73535	0.0062314	0.0594932
Rin2	807.222	-0.341474	0.124896	-2.73408	0.00625548	0.0596836
Prpf19	5731.19	0.221702	0.0811098	2.73335	0.0062693	0.0597364
Syngr1	1381.77	0.244708	0.0895225	2.73348	0.00626696	0.0597364
Gm29216	8840.27	0.869876	0.318288	2.73298	0.00627641	0.0597421
Taf9b	292.473	0.36746	0.134458	2.73289	0.00627818	0.0597421
Lima1	862.466	-0.268768	0.0984696	-2.72946	0.00634388	0.0603275
Gpr155	377.494	-0.413868	0.15172	-2.72784	0.00637505	0.060584
Trim47	1159.46	0.321209	0.117765	2.72754	0.00638077	0.0605984
Cfdp1	400.399	-0.340719	0.124957	-2.72669	0.00639734	0.0607158
Palld	6715.66	0.227883	0.0835944	2.72605	0.00640965	0.0607527
Smarcc2	2491.81	-0.204576	0.0750401	-2.72623	0.00640623	0.0607527
Abca8b	448.752	-0.350558	0.128611	-2.72573	0.00641598	0.0607728
Rasgrp2	1254.02	0.356716	0.130911	2.72487	0.0064326	0.0608902
Dnajc11	1476.41	0.34576	0.126919	2.72426	0.00644464	0.0609642
Ryk	1123.81	0.273538	0.10045	2.72312	0.00646682	0.0611339
Scaf8	923.03	0.25816	0.0948378	2.72212	0.00648654	0.0612801
Setd7	2059.33	0.244492	0.0898368	2.72151	0.00649842	0.0613522
Eif1a	375.049	0.411074	0.151061	2.72124	0.00650378	0.0613627
Rgs6	616.655	-0.324263	0.119189	-2.72057	0.0065169	0.0614463
Negr1	80.1241	-0.648317	0.238355	-2.71997	0.00652883	0.0615186
Lipo3	182.938	0.455312	0.16742	2.71958	0.00653654	0.0615494
Rad21	2042.44	-0.233344	0.085808	-2.71937	0.00654063	0.0615494
Gm6472	557.905	0.311698	0.114696	2.7176	0.00657577	0.0618396
Clk1	1903.76	0.224463	0.0826198	2.71682	0.00659119	0.0619443
Abca7	633.803	-0.293784	0.108166	-2.71606	0.00660636	0.0619602
Efna5	308.208	0.385613	0.141985	2.71588	0.00661006	0.0619602
Kifc3	2166.91	0.244596	0.0900567	2.71602	0.00660718	0.0619602
Tagln	1069.64	-0.363171	0.133712	-2.71608	0.00660596	0.0619602
Rbck1	1386.5	-0.230732	0.0849684	-2.7155	0.00661756	0.0619902
Adsl	1500.08	0.231803	0.0854358	2.71318	0.00666401	0.062304
Chrna10	37.0121	-1.1958	0.440733	-2.71321	0.00666348	0.062304
Maea	2022.89	0.297622	0.109693	2.71321	0.00666342	0.062304
Pik3r1	3144.94	0.342807	0.126433	2.71137	0.00670067	0.0626061
Mtus1	3857.45	0.224314	0.0827581	2.71047	0.00671874	0.0626551
Nit1	427.778	-0.333231	0.122927	-2.7108	0.00671206	0.0626551
Nrd1	3718.05	-0.185588	0.0684711	-2.71046	0.00671894	0.0626551
Nod1	808.196	-0.276891	0.102186	-2.70967	0.00673502	0.0627645
Bcat1	35.3431	1.02933	0.379987	2.70885	0.00675173	0.0628474
Dsp	22228.7	0.207266	0.0765157	2.7088	0.00675263	0.0628474
Ccdc189	88.1448	-0.712894	0.263331	-2.70721	0.00678509	0.0631087
Khsrp	1441.09	-0.211722	0.0782177	-2.70683	0.00679296	0.0631413
Nt5c3	1038.22	0.232259	0.0858187	2.70639	0.00680192	0.0631838
Csrp2bp	531.72	-0.319024	0.117917	-2.70549	0.00682046	0.0633152
Zfp651	3358.63	-0.215623	0.0797651	-2.70322	0.00686714	0.0637076
Isoc1	1332.13	-0.26113	0.0966088	-2.70296	0.00687244	0.0637158
Rchy1	611.012	0.274967	0.101758	2.70216	0.00688915	0.0637887
Tnfsf10	472.312	-0.432	0.15986	-2.70236	0.00688491	0.0637887
Gstm2	1534.53	-0.264392	0.0978786	-2.70122	0.00690855	0.0639273
Nebl	5781.76	0.203261	0.075265	2.7006	0.00692141	0.0640053
Ntrk3	32.821	-1.15125	0.426546	-2.69901	0.00695464	0.0642713
Fuz	225.029	-0.4085	0.151372	-2.69864	0.00696225	0.0642875
Phf24	205.59	0.567893	0.21046	2.69835	0.00696852	0.0642875
Rpl6l	355.356	0.334076	0.12382	2.69807	0.00697421	0.0642875
Utp18	266.367	0.463019	0.171599	2.69827	0.00697012	0.0642875
Tmem242	1075.4	-0.263085	0.097542	-2.69715	0.00699367	0.0644258
Ttn	75057.4	0.200219	0.0742643	2.69603	0.00701705	0.0645998
Mbnl2	4175.76	0.22674	0.0841287	2.69516	0.00703548	0.0647282
Cryba4	106.36	-0.600412	0.222816	-2.69465	0.00704623	0.0647858
Igf2bp2	118.038	0.649321	0.241004	2.69423	0.00705511	0.0648051
Mis12	195.472	-0.473561	0.175775	-2.69413	0.00705732	0.0648051
Mrpl36	542.127	-0.297892	0.110585	-2.69377	0.00706493	0.0648338
Lrrc1	521.952	0.299156	0.111067	2.69347	0.00707132	0.0648512
Eps8	353.932	0.453124	0.168259	2.69302	0.00708086	0.0648974
Rps8	4628.12	0.188732	0.0700965	2.69247	0.00709256	0.0649634
Tmem256	515.357	-0.343389	0.127682	-2.6894	0.00715796	0.0655208
Msl1	2287.96	-0.231376	0.0860592	-2.68857	0.00717593	0.0656436
Cd248	561.067	-0.436269	0.162288	-2.68823	0.00718311	0.0656677
Rxfp1	26.1215	-1.87925	0.69912	-2.68802	0.00718767	0.0656677
Mfge8	3815.44	0.200878	0.0747794	2.68628	0.00722529	0.0659697
Gle1	674.234	-0.26754	0.0996689	-2.68429	0.00726841	0.0663213
Tecrl	1047.62	0.28594	0.10658	2.68286	0.00729954	0.0665633
Ranbp6	440.406	-0.312442	0.11651	-2.68167	0.0073255	0.0667579
Rpl17	3060.18	0.18912	0.0705379	2.68111	0.00733789	0.0668286
Eef1g	5864.25	0.249013	0.0928949	2.68059	0.00734927	0.0668478
Rasl11b	893.384	0.297364	0.110928	2.68069	0.00734702	0.0668478
Il34	122.072	0.633223	0.236384	2.67879	0.00738894	0.0671662
Fkrp	1362.12	-0.231823	0.0865507	-2.67846	0.00739614	0.0671808
Snrpd3	670.658	0.295566	0.110356	2.67829	0.00739986	0.0671808
Sel1l3	25.7952	-1.49706	0.559046	-2.67788	0.00740888	0.0672204
H2afz	690.61	-0.26236	0.0980025	-2.67707	0.00742682	0.0673408
Klhl2	351.834	0.364613	0.136252	2.67602	0.00745019	0.0675104
Rpl36al	1018.36	0.286487	0.107071	2.67568	0.00745784	0.0675373
Esrrb	764.674	0.372006	0.139044	2.67545	0.00746296	0.0675412
Fubp1	1327.1	0.232035	0.0867459	2.67488	0.00747561	0.0676133
Alas2	41.7407	-1.01107	0.37809	-2.67416	0.00749165	0.0677159
Efcab2	2032.13	-0.285782	0.106886	-2.67371	0.00750171	0.0677644
Eea1	723.472	0.292964	0.109711	2.67032	0.00757794	0.0683857
Pcp4l1	3885.82	-0.315849	0.118285	-2.67023	0.00757998	0.0683857
Pkp4	2610.94	0.249151	0.093349	2.66902	0.00760719	0.0685646
Poll	253.446	-0.403561	0.151207	-2.66893	0.00760931	0.0685646
Lrrc16a	110.344	0.585319	0.219366	2.66823	0.00762524	0.0686652
Guk1	1187.43	0.239319	0.0897061	2.66781	0.0076348	0.0687084
Angptl2	3243.15	-0.236446	0.0886572	-2.66697	0.00765387	0.0688371
Ptprm	2795.23	0.19028	0.0713556	2.66664	0.00766132	0.0688612
Prrc2c	1289.39	0.244315	0.0916331	2.66623	0.00767064	0.0689021
Rac1	3930.12	0.193435	0.0725643	2.66571	0.00768267	0.0689672
Batf2	24.151	-1.21577	0.456172	-2.66517	0.00769506	0.0690182
Phka2	381.952	-0.376823	0.141395	-2.66504	0.00769792	0.0690182
Polrmt	1014.08	-0.233865	0.0877652	-2.66466	0.00770654	0.0690525
Dctn6	805.807	0.262865	0.0987092	2.66303	0.00774408	0.0692169
Dnmt1	592.743	-0.280088	0.105163	-2.66337	0.00773619	0.0692169
Spc24	58.1358	-0.78653	0.295335	-2.66318	0.00774059	0.0692169
Tmem52	32.931	1.02775	0.385924	2.66309	0.00774265	0.0692169
Acer2	576.49	0.472566	0.177525	2.66197	0.0077684	0.0693913
Retsat	991.855	-0.314264	0.118126	-2.66041	0.00780457	0.0696712
Spon2	42.7076	-1.23133	0.462927	-2.65989	0.00781672	0.0697366
Rin3	600.748	0.379989	0.142895	2.65923	0.00783201	0.0698298
Syne1	1841.35	0.268595	0.101036	2.65841	0.00785097	0.0699556
2810006K23Rik	258.927	-0.398917	0.150178	-2.6563	0.00790037	0.0703523
Amn1	125.607	0.587299	0.221219	2.65484	0.0079347	0.0705274
Bcl3	117.577	-0.565733	0.21308	-2.65503	0.00793014	0.0705274
Gas7	280.764	-0.382342	0.144016	-2.65485	0.0079344	0.0705274
Gata6	2045.58	0.215113	0.0810485	2.65412	0.00795146	0.0705894
H2afy2	196.546	0.446062	0.168061	2.65416	0.00795068	0.0705894
Hnrnpdl	1940.17	-0.242057	0.0912137	-2.65374	0.00796058	0.0706269
Chka	288.286	0.46189	0.174121	2.65269	0.00798527	0.0708024
B3galnt1	54.249	-0.76586	0.288837	-2.65153	0.00801274	0.0710023
Atp9a	2065.76	0.217701	0.0821166	2.65112	0.00802257	0.0710458
Tubb2b	81.4453	0.830477	0.313297	2.65076	0.00803102	0.071077
Ndufa6	2678.47	-0.206818	0.0780649	-2.64931	0.0080657	0.0713401
Col4a2	13391.8	0.23501	0.0887189	2.64893	0.00807477	0.0713766
Ace	1820.36	0.225689	0.085213	2.64853	0.00808435	0.0714176
Trio	1077.3	0.233685	0.0882979	2.64655	0.00813172	0.071792
Dab2	836.047	-0.336508	0.127167	-2.64619	0.00814029	0.0718238
Vcl	1883.01	0.259997	0.0982634	2.64591	0.00814705	0.0718395
Btbd2	1151.1	-0.243408	0.0920379	-2.64465	0.00817766	0.071982
Gzmm	135.796	-0.526036	0.198882	-2.64496	0.00817001	0.071982
Ndufaf6	288.354	0.388307	0.146829	2.64462	0.00817819	0.071982
Anxa3	587.618	0.299182	0.113172	2.64361	0.00820278	0.0721105
Dock8	321.376	-0.453081	0.171376	-2.64378	0.00819858	0.0721105
Sesn1	3018.77	0.368604	0.139456	2.64315	0.0082138	0.0721392
Slc25a27	132.677	0.495734	0.187561	2.64306	0.00821604	0.0721392
Cdyl2	138.739	0.493137	0.186593	2.64284	0.00822127	0.0721412
4930523C07Rik	408.697	0.4592	0.173983	2.63934	0.00830686	0.0728478
Hist1h4h	214.736	0.439169	0.166438	2.63864	0.00832397	0.0729175
Slc25a11	9346.15	-0.221475	0.0839365	-2.6386	0.0083249	0.0729175
Gk	727.681	0.276148	0.104678	2.63808	0.00833768	0.0729408
Zdhhc5	2500.51	0.229958	0.0871664	2.63815	0.00833603	0.0729408
Ttll7	185.918	0.46902	0.17783	2.63747	0.0083528	0.0730288
Helt	19.6076	-1.48107	0.561928	-2.6357	0.00839639	0.073321
Qrsl1	572.574	0.285644	0.108367	2.63589	0.00839161	0.073321
Rpl13	8200.9	0.165396	0.0627631	2.63524	0.00840787	0.0733325
Tmem9b	747.661	0.27326	0.103693	2.63528	0.00840676	0.0733325
Tusc3	476.818	0.292394	0.110987	2.6345	0.0084262	0.073448
Gm5559	6203.52	0.217996	0.0827648	2.63392	0.00844049	0.0735281
Gm16418	492.91	-0.304295	0.115611	-2.63205	0.00848716	0.07389
1700020I14Rik	6296.02	0.164808	0.0626273	2.63157	0.00849922	0.0739504
Rac2	88.1015	-0.657158	0.249746	-2.63131	0.00850574	0.0739625
Aldh1a2	89.4524	-0.664494	0.252589	-2.63074	0.00852003	0.0739976
Nfic	5709.03	-0.251028	0.0954152	-2.6309	0.00851597	0.0739976
Irx2	135.678	-0.64188	0.244153	-2.62901	0.00856334	0.0742843
Nptn	1762.61	-0.222028	0.0844514	-2.62906	0.00856218	0.0742843
Gatb	836.761	-0.260745	0.099198	-2.62853	0.00857541	0.0743442
Zfpm2	463.54	0.327055	0.12446	2.62778	0.00859433	0.0744636
Mrpl48	767.236	-0.330095	0.125808	-2.62379	0.00869571	0.0752967
Sertad4	246.377	-0.527972	0.201395	-2.62157	0.00875262	0.075744
Hspa12b	1370.66	0.226423	0.0863807	2.62122	0.00876156	0.075776
mt-Tn	1584.14	-0.405562	0.154736	-2.621	0.00876732	0.0757803
Supt6	1567.67	0.275452	0.105105	2.62073	0.00877422	0.0757946
Hn1	1354.28	0.244014	0.0931973	2.61825	0.0088381	0.0763007
Aff2	21.99	-1.37066	0.523961	-2.61597	0.00889755	0.076768
Uck1	478.471	-0.291871	0.111624	-2.61477	0.00892867	0.0769904
Gm15626	15.8811	1.66804	0.63799	2.61452	0.00893523	0.077001
5031425E22Rik	306.39	-0.362677	0.138804	-2.61288	0.00897838	0.0773167
Btbd1	3680.84	0.198148	0.0758459	2.61251	0.00898795	0.0773167
Kank2	3038.47	-0.248843	0.0952451	-2.61265	0.00898422	0.0773167
Rpl37	1521.09	0.210838	0.0807121	2.61222	0.00899554	0.0773359
2023-03-05	1657.61	0.260359	0.0996991	2.61145	0.00901602	0.0774658
Fgd4	498.841	-0.322725	0.123699	-2.60895	0.00908192	0.0779472
Psmd4	1778.51	0.219016	0.083949	2.60892	0.00908285	0.0779472
Apol10b	131.849	-0.62428	0.239344	-2.60829	0.00909959	0.0780072
Nkx2-5	1879.15	-0.233875	0.0896729	-2.60809	0.00910492	0.0780072
Wdr24	346.488	-0.325157	0.124675	-2.60805	0.00910607	0.0780072
Pon2	816.979	0.265004	0.101643	2.6072	0.00912854	0.0781533
Rps15	4643.45	0.173942	0.0667215	2.60698	0.00913448	0.0781577
Akap8l	1111.72	0.248345	0.0953029	2.60585	0.00916474	0.0782986
Csnk1d	1864.96	0.199771	0.0766753	2.60542	0.00917628	0.0782986
Pdia4	720.058	-0.276654	0.10617	-2.60577	0.00916685	0.0782986
Phf14	640.493	-0.275631	0.105791	-2.60543	0.00917588	0.0782986
Tm9sf2	3682.4	0.1812	0.0695491	2.60535	0.00917808	0.0782986
Igfals	59.3926	-0.920243	0.35372	-2.60162	0.00927859	0.0791093
Flna	4555.24	-0.216094	0.0830902	-2.60072	0.00930289	0.0792696
Tma7	620.677	-0.26213	0.10082	-2.59999	0.00932269	0.0793915
Tmem41a	226.335	-0.385478	0.148288	-2.59953	0.00933527	0.0794517
Ctsa	2866.22	-0.183003	0.070438	-2.59807	0.0093749	0.079695
Slmap	4031.3	0.229978	0.0885181	2.59809	0.0093745	0.079695
Sptbn1	16813.4	0.187026	0.0720079	2.5973	0.0093959	0.0798264
Lingo3	252.222	-0.550775	0.21218	-2.59578	0.00943752	0.0801328
Rhbdd3	468.333	-0.296602	0.114286	-2.59525	0.00945211	0.0802095
Park7	2175.4	-0.195469	0.0753264	-2.59496	0.00946006	0.0802298
Tmem43	831.787	0.267754	0.103239	2.59352	0.0094998	0.0805195
Adgrl1	857.076	-0.323277	0.124665	-2.59317	0.00950969	0.080556
Arel1	1333.25	-0.300125	0.115755	-2.59277	0.00952071	0.080602
Klhdc8a	626.932	0.404919	0.156398	2.58902	0.00962488	0.0814361
Cdc26	380.261	-0.329452	0.127375	-2.58647	0.00969656	0.0819465
Plcb3	720.919	-0.249318	0.096388	-2.58661	0.00969241	0.0819465
Mospd3	310.043	-0.355234	0.137357	-2.5862	0.00970402	0.0819614
Tes	80.7821	0.749622	0.289938	2.58546	0.00972497	0.0820904
Rer1	1466.11	0.228695	0.0884847	2.58457	0.00974996	0.0822532
Foxp4	515.994	-0.355146	0.137587	-2.58124	0.00984451	0.0830023
Myo1c	4273.15	0.182209	0.0706044	2.58071	0.00985981	0.0830342
Myo1f	114.484	-0.585487	0.22687	-2.58072	0.00985956	0.0830342
Napsa	11.3088	1.79742	0.696734	2.57978	0.00988623	0.0830657
Pdpk1	1035.42	0.235303	0.0912169	2.5796	0.00989141	0.0830657
Ptprn	141.791	0.520167	0.201624	2.57988	0.00988343	0.0830657
Ryr2	23957.3	-0.227611	0.0882173	-2.58011	0.00987679	0.0830657
Slc25a29	254.076	-0.475691	0.184407	-2.57957	0.00989234	0.0830657
Plbd1	769.343	-0.293461	0.113773	-2.57935	0.00989869	0.0830707
Hnrnpm	2557.19	0.189828	0.0736613	2.57703	0.00996522	0.0835318
Ptbp2	484.31	0.328404	0.12743	2.57713	0.00996231	0.0835318
Tbc1d1	529.665	-0.450367	0.174818	-2.57621	0.0099889	0.0836817
Gtf2e2	229.881	0.426674	0.165682	2.57525	0.0100167	0.0838659
Flt1	3224.62	0.18896	0.0734067	2.57416	0.0100484	0.084034
Vipas39	616.145	-0.273708	0.106323	-2.5743	0.0100444	0.084034
Smg1	1418.26	0.232098	0.0902269	2.57239	0.0101	0.0844166
Cox6a1	1836.53	-0.214645	0.0834568	-2.57193	0.0101133	0.0844784
Adrb1	746.137	-0.331451	0.128944	-2.5705	0.0101553	0.0847799
Fam220a	1180.44	-0.219448	0.0853966	-2.56975	0.0101773	0.0848654
Mkl2	781.238	0.322667	0.125563	2.56977	0.0101767	0.0848654
Xbp1	1517.72	-0.291275	0.113424	-2.56802	0.010228	0.0852395
Pparg	197.374	0.443491	0.172745	2.56732	0.0102488	0.0853635
Gm10275	554.294	0.271368	0.105812	2.56463	0.0103286	0.0859783
2310016G11Rik	30.4776	-1.06716	0.416156	-2.56432	0.0103378	0.0860052
Cnih1	977.15	0.24269	0.0946672	2.56361	0.0103591	0.0861326
Lrp5	2285.2	0.205612	0.0802286	2.56283	0.0103823	0.0862759
Eci1	4243.74	-0.241841	0.0943854	-2.56228	0.0103988	0.0863636
Ttc28	995.639	0.243222	0.0949384	2.5619	0.0104102	0.0864082
Ahsg	77.2754	0.874249	0.341361	2.56107	0.0104352	0.0865656
Ryr3	27.8085	-1.08523	0.423777	-2.56085	0.0104418	0.0865707
Gcn1l1	2127.15	0.190444	0.0743768	2.56053	0.0104513	0.0866002
Ankrd52	1899.12	0.257942	0.100787	2.55928	0.010489	0.0868626
Chmp2b	914.356	0.260748	0.101912	2.55857	0.0105105	0.0869905
Hibch	1141.28	-0.219729	0.0859164	-2.55748	0.0105434	0.0871627
Stxbp3	408.39	0.334364	0.130739	2.5575	0.0105429	0.0871627
Gpd1l	1746.81	0.240153	0.0939244	2.55688	0.0105617	0.0872141
Magix	624.816	-0.309138	0.120896	-2.55706	0.010556	0.0872141
Cyth4	227.698	-0.423428	0.165646	-2.55622	0.0105816	0.0873282
Mark4	905.277	-0.261337	0.102253	-2.55577	0.0105952	0.0873569
Prkaa2	2597.17	0.211042	0.0825767	2.55571	0.0105972	0.0873569
Als2cl	774.205	0.252468	0.0988062	2.55519	0.0106131	0.087438
Inf2	874.271	0.259516	0.101596	2.55439	0.0106375	0.0875897
Tarsl2	808.672	-0.246665	0.0965754	-2.55412	0.0106456	0.0876058
Cers2	1048.06	0.229563	0.0898871	2.55391	0.0106521	0.0876096
Asb8	1743.1	-0.238201	0.0933192	-2.55254	0.0106939	0.0878857
Rasgrp3	719.525	-0.286628	0.112297	-2.55242	0.0106979	0.0878857
Ikbkap	691.182	0.259035	0.101546	2.55091	0.0107442	0.0882166
Camsap2	575.011	0.324566	0.127306	2.54949	0.010788	0.0885256
Nup85	419.422	-0.295036	0.115754	-2.54883	0.0108086	0.0885911
Pfn1	4065.71	0.171878	0.067439	2.54864	0.0108144	0.0885911
Rgs7	62.034	-0.888524	0.348616	-2.54872	0.0108119	0.0885911
Rif1	380.928	-0.356409	0.139952	-2.54665	0.0108764	0.0890482
H2-M3	119.825	-0.511168	0.200742	-2.54639	0.0108843	0.0890625
Fam222a	43.4915	-0.879425	0.345401	-2.5461	0.0108935	0.0890872
Ptges3l	277.424	-0.382073	0.150116	-2.54518	0.0109222	0.0892709
2310015D24Rik	32.6355	-1.08188	0.42523	-2.54422	0.0109521	0.0894646
Dusp7	1759.56	-0.233874	0.0919658	-2.54305	0.010989	0.0897154
Mkln1	1305.6	0.228904	0.0900459	2.54208	0.0110196	0.0898899
Myl1	385.075	-0.97665	0.384209	-2.54197	0.0110228	0.0898899
Irf1	566.426	-0.290294	0.114224	-2.54144	0.0110397	0.0899768
Cul9	1072.56	-0.21991	0.0865713	-2.54022	0.0110783	0.0902402
Dnm3os	76.2043	0.638215	0.251583	2.53679	0.0111873	0.0910767
Gnao1	773.744	0.438709	0.173178	2.53329	0.0112999	0.0919413
Mcm3	160.531	-0.503471	0.198838	-2.53206	0.0113394	0.0922107
Kif26a	874.319	-0.232689	0.0919426	-2.53081	0.01138	0.0924887
Adra1d	131.398	0.602965	0.238337	2.52988	0.0114102	0.0926298
Tada3	457.64	-0.307408	0.121506	-2.52998	0.0114069	0.0926298
Mgea5	2104.17	0.200948	0.0794465	2.52935	0.0114273	0.0927164
Gatsl3	187.14	0.473725	0.187334	2.52877	0.0114463	0.0928033
Nppa	4931.07	1.75676	0.694748	2.52863	0.0114508	0.0928033
3110053B16Rik	28.0881	1.13931	0.450863	2.52696	0.0115055	0.0931941
Casc1	95.7444	-0.643576	0.254886	-2.52496	0.0115713	0.0936262
Nsmce1	567.689	-0.302465	0.119791	-2.52494	0.0115718	0.0936262
Ogfod2	307.855	-0.34891	0.138219	-2.52433	0.0115918	0.0937354
Adora1	426.796	0.419607	0.16626	2.5238	0.0116095	0.0937622
Fgf13	1329.2	0.242711	0.096181	2.52348	0.0116199	0.0937622
Mid2	540.035	0.304997	0.120865	2.52344	0.0116212	0.0937622
Plekha5	647.123	-0.258467	0.102424	-2.52351	0.011619	0.0937622
Espl1	45.1925	-0.797053	0.31591	-2.52304	0.0116346	0.0938182
Chd3	944.711	-0.298342	0.118285	-2.52223	0.0116613	0.0939286
Sptan1	5803.51	0.21053	0.0834637	2.52242	0.0116551	0.0939286
Eef1akmt1	315.925	-0.346003	0.137199	-2.52192	0.0116717	0.0939548
Thy1	242.705	-0.382963	0.151865	-2.52174	0.0116776	0.0939548
Pop7	124.917	-0.489308	0.194126	-2.52056	0.0117168	0.0941786
Vsig10	264.739	0.355251	0.140944	2.52051	0.0117185	0.0941786
Abtb2	1040.11	0.29696	0.117862	2.51956	0.0117503	0.094382
Alg12	193.943	-0.40433	0.160613	-2.51742	0.0118219	0.0948515
Vasn	406.011	-0.323336	0.128437	-2.51746	0.0118203	0.0948515
Ddx3x	4843.75	0.171176	0.0680282	2.51626	0.0118609	0.0951116
Rapsn	334.483	-0.374285	0.148861	-2.51433	0.0119259	0.0955798
Plce1	727.079	0.306527	0.12195	2.51354	0.0119525	0.0957397
Mfsd11	581.265	-0.266094	0.105896	-2.51278	0.0119783	0.095893
Ensa	2350.89	0.205539	0.0818191	2.51211	0.0120011	0.0959893
Gm6254	11.6718	1.87301	0.745697	2.51176	0.012013	0.0959893
Pigz	41.0076	-0.995846	0.396431	-2.51203	0.012004	0.0959893
Psmd3	3244.59	0.180206	0.0717482	2.51165	0.012017	0.0959893
Fbxo8	849.241	-0.260169	0.103606	-2.51114	0.0120341	0.0960473
Rgs11	31.543	1.00505	0.400253	2.51104	0.0120375	0.0960473
Fam102a	501.364	-0.301351	0.120021	-2.51083	0.0120449	0.0960525
Rps10	2810.09	0.188704	0.0751687	2.51041	0.0120593	0.0961142
Fiz1	451.981	-0.296541	0.118164	-2.50957	0.0120878	0.0962358
Osgin1	80.0183	-0.594494	0.236873	-2.50976	0.0120812	0.0962358
Gm7160	28.6466	-0.976174	0.389036	-2.50921	0.0121001	0.0962801
Cdca3	17.1295	-1.25677	0.501127	-2.50789	0.0121456	0.0965889
Arf4	1647.41	0.193421	0.0771431	2.5073	0.0121659	0.0966972
Ccdc97	1347.71	-0.200641	0.0800291	-2.5071	0.0121728	0.0966985
Aff4	1432.9	0.219144	0.0874208	2.50677	0.012184	0.096707
Tek	1426.69	-0.223103	0.0890035	-2.50668	0.0121873	0.096707
Ccdc186	754.21	0.239531	0.0956448	2.50438	0.0122666	0.0972406
Fam69a	88.1055	-0.604573	0.24141	-2.50434	0.012268	0.0972406
Psmb10	988.022	0.275762	0.110154	2.50343	0.0122995	0.0974372
Prdm1	80.9087	-0.718028	0.286844	-2.5032	0.0123077	0.0974486
Idua	697.482	-0.272379	0.108828	-2.50283	0.0123204	0.0974957
Wdr43	569.133	0.263203	0.105223	2.50138	0.0123711	0.0978426
Hk3	33.573	-1.00634	0.402368	-2.50105	0.0123827	0.0978809
Siae	371.371	-0.314491	0.125755	-2.50082	0.0123907	0.0978907
Vwa1	493.054	-0.274199	0.109661	-2.50042	0.0124045	0.0979459
Arc	39.3758	-0.870346	0.348196	-2.49959	0.0124339	0.0980706
Raph1	2081.38	0.223659	0.0894729	2.49974	0.0124285	0.0980706
Ppp1r12a	852.371	0.229256	0.0917464	2.4988	0.0124615	0.098235
Fblim1	7428.79	0.176386	0.0706029	2.49829	0.0124795	0.0982692
Ikzf1	51.01	-0.735335	0.294327	-2.49836	0.012477	0.0982692
Id1	974.994	0.315802	0.126467	2.4971	0.0125212	0.0985441
Uchl1	351.29	0.355757	0.142521	2.49616	0.0125545	0.0987519
Ppp1r15b	873.9	0.254832	0.102157	2.49451	0.0126131	0.0991586
Als2	267.285	-0.381136	0.152824	-2.49396	0.0126326	0.099258
Rnaseh2b	174.509	-0.449149	0.180148	-2.49323	0.0126588	0.0994101
Slc4a4	617.288	0.299835	0.120312	2.49214	0.0126975	0.0996594
Arrdc3	1198.95	0.296347	0.118972	2.4909	0.0127419	0.0996827
Chac2	169.823	-0.436162	0.175073	-2.49132	0.0127271	0.0996827
F3	568.065	0.333331	0.133793	2.49138	0.0127247	0.0996827
Hif1an	1439.51	0.264493	0.10617	2.49123	0.0127301	0.0996827
Ilf3	1000.91	0.229087	0.0919402	2.49169	0.0127136	0.0996827
Stx3	302.952	0.360066	0.144541	2.49109	0.0127352	0.0996827
Zfp40	80.9553	0.635506	0.255171	2.49051	0.0127561	0.0997397
Ccdc84	129.789	-0.473712	0.190255	-2.48988	0.0127787	0.0998621
Tbcb	686.892	0.261792	0.105153	2.48964	0.0127873	0.0998752
Gls	1849.84	0.20593	0.0827287	2.48923	0.0128021	0.0999371
Map2k2	2280.43	-0.19372	0.0778442	-2.48856	0.0128262	0.100071
Pcdhb20	96.3001	-0.570505	0.229289	-2.48815	0.0128411	0.100133
Sars2	284.917	-0.361572	0.145353	-2.48754	0.0128629	0.100249
Atad1	1930.03	0.234451	0.0942796	2.48676	0.0128911	0.10036
Clec3b	1154.74	-0.376733	0.151484	-2.48695	0.0128844	0.10036
Zfp141	97.9135	0.598536	0.240711	2.48653	0.0128995	0.100371
Haus2	372.093	0.327352	0.131725	2.48511	0.012951	0.100609
Rpsa	9723.4	0.178315	0.0717516	2.48518	0.0129487	0.100609
Zfp710	832.735	0.25291	0.101757	2.48542	0.0129397	0.100609
Cenpj	97.7283	-0.530168	0.213413	-2.48423	0.0129831	0.100774
Tmtc1	2523.49	0.28004	0.112731	2.48415	0.0129862	0.100774
Kars	2208.58	0.18952	0.0763693	2.48163	0.0130784	0.101435
Ino80c	465.273	0.295558	0.119269	2.47809	0.0132089	0.102392
Myo1e	371.481	-0.342439	0.138223	-2.47744	0.0132328	0.102522
Gemin6	49.8469	-0.735129	0.296896	-2.47605	0.0132844	0.102812
Gm5113	392.169	0.35627	0.143886	2.47607	0.0132839	0.102812
Kdsr	220.931	0.372043	0.150304	2.47528	0.0133133	0.102925
Rps6ka5	204.375	-0.380259	0.15362	-2.47532	0.0133116	0.102925
Gtf2f2	196.269	0.406187	0.164151	2.47447	0.0133435	0.103096
Kif16b	1036.25	-0.214737	0.0867936	-2.47411	0.0133569	0.103096
Nip7	256.325	0.359841	0.145438	2.47419	0.0133539	0.103096
Prps1	614.282	0.262617	0.106209	2.47263	0.0134122	0.103468
Gm21685	14.9277	-1.44243	0.583633	-2.47147	0.0134558	0.103728
Myh11	1441.3	-0.286445	0.115906	-2.47135	0.0134604	0.103728
Lrrc10	3585.59	0.57746	0.233715	2.47079	0.0134816	0.103836
Hmgn1	938.556	-0.232406	0.094073	-2.47049	0.0134928	0.103867
Atg2b	626.562	0.265559	0.107545	2.46929	0.0135383	0.104162
Fitm2	4956.34	-0.193528	0.0783841	-2.46897	0.0135503	0.104199
A430105I19Rik	992.709	-0.272363	0.110357	-2.46801	0.0135866	0.1042
Adh5	1412.6	0.236385	0.0957736	2.46817	0.0135807	0.1042
Lingo1	65.3804	-0.716076	0.2901	-2.46837	0.0135728	0.1042
Stk38	1027.1	0.241368	0.0977919	2.46818	0.0135801	0.1042
Tspan18	349.904	-0.356929	0.144619	-2.46807	0.0135843	0.1042
Mef2a	3884.29	-0.19112	0.07745	-2.46766	0.0136001	0.104248
Mtpn	1250.95	0.207192	0.0839873	2.46694	0.0136272	0.104397
Txn1	917.313	-0.231029	0.0936568	-2.46677	0.013634	0.104397
Cdk5rap1	227.647	0.480586	0.194882	2.46603	0.0136618	0.104442
Epn1	4604.62	-0.169997	0.0689343	-2.46607	0.0136603	0.104442
Gm6206	139.627	-0.670591	0.271951	-2.46585	0.0136688	0.104442
Pcnt	1762.3	-0.222818	0.0903457	-2.46628	0.0136525	0.104442
Tmtc4	130.01	-0.501691	0.203647	-2.46353	0.0137577	0.105065
Col8a1	993.95	0.360906	0.146581	2.46216	0.0138102	0.105354
Zkscan3	1038.35	-0.236147	0.095909	-2.46219	0.013809	0.105354
Cd164	3254.02	0.17793	0.0722802	2.46167	0.0138293	0.105444
Crlf1	49.903	0.909497	0.369633	2.46054	0.0138729	0.10562
Grb14	3050.49	-0.212633	0.0864073	-2.46083	0.0138617	0.10562
Wdr37	788.331	0.273875	0.111309	2.4605	0.0138742	0.10562
Ttll1	984.632	-0.256175	0.104136	-2.46001	0.0138934	0.10571
Acad11	2413.32	-0.172737	0.070247	-2.459	0.0139325	0.10584
Cacna2d3	19.7612	-1.15583	0.469989	-2.45927	0.013922	0.10584
Cfl1	2427.03	-0.193514	0.0786955	-2.45903	0.0139314	0.10584
Rpa3	121.414	-0.489618	0.199219	-2.45768	0.0139836	0.106173
Tmem189	535.97	0.27711	0.112789	2.4569	0.0140143	0.10635
Ado	706.203	-0.237345	0.0966241	-2.45637	0.0140349	0.10645
Usp25	1781.56	0.225071	0.0917042	2.45431	0.0141154	0.107004
6430562O15Rik	73.7385	-0.626812	0.25554	-2.4529	0.0141711	0.10737
Gsk3b	1553.25	0.239549	0.0977131	2.45155	0.0142241	0.107658
Laptm5	517.731	-0.338874	0.138226	-2.45159	0.0142227	0.107658
Sestd1	637.795	0.287312	0.117213	2.4512	0.014238	0.107707
Cyb5b	1689.61	-0.189767	0.0774363	-2.45062	0.0142611	0.107768
Slc41a1	2492.96	0.264894	0.108089	2.4507	0.0142579	0.107768
Dlc1	2835.56	0.244686	0.0998727	2.44997	0.0142866	0.107905
Ano4	115.749	0.649692	0.265341	2.44851	0.0143447	0.108238
Lyl1	147.963	-0.453728	0.18531	-2.44849	0.0143457	0.108238
Iqsec1	2266.49	-0.174513	0.0712874	-2.44802	0.0143643	0.108322
Gm6136	808.266	0.263064	0.107524	2.44656	0.0144228	0.108706
Fahd1	916.898	-0.234691	0.0959865	-2.44504	0.0144835	0.109106
Pphln1	501.318	0.280213	0.114634	2.44441	0.0145087	0.10924
Gm20544	89.5847	-0.566296	0.231748	-2.44359	0.0145421	0.109409
Spsb1	930.227	0.349849	0.143176	2.44348	0.0145464	0.109409
Grk6	669.501	-0.25407	0.104005	-2.44287	0.0145711	0.109538
Sox17	615.747	0.310194	0.127013	2.44222	0.0145973	0.109677
Fam161b	207.575	-0.393027	0.160943	-2.44202	0.0146055	0.109682
Map3k10	656.865	-0.245841	0.100705	-2.4412	0.0146386	0.109873
Mypn	3852.38	0.29414	0.120516	2.44068	0.0146596	0.109973
Nudt7	1011.82	-0.348948	0.143012	-2.44	0.0146874	0.110125
Eif2b3	233.07	0.382414	0.156829	2.43841	0.0147519	0.110437
Fam136a	593.785	0.271432	0.111305	2.43862	0.0147433	0.110437
Ube2j1	806.126	0.267927	0.109875	2.43846	0.0147499	0.110437
Eif6	717.87	0.273664	0.112258	2.43781	0.0147767	0.110545
Gm4202	47.3808	-0.85542	0.350915	-2.43768	0.0147818	0.110545
Asph	3801.92	0.191446	0.0785584	2.437	0.0148099	0.110563
Slc20a1	502.247	-0.309585	0.127042	-2.43687	0.0148148	0.110563
Slc39a8	28.2545	-0.976069	0.400483	-2.43723	0.0148004	0.110563
Tlcd2	104.487	-0.523704	0.214863	-2.43739	0.0147937	0.110563
C1qtnf4	181.492	0.429886	0.176448	2.43633	0.014837	0.110614
H2-Q5	172.114	-0.523783	0.214987	-2.43635	0.0148365	0.110614
Ube3a	1116.03	0.208965	0.0857831	2.43597	0.0148518	0.110667
Mpst	733.831	-0.26995	0.110909	-2.43399	0.0149335	0.111219
Eogt	417.189	0.309116	0.127013	2.43374	0.0149439	0.111239
Arhgap28	94.0931	-0.545323	0.224123	-2.43314	0.0149686	0.111365
Obfc1	279.045	-0.344208	0.141509	-2.4324	0.0149991	0.111535
Ncapd3	346.478	-0.338668	0.139306	-2.4311	0.0150529	0.111769
Rassf3	3726.39	-0.173851	0.0715117	-2.43108	0.0150539	0.111769
Serac1	242.465	-0.399724	0.164403	-2.43137	0.0150418	0.111769
Cd180	24.0044	-1.09594	0.450935	-2.43038	0.0150832	0.111871
Donson	99.446	-0.518066	0.21315	-2.43052	0.015077	0.111871
Hlx	254.937	-0.385647	0.15877	-2.42897	0.015142	0.112147
Myo18a	7259.34	0.204059	0.0840068	2.42908	0.0151373	0.112147
Smim8	480.967	0.26915	0.11081	2.42892	0.0151437	0.112147
Rps17	3938.66	0.18712	0.0770492	2.42858	0.0151582	0.112197
Gm20712	66.7845	-0.641123	0.264172	-2.42692	0.0152277	0.112654
Rab11a	1379.27	0.199028	0.0821723	2.42208	0.015432	0.114107
Dgke	561.064	0.334116	0.138001	2.4211	0.0154734	0.114354
Fkbp2	240.615	-0.420569	0.173742	-2.42065	0.015493	0.114409
Lias	817.206	0.229295	0.0947338	2.42041	0.015503	0.114409
Tinagl1	1517.12	0.296111	0.122341	2.42037	0.0155047	0.114409
Chrd	108.29	0.549616	0.227194	2.41915	0.0155569	0.114736
Acsf3	563.386	-0.276831	0.114472	-2.41833	0.015592	0.114861
Gp1bb	12.1414	1.63333	0.675432	2.4182	0.0155977	0.114861
Hnrnpk	5054.32	0.159613	0.0660039	2.41824	0.0155958	0.114861
Atr	233.297	0.382898	0.158381	2.41757	0.0156244	0.114999
Tubg1	482.455	-0.28552	0.118127	-2.41706	0.0156464	0.115102
Gli2	124.184	0.515284	0.213222	2.41666	0.0156637	0.115112
Kbtbd11	116.594	0.538141	0.222669	2.41678	0.0156584	0.115112
Bambi-ps1	35.6128	-0.846859	0.350566	-2.41569	0.0157055	0.11536
Ttc12	668.927	-0.320247	0.132734	-2.41269	0.0158352	0.116253
Amigo3	118.734	-0.543882	0.225516	-2.41172	0.0158775	0.116413
Exoc3l4	52.2936	-0.719879	0.298502	-2.41164	0.0158812	0.116413
Psma6	1692.89	0.188571	0.0781815	2.41197	0.0158668	0.116413
Dusp6	586.405	0.334809	0.138851	2.41129	0.0158963	0.116465
Ptpn14	1069.54	0.272399	0.112993	2.41076	0.0159195	0.116576
Urb2	208.887	0.451807	0.187456	2.4102	0.0159438	0.116695
Acot6	124.198	0.521287	0.216304	2.40997	0.0159537	0.116708
Slc39a6	175.602	0.417963	0.173476	2.40935	0.015981	0.116848
Mina	285.871	0.394336	0.16381	2.40728	0.0160717	0.117452
Pdlim7	895.615	-0.255903	0.10633	-2.40668	0.0160984	0.117587
Dusp16	554.887	-0.261954	0.108861	-2.40632	0.016114	0.117642
Usp39	431.671	0.320178	0.133078	2.40594	0.0161311	0.117707
Mamld1	302.497	0.404852	0.168305	2.40546	0.0161521	0.117801
Dlgap1	18.5425	-1.23906	0.515195	-2.40502	0.0161715	0.117873
Rnf2	354.729	0.344626	0.143304	2.40487	0.0161784	0.117873
Adra1a	182.075	-0.509219	0.211882	-2.40332	0.0162472	0.118263
Bcl2l13	1879.25	0.193326	0.0804467	2.40316	0.0162542	0.118263
Fam124a	195.572	0.429604	0.17877	2.40311	0.0162564	0.118263
1110065P20Rik	196.704	-0.387319	0.161228	-2.4023	0.0162921	0.118403
Perm1	7546.91	-0.210736	0.0877173	-2.40244	0.0162859	0.118403
Hsph1	1054.68	-0.320096	0.133278	-2.40171	0.0163187	0.118536
Trmt13	139.642	-0.456663	0.190155	-2.40153	0.0163269	0.118536
Fndc5	7026.19	-0.199116	0.0829459	-2.40056	0.01637	0.11879
AI607873	232.232	0.55449	0.231142	2.39891	0.0164439	0.119259
Arhgap32	319.489	-0.376538	0.156973	-2.39875	0.0164513	0.119259
Rps4x	6092.73	0.181419	0.07565	2.39814	0.0164788	0.119399
Col27a1	274.642	0.384904	0.160528	2.39774	0.0164967	0.119432
Rps24	4996.95	0.169616	0.070742	2.39767	0.0164999	0.119432
Psmd11	1680.01	0.192672	0.0804272	2.39561	0.0165926	0.120042
Arxes2	18.9319	1.38517	0.578357	2.39501	0.0166201	0.120181
Hip1r	789.499	0.270093	0.11282	2.39401	0.0166653	0.120447
Gtf2b	285.741	0.431286	0.180281	2.3923	0.0167431	0.120913
Sipa1	1195.85	-0.201096	0.0840622	-2.39223	0.0167464	0.120913
Ccdc136	70.2445	0.644506	0.269629	2.39034	0.0168326	0.121474
[truncated: 23,118 more rows]

## Sheet: cKO vs Ctrl_ribosome proteins
	baseMean	log2FoldChange	lfcSE	stat	pvalue	padj
Rpl3	4665.55	0.754584	0.0785315	9.60868	7.35e-22	3.93e-19
Rpl3l	4160.19	-0.656904	0.132561	-4.95547	7.22e-07	3.83e-05
Rpl19	4284.27	0.297908	0.0662472	4.49691	6.89e-06	0.000269547
Rpl4	9778.55	0.280346	0.0627318	4.46896	7.86e-06	0.000301562
Rpl12	3116.59	0.301016	0.0702213	4.28667	1.81e-05	0.000614199
Rpl18	4002.94	0.292113	0.0716382	4.07761	4.55e-05	0.00131281
Rpl10a	3467.82	0.256765	0.0672003	3.82089	0.000132973	0.00312421
Rpl8	7462.02	0.254437	0.0670928	3.79231	0.000149251	0.00343945
Rpl28	3674.59	0.247505	0.0661495	3.74161	0.000182848	0.00404966
Rpl27a	4036.83	0.282551	0.0762368	3.70623	0.000210366	0.00450927
Rpl6	5920.45	0.286211	0.0776336	3.68669	0.000227191	0.00475684
Rpl9	3920.5	0.264176	0.0717786	3.68042	0.000232846	0.0048262
Rpl30	2397.32	0.277643	0.0766543	3.62202	0.00029231	0.00579558
Rpl31	2767.64	0.254899	0.0753122	3.38457	0.000712907	0.011917
Rpl35	1804.59	0.268667	0.0796387	3.37357	0.000741996	0.012322
Rplp0	13128.8	0.194863	0.0616687	3.15984	0.00157858	0.02196
Rpl23	2466.65	0.230153	0.076594	3.00484	0.00265716	0.0323206
Rpl36a	950.627	0.272968	0.0925261	2.95017	0.00317602	0.0370431
Rpl22	2451.2	0.218947	0.0764115	2.86537	0.00416518	0.0448557
Rplp1	7471.71	0.174208	0.0614132	2.83666	0.00455883	0.0478296
Rpl15	3793.72	0.244313	0.0870521	2.80651	0.00500806	0.0510936
Rpl39	1189.77	0.242613	0.0874359	2.77475	0.00552436	0.0546976
Rpl29	2953.32	0.198151	0.0722737	2.74167	0.00611274	0.0587491
Rpl6l	355.356	0.334076	0.12382	2.69807	0.00697421	0.0642875
Rpl17	3060.18	0.18912	0.0705379	2.68111	0.00733789	0.0668286
Rpl36al	1018.36	0.286487	0.107071	2.67568	0.00745784	0.0675373
Rpl13	8200.9	0.165396	0.0627631	2.63524	0.00840787	0.0733325
Rpl37	1521.09	0.210838	0.0807121	2.61222	0.00899554	0.0773359
Rpl5	5517.04	0.163752	0.0685931	2.38729	0.016973	0.122182
Rpl23a	2801.58	0.193219	0.0822151	2.35017	0.018765	0.130775
Rpl14	3527.87	0.169191	0.0739922	2.28661	0.0222186	0.145959
Rpl11	3524.4	0.182353	0.0803779	2.2687	0.0232865	0.150104
Rpl38	762.238	0.215843	0.0984593	2.19221	0.0283646	0.170566
Rpl32	2719.84	0.170519	0.0779231	2.1883	0.028648	0.171984
Rpl21	1281.49	0.182175	0.0867588	2.09979	0.0357471	0.19903
Rpl35a	1022.68	0.174345	0.0871021	2.00162	0.0453257	0.230873
Rpl37a	2096.49	0.141673	0.0742783	1.90733	0.0564778	0.266432
Rpl36	3244.17	0.139856	0.0758666	1.84345	0.0652633	0.290316
Rpl37rt	142.717	0.340409	0.187801	1.8126	0.0698933	0.30161
Rpl41	4217.79	0.127291	0.0732761	1.73714	0.0823621	0.330227
Rplp2	3983.28	0.103607	0.0692948	1.49516	0.134872	0.437424
Rpl7	6129.45	0.102722	0.0694006	1.48013	0.138839	0.444041
Rpl18a	4809.91	0.09811	0.0683447	1.43552	0.15114	0.464892
Rpl34	2047.2	0.115264	0.080954	1.42383	0.154497	0.470999
Rpl24	18.6454	0.688138	0.507431	1.35612	0.175061	0.502573
Rpl26	3163.5	0.0677563	0.0796089	0.851114	0.394706	0.734239
Rpl10	5448.9	0.0601306	0.0707436	0.84998	0.395336	0.734426
Rpl27	2795.87	0.0531052	0.0710551	0.747381	0.454834	0.774119
Rpl22l1	236.932	-0.0946526	0.156937	-0.603124	0.546426	0.829065
Rpl13a	141.415	-0.0967114	0.179923	-0.537515	0.590912	0.851245
Rpl7a	3928.5	-0.00353036	0.0675856	-0.0522354	0.958341	0.989127
Rpl7l1	975.993	0.0047162	0.100373	0.0469865	0.962524	0.990189
Rpl39l	2.33296	0.236571	1.65501	0.142942	0.886336	1

## Sheet: GO_BP_upregulated genes
Category	Term	Count	%	PValue	Genes	List Total	Pop Hits	Pop Total	Fold Enrichment	Bonferroni	Benjamini	FDR
GOTERM_BP_DIRECT	GO:0043065~positive regulation of apoptotic process	23	7.1875	5.93725e-08	ZFP622, TGFB2, TNFRSF12A, IGFBP3, ZBTB16, BMP7, PTPRF, GADD45G, NR4A1, SFRP2, ZMAT3, DDIT3, ANKRD1, FAS, CYP1B1, SPRY1, EEF1E1, PHLDA1, TLR4, RNF122, PHLDA3, BCL2L1, TRP53INP1	284	402	20240	4.0775	0.000134589	0.000134598	0.000133232
GOTERM_BP_DIRECT	GO:0045214~sarcomere organization	9	2.8125	1.25555e-07	CSRP3, SYNPO2L, PRKAR1A, LDB3, FLNC, MYOZ2, MYOM2, LMOD2, MYH7	284	43	20240	14.9165	0.000284592	0.000142316	0.000140872
GOTERM_BP_DIRECT	GO:0006915~apoptotic process	28	8.75	8.08217e-07	CSRNP1, AGAP2, HIF3A, ZMAT3, PERP, THEM4, CHAC1, PHLDA1, PHLDA3, TRP53INP1, TNFRSF12A, RHBDD1, IGFBP3, AEN, PRKCA, TICAM1, GADD45G, NR4A1, RNF144B, SFRP2, DDIT3, DDIT4, BCL2, FAS, TRIB3, SGK1, FGFR3, BCL2L1	284	666	20240	2.99624	0.00183055	0.000610743	0.000604547
GOTERM_BP_DIRECT	GO:0008285~negative regulation of cell proliferation	21	6.5625	3.35516e-06	TGFB2, CDKN1A, IGFBP3, ZBTB16, PRKCA, TOB2, KLF4, BMP7, TOB1, PTPRF, ADGRG1, RGCC, SFRP2, CLMN, BCL2, CYP1B1, SPRY1, ATF5, EEF1E1, FGFR3, TRP53INP1	284	433	20240	3.4564	0.0075773	0.00190154	0.00188224
GOTERM_BP_DIRECT	GO:0015804~neutral amino acid transport	6	1.875	5.1085e-06	SLC7A5, SLC38A1, SLC7A8, SLC43A2, SLC3A2, SLC38A2	284	19	20240	22.5056	0.0115142	0.00231619	0.00229269
GOTERM_BP_DIRECT	GO:0034198~cellular response to amino acid starvation	7	2.1875	5.31065e-05	CDKN1A, LARS, SESN2, FAS, SLC38A2, ATF3, ATF4	284	48	20240	10.3932	0.11343	0.0200654	0.0198618
GOTERM_BP_DIRECT	GO:0045944~positive regulation of transcription from RNA polymerase II promoter	36	11.25	7.98365e-05	CSRNP1, CEBPB, CEBPD, CEBPG, AGAP2, HIF3A, ABRA, NPAS2, CSRP3, MYC, MCF2L, S1PR1, TBL1X, IRX3, NOG, IFRD1, KLF4, POU3F1, BMP7, KLF15, KLF2, ETV5, NFKBIA, PER1, NR4A1, KLF6, NR4A3, SFRP2, RGCC, DDIT3, MAFF, MAML3, ATF5, TLR4, ATF3, ATF4	284	1257	20240	2.04108	0.165562	0.0258556	0.0255933
GOTERM_BP_DIRECT	GO:0006418~tRNA aminoacylation for protein translation	6	1.875	0.000118763	CARS, YARS, LARS, SARS, GARS, IARS	284	35	20240	12.2173	0.236049	0.0336545	0.033313
GOTERM_BP_DIRECT	GO:0008283~cell proliferation	16	5	0.000147972	ZBTB16, NOG, ODC1, IRS2, NRG1, PRKCA, BMP7, SORL1, PRKAR1A, MYC, FGF18, S1PR1, BCL2, FGFR3, GLUL, BCL2L1	284	354	20240	3.22113	0.285004	0.0372726	0.0368944
GOTERM_BP_DIRECT	GO:0006865~amino acid transport	7	2.1875	0.000188322	SLC7A5, SLC38A1, SLC7A8, SLC6A9, MYC, SLC3A2, SLC38A2	284	60	20240	8.31455	0.347515	0.0426927	0.0422596
GOTERM_BP_DIRECT	GO:0015820~leucine transport	4	1.25	0.000301792	SLC7A5, SLC7A8, SLC43A2, SLC3A2	284	10	20240	28.507	0.495539	0.0536853	0.0531407
GOTERM_BP_DIRECT	GO:0070059~intrinsic apoptotic signaling pathway in response to endoplasmic reticulum stress	6	1.875	0.000321467	CEBPB, DDIT3, BCL2, TRIB3, CHAC1, ATF4	284	43	20240	9.94432	0.517552	0.0536853	0.0531407
GOTERM_BP_DIRECT	GO:0007275~multicellular organism development	31	9.6875	0.000370603	HACD1, TENM4, TCF23, TMEM53, HIF3A, CELSR1, EDA2R, TMEM100, CSRP3, ZFP36, ADGRG1, CDH20, PDGFC, ENC1, SEMA6B, TNFRSF12A, IRX3, SPRY4, NOG, IFRD1, BMP7, SORL1, GADD45G, PTP4A1, SFRP2, ROR1, SPRY1, FGFR3, FREM2, LGR4, PICALM	284	1098	20240	2.01211	0.568424	0.0536853	0.0531407
GOTERM_BP_DIRECT	GO:0008652~cellular amino acid biosynthetic process	5	1.5625	0.000375459	PSAT1, PYCR1, ASNS, PHGDH, ALDH18A1	284	25	20240	14.2535	0.573151	0.0536853	0.0531407
GOTERM_BP_DIRECT	GO:1990440~positive regulation of transcription from RNA polymerase II promoter in response to endoplasmic reticulum stress	4	1.25	0.000410678	CEBPB, DDIT3, ATF3, ATF4	284	11	20240	25.9155	0.605919	0.0536853	0.0531407
GOTERM_BP_DIRECT	GO:0010628~positive regulation of gene expression	21	6.5625	0.000412744	CEBPB, TGFB2, NOG, TCF23, NRG1, TICAM1, POU3F1, KLF4, BMP7, NR0B2, ACTA1, RGCC, CRNDE, MYC, FGF18, TLR4, SLC38A2, ATF3, CD44, ATF4, TRP53INP1	284	612	20240	2.44546	0.607761	0.0536853	0.0531407
GOTERM_BP_DIRECT	GO:0045444~fat cell differentiation	8	2.5	0.000512837	NR4A1, CEBPB, NR4A3, CEBPD, ARID5B, TBL1X, KLF4, ATF5	284	100	20240	5.70141	0.687421	0.0536853	0.0531407
GOTERM_BP_DIRECT	GO:0015824~proline transport	4	1.25	0.000541919	SLC7A5, SLC3A2, SLC1A4, SLC38A2	284	12	20240	23.7559	0.707375	0.0536853	0.0531407
GOTERM_BP_DIRECT	GO:0097048~dendritic cell apoptotic process	3	0.9375	0.000579053	NR4A3, BCL2, BCL2L1	284	3	20240	71.2676	0.731013	0.0536853	0.0531407
GOTERM_BP_DIRECT	GO:0098713~leucine import across plasma membrane	3	0.9375	0.000579053	SLC7A5, SLC7A8, SLC3A2	284	3	20240	71.2676	0.731013	0.0536853	0.0531407
GOTERM_BP_DIRECT	GO:0015829~valine transport	3	0.9375	0.000579053	SLC7A5, SLC7A8, SLC3A2	284	3	20240	71.2676	0.731013	0.0536853	0.0531407
GOTERM_BP_DIRECT	GO:0015821~methionine transport	3	0.9375	0.000579053	SLC7A5, SLC43A2, SLC3A2	284	3	20240	71.2676	0.731013	0.0536853	0.0531407
GOTERM_BP_DIRECT	GO:0015823~phenylalanine transport	3	0.9375	0.000579053	SLC7A5, SLC43A2, SLC3A2	284	3	20240	71.2676	0.731013	0.0536853	0.0531407
GOTERM_BP_DIRECT	GO:1903801~L-leucine import into cell	3	0.9375	0.000579053	SLC7A5, SLC7A8, SLC3A2	284	3	20240	71.2676	0.731013	0.0536853	0.0531407
GOTERM_BP_DIRECT	GO:0032024~positive regulation of insulin secretion	7	2.1875	0.000592031	GPR68, PRKAR1A, ABAT, IRS2, MYRIP, GLUL, NR0B2	284	74	20240	6.74153	0.738816	0.0536853	0.0531407
GOTERM_BP_DIRECT	GO:1990253~cellular response to leucine starvation	4	1.25	0.000697228	LARS, SESN2, RRAGD, ATF4	284	13	20240	21.9285	0.794265	0.0607929	0.0601761
GOTERM_BP_DIRECT	GO:1904273~L-alanine import across plasma membrane	3	0.9375	0.0011474	SLC7A8, SLC3A2, SLC1A4	284	4	20240	53.4507	0.925923	0.0914632	0.0905353
GOTERM_BP_DIRECT	GO:0015818~isoleucine transport	3	0.9375	0.0011474	SLC7A5, SLC43A2, SLC3A2	284	4	20240	53.4507	0.925923	0.0914632	0.0905353
GOTERM_BP_DIRECT	GO:0006412~translation	13	4.0625	0.0011803	CARS, YARS, RPL3, SARS, EIF2S2, RBM3, LARS, GARS, IARS, RPS27A, EIF3C, EEF1E1, AARS	284	302	20240	3.06781	0.931253	0.0914632	0.0905353
GOTERM_BP_DIRECT	GO:0010976~positive regulation of neuron projection development	10	3.125	0.00121036	NDRG4, RGS2, ATP8A2, DPYSL3, ENC1, ANKRD1, ROR1, NRG1, BAIAP2, NME1	284	185	20240	3.8523	0.935788	0.0914632	0.0905353
GOTERM_BP_DIRECT	GO:0030336~negative regulation of cell migration	9	2.8125	0.00161461	SFRP2, DPYSL3, NOG, BCL2, CYP1B1, DPEP1, STC1, KLF4, TRP53INP1	284	156	20240	4.11159	0.974352	0.114744	0.11358
GOTERM_BP_DIRECT	GO:0007266~Rho protein signal transduction	6	1.875	0.00161968	CNKSR1, ADGRG1, MCF2L, CDC42EP4, BAIAP2, CELSR1	284	61	20240	7.00993	0.974645	0.114744	0.11358
GOTERM_BP_DIRECT	GO:0015827~tryptophan transport	3	0.9375	0.00189467	SLC7A5, SLC7A8, SLC3A2	284	5	20240	42.7606	0.986422	0.130158	0.128838
GOTERM_BP_DIRECT	GO:0050679~positive regulation of epithelial cell proliferation	7	2.1875	0.00195436	CCND2, NR4A3, MYC, NOG, GLUL, AZIN1, NME1	284	93	20240	5.36423	0.988143	0.13031	0.128987
GOTERM_BP_DIRECT	GO:0007219~Notch signaling pathway	8	2.5	0.00217719	TMEM100, NFKBIA, PERP, KCNA5, MAML3, CHAC1, NR0B2, TIMP4	284	128	20240	4.45423	0.992853	0.139807	0.138389
GOTERM_BP_DIRECT	GO:0008406~gonad development	4	1.25	0.00222014	IRX5, SERPINB6B, BCL2, BCL2L1	284	19	20240	15.0037	0.993517	0.139807	0.138389
GOTERM_BP_DIRECT	GO:0043491~protein kinase B signaling	6	1.875	0.00262217	TMEM100, LOX, IRS1, SESN2, THEM4, NRG1	284	68	20240	6.28832	0.9974	0.160661	0.159031
GOTERM_BP_DIRECT	GO:0000122~negative regulation of transcription from RNA polymerase II promoter	27	8.4375	0.00275207	CEBPB, ZFP422, TCF23, TFCP2L1, BACH2, ZFP36, MYC, ANKRD1, MYOZ2, IRX3, ZBTB16, NOG, SARS, ARID5B, IRF2BP2, KLF4, POU3F1, NR0B2, KLF2, ETV5, PER1, NR4A3, DDIT3, TRIB3, FGFR3, ATF3, ATF4	284	1031	20240	1.86637	0.998065	0.164183	0.162517
GOTERM_BP_DIRECT	GO:0001525~angiogenesis	12	3.75	0.00298459	TMEM100, ADGRG1, TNFRSF12A, FGF18, S1PR1, CYP1B1, AMOTL2, PRKCA, HIF3A, PLCD3, GLUL, RAMP1	284	294	20240	2.90888	0.998859	0.173489	0.171729
GOTERM_BP_DIRECT	GO:0000082~G1/S transition of mitotic cell cycle	6	1.875	0.00336429	CDKN1A, RGCC, CCND2, MYC, BCL2, MNAT1	284	72	20240	5.93897	0.999519	0.189152	0.187233
GOTERM_BP_DIRECT	GO:0048545~response to steroid hormone	4	1.25	0.00342092	ACTA1, LOX, BCL2, TBL1X	284	22	20240	12.9577	0.999577	0.189152	0.187233
GOTERM_BP_DIRECT	GO:0007623~circadian rhythm	7	2.1875	0.00359236	PER1, FAS, ATF5, NR0B2, LGR4, NPAS2, ATF4	284	105	20240	4.75117	0.999714	0.192487	0.190534
GOTERM_BP_DIRECT	GO:0045893~positive regulation of transcription, DNA-templated	21	6.5625	0.00370258	CEBPB, ZBTB16, POU3F1, KLF4, BMP7, KLF15, NR0B2, KLF2, ABRA, ETV5, NPAS2, NFKBIA, NR4A1, NR4A3, MYC, DDIT3, ATF5, LGR4, ATF4, PICALM, TRP53INP1	284	736	20240	2.03345	0.999777	0.192487	0.190534
GOTERM_BP_DIRECT	GO:0008584~male gonad development	8	2.5	0.00388479	TGFB2, KCNE1, SFRP2, BCL2, CYP1B1, ARID5B, EIF2S2, BCL2L1	284	142	20240	4.01508	0.999853	0.192487	0.190534
GOTERM_BP_DIRECT	GO:0002026~regulation of the force of heart contraction	4	1.25	0.00389375	CSRP3, PRKCA, SLC8A1, MYH7	284	23	20240	12.3944	0.999856	0.192487	0.190534
GOTERM_BP_DIRECT	GO:0015807~L-amino acid transport	3	0.9375	0.00390578	SLC7A5, SLC7A8, SLC43A2	284	7	20240	30.5433	0.99986	0.192487	0.190534
GOTERM_BP_DIRECT	GO:0010629~negative regulation of gene expression	14	4.375	0.00400167	TGFB2, CDKN1A, NOG, KLF4, NR0B2, NME1, SLC7A5, SFRP2, PRKAR1A, MYC, XDH, FGFR3, PICALM, TRP53INP1	284	396	20240	2.51956	0.999887	0.193017	0.191058
GOTERM_BP_DIRECT	GO:0030335~positive regulation of cell migration	11	3.4375	0.00462465	SEMA6B, PTP4A1, TGFB2, IRS1, PDGFC, FAM107A, S1PR1, IRS2, PRKCA, LAMC2, PLD1	284	268	20240	2.92516	0.999973	0.218418	0.216202
GOTERM_BP_DIRECT	GO:0001657~ureteric bud development	5	1.5625	0.00483757	GSTA3, NOG, BCL2, SPRY1, BMP7	284	49	20240	7.2722	0.999983	0.219335	0.21711
GOTERM_BP_DIRECT	GO:0030890~positive regulation of B cell proliferation	5	1.5625	0.00483757	CDKN1A, BCL2, IRS2, TICAM1, TLR4	284	49	20240	7.2722	0.999983	0.219335	0.21711
GOTERM_BP_DIRECT	GO:0043407~negative regulation of MAP kinase activity	5	1.5625	0.00598308	RGS2, SPRY4, SPRY1, BMP7, SORL1	284	52	20240	6.85265	0.999999	0.265954	0.263255
GOTERM_BP_DIRECT	GO:0003333~amino acid transmembrane transport	4	1.25	0.00617192	SLC7A5, SLC38A1, SLC7A8, SLC38A2	284	27	20240	10.5582	0.999999	0.269072	0.266342
GOTERM_BP_DIRECT	GO:0043066~negative regulation of apoptotic process	19	5.9375	0.00655653	TGFB2, CDKN1A, RHBDD1, AGAP2, ASNS, RNF157, RNF144B, NR4A3, CCND2, NNT, BCL2, PDE3A, DPEP1, FAS, SGK1, MNAT1, ATF5, CD44, BCL2L1	284	671	20240	2.01801	1	0.271774	0.269017
GOTERM_BP_DIRECT	GO:0061384~heart trabecula morphogenesis	3	0.9375	0.006573	NOG, S1PR1, BMP7	284	9	20240	23.7559	1	0.271774	0.269017
GOTERM_BP_DIRECT	GO:0006874~cellular calcium ion homeostasis	7	2.1875	0.00659354	CSRP3, BCL2, STC1, PRKCA, ATP13A3, SLC8A1, ATF4	284	119	20240	4.19221	1	0.271774	0.269017
GOTERM_BP_DIRECT	GO:0048661~positive regulation of smooth muscle cell proliferation	6	1.875	0.00715454	NR4A3, MYC, S1PR1, PRKCA, MNAT1, TLR4	284	86	20240	4.97216	1	0.284756	0.281867
GOTERM_BP_DIRECT	GO:0006357~regulation of transcription from RNA polymerase II promoter	36	11.25	0.00715971	CSRNP1, CEBPB, ZFP422, CEBPD, CEBPG, TCF23, TFCP2L1, JADE2, HIF3A, NPAS2, BACH2, ZFP36, MYC, ANKRD1, TBL1X, ZFP697, IRX5, TSC22D3, IRX3, ZBTB16, ARID5B, IRF2BP2, KLF4, POU3F1, KLF15, KLF2, ETV5, NR4A1, KLF6, NR4A3, DDIT3, MAFF, MNAT1, ATF5, ATF3, ATF4	284	1627	20240	1.57691	1	0.284756	0.281867
GOTERM_BP_DIRECT	GO:0070373~negative regulation of ERK1 and ERK2 cascade	6	1.875	0.00750617	DUSP4, SPRY4, SPRY1, KLF4, TLR4, ATF3	284	87	20240	4.91501	1	0.288415	0.285489
GOTERM_BP_DIRECT	GO:0043525~positive regulation of neuron apoptotic process	6	1.875	0.00750617	TGFB2, DDIT3, FAS, FGFR3, PTPRF, ATF4	284	87	20240	4.91501	1	0.288415	0.285489
GOTERM_BP_DIRECT	GO:0035914~skeletal muscle cell differentiation	5	1.5625	0.00826932	NR4A1, MYC, MAFF, ANKRD1, ATF3	284	57	20240	6.25154	1	0.312442	0.309273
GOTERM_BP_DIRECT	GO:0030199~collagen fibril organization	5	1.5625	0.00878626	COL28A1, TGFB2, SFRP2, LOX, CYP1B1	284	58	20240	6.14376	1	0.321265	0.318006
GOTERM_BP_DIRECT	GO:0070371~ERK1 and ERK2 cascade	5	1.5625	0.00878626	MYC, FGF18, SPRY1, FGFR3, TLR4	284	58	20240	6.14376	1	0.321265	0.318006
GOTERM_BP_DIRECT	GO:0030514~negative regulation of BMP signaling pathway	5	1.5625	0.00932387	SFRP2, NOG, TMEM53, SORL1, TOB1	284	59	20240	6.03963	1	0.326998	0.323681
GOTERM_BP_DIRECT	GO:0008284~positive regulation of cell proliferation	18	5.625	0.00933847	NMB, TGFB2, NOG, ODC1, IRS2, LAMC2, NRG1, CCND2, SFRP2, MYC, PDGFC, FGF18, S1PR1, BCL2, SLC25A5, FGFR3, ATF3, BCL2L1	284	643	20240	1.99505	1	0.326998	0.323681
GOTERM_BP_DIRECT	GO:0006897~endocytosis	9	2.8125	0.00937578	EHD4, STBD1, PACSIN2, ARHGAP27, SORL1, LRP8, PICALM, NME1, LRP11	284	209	20240	3.06894	1	0.326998	0.323681
GOTERM_BP_DIRECT	GO:0051091~positive regulation of sequence-specific DNA binding transcription factor activity	7	2.1875	0.00963726	CSRP3, RGCC, DDIT3, IFRD1, ARID5B, TLR4, ABRA	284	129	20240	3.86723	1	0.331025	0.327667
GOTERM_BP_DIRECT	GO:0070327~thyroid hormone transport	3	0.9375	0.00985861	SLC7A5, SLC7A8, SLC3A2	284	11	20240	19.4366	1	0.33149	0.328127
GOTERM_BP_DIRECT	GO:0060038~cardiac muscle cell proliferation	4	1.25	0.00994325	TGFB2, CXADR, TENM4, PRKAR1A	284	32	20240	8.90845	1	0.33149	0.328127
GOTERM_BP_DIRECT	GO:0051216~cartilage development	6	1.875	0.0103104	SFRP2, ZBTB16, NOG, BMP7, FGFR3, CD44	284	94	20240	4.549	1	0.338749	0.335312
GOTERM_BP_DIRECT	GO:0042771~intrinsic apoptotic signaling pathway in response to DNA damage by p53 class mediator	4	1.25	0.0108263	CDKN1A, DDIT4, AEN, PHLDA3	284	33	20240	8.6385	1	0.350618	0.347061
GOTERM_BP_DIRECT	GO:0030308~negative regulation of cell growth	7	2.1875	0.0114853	NPPB, TGFB2, CDKN1A, SFRP2, ZMAT3, SESN2, BCL2	284	134	20240	3.72293	1	0.366719	0.362999
GOTERM_BP_DIRECT	GO:0071233~cellular response to leucine	3	0.9375	0.0117219	LARS, SESN2, RRAGD	284	12	20240	17.8169	1	0.366849	0.363127
GOTERM_BP_DIRECT	GO:0055085~transmembrane transport	14	4.375	0.011813	SLC37A1, SLC45A3, SLC43A2, ABCA5, SLC43A3, KCNA5, SLC8A1, SLC4A8, SLC7A5, SLC7A8, SLC16A6, SLC25A5, MFSD4B1, SLC19A2	284	454	20240	2.19768	1	0.366849	0.363127
GOTERM_BP_DIRECT	GO:0035025~positive regulation of Rho protein signal transduction	4	1.25	0.0127247	ADGRG1, SYNPO2L, MCF2L, ABRA	284	35	20240	8.14487	1	0.389822	0.385867
GOTERM_BP_DIRECT	GO:0051764~actin crosslink formation	3	0.9375	0.0158678	BAIAP2L1, DPYSL3, BAIAP2	284	14	20240	15.2716	1	0.479631	0.474765
GOTERM_BP_DIRECT	GO:0048839~inner ear development	5	1.5625	0.0166828	TGFB2, CEBPD, ROR1, FGFR3, FREM2	284	70	20240	5.09054	1	0.497632	0.492583
GOTERM_BP_DIRECT	GO:0051017~actin filament bundle assembly	4	1.25	0.0170583	BAIAP2L1, DPYSL3, FAM107A, BAIAP2	284	39	20240	7.3095	1	0.502222	0.497126
GOTERM_BP_DIRECT	GO:0042060~wound healing	6	1.875	0.0179119	TGFB2, CDKN1A, LOX, NOG, NRG1, CELSR1	284	108	20240	3.95931	1	0.517294	0.512046
GOTERM_BP_DIRECT	GO:0042594~response to starvation	4	1.25	0.0182547	YARS, ZFP36, DDIT3, LRP11	284	40	20240	7.12676	1	0.517294	0.512046
GOTERM_BP_DIRECT	GO:0048008~platelet-derived growth factor receptor signaling pathway	4	1.25	0.0182547	CSRNP1, NR4A3, PDGFC, ARID5B	284	40	20240	7.12676	1	0.517294	0.512046
GOTERM_BP_DIRECT	GO:0042149~cellular response to glucose starvation	5	1.5625	0.0191758	SESN2, BCL2, ASNS, UPP1, ATF4	284	73	20240	4.88134	1	0.51999	0.514714
GOTERM_BP_DIRECT	GO:0043154~negative regulation of cysteine-type endopeptidase activity involved in apoptotic process	5	1.5625	0.0191758	NR4A1, SFRP2, DPEP1, KLF4, CD44	284	73	20240	4.88134	1	0.51999	0.514714
GOTERM_BP_DIRECT	GO:0010468~regulation of gene expression	14	4.375	0.0192337	IRX5, IRS1, TOB2, KLF15, TOB1, SLC8A1, NFKBIA, LOX, MYC, BCL2, GNB3, FAS, PHGDH, ATF5	284	484	20240	2.06146	1	0.51999	0.514714
GOTERM_BP_DIRECT	GO:0001707~mesoderm formation	4	1.25	0.0194968	NR4A3, PRKAR1A, NOG, BMP7	284	41	20240	6.95294	1	0.51999	0.514714
GOTERM_BP_DIRECT	GO:0045595~regulation of cell differentiation	4	1.25	0.0194968	CEBPB, CEBPD, NRG1, KLF4	284	41	20240	6.95294	1	0.51999	0.514714
GOTERM_BP_DIRECT	GO:0032922~circadian regulation of gene expression	5	1.5625	0.0200551	PER1, NR0B2, LGR4, NPAS2, ATF4	284	74	20240	4.81538	1	0.520436	0.515156
GOTERM_BP_DIRECT	GO:0046902~regulation of mitochondrial membrane permeability	3	0.9375	0.0205445	BCL2, SLC25A5, BCL2L1	284	16	20240	13.3627	1	0.520436	0.515156
GOTERM_BP_DIRECT	GO:0002027~regulation of heart rate	4	1.25	0.0207844	IRX5, SLC8A1, SNTA1, MYH7	284	42	20240	6.78739	1	0.520436	0.515156
GOTERM_BP_DIRECT	GO:0048468~cell development	4	1.25	0.0207844	IRX5, IRX3, ARID5B, BMP7	284	42	20240	6.78739	1	0.520436	0.515156
GOTERM_BP_DIRECT	GO:0060325~face morphogenesis	4	1.25	0.0207844	CSRNP1, TGFB2, NOG, ARID5B	284	42	20240	6.78739	1	0.520436	0.515156
GOTERM_BP_DIRECT	GO:0070374~positive regulation of ERK1 and ERK2 cascade	9	2.8125	0.0208909	NDRG4, PDGFC, FGF18, NRG1, PRKCA, FGFR3, TLR4, CD44, NTSR2	284	242	20240	2.65045	1	0.520436	0.515156
GOTERM_BP_DIRECT	GO:0000165~MAPK cascade	6	1.875	0.0213366	NPPB, ZFP36, IGFBP3, MYC, NRG1, FGFR3	284	113	20240	3.78412	1	0.525761	0.520427
GOTERM_BP_DIRECT	GO:0000902~cell morphogenesis	6	1.875	0.0228178	TGFB2, CDH20, BCL2, NRG1, TFCP2L1, KLF2	284	115	20240	3.71831	1	0.542635	0.53713
GOTERM_BP_DIRECT	GO:0009749~response to glucose	5	1.5625	0.0228407	SESN2, IRS2, GLUL, NR0B2, SLC8A1	284	77	20240	4.62777	1	0.542635	0.53713
GOTERM_BP_DIRECT	GO:0048712~negative regulation of astrocyte differentiation	3	0.9375	0.0230717	NOG, ATF5, FGFR3	284	17	20240	12.5766	1	0.542635	0.53713
GOTERM_BP_DIRECT	GO:0014911~positive regulation of smooth muscle cell migration	4	1.25	0.0234965	MYC, BCL2, CYP1B1, TLR4	284	44	20240	6.47887	1	0.542635	0.53713
GOTERM_BP_DIRECT	GO:0050731~positive regulation of peptidyl-tyrosine phosphorylation	6	1.875	0.0235828	EHD4, NRG1, FGFR3, TLR4, LRP8, CD44	284	116	20240	3.68626	1	0.542635	0.53713
GOTERM_BP_DIRECT	GO:0051402~neuron apoptotic process	6	1.875	0.0243641	NR4A3, BCL2, FAS, FGFR3, BCL2L1, AARS	284	117	20240	3.65475	1	0.542635	0.53713
GOTERM_BP_DIRECT	GO:0051726~regulation of cell cycle	10	3.125	0.0248316	TGFB2, CDKN1A, RGCC, CCND2, MYC, DDIT3, BCL2, JADE2, SGK1, GADD45G	284	298	20240	2.39153	1	0.542635	0.53713
GOTERM_BP_DIRECT	GO:0030509~BMP signaling pathway	6	1.875	0.0251619	TMEM100, TGFB2, SFRP2, GDF15, NOG, BMP7	284	118	20240	3.62378	1	0.542635	0.53713
GOTERM_BP_DIRECT	GO:0043434~response to peptide hormone	5	1.5625	0.0258504	NR4A3, IRS1, SERPINA3N, PLD1, BMP7	284	80	20240	4.45423	1	0.542635	0.53713
GOTERM_BP_DIRECT	GO:2000134~negative regulation of G1/S transition of mitotic cell cycle	4	1.25	0.0263911	CDKN1A, FAM107A, BCL2, KLF4	284	46	20240	6.19718	1	0.542635	0.53713
GOTERM_BP_DIRECT	GO:0046326~positive regulation of glucose import	4	1.25	0.0263911	IRS1, IRS2, SORBS1, KLF15	284	46	20240	6.19718	1	0.542635	0.53713
GOTERM_BP_DIRECT	GO:0006351~transcription, DNA-templated	7	2.1875	0.0265432	CEBPB, NR4A3, CEBPD, MYC, CEBPG, TRIB3, KLF4	284	162	20240	3.07946	1	0.542635	0.53713
GOTERM_BP_DIRECT	GO:0009605~response to external stimulus	2	0.625	0.0277696	BCL2, BCL2L1	284	2	20240	71.2676	1	0.542635	0.53713
GOTERM_BP_DIRECT	GO:1902963~negative regulation of metalloendopeptidase activity involved in amyloid precursor protein catabolic process	2	0.625	0.0277696	SORL1, PICALM	284	2	20240	71.2676	1	0.542635	0.53713
GOTERM_BP_DIRECT	GO:0043090~amino acid import	2	0.625	0.0277696	SLC38A1, SLC38A2	284	2	20240	71.2676	1	0.542635	0.53713
GOTERM_BP_DIRECT	GO:0015828~tyrosine transport	2	0.625	0.0277696	SLC7A5, SLC3A2	284	2	20240	71.2676	1	0.542635	0.53713
GOTERM_BP_DIRECT	GO:1905006~negative regulation of epithelial to mesenchymal transition involved in endocardial cushion formation	2	0.625	0.0277696	TGFB2, NOG	284	2	20240	71.2676	1	0.542635	0.53713
GOTERM_BP_DIRECT	GO:0051898~negative regulation of protein kinase B signaling	4	1.25	0.0279067	DDIT3, KLF4, XDH, PHLDA3	284	47	20240	6.06533	1	0.542635	0.53713
GOTERM_BP_DIRECT	GO:0048662~negative regulation of smooth muscle cell proliferation	4	1.25	0.0279067	NPPB, NDRG4, IGFBP3, KLF4	284	47	20240	6.06533	1	0.542635	0.53713
GOTERM_BP_DIRECT	GO:0097192~extrinsic apoptotic signaling pathway in absence of ligand	4	1.25	0.0279067	TGFB2, BCL2, FAS, BCL2L1	284	47	20240	6.06533	1	0.542635	0.53713
GOTERM_BP_DIRECT	GO:0072593~reactive oxygen species metabolic process	4	1.25	0.0279067	NNT, SESN2, DDIT4, BCL2	284	47	20240	6.06533	1	0.542635	0.53713
GOTERM_BP_DIRECT	GO:0014898~cardiac muscle hypertrophy in response to stress	3	0.9375	0.0284842	NPPB, KLF15, MYH7	284	19	20240	11.2528	1	0.542635	0.53713
GOTERM_BP_DIRECT	GO:0008631~intrinsic apoptotic signaling pathway in response to oxidative stress	3	0.9375	0.0284842	ZFP622, BCL2, CYP1B1	284	19	20240	11.2528	1	0.542635	0.53713
GOTERM_BP_DIRECT	GO:0035994~response to muscle stretch	3	0.9375	0.0284842	NFKBIA, ANKRD1, SLC8A1	284	19	20240	11.2528	1	0.542635	0.53713
GOTERM_BP_DIRECT	GO:0010907~positive regulation of glucose metabolic process	3	0.9375	0.0284842	SLC45A3, IRS1, IRS2	284	19	20240	11.2528	1	0.542635	0.53713
GOTERM_BP_DIRECT	GO:0045725~positive regulation of glycogen biosynthetic process	3	0.9375	0.0284842	IRS1, IRS2, SORBS1	284	19	20240	11.2528	1	0.542635	0.53713
GOTERM_BP_DIRECT	GO:0070528~protein kinase C signaling	3	0.9375	0.0284842	CSRP3, ADGRG1, ANKRD1	284	19	20240	11.2528	1	0.542635	0.53713
GOTERM_BP_DIRECT	GO:0007507~heart development	10	3.125	0.0287641	TGFB2, CSRP3, CDKN1A, CXADR, LOX, PRKAR1A, XIRP2, LDB3, NRG1, FREM2	284	306	20240	2.32901	1	0.543402	0.537889
GOTERM_BP_DIRECT	GO:0045471~response to ethanol	6	1.875	0.0294017	RGS2, BCL2, ABAT, PRKCA, NR0B2, TLR4	284	123	20240	3.47647	1	0.550857	0.545268
GOTERM_BP_DIRECT	GO:0045892~negative regulation of transcription, DNA-templated	17	5.3125	0.0299503	CEBPB, CEBPD, ZBTB16, NRG1, POU3F1, KLF4, BMP7, NR0B2, PER1, RASD1, SFRP2, DDIT3, TRIB3, TBL1X, ATF5, ATF3, LGR4	284	679	20240	1.78431	1	0.556536	0.55089
GOTERM_BP_DIRECT	GO:0030036~actin cytoskeleton organization	8	2.5	0.0305251	CSRP3, NRAP, PACSIN2, AGAP2, XIRP2, LDB3, AMOTL2, FLNC	284	213	20240	2.67672	1	0.562605	0.556897
GOTERM_BP_DIRECT	GO:0048546~digestive tract morphogenesis	3	0.9375	0.0313618	SFRP2, BCL2, FGFR3	284	20	20240	10.6901	1	0.568989	0.563216
GOTERM_BP_DIRECT	GO:0009636~response to toxic substance	5	1.5625	0.0313734	BCL2, FAS, CYP1B1, ASNS, ATF4	284	85	20240	4.19221	1	0.568989	0.563216
GOTERM_BP_DIRECT	GO:0071456~cellular response to hypoxia	6	1.875	0.0321494	RGCC, MYC, BCL2, STC1, HIF3A, SLC8A1	284	126	20240	3.3937	1	0.578433	0.572565
GOTERM_BP_DIRECT	GO:0016477~cell migration	10	3.125	0.0336638	TGFB2, ADGRG1, IRS1, S1PR1, BCL2, NRG1, IRS2, SORL1, PTPRF, CD44	284	315	20240	2.26246	1	0.600913	0.594816
GOTERM_BP_DIRECT	GO:0045429~positive regulation of nitric oxide biosynthetic process	4	1.25	0.0361631	TICAM1, KLF4, TLR4, KLF2	284	52	20240	5.48212	1	0.640482	0.633984
GOTERM_BP_DIRECT	GO:0001822~kidney development	7	2.1875	0.0374046	TGFB2, IRX3, ODC1, BCL2, ARID5B, BMP7, FREM2	284	176	20240	2.83451	1	0.643032	0.636508
GOTERM_BP_DIRECT	GO:1903077~negative regulation of protein localization to plasma membrane	3	0.9375	0.0374417	TMBIM1, BCL2L1, PICALM	284	22	20240	9.71831	1	0.643032	0.636508
GOTERM_BP_DIRECT	GO:0006541~glutamine metabolic process	3	0.9375	0.0374417	SLC38A1, ASNS, PHGDH	284	22	20240	9.71831	1	0.643032	0.636508
GOTERM_BP_DIRECT	GO:0045638~negative regulation of myeloid cell differentiation	3	0.9375	0.0374417	NFKBIA, ZFP36, ZBTB16	284	22	20240	9.71831	1	0.643032	0.636508
GOTERM_BP_DIRECT	GO:0034504~protein localization to nucleus	4	1.25	0.0379488	IRS1, ZBTB16, DCLK3, BMP7	284	53	20240	5.37869	1	0.646841	0.640279
GOTERM_BP_DIRECT	GO:0006814~sodium ion transport	6	1.875	0.0391681	SLC4A8, SLC10A6, SLC38A1, SLC38A2, MFSD4B1, SLC8A1	284	133	20240	3.21508	1	0.662642	0.655919
GOTERM_BP_DIRECT	GO:1904036~negative regulation of epithelial cell apoptotic process	3	0.9375	0.0406367	MYC, AGAP2, BCL2	284	23	20240	9.29577	1	0.664977	0.658231
GOTERM_BP_DIRECT	GO:0070427~nucleotide-binding oligomerization domain containing 1 signaling pathway	2	0.625	0.0413649	NFKBIA, TLR4	284	3	20240	47.5117	1	0.664977	0.658231
GOTERM_BP_DIRECT	GO:1903812~L-serine import into cell	2	0.625	0.0413649	SLC1A4, SLC38A2	284	3	20240	47.5117	1	0.664977	0.658231
GOTERM_BP_DIRECT	GO:1902024~L-histidine transport	2	0.625	0.0413649	SLC7A5, SLC3A2	284	3	20240	47.5117	1	0.664977	0.658231
GOTERM_BP_DIRECT	GO:1900625~positive regulation of monocyte aggregation	2	0.625	0.0413649	NR4A3, CD44	284	3	20240	47.5117	1	0.664977	0.658231
GOTERM_BP_DIRECT	GO:2000120~positive regulation of sodium-dependent phosphate transport	2	0.625	0.0413649	CEBPB, ATF4	284	3	20240	47.5117	1	0.664977	0.658231
GOTERM_BP_DIRECT	GO:0009448~gamma-aminobutyric acid metabolic process	2	0.625	0.0413649	ABAT, PHGDH	284	3	20240	47.5117	1	0.664977	0.658231
GOTERM_BP_DIRECT	GO:0045600~positive regulation of fat cell differentiation	4	1.25	0.0416528	CEBPB, ZFP36, SFRP2, ZBTB16	284	55	20240	5.1831	1	0.664977	0.658231
GOTERM_BP_DIRECT	GO:0042542~response to hydrogen peroxide	4	1.25	0.0435705	NR4A3, BCL2, KCNA5, SLC8A1	284	56	20240	5.09054	1	0.681735	0.674819
GOTERM_BP_DIRECT	GO:0006809~nitric oxide biosynthetic process	3	0.9375	0.0439305	CYP1B1, TICAM1, TLR4	284	24	20240	8.90845	1	0.681735	0.674819
GOTERM_BP_DIRECT	GO:2000573~positive regulation of DNA biosynthetic process	3	0.9375	0.0439305	RGCC, MYC, CYP1B1	284	24	20240	8.90845	1	0.681735	0.674819
GOTERM_BP_DIRECT	GO:0045737~positive regulation of cyclin-dependent protein serine/threonine kinase activity	3	0.9375	0.0439305	RGCC, CCND2, MNAT1	284	24	20240	8.90845	1	0.681735	0.674819
GOTERM_BP_DIRECT	GO:0042981~regulation of apoptotic process	8	2.5	0.044206	TGFB2, SFRP2, LOX, MYC, BCL2, FAS, LRP8, BCL2L1	284	231	20240	2.46814	1	0.681735	0.674819
GOTERM_BP_DIRECT	GO:0030838~positive regulation of actin filament polymerization	4	1.25	0.047536	BAIAP2L1, CDC42EP4, BAIAP2, LMOD2	284	58	20240	4.91501	1	0.728135	0.720748
GOTERM_BP_DIRECT	GO:0045778~positive regulation of ossification	3	0.9375	0.0508012	TGFB2, ZBTB16, TOB2	284	26	20240	8.22319	1	0.76175	0.754021
GOTERM_BP_DIRECT	GO:0007411~axon guidance	7	2.1875	0.0517977	SEMA6B, TGFB2, NR4A3, LRTM2, NOG, BMP7, LGR4	284	191	20240	2.6119	1	0.76175	0.754021
GOTERM_BP_DIRECT	GO:0032956~regulation of actin cytoskeleton organization	5	1.5625	0.0518096	TGFB2, BAIAP2L1, FAM107A, BAIAP2, CELSR1	284	100	20240	3.56338	1	0.76175	0.754021
GOTERM_BP_DIRECT	GO:0071230~cellular response to amino acid stimulus	6	1.875	0.0519508	CEBPB, LARS, SESN2, PDGFC, RRAGD, BCL2L1	284	144	20240	2.96948	1	0.76175	0.754021
GOTERM_BP_DIRECT	GO:0006366~transcription from RNA polymerase II promoter	8	2.5	0.0522951	NR4A1, CEBPB, MYC, HIF3A, KLF4, MNAT1, ABRA, ATF4	284	240	20240	2.37559	1	0.76175	0.754021
GOTERM_BP_DIRECT	GO:0007420~brain development	9	2.8125	0.0527221	NDRG4, RGS2, ADGRG1, NOG, DDIT4, S1PR1, IRS2, BAIAP2, POU3F1	284	291	20240	2.20415	1	0.76175	0.754021
GOTERM_BP_DIRECT	GO:0046628~positive regulation of insulin receptor signaling pathway	3	0.9375	0.0543716	IRS1, SORBS1, SORL1	284	27	20240	7.91862	1	0.76175	0.754021
GOTERM_BP_DIRECT	GO:0044344~cellular response to fibroblast growth factor stimulus	3	0.9375	0.0543716	NR4A1, ZFP36, CD44	284	27	20240	7.91862	1	0.76175	0.754021
GOTERM_BP_DIRECT	GO:0051247~positive regulation of protein metabolic process	3	0.9375	0.0543716	NFKBIA, KLF4, KLF2	284	27	20240	7.91862	1	0.76175	0.754021
GOTERM_BP_DIRECT	GO:0033387~putrescine biosynthetic process from ornithine	2	0.625	0.0547707	ODC1, AZIN1	284	4	20240	35.6338	1	0.76175	0.754021
GOTERM_BP_DIRECT	GO:0006564~L-serine biosynthetic process	2	0.625	0.0547707	PSAT1, PHGDH	284	4	20240	35.6338	1	0.76175	0.754021
GOTERM_BP_DIRECT	GO:0043503~skeletal muscle fiber adaptation	2	0.625	0.0547707	ACTA1, MYOZ2	284	4	20240	35.6338	1	0.76175	0.754021
GOTERM_BP_DIRECT	GO:0048133~male germ-line stem cell asymmetric division	2	0.625	0.0547707	ZBTB16, ETV5	284	4	20240	35.6338	1	0.76175	0.754021
GOTERM_BP_DIRECT	GO:2000302~positive regulation of synaptic vesicle exocytosis	2	0.625	0.0547707	SLC4A8, BCL2L1	284	4	20240	35.6338	1	0.76175	0.754021
GOTERM_BP_DIRECT	GO:0071376~cellular response to corticotropin-releasing hormone stimulus	2	0.625	0.0547707	NR4A1, NR4A3	284	4	20240	35.6338	1	0.76175	0.754021
GOTERM_BP_DIRECT	GO:0009612~response to mechanical stimulus	4	1.25	0.0559773	ACTA1, ASNS, KCNA5, LRP11	284	62	20240	4.59791	1	0.764462	0.756706
GOTERM_BP_DIRECT	GO:0030282~bone mineralization	4	1.25	0.0559773	LOX, FGFR3, LGR4, ATF4	284	62	20240	4.59791	1	0.764462	0.756706
GOTERM_BP_DIRECT	GO:0071320~cellular response to cAMP	4	1.25	0.0559773	KCNE1, CYP1B1, STC1, SLC8A1	284	62	20240	4.59791	1	0.764462	0.756706
GOTERM_BP_DIRECT	GO:0043524~negative regulation of neuron apoptotic process	7	2.1875	0.057761	CEBPB, NR4A3, AGAP2, BCL2, MT1, BCL2L1, AARS	284	196	20240	2.54527	1	0.783029	0.775084
GOTERM_BP_DIRECT	GO:0046580~negative regulation of Ras protein signal transduction	3	0.9375	0.0580277	TGFB2, SPRY4, SPRY1	284	28	20240	7.63581	1	0.783029	0.775084
GOTERM_BP_DIRECT	GO:0043410~positive regulation of MAPK cascade	7	2.1875	0.0611892	ZFP622, GDF15, IGFBP3, ROR1, FGFR3, NTSR2, GADD45G	284	199	20240	2.5069	1	0.814097	0.805838
GOTERM_BP_DIRECT	GO:1902042~negative regulation of extrinsic apoptotic signaling pathway via death domain receptors	3	0.9375	0.0617665	SFRP2, TMBIM1, BCL2L1	284	29	20240	7.37251	1	0.814097	0.805838
GOTERM_BP_DIRECT	GO:0060252~positive regulation of glial cell proliferation	3	0.9375	0.0617665	SLC7A5, MYC, ETV5	284	29	20240	7.37251	1	0.814097	0.805838
GOTERM_BP_DIRECT	GO:1904263~positive regulation of TORC1 signaling	3	0.9375	0.0617665	LARS, SESN2, RRAGD	284	29	20240	7.37251	1	0.814097	0.805838
GOTERM_BP_DIRECT	GO:0046716~muscle cell cellular homeostasis	3	0.9375	0.065585	CSRP3, LOX, PRKCA	284	30	20240	7.12676	1	0.82867	0.820263
GOTERM_BP_DIRECT	GO:0045216~cell-cell junction organization	3	0.9375	0.065585	TGFB2, CXADR, XIRP2	284	30	20240	7.12676	1	0.82867	0.820263
GOTERM_BP_DIRECT	GO:0071385~cellular response to glucocorticoid stimulus	3	0.9375	0.065585	ZFP36, FAM107A, STC1	284	30	20240	7.12676	1	0.82867	0.820263
GOTERM_BP_DIRECT	GO:0030154~cell differentiation	23	7.1875	0.0660064	SEMA6B, CEBPB, TNFRSF12A, TENM4, RHBDD1, NOG, IFRD1, TCF23, NRG1, KLF4, BMP7, EDA2R, ETV5, GADD45G, NME1, TMEM100, ADGRG1, CSRP3, SFRP2, FGF18, FGFR3, LGR4, SLC19A2	284	1116	20240	1.46878	1	0.82867	0.820263
GOTERM_BP_DIRECT	GO:0006561~proline biosynthetic process	2	0.625	0.0679897	PYCR1, ALDH18A1	284	5	20240	28.507	1	0.82867	0.820263
GOTERM_BP_DIRECT	GO:0015825~L-serine transport	2	0.625	0.0679897	SLC1A4, SLC38A2	284	5	20240	28.507	1	0.82867	0.820263
GOTERM_BP_DIRECT	GO:0007171~activation of transmembrane receptor protein tyrosine kinase activity	2	0.625	0.0679897	PDGFC, NRG1	284	5	20240	28.507	1	0.82867	0.820263
GOTERM_BP_DIRECT	GO:0070169~positive regulation of biomineral tissue development	2	0.625	0.0679897	CEBPB, ATF4	284	5	20240	28.507	1	0.82867	0.820263
GOTERM_BP_DIRECT	GO:0051387~negative regulation of neurotrophin TRK receptor signaling pathway	2	0.625	0.0679897	SPRY1, PTPRF	284	5	20240	28.507	1	0.82867	0.820263
GOTERM_BP_DIRECT	GO:0009166~nucleotide catabolic process	2	0.625	0.0679897	NT5E, UPP1	284	5	20240	28.507	1	0.82867	0.820263
GOTERM_BP_DIRECT	GO:0006740~NADPH regeneration	2	0.625	0.0679897	NNT, ALDH1L2	284	5	20240	28.507	1	0.82867	0.820263
GOTERM_BP_DIRECT	GO:0036091~positive regulation of transcription from RNA polymerase II promoter in response to oxidative stress	2	0.625	0.0679897	SESN2, ATF4	284	5	20240	28.507	1	0.82867	0.820263
GOTERM_BP_DIRECT	GO:0002246~wound healing involved in inflammatory response	2	0.625	0.0679897	TLR4, CD44	284	5	20240	28.507	1	0.82867	0.820263
GOTERM_BP_DIRECT	GO:0061515~myeloid cell development	2	0.625	0.0679897	CEBPB, PABPC4	284	5	20240	28.507	1	0.82867	0.820263
GOTERM_BP_DIRECT	GO:0030307~positive regulation of cell growth	5	1.5625	0.068644	TGFB2, SFRP2, BCL2, NRG1, SGK1	284	110	20240	3.23944	1	0.83217	0.823727
GOTERM_BP_DIRECT	GO:0050768~negative regulation of neurogenesis	3	0.9375	0.0694803	ATF5, BMP7, SORL1	284	31	20240	6.89687	1	0.837829	0.829329
GOTERM_BP_DIRECT	GO:0042733~embryonic digit morphogenesis	4	1.25	0.0698689	SFRP2, ZBTB16, NOG, FREM2	284	68	20240	4.19221	1	0.838057	0.829554
GOTERM_BP_DIRECT	GO:0001666~response to hypoxia	7	2.1875	0.071143	TGFB2, DDIT4, ACOT2, ABAT, KCNA5, HIF3A, SLC8A1	284	207	20240	2.41002	1	0.848848	0.840236
GOTERM_BP_DIRECT	GO:0010001~glial cell differentiation	3	0.9375	0.0734494	NRG1, POU3F1, KLF15	284	32	20240	6.68134	1	0.853897	0.845234
GOTERM_BP_DIRECT	GO:0055001~muscle cell development	3	0.9375	0.0734494	LOX, FLNC, SLC8A1	284	32	20240	6.68134	1	0.853897	0.845234
GOTERM_BP_DIRECT	GO:2001240~negative regulation of extrinsic apoptotic signaling pathway in absence of ligand	3	0.9375	0.0734494	AGAP2, BCL2, NRG1	284	32	20240	6.68134	1	0.853897	0.845234
GOTERM_BP_DIRECT	GO:0048738~cardiac muscle tissue development	3	0.9375	0.0734494	CSRP3, NRG1, BMP7	284	32	20240	6.68134	1	0.853897	0.845234
GOTERM_BP_DIRECT	GO:0045662~negative regulation of myoblast differentiation	3	0.9375	0.0734494	CSRP3, NMRK2, DDIT3	284	32	20240	6.68134	1	0.853897	0.845234
GOTERM_BP_DIRECT	GO:0009791~post-embryonic development	5	1.5625	0.0741822	CSRNP1, BCL2, ARID5B, ATF5, SLC8A1	284	113	20240	3.15343	1	0.858015	0.84931
GOTERM_BP_DIRECT	GO:0010506~regulation of autophagy	4	1.25	0.0748133	DDIT3, RRAGD, BCL2, TRIB3	284	70	20240	4.07243	1	0.860923	0.852188
GOTERM_BP_DIRECT	GO:0032869~cellular response to insulin stimulus	5	1.5625	0.0760772	IRS1, TRIB3, IRS2, SORBS1, SGK1	284	114	20240	3.12577	1	0.868465	0.859654
GOTERM_BP_DIRECT	GO:0009410~response to xenobiotic stimulus	9	2.8125	0.0781393	TGFB2, SFRP2, LOX, PDE3A, BCL2, ABAT, LRP8, SLC8A1, NPAS2	284	317	20240	2.02337	1	0.868465	0.859654
GOTERM_BP_DIRECT	GO:0008286~insulin receptor signaling pathway	4	1.25	0.0799084	CSRP3, IRS1, IRS2, SORBS1	284	72	20240	3.95931	1	0.868465	0.859654
GOTERM_BP_DIRECT	GO:0006898~receptor-mediated endocytosis	4	1.25	0.0799084	ARHGAP27, SORL1, CD44, PICALM	284	72	20240	3.95931	1	0.868465	0.859654
GOTERM_BP_DIRECT	GO:0009887~animal organ morphogenesis	6	1.875	0.080403	PRKAR1A, PDGFC, FGF18, BCL2, LAMC2, BMP7	284	164	20240	2.60735	1	0.868465	0.859654
GOTERM_BP_DIRECT	GO:0009449~gamma-aminobutyric acid biosynthetic process	2	0.625	0.0810245	SLC38A1, ABAT	284	6	20240	23.7559	1	0.868465	0.859654
GOTERM_BP_DIRECT	GO:0006751~glutathione catabolic process	2	0.625	0.0810245	DPEP1, CHAC1	284	6	20240	23.7559	1	0.868465	0.859654
GOTERM_BP_DIRECT	GO:0070227~lymphocyte apoptotic process	2	0.625	0.0810245	BCL2, FAS	284	6	20240	23.7559	1	0.868465	0.859654
GOTERM_BP_DIRECT	GO:0055129~L-proline biosynthetic process	2	0.625	0.0810245	PYCR1, ALDH18A1	284	6	20240	23.7559	1	0.868465	0.859654
GOTERM_BP_DIRECT	GO:0071499~cellular response to laminar fluid shear stress	2	0.625	0.0810245	KLF4, KLF2	284	6	20240	23.7559	1	0.868465	0.859654
GOTERM_BP_DIRECT	GO:0032328~alanine transport	2	0.625	0.0810245	SLC7A5, SLC38A2	284	6	20240	23.7559	1	0.868465	0.859654
GOTERM_BP_DIRECT	GO:0044206~UMP salvage	2	0.625	0.0810245	UCK2, UPP1	284	6	20240	23.7559	1	0.868465	0.859654
GOTERM_BP_DIRECT	GO:0070487~monocyte aggregation	2	0.625	0.0810245	BMP7, CD44	284	6	20240	23.7559	1	0.868465	0.859654
GOTERM_BP_DIRECT	GO:0046985~positive regulation of hemoglobin biosynthetic process	2	0.625	0.0810245	SLC6A9, KLF4	284	6	20240	23.7559	1	0.868465	0.859654
GOTERM_BP_DIRECT	GO:0002053~positive regulation of mesenchymal cell proliferation	3	0.9375	0.0815982	IRS1, MYC, IRS2	284	34	20240	6.28832	1	0.868465	0.859654
GOTERM_BP_DIRECT	GO:0030100~regulation of endocytosis	3	0.9375	0.0815982	EHD4, PACSIN2, PICALM	284	34	20240	6.28832	1	0.868465	0.859654
GOTERM_BP_DIRECT	GO:0051973~positive regulation of telomerase activity	3	0.9375	0.0857723	PARM1, MYC, KLF4	284	35	20240	6.10865	1	0.904399	0.895224
GOTERM_BP_DIRECT	GO:0043388~positive regulation of DNA binding	3	0.9375	0.0857723	MYC, TLR4, NME1	284	35	20240	6.10865	1	0.904399	0.895224
GOTERM_BP_DIRECT	GO:0007155~cell adhesion	14	4.375	0.0886785	COL28A1, CXADR, TNFRSF12A, PCDH20, LAMC2, PRKCA, CELSR1, PTPRF, ADGRG1, CDH20, PERP, CYP1B1, FREM2, CD44	284	611	20240	1.63297	1	0.930714	0.921271
GOTERM_BP_DIRECT	GO:0006730~one-carbon metabolic process	3	0.9375	0.0900095	MTHFD2, ALDH1L2, CAR4	284	36	20240	5.93897	1	0.936016	0.92652
GOTERM_BP_DIRECT	GO:0050919~negative chemotaxis	3	0.9375	0.0900095	SEMA6B, LRTM2, LGR4	284	36	20240	5.93897	1	0.936016	0.92652
GOTERM_BP_DIRECT	GO:0048666~neuron development	4	1.25	0.0905347	TGFB2, ATP8A2, TENM4, DPYSL3	284	76	20240	3.75093	1	0.937178	0.92767
GOTERM_BP_DIRECT	GO:0001955~blood vessel maturation	2	0.625	0.0938776	DDIT3, S1PR1	284	7	20240	20.3622	1	0.945992	0.936394
GOTERM_BP_DIRECT	GO:0035666~TRIF-dependent toll-like receptor signaling pathway	2	0.625	0.0938776	TICAM1, TLR4	284	7	20240	20.3622	1	0.945992	0.936394
GOTERM_BP_DIRECT	GO:0032354~response to follicle-stimulating hormone	2	0.625	0.0938776	CYP1B1, ASNS	284	7	20240	20.3622	1	0.945992	0.936394
GOTERM_BP_DIRECT	GO:0032608~interferon-beta production	2	0.625	0.0938776	TICAM1, TLR4	284	7	20240	20.3622	1	0.945992	0.936394
GOTERM_BP_DIRECT	GO:0000079~regulation of cyclin-dependent protein serine/threonine kinase activity	3	0.9375	0.0943071	CDKN1A, CCND2, MNAT1	284	37	20240	5.77845	1	0.945992	0.936394
GOTERM_BP_DIRECT	GO:0051881~regulation of mitochondrial membrane potential	3	0.9375	0.0943071	BCL2, PYCR1, BCL2L1	284	37	20240	5.77845	1	0.945992	0.936394
GOTERM_BP_DIRECT	GO:0043552~positive regulation of phosphatidylinositol 3-kinase activity	3	0.9375	0.0943071	IRS1, AGAP2, FGFR3	284	37	20240	5.77845	1	0.945992	0.936394
GOTERM_BP_DIRECT	GO:0048741~skeletal muscle fiber development	3	0.9375	0.0986626	RCAN1, ACTA1, BCL2	284	38	20240	5.62639	1	0.966107	0.956305
GOTERM_BP_DIRECT	GO:0071773~cellular response to BMP stimulus	3	0.9375	0.0986626	TMEM100, NOG, BMP7	284	38	20240	5.62639	1	0.966107	0.956305
GOTERM_BP_DIRECT	GO:0010667~negative regulation of cardiac muscle cell apoptotic process	3	0.9375	0.0986626	SFRP2, BCL2, NRG1	284	38	20240	5.62639	1	0.966107	0.956305
GOTERM_BP_DIRECT	GO:2000379~positive regulation of reactive oxygen species metabolic process	3	0.9375	0.0986626	CDKN1A, CYP1B1, XDH	284	38	20240	5.62639	1	0.966107	0.956305
GOTERM_BP_DIRECT	GO:0006469~negative regulation of protein kinase activity	4	1.25	0.0988693	PRKAR1A, TRIB3, PRKCA, GADD45G	284	79	20240	3.60849	1	0.966107	0.956305
GOTERM_BP_DIRECT	GO:0045669~positive regulation of osteoblast differentiation	4	1.25	0.0988693	CEBPB, SFRP2, CEBPD, BMP7	284	79	20240	3.60849	1	0.966107	0.956305

## Sheet: GO_BP_downregulated genes
Category	Term	Count	%	PValue	Genes	List Total	Pop Hits	Pop Total	Fold Enrichment	Bonferroni	Benjamini	FDR
GOTERM_BP_DIRECT	GO:0034765~regulation of ion transmembrane transport	12	4.93827	4.09184e-07	CACNG6, KCNH2, KCNV2, SCN10A, KCND2, CLCNKB, SCN4A, KCNA7, SCN4B, CLCN1, KCNJ2, KCNJ3	216	144	20240	7.80864	0.000613588	0.000613776	0.000612958
GOTERM_BP_DIRECT	GO:0006811~ion transport	21	8.64198	7.28806e-06	KCNH2, SLC22A3, KCND2, CLCNKB, WNK4, SLC40A1, PKD2L2, KCNA7, LRRC55, CLCN1, CACNG6, P2RX6, SCN10A, KCNV2, SLC17A7, SCN4A, CNGA3, SCN4B, KCNJ2, SLC26A6, KCNJ3	216	603	20240	3.26331	0.0108726	0.00546604	0.00545876
GOTERM_BP_DIRECT	GO:0055085~transmembrane transport	17	6.99588	2.99449e-05	KCNH2, SLC22A3, SLC37A2, KCND2, CLCNKB, ANO8, KCNA7, ABCA12, CLCN1, SCN10A, KCNV2, MFSD3, ANO10, SLC17A7, SCN4A, CNGA3, SLC26A6	216	454	20240	3.50873	0.0439241	0.0149724	0.0149525
GOTERM_BP_DIRECT	GO:0006821~chloride transport	7	2.88066	0.000310643	WNK4, ANO8, CLCNKB, ANO10, SLC17A7, CLCN1, SLC26A6	216	86	20240	7.62705	0.372516	0.10261	0.102473
GOTERM_BP_DIRECT	GO:0071805~potassium ion transmembrane transport	8	3.29218	0.000401582	SLC9A2, KCNH2, KCNV2, KCND2, WNK4, KCNA7, LRRC55, KCNJ2	216	126	20240	5.94944	0.452555	0.10261	0.102473
GOTERM_BP_DIRECT	GO:0051649~establishment of localization in cell	10	4.11523	0.000410439	SLC22A3, SCN10A, WHRN, SLC40A1, SLC17A7, AKAP5, ABCA12, CORO1A, SCN4B, SLC26A6	216	209	20240	4.48343	0.459783	0.10261	0.102473
GOTERM_BP_DIRECT	GO:0006813~potassium ion transport	8	3.29218	0.000663281	KCNH2, KCNV2, KCND2, SLC17A7, SCN4A, KCNA7, KCNJ2, KCNJ3	216	137	20240	5.47175	0.63037	0.142132	0.141942
GOTERM_BP_DIRECT	GO:0051260~protein homooligomerization	7	2.88066	0.00268152	PYCARD, KCNV2, KCND2, NACC2, KCNA7, GM12250, LZTS3	216	130	20240	5.04558	0.982185	0.47753	0.476893
GOTERM_BP_DIRECT	GO:0035725~sodium ion transmembrane transport	6	2.46914	0.00286518	SLC9A2, SCN10A, SLC6A17, WNK4, SCN4A, SCN4B	216	91	20240	6.17827	0.986485	0.47753	0.476893
GOTERM_BP_DIRECT	GO:0006749~glutathione metabolic process	5	2.05761	0.00836102	HMGN5, MGST1, HBB-BT, HBB-BS, OPLAH	216	75	20240	6.24691	0.999997	1	0.999333
GOTERM_BP_DIRECT	GO:0042593~glucose homeostasis	7	2.88066	0.00895403	NGFR, MLXIPL, IGFBP5, ALOX5, ADIPOQ, ADRA1B, GCK	216	167	20240	3.9277	0.999999	1	0.999333
GOTERM_BP_DIRECT	GO:0019233~sensory perception of pain	5	2.05761	0.00957462	NGFR, SCN10A, KCND2, ALOX5, CRHR2	216	78	20240	6.00665	0.999999	1	0.999333
GOTERM_BP_DIRECT	GO:0086010~membrane depolarization during action potential	3	1.23457	0.0122197	KCNH2, SCN10A, SCN4A	216	16	20240	17.5694	1	1	0.999333
GOTERM_BP_DIRECT	GO:0035970~peptidyl-threonine dephosphorylation	3	1.23457	0.0122197	PDP1, DUSP10, PDP2	216	16	20240	17.5694	1	1	0.999333
GOTERM_BP_DIRECT	GO:0007275~multicellular organism development	21	8.64198	0.0133379	RET, NGFR, SEMA6C, ANGPT1, TCF15, DIXDC1, MEOX2, NPNT, KLHL40, HIC1, CELSR3, CDH4, EFNB3, IFT81, PSME4, ITGA8, APLNR, MDGA1, NES, GPR157, HTATIP2	216	1098	20240	1.79215	1	1	0.999333
GOTERM_BP_DIRECT	GO:0071466~cellular response to xenobiotic stimulus	5	2.05761	0.0133535	KCNH2, ADIPOQ, WNK4, PDE4A, AKAP5	216	86	20240	5.44789	1	1	0.999333
GOTERM_BP_DIRECT	GO:0006836~neurotransmitter transport	4	1.64609	0.0135984	SLC22A3, SLC6A17, SLC17A7, SLC29A2	216	47	20240	7.97478	1	1	0.999333
GOTERM_BP_DIRECT	GO:0050918~positive chemotaxis	3	1.23457	0.013753	ANGPT1, PLXNB3, CORO1A	216	17	20240	16.5359	1	1	0.999333
GOTERM_BP_DIRECT	GO:0030198~extracellular matrix organization	7	2.88066	0.0143178	EGFLAM, COL11A2, COL4A6, ITGA8, COL6A6, NPNT, MMP9	216	185	20240	3.54555	1	1	0.999333
GOTERM_BP_DIRECT	GO:0042488~positive regulation of odontogenesis of dentin-containing tooth	2	0.823045	0.0211327	NGFR, CSF1	216	2	20240	93.7037	1	1	0.999333
GOTERM_BP_DIRECT	GO:0007399~nervous system development	11	4.52675	0.0212212	RET, NGFR, SEMA6C, RBFOX1, CTF1, EFNB3, ITGA8, PLXNB3, NES, MDGA1, GFRA4	216	445	20240	2.31627	1	1	0.999333
GOTERM_BP_DIRECT	GO:0006629~lipid metabolic process	15	6.17284	0.02366	NAA40, MID1IP1, FITM1, ACSM5, PM20D1, CYP26A1, RIDA, CES1D, ALOX5, B3GALT2, ENPP2, AOX1, PLIN1, CYP2E1, FDFT1	216	727	20240	1.93336	1	1	0.999333
GOTERM_BP_DIRECT	GO:0098869~cellular oxidant detoxification	3	1.23457	0.0287015	HBB-BT, HBA-A1, HBB-BS	216	25	20240	11.2444	1	1	0.999333
GOTERM_BP_DIRECT	GO:0045821~positive regulation of glycolytic process	3	1.23457	0.0308795	MLXIPL, ENTPD5, GCK	216	26	20240	10.812	1	1	0.999333
GOTERM_BP_DIRECT	GO:0090076~relaxation of skeletal muscle	2	0.823045	0.0315318	KBTBD13, KCNJ2	216	3	20240	62.4691	1	1	0.999333
GOTERM_BP_DIRECT	GO:2000721~positive regulation of transcription from RNA polymerase II promoter involved in smooth muscle cell differentiation	2	0.823045	0.0315318	ITGA8, NPNT	216	3	20240	62.4691	1	1	0.999333
GOTERM_BP_DIRECT	GO:0031339~negative regulation of vesicle fusion	2	0.823045	0.0315318	TBC1D4, CORO1A	216	3	20240	62.4691	1	1	0.999333
GOTERM_BP_DIRECT	GO:0032869~cellular response to insulin stimulus	5	2.05761	0.0334461	TBC1D4, ADIPOQ, EPRS, GCK, SLC29A2	216	114	20240	4.10981	1	1	0.999333
GOTERM_BP_DIRECT	GO:0050731~positive regulation of peptidyl-tyrosine phosphorylation	5	2.05761	0.0353156	IGHM, ANGPT1, IL15, ADIPOQ, ENPP2	216	116	20240	4.03895	1	1	0.999333
GOTERM_BP_DIRECT	GO:0042744~hydrogen peroxide catabolic process	3	1.23457	0.0377866	HBB-BT, HBA-A1, HBB-BS	216	29	20240	9.69349	1	1	0.999333
GOTERM_BP_DIRECT	GO:0086016~AV node cell action potential	2	0.823045	0.0418209	SCN10A, SCN4B	216	4	20240	46.8519	1	1	0.999333
GOTERM_BP_DIRECT	GO:0086013~membrane repolarization during cardiac muscle cell action potential	2	0.823045	0.0418209	KCNH2, KCNJ2	216	4	20240	46.8519	1	1	0.999333
GOTERM_BP_DIRECT	GO:0086001~cardiac muscle cell action potential	2	0.823045	0.0418209	KCND2, KCNJ2	216	4	20240	46.8519	1	1	0.999333
GOTERM_BP_DIRECT	GO:0010875~positive regulation of cholesterol efflux	3	1.23457	0.0478097	CES1D, ADIPOQ, ABCA12	216	33	20240	8.51852	1	1	0.999333
GOTERM_BP_DIRECT	GO:1904184~positive regulation of pyruvate dehydrogenase activity	2	0.823045	0.0520012	PDP1, PDP2	216	5	20240	37.4815	1	1	0.999333
GOTERM_BP_DIRECT	GO:1901388~regulation of transforming growth factor beta activation	2	0.823045	0.0520012	ITGB6, LRRC32	216	5	20240	37.4815	1	1	0.999333
GOTERM_BP_DIRECT	GO:0007171~activation of transmembrane receptor protein tyrosine kinase activity	2	0.823045	0.0520012	ANGPT1, PRLR	216	5	20240	37.4815	1	1	0.999333
GOTERM_BP_DIRECT	GO:0007411~axon guidance	6	2.46914	0.0533318	RTN4R, NGFR, LAMA5, SEMA6C, CDH4, EFNB3	216	191	20240	2.94357	1	1	0.999333
GOTERM_BP_DIRECT	GO:0006814~sodium ion transport	5	2.05761	0.0536111	SLC9A2, SCN10A, SLC17A7, SCN4A, SCN4B	216	133	20240	3.5227	1	1	0.999333
GOTERM_BP_DIRECT	GO:0042102~positive regulation of T cell proliferation	4	1.64609	0.0551858	SPTA1, IL15, PRKCQ, CORO1A	216	81	20240	4.62734	1	1	0.999333
GOTERM_BP_DIRECT	GO:0006003~fructose 2,6-bisphosphate metabolic process	2	0.823045	0.0620739	PFKFB1, GCK	216	6	20240	31.2346	1	1	0.999333
GOTERM_BP_DIRECT	GO:0032811~negative regulation of epinephrine secretion	2	0.823045	0.0620739	GCK, CRHR2	216	6	20240	31.2346	1	1	0.999333
GOTERM_BP_DIRECT	GO:0018120~peptidyl-arginine ADP-ribosylation	2	0.823045	0.0620739	ART1, ART5	216	6	20240	31.2346	1	1	0.999333
GOTERM_BP_DIRECT	GO:0044546~NLRP3 inflammasome complex assembly	2	0.823045	0.0620739	PYCARD, ATAT1	216	6	20240	31.2346	1	1	0.999333
GOTERM_BP_DIRECT	GO:0019318~hexose metabolic process	2	0.823045	0.0620739	GALM, GCK	216	6	20240	31.2346	1	1	0.999333
GOTERM_BP_DIRECT	GO:0033627~cell adhesion mediated by integrin	3	1.23457	0.0644003	ITGA8, ITGA7, ITGB6	216	39	20240	7.20798	1	1	0.999333
GOTERM_BP_DIRECT	GO:0050778~positive regulation of immune response	3	1.23457	0.0644003	IGHM, IL15, CFP	216	39	20240	7.20798	1	1	0.999333
GOTERM_BP_DIRECT	GO:0086091~regulation of heart rate by cardiac conduction	3	1.23457	0.0644003	KCNH2, SCN4B, KCNJ2	216	39	20240	7.20798	1	1	0.999333
GOTERM_BP_DIRECT	GO:0050870~positive regulation of T cell activation	3	1.23457	0.0673295	PYCARD, PRKCQ, CORO1A	216	40	20240	7.02778	1	1	0.999333
GOTERM_BP_DIRECT	GO:0010977~negative regulation of neuron projection development	4	1.64609	0.0691512	RTN4R, NGFR, CD38, RGMA	216	89	20240	4.2114	1	1	0.999333
GOTERM_BP_DIRECT	GO:0006954~inflammatory response	9	3.7037	0.0719925	PYCARD, PTGFR, CSF1, IL15, ALOX5, WNK4, PRKCQ, ITGB6, PF4	216	410	20240	2.05691	1	1	0.999333
GOTERM_BP_DIRECT	GO:0016202~regulation of striated muscle tissue development	2	0.823045	0.07204	CENPF, RPL3L	216	7	20240	26.7725	1	1	0.999333
GOTERM_BP_DIRECT	GO:1990573~potassium ion import across plasma membrane	3	1.23457	0.0794681	KCNH2, KCNJ2, KCNJ3	216	44	20240	6.38889	1	1	0.999333
GOTERM_BP_DIRECT	GO:0007160~cell-matrix adhesion	4	1.64609	0.0825458	ITGA8, ITGA7, ITGB6, NPNT	216	96	20240	3.90432	1	1	0.999333
GOTERM_BP_DIRECT	GO:0009888~tissue development	3	1.23457	0.0826022	LAMA5, EGFLAM, LAMC3	216	45	20240	6.24691	1	1	0.999333
GOTERM_BP_DIRECT	GO:0007601~visual perception	5	2.05761	0.0833762	RP1, OPN4, LAMC3, CRYBB1, CNGA3	216	155	20240	3.0227	1	1	0.999333
GOTERM_BP_DIRECT	GO:0008360~regulation of cell shape	5	2.05761	0.0849087	SPTA1, PLXNB3, ITGA7, ARHGAP18, CORO1A	216	156	20240	3.00332	1	1	0.999333
GOTERM_BP_DIRECT	GO:0007179~transforming growth factor beta receptor signaling pathway	4	1.64609	0.0865634	ITGA8, ITGB6, LRRC32, NPNT	216	98	20240	3.82464	1	1	0.999333
GOTERM_BP_DIRECT	GO:0007166~cell surface receptor signaling pathway	6	2.46914	0.0871901	RTN4R, CTF1, CELSR3, GPR157, CRHR2, GFRA4	216	221	20240	2.54399	1	1	0.999333
GOTERM_BP_DIRECT	GO:0016525~negative regulation of angiogenesis	4	1.64609	0.088603	NGFR, ALOX5, PF4, CRHR2	216	99	20240	3.78601	1	1	0.999333
GOTERM_BP_DIRECT	GO:0030890~positive regulation of B cell proliferation	3	1.23457	0.0955015	IGHM, CD38, PRLR	216	49	20240	5.73696	1	1	0.999333
GOTERM_BP_DIRECT	GO:0019228~neuronal action potential	3	1.23457	0.0988115	SCN10A, KCND2, SCN4A	216	50	20240	5.62222	1	1	0.999333
GOTERM_BP_DIRECT	GO:0007015~actin filament organization	5	2.05761	0.0991463	KBTBD13, CNN1, TMOD4, CORO1A, CRHR2	216	165	20240	2.83951	1	1	0.999333
GOTERM_BP_DIRECT	GO:0009617~response to bacterium	7	2.88066	0.0995862	PYCARD, ADIPOQ, HBA-A2, HBA-A1, CYP2E1, PRLR, GM12250	216	299	20240	2.19373	1	1	0.999333

## Sheet: GO_CC_upregulated genes
Category	Term	Count	%	PValue	Genes	List Total	Pop Hits	Pop Total	Fold Enrichment	Bonferroni	Benjamini	FDR
GOTERM_CC_DIRECT	GO:0005737~cytoplasm	161	50.3125	4.13738e-11	DCLRE1B, CARS, MIDN, RPL3, IRS1, CPNE7, RASEF, FAM107A, IRS2, ALDH1L2, ABRA, BACH2, NPPB, RGS2, ZFP36, BAIAP2L1, CCND2, MYC, SESN2, DPYSL3, CHAC1, GLUL, MYOZ2, PHLDA1, AGFG2, PHLDA3, CXADR, ARRDC2, IFRD1, SARS, PRKCA, TICAM1, RBP7, PRKAR1A, DDIT3, HECW2, RRAGD, DDIT4, ACOT2, TTLL11, ROR1, ATF5, RNF122, ATF4, FKBP5, ZFP622, NDRG4, BRI3, AGAP2, AGAP1, STC1, PLD1, NPAS2, SULT1A1, LARS, PDGFC, PACSIN…	297	7529	21208	1.52697	1.4274e-08	1.4274e-08	1.38602e-08
GOTERM_CC_DIRECT	GO:0030018~Z disc	11	3.4375	4.25441e-05	CSRP3, KCNE1, SYNPO2L, NRAP, XIRP2, LDB3, KCNA5, FLNC, MYOZ2, SLC8A1, MYH7	297	147	21208	5.34341	0.0145708	0.00733885	0.00712613
GOTERM_CC_DIRECT	GO:0005829~cytosol	89	27.8125	0.000153982	CARS, CDKN1A, MIDN, RPL3, SH2D4A, IRS1, RASEF, IRS2, HIF3A, BACH2, RGS2, ZFP36, CSRP3, CCND2, BAIAP2L1, DPYSL3, ANKRD1, CHAC1, RRP12, UPP1, GLUL, TRP53INP1, PABPC4, SARS, PRKCA, TICAM1, CKAP4, NME1, GCHFR, SLC7A5, RBP7, SYNPO2L, PRKAR1A, DDIT4, ACOT2, WDFY1, GARS, SGK1, EEF1E1, ATF5, CD44, FKBP5, ZFP622, NDRG4, PARM1, ODC1, AGAP2, AGAP1, NT5C2, TOB2, NPAS2, SULT1A1, CYB5R1, NT5E, LARS, PDGFC, PAC…	297	4404	21208	1.44307	0.0517414	0.017708	0.0171947
GOTERM_CC_DIRECT	GO:0048471~perinuclear region of cytoplasm	26	8.125	0.000306505	CDKN1A, BRI3, RASEF, ODC1, LDB3, LAMC2, KCNA5, PLD1, NPPB, TMEM100, RASD1, MYC, STBD1, CAR4, PRKCA, MYRIP, SORL1, CKAP4, NME1, EHD4, BCL2, FAS, SGK1, TLR4, FGFR3, PICALM	297	836	21208	2.2208	0.10036	0.024453	0.0237442
GOTERM_CC_DIRECT	GO:0005634~nucleus	120	37.5	0.000354392	DCLRE1B, MIDN, RPL3, IRS1, CPNE7, FAM107A, BACH2, NPPB, RGS2, ZFP36, CCND2, MYC, SESN2, CYP1B1, PHLDA1, ZFP697, CXADR, IGFBP3, IFRD1, SARS, ARID5B, PRKCA, POU3F1, RBP7, LOX, DDIT3, RRAGD, WDFY1, TRIB3, MAML3, ATF5, TSPYL4, ATF3, ATF4, FKBP5, ZFP622, CSTF3, AGAP2, AGAP1, STC1, PLCXD2, NPAS2, ZMAT3, PDGFC, YARS, ZBTB16, DCLK3, AMMECR1, IRF2BP2, MT1, ADAP1, NR0B2, AZIN1, GADD45G, NFKBIA, NR4A1, RCAN…	297	6536	21208	1.31103	0.115105	0.024453	0.0237442
GOTERM_CC_DIRECT	GO:0090575~RNA polymerase II transcription factor complex	9	2.8125	0.000628156	CEBPB, CEBPD, DDIT3, CEBPG, MAFF, ATF5, ATF3, BACH2, ATF4	297	135	21208	4.76049	0.194894	0.036119	0.035072
GOTERM_CC_DIRECT	GO:0005654~nucleoplasm	72	22.5	0.00133815	DCLRE1B, CDKN1A, ATP8A2, IRS1, HIF3A, JADE2, CELSR1, ALDH1L2, SLC8A1, BACH2, RBM3, CSRP3, CCND2, BAIAP2L1, NMRK2, MYC, ENC1, ANKRD1, UPP1, PHLDA1, DUSP4, CXADR, AEN, NRG1, POU3F1, KLF15, ETV5, GCHFR, SYNPO2L, DDIT3, RRAGD, DPEP1, TRIB3, MAML3, EEF1E1, ATF5, ATF3, ATF4, FKBP5, ZFP622, CEBPB, PARM1, ZFP422, CEBPD, CSTF3, CEBPG, AGAP2, SLC3A2, NPAS2, NT5E, ZMAT3, S1PR1, TBL1X, RPS27A, NOP58, NIFK, A…	297	3613	21208	1.42301	0.36996	0.0659519	0.0640402
GOTERM_CC_DIRECT	GO:0001725~stress fiber	7	2.1875	0.00154871	ACTA1, FAM107A, XIRP2, LDB3, ROR1, SORBS1, MYH7	297	89	21208	5.61631	0.414166	0.0667881	0.0648522
GOTERM_CC_DIRECT	GO:0005768~endosome	22	6.875	0.00178612	TGFB2, ATP8A2, PARM1, ABCA5, AGAP2, ARHGAP27, TICAM1, PLD1, SORL1, PTPRF, PTP4A1, EHD4, SLC6A9, TMBIM1, PACSIN2, ACKR4, S1PR1, WDFY1, AMOTL2, ATP13A3, TLR4, PICALM	297	741	21208	2.12006	0.460311	0.0684678	0.0664833
GOTERM_CC_DIRECT	GO:0016323~basolateral plasma membrane	12	3.75	0.002429	SLC4A8, SLC7A5, NDRG4, SLC38A1, CXADR, SLC7A8, SLC6A9, SLC43A2, SLC43A3, SLC3A2, CD44, SLC8A1	297	287	21208	2.98568	0.567868	0.0769631	0.0747323
GOTERM_CC_DIRECT	GO:0016324~apical plasma membrane	16	5	0.00245389	CLIC5, KCNE1, STC1, SLC3A2, NRG1, MYRIP, PLD1, SLC7A5, SLC6A9, SLC7A8, DPEP1, FAS, AMOTL2, MFSD4B1, CD44, CAR4	297	466	21208	2.45176	0.571573	0.0769631	0.0747323
GOTERM_CC_DIRECT	GO:0015629~actin cytoskeleton	11	3.4375	0.00408896	ACTA1, CLIC5, BAIAP2L1, SYNPO2L, CDC42EP4, FAM107A, MYRIP, FLNC, BAIAP2, MYOZ2, ABRA	297	264	21208	2.97531	0.75673	0.117558	0.11415
GOTERM_CC_DIRECT	GO:0030017~sarcomere	5	1.5625	0.00446566	ACTA1, TIMP4, ABRA, LMOD2, MYH7	297	48	21208	7.43827	0.786497	0.118512	0.115077
GOTERM_CC_DIRECT	GO:0030016~myofibril	5	1.5625	0.00517194	NRAP, ANKRD1, ABRA, LMOD2, MYH7	297	50	21208	7.14074	0.832865	0.127451	0.123757
GOTERM_CC_DIRECT	GO:0017101~aminoacyl-tRNA synthetase multienzyme complex	3	0.9375	0.0116831	LARS, IARS, EEF1E1	297	12	21208	17.8519	0.982654	0.268712	0.260923
GOTERM_CC_DIRECT	GO:0042383~sarcolemma	7	2.1875	0.0139197	FAS, FLNC, SLC38A2, SNTB1, SLC8A1, SNTA1, CAR4	297	140	21208	3.57037	0.992061	0.300142	0.291443
GOTERM_CC_DIRECT	GO:0043005~neuron projection	16	5	0.0170344	NMB, CXADR, TENM4, FAM107A, ABAT, PRKCA, BAIAP2, PTPRF, SLC4A8, RGS2, GNB3, FAS, SGK1, GLUL, ATF4, PICALM	297	582	21208	1.96309	0.997335	0.345698	0.335677
GOTERM_CC_DIRECT	GO:0009986~cell surface	20	6.25	0.0203858	TGFB2, KCNE1, TNFRSF12A, SLC3A2, KCNA5, LRP8, SORL1, CKAP4, ADAMTS15, NT5E, PDGFC, FAS, ROR1, FGFR3, TLR4, RAMP1, CD44, NTSR2, PICALM, CAR4	297	814	21208	1.75448	0.99918	0.353519	0.343272
GOTERM_CC_DIRECT	GO:0031985~Golgi cisterna	3	0.9375	0.0204776	GCNT1, PLD1, SORL1	297	16	21208	13.3889	0.999206	0.353519	0.343272
GOTERM_CC_DIRECT	GO:0031594~neuromuscular junction	6	1.875	0.0204939	CXADR, PRKAR1A, NRG1, COLQ, DLGAP4, SNTA1	297	112	21208	3.8254	0.99921	0.353519	0.343272
GOTERM_CC_DIRECT	GO:0005769~early endosome	11	3.4375	0.0224405	PTP4A1, RNF157, PARM1, EHD4, PACSIN2, ACKR4, WDFY1, TICAM1, SORL1, TLR4, PICALM	297	342	21208	2.29673	0.999602	0.367821	0.35716
GOTERM_CC_DIRECT	GO:0005667~transcription factor complex	10	3.125	0.02591	NR4A1, NR4A3, ANKRD1, TFCP2L1, TBL1X, KLF4, ATF5, POU3F1, NPAS2, ATF4	297	301	21208	2.37234	0.999883	0.367821	0.35716
GOTERM_CC_DIRECT	GO:0016020~membrane	127	39.6875	0.026583	ATP8A2, GPR68, CPNE7, FAM107A, KLHDC7A, CELSR1, SLC8A1, FADS3, RGS2, CCND2, SLC16A6, CYP1B1, GLUL, MFSD4B1, CAR4, PHLDA3, SEMA6B, SLC38A1, CXADR, LMAN1L, GLCE, HPCAL1, GPR75, SHISA4, PRKCA, TMEM82, PRKAR1A, DPEP1, ROR1, RNF122, FREM2, ATF4, KCNE1, HACD1, PARM1, SLC45A3, BRI3, SLC1A4, PLD1, CYB5R1, ADGRG1, CDH20, PDGFC, PACSIN2, THEM4, SLC38A2, NTSR2, SLC19A2, SLC10A6, SLC37A1, ABCA5, RHBDD1, PCDH…	297	7842	21208	1.15643	0.999908	0.367821	0.35716
GOTERM_CC_DIRECT	GO:1990617~CHOP-ATF4 complex	2	0.625	0.0277198	DDIT3, ATF4	297	2	21208	71.4074	0.999939	0.367821	0.35716
GOTERM_CC_DIRECT	GO:1990622~CHOP-ATF3 complex	2	0.625	0.0277198	DDIT3, ATF3	297	2	21208	71.4074	0.999939	0.367821	0.35716
GOTERM_CC_DIRECT	GO:1990184~amino acid transport complex	2	0.625	0.0277198	SLC7A5, SLC3A2	297	2	21208	71.4074	0.999939	0.367821	0.35716
GOTERM_CC_DIRECT	GO:0005730~nucleolus	21	6.5625	0.0366391	ZFP622, MIDN, NOP58, CDKN1A, RPL3, NIFK, AEN, KLF6, RGS2, RGCC, CCND2, ZMAT3, MYC, ENC1, FGF18, WDFY1, TSR1, RRP12, EEF1E1, PHLDA1, ATF3	297	928	21208	1.6159	0.999997	0.44062	0.427849
GOTERM_CC_DIRECT	GO:0044297~cell body	6	1.875	0.0389391	RNF157, ACTA1, CXADR, DPYSL3, GNB3, GLUL	297	133	21208	3.22139	0.999999	0.44062	0.427849
GOTERM_CC_DIRECT	GO:0032991~macromolecular complex	21	6.5625	0.0406749	CDKN1A, RPL3, CXADR, ZBTB16, NOG, IRS2, PRKCA, NR0B2, NPPB, NFKBIA, GCHFR, ACTA1, PRKAR1A, MYC, BCL2, ANKRD1, GLUL, SNTB1, CD44, ATF4, SNTA1	297	939	21208	1.59697	0.999999	0.44062	0.427849
GOTERM_CC_DIRECT	GO:0036488~CHOP-C/EBP complex	2	0.625	0.0412912	CEBPB, DDIT3	297	3	21208	47.6049	1	0.44062	0.427849
GOTERM_CC_DIRECT	GO:0045121~membrane raft	10	3.125	0.0416847	TUBA1C, KCNE1, ADGRG1, CXADR, FAS, KCNA5, PRKCA, SORBS1, SLC25A5, CD44	297	328	21208	2.17706	1	0.44062	0.427849
GOTERM_CC_DIRECT	GO:0043025~neuronal cell body	16	5	0.0421144	TGFB2, SLC38A1, PDE1C, SLC3A2, SLC1A4, PRKCA, BAIAP2, LRP8, SORL1, PTPRF, SLC8A1, ENC1, FAS, SLC38A2, DLGAP4, PICALM	297	654	21208	1.74697	1	0.44062	0.427849
GOTERM_CC_DIRECT	GO:0005886~plasma membrane	99	30.9375	0.0427098	ATP8A2, GPR68, IRS1, CPNE7, FAM107A, IRS2, CELSR1, ABRA, SLC8A1, RGS2, BAIAP2L1, SLC16A6, GLUL, MFSD4B1, CAR4, PHLDA3, SEMA6B, SLC38A1, CXADR, ARRDC2, GPR75, PRKCA, PRKAR1A, DPEP1, ROR1, FREM2, ATF4, KCNE1, PARM1, SLC1A4, ADGRG1, CDH20, ZMAT3, PDGFC, PACSIN2, THEM4, SLC38A2, NTSR2, SLC19A2, SLC10A6, ABCA5, ZBTB16, PCDH20, ADAP1, NFKBIA, EHD4, SLC6A9, AMOTL2, FGFR3, PICALM, CLIC5, TENM4, HIF3A, ED…	297	6027	21208	1.17294	1	0.44062	0.427849
GOTERM_CC_DIRECT	GO:0005856~cytoskeleton	29	9.0625	0.0434235	DCLRE1B, CLIC5, FAM107A, LDB3, MYOM2, ABRA, LMOD2, TUBA1C, CSRP3, BAIAP2L1, ENC1, PACSIN2, FLNC, SNTA1, SORBS1, BAIAP2, CKAP4, PTP4A1, ACTA1, TUBB2A, RGCC, SYNPO2L, HECW2, CDC42EP4, TTLL11, ATF5, SNTB1, ATF4, BCL2L1	297	1426	21208	1.45218	1	0.44062	0.427849
GOTERM_CC_DIRECT	GO:0031012~extracellular matrix	9	2.8125	0.0500364	MFAP5, COL28A1, ADAMTS15, TGFB2, LOX, ADAMTSL2, LAMC2, TIMP4, COLQ	297	289	21208	2.22376	1	0.493216	0.47892
GOTERM_CC_DIRECT	GO:0005622~intracellular	6	1.875	0.0516547	TUFT1, NMRK2, BCL2, SNTB1, BCL2L1, SNTA1	297	144	21208	2.97531	1	0.495024	0.480675
GOTERM_CC_DIRECT	GO:0032587~ruffle membrane	5	1.5625	0.0531131	SPRY4, FAM107A, PACSIN2, THEM4, NME1	297	101	21208	3.53502	1	0.495244	0.480889
GOTERM_CC_DIRECT	GO:0014704~intercalated disc	4	1.25	0.0557467	CXADR, KCNA5, PRKCA, SLC8A1	297	62	21208	4.60693	1	0.506121	0.491451
GOTERM_CC_DIRECT	GO:0031528~microvillus membrane	3	0.9375	0.0732261	SLC7A5, SLC7A8, DPEP1	297	32	21208	6.69444	1	0.638259	0.619758
GOTERM_CC_DIRECT	GO:0012505~endomembrane system	6	1.875	0.074001	PPP1R14C, LARS, MCF2L, CDC42EP4, PLD1, RNF122	297	160	21208	2.67778	1	0.638259	0.619758
GOTERM_CC_DIRECT	GO:0045202~synapse	21	6.5625	0.0778425	RPL3, FAM107A, SLC3A2, NRG1, MYRIP, SORBS1, EIF2S2, PLD1, COLQ, SLC8A1, ETV5, SLC4A8, SYT12, PRKAR1A, DPYSL3, RPS27A, SNTB1, DLGAP4, SNTA1, BCL2L1, PICALM	297	1016	21208	1.47594	1	0.638839	0.620322
GOTERM_CC_DIRECT	GO:0098591~external side of apical plasma membrane	2	0.625	0.080883	SLC7A5, SLC38A1	297	6	21208	23.8025	1	0.638839	0.620322
GOTERM_CC_DIRECT	GO:0031226~intrinsic component of plasma membrane	3	0.9375	0.0813522	S1PR1, TLR4, SLC8A1	297	34	21208	6.30065	1	0.638839	0.620322
GOTERM_CC_DIRECT	GO:0031965~nuclear membrane	8	2.5	0.0814751	GCHFR, NR4A1, CCND2, BCL2, AEN, RRP12, TMEM53, BCL2L1	297	268	21208	2.13156	1	0.638839	0.620322
GOTERM_CC_DIRECT	GO:0031966~mitochondrial membrane	6	1.875	0.0842256	RNF144B, RHBDD1, BCL2, PRKCA, ALDH18A1, BCL2L1	297	167	21208	2.56554	1	0.64573	0.627013
GOTERM_CC_DIRECT	GO:0005912~adherens junction	6	1.875	0.088574	CXADR, CDH20, CCDC85A, CDC42EP4, LDB3, SORBS1	297	170	21208	2.52026	1	0.664305	0.64505
GOTERM_CC_DIRECT	GO:0009925~basal plasma membrane	4	1.25	0.0956825	SLC7A5, SLC7A8, SLC6A9, SLC3A2	297	78	21208	3.66192	1	0.702351	0.681993

## Sheet: GO_CC_downregulated genes
Category	Term	Count	%	PValue	Genes	List Total	Pop Hits	Pop Total	Fold Enrichment	Bonferroni	Benjamini	FDR
GOTERM_CC_DIRECT	GO:0008076~voltage-gated potassium channel complex	7	2.88066	9.29803e-05	KCNH2, KCNV2, KCND2, KCNA7, LRRC55, KCNJ2, KCNJ3	214	73	21208	9.50301	0.0296777	0.0301256	0.0300326
GOTERM_CC_DIRECT	GO:0005833~hemoglobin complex	4	1.64609	0.000265226	HBA-A2, HBB-BT, HBA-A1, HBB-BS	214	13	21208	30.4932	0.082355	0.036187	0.0360753
GOTERM_CC_DIRECT	GO:0031838~haptoglobin-hemoglobin complex	4	1.64609	0.000335065	HBA-A2, HBB-BT, HBA-A1, HBB-BS	214	14	21208	28.3151	0.102892	0.036187	0.0360753
GOTERM_CC_DIRECT	GO:0030315~T-tubule	5	2.05761	0.00462696	FER1L5, KCND2, ADRA1B, KCNJ2, KCNJ3	214	67	21208	7.39573	0.777453	0.365997	0.364867
GOTERM_CC_DIRECT	GO:0005576~extracellular region	31	12.7572	0.00657586	LAMA5, IGHM, PTGFR, ITIH4, CTF1, CSF1, CPXM2, LAMC3, COL11A2, CFP, ART5, CPN2, PYCARD, EGFLAM, ENPP2, ARSI, IGFBP5, ANGPT1, RNLS, IL15, ENTPD5, CLEC11A, ADIPOQ, GKN3, NPNT, MMP9, GFRA4, PM20D1, COL6A6, FGF11, PF4	214	1860	21208	1.65171	0.882064	0.365997	0.364867
GOTERM_CC_DIRECT	GO:0005604~basement membrane	6	2.46914	0.00731401	ACTA2, LAMA5, EGFLAM, LAMC3, COL4A6, NPNT	214	120	21208	4.95514	0.907306	0.365997	0.364867
GOTERM_CC_DIRECT	GO:0009986~cell surface	17	6.99588	0.00827591	RTN4R, KCNH2, NGFR, SEMA6C, IGHM, IL15, ADIPOQ, LRRC32, PRLR, RGMA, ART1, ITGA8, PLXNB3, CD38, ITGA7, ITGB6, KCNJ3	214	814	21208	2.06971	0.932292	0.365997	0.364867
GOTERM_CC_DIRECT	GO:0031012~extracellular matrix	9	3.7037	0.00903695	LAMA5, EGFLAM, COL11A2, COL4A6, COL6A6, LRRC32, NPNT, MMP9, CPN2	214	289	21208	3.08625	0.947202	0.365997	0.364867
GOTERM_CC_DIRECT	GO:0001518~voltage-gated sodium channel complex	3	1.23457	0.0123641	SCN10A, SCN4A, SCN4B	214	17	21208	17.4887	0.982243	0.445109	0.443736
GOTERM_CC_DIRECT	GO:0043025~neuronal cell body	14	5.76132	0.0152812	RET, RTN4R, SLC22A3, KCND2, WHRN, DIXDC1, AKAP5, TUBB4A, CRHR2, PYCARD, P2RX6, PPP1R1B, CNGA3, KCNJ2	214	654	21208	2.12147	0.99319	0.476889	0.475417
GOTERM_CC_DIRECT	GO:0034707~chloride channel complex	4	1.64609	0.0161907	CLCNKB, SLC17A7, CLCN1, SLC26A6	214	53	21208	7.47946	0.994952	0.476889	0.475417
GOTERM_CC_DIRECT	GO:0016020~membrane	95	39.0947	0.0185231	RET, IGHM, CSF1, LAMC3, SLC40A1, MYRFL, PKD2L2, ADRA1B, LRRC32, ABCA12, EPRS, CELSR3, MRGPRH, CDH4, B3GALT2, MFSD3, PDE4A, CTLA4, CD38, CNGA3, ITGB6, GAL3ST3, KCNH2, SEMA6C, MREG, SLC6A17, KCND2, ENTPD5, ANO8, NPNT, PRLR, PDIA6, RGMA, GFRA4, SCN10A, ORAI3, COL4A6, ITGA8, APLNR, ITGA7, KXD1, SCN4A, PRKCQ, TCTA, LCP1, CYP2E1, SCN4B, SLC29A2, RTN4R, PTGFR, SLC22A3, MAOB, PLPPR2, MGST1, CLCNKB, WNK4,…	214	7842	21208	1.20056	0.99766	0.500125	0.498581
GOTERM_CC_DIRECT	GO:0043197~dendritic spine	7	2.88066	0.020867	NGFR, P2RX6, KCND2, AKAP5, PDLIM4, KCNJ2, LZTS3	214	213	21208	3.2569	0.998922	0.52007	0.518465
GOTERM_CC_DIRECT	GO:0043204~perikaryon	7	2.88066	0.02543	RTN4R, NGFR, OPN4, KCND2, ITGA8, CNGA3, CRHR2	214	223	21208	3.11085	0.999763	0.588524	0.586708
GOTERM_CC_DIRECT	GO:0005615~extracellular space	30	12.3457	0.0322032	LAMA5, IGHM, ITIH4, CTF1, CSF1, COL11A2, HBA-A2, HBA-A1, CFP, LRRC32, CPN2, ENPP2, SEMA6C, IGFBP5, ANGPT1, RNLS, IL15, ENTPD5, CLEC11A, ADIPOQ, GKN3, HBB-BT, HBB-BS, PDIA6, MMP9, GFRA4, PM20D1, IGHG2C, COL4A6, PF4	214	2023	21208	1.46964	0.999975	0.653814	0.651796
GOTERM_CC_DIRECT	GO:0098978~glutamatergic synapse	13	5.34979	0.0340943	RTN4R, LAMA5, SLC6A17, KCND2, AKAP5, CORO1A, P2RX6, SCN10A, EFNB3, PPP1R1B, ITGA8, KCNJ2, LZTS3	214	657	21208	1.96094	0.999987	0.653814	0.651796
GOTERM_CC_DIRECT	GO:0005886~plasma membrane	74	30.4527	0.0355235	RET, IGHM, CSF1, HDAC11, SLC40A1, ADRA1B, LRRC32, ABCA12, EPRS, CELSR3, MRGPRH, CDH4, ENPP2, TBC1D10C, PDE4A, CTLA4, CD38, CNGA3, KCNH2, SEMA6C, MREG, SLC6A17, KCND2, ANO8, PDIA6, RGMA, GFRA4, SLC9A2, SCN10A, ORAI3, ITGA8, APLNR, SCN4A, PRKCQ, LCP1, CEP63, SCN4B, SLC29A2, RTN4R, PTGFR, SLC22A3, ITIH4, CLCNKB, DAPP1, ARHGAP18, AKAP5, CFP, CORO1A, LRRC55, CLCN1, CRHR2, SPTA1, CACNG6, KCNV2, EFNB3, …	214	6027	21208	1.21679	0.999992	0.653814	0.651796
GOTERM_CC_DIRECT	GO:0008305~integrin complex	3	1.23457	0.036323	ITGA8, ITGA7, ITGB6	214	30	21208	9.91028	0.999994	0.653814	0.651796
GOTERM_CC_DIRECT	GO:0030485~smooth muscle contractile fiber	2	0.823045	0.0492228	ACTA2, NPNT	214	5	21208	39.6411	1	0.816177	0.813658
GOTERM_CC_DIRECT	GO:0015629~actin cytoskeleton	7	2.88066	0.0509567	ACTA2, CNN1, ABLIM2, LCP1, CORO1A, PDLIM4, PKNOX2	214	264	21208	2.62773	1	0.816177	0.813658
GOTERM_CC_DIRECT	GO:0042383~sarcolemma	5	2.05761	0.0529004	KCND2, ALOX5, ITGA7, PRKCQ, CLCN1	214	140	21208	3.53939	1	0.816177	0.813658
GOTERM_CC_DIRECT	GO:0005737~cytoplasm	88	36.214	0.0596693	TOP2A, IGHM, NAA40, CITED4, HDAC11, DIXDC1, YBX2, MEOX2, ADRA1B, HNMT, ABCA12, EPRS, NUDT6, NUDT4, PYCARD, KBTBD13, AS3MT, DUSP10, ENPP2, DACT3, PDE4A, AOX1, CNGA3, SOX7, HTATIP2, PKNOX2, LZTS3, SEMA6C, RBFOX1, DNAAF3, IL15, TMOD4, CLEC11A, JOSD2, KLHL40, ACTA2, RP1, TBC1D4, IFT81, MAP7D1, PSME4, ITGA7, PRKCQ, LCP1, CYP2E1, CEP63, KIZ, PTGFR, ITIH4, CCDC69, WNK4, DAPP1, ARHGAP18, FOXO6, NREP, AKA…	214	7529	21208	1.15833	1	0.878766	0.876054
GOTERM_CC_DIRECT	GO:0005887~integral component of plasma membrane	20	8.23045	0.0625331	RET, RTN4R, KCNH2, SLC22A3, SEMA6C, OPN4, PLPPR2, SLC6A17, KCND2, CLCNKB, ADRA1B, CLCN1, P2RX6, CDH4, ENPP2, PLXNB3, CTLA4, SCN4A, SLC26A6, SLC29A2	214	1294	21208	1.53173	1	0.880901	0.878182
GOTERM_CC_DIRECT	GO:0005884~actin filament	4	1.64609	0.0853681	WHRN, LCP1, CORO1A, GCK	214	103	21208	3.84865	1	1	1
GOTERM_CC_DIRECT	GO:0030016~myofibril	3	1.23457	0.08991	KBTBD13, ABLIM2, TMOD4	214	50	21208	5.94617	1	1	1

## Sheet: GO_MF_upregulated genes
Category	Term	Count	%	PValue	Genes	List Total	Pop Hits	Pop Total	Fold Enrichment	Bonferroni	Benjamini	FDR
GOTERM_MF_DIRECT	GO:0015175~neutral amino acid transmembrane transporter activity	6	1.875	1.38616e-05	SLC7A5, SLC7A8, SLC43A2, SLC3A2, SLC1A4, SLC38A2	289	21	18714	18.5012	0.0085162	0.00855261	0.00845558
GOTERM_MF_DIRECT	GO:0004812~aminoacyl-tRNA ligase activity	7	2.1875	4.15209e-05	CARS, YARS, LARS, SARS, GARS, IARS, AARS	289	42	18714	10.7924	0.0252936	0.0128092	0.0126639
GOTERM_MF_DIRECT	GO:0015190~L-leucine transmembrane transporter activity	4	1.25	0.000120598	SLC7A5, SLC7A8, SLC43A2, SLC3A2	289	7	18714	37.0025	0.0717123	0.024803	0.0245216
GOTERM_MF_DIRECT	GO:0005515~protein binding	113	35.3125	0.000165567	DCLRE1B, IRS1, FAM107A, IRS2, JADE2, CELSR1, SLC8A1, BACH2, NPPB, RGS2, ZFP36, CCND2, MYC, SESN2, DPYSL3, MAP3K6, GLUL, PHLDA1, CAR4, CXADR, HPCAL1, PRKCA, TICAM1, SFRP2, LOX, PRKAR1A, DDIT3, WDFY1, TRIB3, ATF5, FREM2, ATF4, FKBP5, NDRG4, AGAP2, PLD1, NPAS2, PACSIN2, TGFB2, ZBTB16, RHBDD1, DCLK3, EIF2S2, BMP7, NR0B2, GADD45G, NFKBIA, NR4A1, RCAN1, UCK2, EHD4, RGCC, BCL2, AMOTL2, MNAT1, FGFR3, BCL…	289	5418	18714	1.35054	0.0971181	0.0255388	0.025249
GOTERM_MF_DIRECT	GO:0016874~ligase activity	10	3.125	0.000305942	CARS, YARS, LARS, SARS, ASNS, GARS, TTLL11, IARS, GLUL, AARS	289	139	18714	4.65858	0.172044	0.0377532	0.0373249
GOTERM_MF_DIRECT	GO:0003779~actin binding	17	5.3125	0.00042508	FAM107A, LDB3, MYRIP, ABRA, LMOD2, CSRP3, BAIAP2L1, SYNPO2L, CLMN, ENC1, NRAP, XIRP2, FLNC, MYOZ2, SNTB1, SNTA1, MYH7	289	394	18714	2.79397	0.230743	0.0428807	0.0423943
GOTERM_MF_DIRECT	GO:0003700~transcription factor activity, sequence-specific DNA binding	23	7.1875	0.000486491	CSRNP1, CEBPB, ZFP697, CEBPD, ZBTB16, HIF3A, TFCP2L1, POU3F1, KLF4, KLF15, BACH2, KLF2, ETV5, NPAS2, NR4A1, KLF6, NR4A3, MYC, DDIT3, MAFF, ATF5, ATF3, ATF4	289	650	18714	2.29131	0.259358	0.0428807	0.0423943
GOTERM_MF_DIRECT	GO:0042802~identical protein binding	50	15.625	0.000954318	CARS, TENM4, RASEF, ABAT, CSRP3, DPYSL3, UPP1, GLUL, CXADR, NME1, ANGPTL7, DDIT3, GARS, TLR4, ATF3, ATF4, MYH7, CEBPB, CEBPD, BRI3, CEBPG, STC1, NT5C2, SULT1A1, NT5E, PACSIN2, FLNC, TBL1X, XDH, NTSR2, TGFB2, ZBTB16, PYCR1, ASNS, BAIAP2, GADD45G, NFKBIA, NR4A1, SLC4A8, RCAN1, UCK2, PSAT1, BCL2, FAS, AMOTL2, ALDH18A1, FGFR3, PFKP, BCL2L1, PICALM	289	2030	18714	1.59493	0.445171	0.0736018	0.0727668
GOTERM_MF_DIRECT	GO:0015179~L-amino acid transmembrane transporter activity	5	1.5625	0.00124573	SLC7A5, SLC38A1, SLC7A8, SLC43A2, SLC1A4	289	31	18714	10.4442	0.536566	0.0854015	0.0844326
GOTERM_MF_DIRECT	GO:0015293~symporter activity	8	2.5	0.00323777	SLC10A6, SLC38A1, SLC45A3, SLC6A9, SLC16A6, SLC1A4, SLC38A2, MFSD4B1	289	125	18714	4.14428	0.864792	0.195844	0.193622
GOTERM_MF_DIRECT	GO:0000976~transcription regulatory region sequence-specific DNA binding	12	3.75	0.00349154	PER1, CEBPB, CEBPD, DDIT3, ARID5B, TBL1X, KLF4, ATF5, KLF15, ATF3, ETV5, ATF4	289	273	18714	2.84634	0.88445	0.195844	0.193622
GOTERM_MF_DIRECT	GO:0031433~telethonin binding	3	0.9375	0.00470977	CSRP3, KCNE1, MYOZ2	289	7	18714	27.7519	0.945676	0.218146	0.215671
GOTERM_MF_DIRECT	GO:0001228~transcriptional activator activity, RNA polymerase II transcription regulatory region sequence-specific binding	18	5.625	0.0047879	CSRNP1, CEBPB, CEBPD, IRX3, CEBPG, TFCP2L1, KLF4, KLF15, ETV5, NR4A1, KLF6, NR4A3, MYC, DDIT3, MAFF, ATF5, ATF3, ATF4	289	545	18714	2.13867	0.948245	0.218146	0.215671
GOTERM_MF_DIRECT	GO:0000049~tRNA binding	6	1.875	0.00534043	CARS, YARS, XPOT, SARS, IARS, AARS	289	73	18714	5.32227	0.963259	0.218146	0.215671
GOTERM_MF_DIRECT	GO:0044877~macromolecular complex binding	21	6.5625	0.00537555	DCLRE1B, TGFB2, KCNE1, CDKN1A, IRS1, CEBPG, NOG, AGAP2, NR0B2, PTPRF, NFKBIA, GCHFR, ZFP36, MYC, SESN2, BCL2, FAS, PFKP, NTSR2, MYH7, BCL2L1	289	692	18714	1.96509	0.964051	0.218146	0.215671
GOTERM_MF_DIRECT	GO:1990837~sequence-specific double-stranded DNA binding	18	5.625	0.00592224	CEBPB, CEBPD, IRX5, IRX3, CEBPG, TFCP2L1, POU3F1, KLF4, KLF15, BACH2, KLF2, ETV5, NPAS2, NR4A1, KLF6, MAFF, ATF3, ATF4	289	557	18714	2.0926	0.974393	0.218146	0.215671
GOTERM_MF_DIRECT	GO:0005283~sodium:amino acid symporter activity	3	0.9375	0.00621611	SLC38A1, SLC6A9, SLC38A2	289	8	18714	24.2829	0.978663	0.218146	0.215671
GOTERM_MF_DIRECT	GO:0003824~catalytic activity	14	4.375	0.00636405	ODC1, SLC3A2, ABAT, PLD1, NT5C2, YDJC, ALDH1L2, AZIN1, MTHFD2, PSAT1, ALDH18A1, UPP1, GLUL, PFKP	289	381	18714	2.37942	0.980536	0.218146	0.215671
GOTERM_MF_DIRECT	GO:0008201~heparin binding	9	2.8125	0.0068545	COL28A1, ADAMTS15, ADGRG1, LRTM2, LAMC2, BMP7, PTPRF, COLQ, LGR4	289	180	18714	3.23772	0.985647	0.222591	0.220066
GOTERM_MF_DIRECT	GO:0005158~insulin receptor binding	4	1.25	0.00889055	IRS1, IRS2, SORBS1, PTPRF	289	28	18714	9.25062	0.995954	0.272207	0.269119
GOTERM_MF_DIRECT	GO:0000166~nucleotide binding	40	12.5	0.00926476	CARS, ATP8A2, GCNT1, RASEF, AGAP2, AGAP1, NT5C2, SULT1A1, TUBA1C, NT5E, RASD1, LARS, NMRK2, MAP3K6, GLUL, MAPK4, YARS, ABCA5, DCLK3, SARS, ASNS, PRKCA, NME1, ACTA1, UCK2, TUBB2A, EHD4, PRKAR1A, RRAGD, ROR1, GARS, TTLL11, ALDH18A1, ATP13A3, IARS, SGK1, FGFR3, PFKP, AARS, MYH7	289	1721	18714	1.50504	0.996795	0.272207	0.269119
GOTERM_MF_DIRECT	GO:0015180~L-alanine transmembrane transporter activity	3	0.9375	0.00978926	SLC7A8, SLC3A2, SLC1A4	289	10	18714	19.4263	0.997688	0.274544	0.27143
GOTERM_MF_DIRECT	GO:0015171~amino acid transmembrane transporter activity	4	1.25	0.0139966	SLC7A5, SLC38A1, SLC7A8, SLC38A2	289	33	18714	7.84901	0.999833	0.36755	0.36338
GOTERM_MF_DIRECT	GO:0022857~transmembrane transporter activity	9	2.8125	0.0142969	SLC4A8, SLC7A5, SLC37A1, SLC45A3, SLC7A8, SLC43A2, SLC43A3, SLC16A6, MFSD4B1	289	205	18714	2.84287	0.999862	0.36755	0.36338
GOTERM_MF_DIRECT	GO:0002161~aminoacyl-tRNA editing activity	3	0.9375	0.0164604	LARS, IARS, AARS	289	13	18714	14.9433	0.999964	0.406242	0.401633
GOTERM_MF_DIRECT	GO:0005545~1-phosphatidylinositol binding	3	0.9375	0.0190108	MCF2L, WDFY1, PICALM	289	14	18714	13.8759	0.999993	0.451141	0.446023
GOTERM_MF_DIRECT	GO:0019901~protein kinase binding	17	5.3125	0.0217681	CDKN1A, IRS1, AGAP2, IRS2, KCNA5, SORBS1, TICAM1, NME1, ZFP36, RGCC, NR4A3, CCND2, TRIB3, CD44, MAPK4, ATF4, BCL2L1	289	593	18714	1.85636	0.999999	0.490579	0.485013
GOTERM_MF_DIRECT	GO:0043565~sequence-specific DNA binding	15	4.6875	0.0222629	CSRNP1, CEBPB, CEBPD, CEBPG, POU3F1, KLF4, ETV5, NR4A1, NR4A3, MYC, DDIT3, MAFF, BCL2, ATF5, ATF4	289	497	18714	1.95436	0.999999	0.490579	0.485013
GOTERM_MF_DIRECT	GO:0050484~GMP 5'-nucleotidase activity	2	0.625	0.0305431	NT5E, NT5C2	289	2	18714	64.7543	1	0.64983	0.642458
GOTERM_MF_DIRECT	GO:0046872~metal ion binding	70	21.875	0.0339724	CARS, CDKN1A, ATP8A2, CPNE7, ABAT, LDB3, JADE2, SLC8A1, RNF157, TUBA1C, ZFP36, CSRP3, NMRK2, PHYHD1, CYP1B1, NUDT17, MAP3K6, GLUL, TIMP4, AGFG2, CAR4, ZFP697, GLCE, HPCAL1, PRKCA, MYRIP, KLF15, YDJC, NME1, RNF144B, TUBB2A, LOX, RUFY4, WDFY1, DPEP1, TTLL11, RNF122, FREM2, ZFP622, ZFP422, PDE1C, AGAP2, AGAP1, TIMM10, NT5C2, LRP8, NPAS2, ADAMTS15, NT5E, ZMAT3, CDH20, NRAP, XIRP2, RPS27A, XDH, IRF2BP…	289	3646	18714	1.24323	1	0.685972	0.678189
GOTERM_MF_DIRECT	GO:0015297~antiporter activity	5	1.5625	0.0349519	SLC4A8, SLC7A5, SLC37A1, SLC25A5, SLC8A1	289	80	18714	4.04715	1	0.685972	0.678189
GOTERM_MF_DIRECT	GO:0051020~GTPase binding	4	1.25	0.0355771	RRAGD, GNB3, IARS, BCL2L1	289	47	18714	5.51101	1	0.685972	0.678189
GOTERM_MF_DIRECT	GO:0042803~protein homodimerization activity	21	6.5625	0.0371164	CARS, DCLRE1B, CEBPB, TGFB2, TENM4, GDF15, GLCE, ZBTB16, NOG, ODC1, SARS, TIMM10, NR0B2, NR4A3, DDIT3, PDGFC, BCL2, XDH, ATF3, MAPK4, BCL2L1	289	845	18714	1.60928	1	0.693964	0.686091
GOTERM_MF_DIRECT	GO:0061629~RNA polymerase II sequence-specific DNA binding transcription factor binding	8	2.5	0.0388585	CEBPB, CSRP3, DDIT3, TCF23, IFRD1, ANKRD1, KLF4, ATF4	289	204	18714	2.53939	1	0.705168	0.697168
GOTERM_MF_DIRECT	GO:0035259~glucocorticoid receptor binding	3	0.9375	0.0408919	NR4A1, CEBPB, NR4A3	289	21	18714	9.25062	1	0.720867	0.712688
GOTERM_MF_DIRECT	GO:0015655~alanine:sodium symporter activity	2	0.625	0.0454642	SLC38A1, SLC38A2	289	3	18714	43.1696	1	0.738194	0.72982
GOTERM_MF_DIRECT	GO:0004586~ornithine decarboxylase activity	2	0.625	0.0454642	ODC1, AZIN1	289	3	18714	43.1696	1	0.738194	0.72982
GOTERM_MF_DIRECT	GO:0015375~glycine:sodium symporter activity	2	0.625	0.0454642	SLC38A1, SLC6A9	289	3	18714	43.1696	1	0.738194	0.72982
GOTERM_MF_DIRECT	GO:0019900~kinase binding	6	1.875	0.0493298	PER1, CEBPB, MIDN, FAS, ATF5, MYOM2	289	129	18714	3.01183	1	0.780422	0.771568
GOTERM_MF_DIRECT	GO:0050483~IMP 5'-nucleotidase activity	2	0.625	0.0601564	NT5E, NT5C2	289	4	18714	32.3772	1	0.883726	0.8737
GOTERM_MF_DIRECT	GO:0015173~aromatic amino acid transmembrane transporter activity	2	0.625	0.0601564	SLC7A5, SLC3A2	289	4	18714	32.3772	1	0.883726	0.8737
GOTERM_MF_DIRECT	GO:0008800~beta-lactamase activity	2	0.625	0.0601564	DCLRE1B, DPEP1	289	4	18714	32.3772	1	0.883726	0.8737
GOTERM_MF_DIRECT	GO:0008081~phosphoric diester hydrolase activity	4	1.25	0.0650446	PDE1C, PDE3A, PLCD3, PLCXD2	289	60	18714	4.31696	1	0.919616	0.909182
GOTERM_MF_DIRECT	GO:0000978~RNA polymerase II core promoter proximal region sequence-specific DNA binding	26	8.125	0.0655804	CEBPB, ZFP422, CEBPD, CEBPG, TFCP2L1, HIF3A, NPAS2, BACH2, MYC, ZFP697, IRX5, IRX3, ZBTB16, SARS, KLF4, POU3F1, KLF15, KLF2, PER1, NR4A1, KLF6, NR4A3, DDIT3, MAFF, ATF3, ATF4	289	1180	18714	1.42679	1	0.919616	0.909182
GOTERM_MF_DIRECT	GO:0030159~receptor signaling complex scaffold activity	3	0.9375	0.068652	IRS1, GNB3, SORBS1	289	28	18714	6.93796	1	0.920832	0.910385
GOTERM_MF_DIRECT	GO:0043548~phosphatidylinositol 3-kinase binding	3	0.9375	0.068652	IRS1, IRS2, TLR4	289	28	18714	6.93796	1	0.920832	0.910385
GOTERM_MF_DIRECT	GO:0005295~neutral amino acid:sodium symporter activity	2	0.625	0.0746233	SLC38A1, SLC38A2	289	5	18714	25.9017	1	0.979629	0.968515
GOTERM_MF_DIRECT	GO:0046982~protein heterodimerization activity	11	3.4375	0.0810566	NR4A1, CEBPB, TENM4, DDIT3, RRAGD, BCL2, TLR4, ATF3, MAPK4, BCL2L1, ATF4	289	391	18714	1.82173	1	1	0.99026
GOTERM_MF_DIRECT	GO:0031625~ubiquitin protein ligase binding	10	3.125	0.0812911	NFKBIA, PER1, CDKN1A, PRKAR1A, MYC, BCL2, TRIB3, SORBS1, RPS27A, SLC25A5	289	340	18714	1.90454	1	1	0.99026
GOTERM_MF_DIRECT	GO:0008083~growth factor activity	6	1.875	0.0841995	TGFB2, GDF15, PDGFC, FGF18, NRG1, BMP7	289	151	18714	2.57302	1	1	0.99026
GOTERM_MF_DIRECT	GO:0003714~transcription corepressor activity	7	2.1875	0.0870402	ANKRD1, IRF2BP2, TRIB3, TBL1X, TOB2, NR0B2, TOB1	289	199	18714	2.27779	1	1	0.99026
GOTERM_MF_DIRECT	GO:0015194~L-serine transmembrane transporter activity	2	0.625	0.0888682	SLC1A4, SLC38A2	289	6	18714	21.5848	1	1	0.99026
GOTERM_MF_DIRECT	GO:0005298~proline:sodium symporter activity	2	0.625	0.0888682	SLC38A1, SLC38A2	289	6	18714	21.5848	1	1	0.99026
GOTERM_MF_DIRECT	GO:0035014~phosphatidylinositol 3-kinase regulator activity	2	0.625	0.0888682	AGAP2, KLF4	289	6	18714	21.5848	1	1	0.99026
GOTERM_MF_DIRECT	GO:0004860~protein kinase inhibitor activity	3	0.9375	0.0960326	CDKN1A, SPRY4, TRIB3	289	34	18714	5.71362	1	1	0.99026

## Sheet: GO_MF_downregulated genes
Category	Term	Count	%	PValue	Genes	List Total	Pop Hits	Pop Total	Fold Enrichment	Bonferroni	Benjamini	FDR
GOTERM_MF_DIRECT	GO:0005244~voltage-gated ion channel activity	12	4.93827	3.30737e-07	CACNG6, KCNH2, KCNV2, SCN10A, KCND2, CLCNKB, SCN4A, KCNA7, SCN4B, CLCN1, KCNJ2, KCNJ3	203	139	18714	7.95861	0.000164693	0.000164707	0.000163715
GOTERM_MF_DIRECT	GO:0031720~haptoglobin binding	4	1.64609	0.000327198	HBA-A2, HBB-BT, HBA-A1, HBB-BS	203	13	18714	28.3653	0.150384	0.0814723	0.0809815
GOTERM_MF_DIRECT	GO:0005344~oxygen transporter activity	4	1.64609	0.000625541	HBA-A2, HBB-BT, HBA-A1, HBB-BS	203	16	18714	23.0468	0.267738	0.10384	0.103214
GOTERM_MF_DIRECT	GO:0005254~chloride channel activity	6	2.46914	0.00164602	ANO8, CLCNKB, ANO10, SLC17A7, CLCN1, SLC26A6	203	79	18714	7.00156	0.559742	0.20493	0.203695
GOTERM_MF_DIRECT	GO:0005216~ion channel activity	8	3.29218	0.00251784	KCNH2, P2RX6, KCNV2, SCN10A, KCND2, SCN4A, CNGA3, KCNA7	203	170	18714	4.33822	0.715056	0.222662	0.22132
GOTERM_MF_DIRECT	GO:0019825~oxygen binding	4	1.64609	0.00268267	HBA-A2, HBB-BT, HBA-A1, HBB-BS	203	26	18714	14.1826	0.737568	0.222662	0.22132
GOTERM_MF_DIRECT	GO:0005249~voltage-gated potassium channel activity	5	2.05761	0.00505273	KCNH2, KCNV2, KCND2, KCNA7, LRRC55	203	64	18714	7.20212	0.919752	0.359466	0.3573
GOTERM_MF_DIRECT	GO:0043177~organic acid binding	3	1.23457	0.00836214	HBB-BT, HBA-A1, HBB-BS	203	13	18714	21.274	0.98473	0.520543	0.517407
GOTERM_MF_DIRECT	GO:0004601~peroxidase activity	4	1.64609	0.00977192	HBA-A2, HBB-BT, HBA-A1, HBB-BS	203	41	18714	8.99387	0.992481	0.540713	0.537456
GOTERM_MF_DIRECT	GO:0005326~neurotransmitter transporter activity	3	1.23457	0.0141734	SLC22A3, SLC17A7, SLC29A2	203	17	18714	16.2683	0.999182	0.666091	0.662078
GOTERM_MF_DIRECT	GO:0051015~actin filament binding	8	3.29218	0.0147129	SPTA1, KBTBD13, CNN1, ABLIM2, TMOD4, LCP1, CORO1A, PKNOX2	203	237	18714	3.1118	0.999377	0.666091	0.662078
GOTERM_MF_DIRECT	GO:0005242~inward rectifier potassium channel activity	3	1.23457	0.0252759	KCNH2, KCNJ2, KCNJ3	203	23	18714	12.0244	0.999997	0.943061	0.93738
GOTERM_MF_DIRECT	GO:0005178~integrin binding	6	2.46914	0.0259761	LAMA5, ITGA8, ITGA7, ITGB6, LCP1, NPNT	203	154	18714	3.59171	0.999998	0.943061	0.93738
GOTERM_MF_DIRECT	GO:0005248~voltage-gated sodium channel activity	3	1.23457	0.0273808	SCN10A, SCN4A, SCN4B	203	24	18714	11.5234	0.999999	0.943061	0.93738
GOTERM_MF_DIRECT	GO:0005509~calcium ion binding	15	6.17284	0.0284054	RET, CALR3, SYT3, FER1L5, PKD2L2, NPNT, TUBB4A, CELSR3, PDP1, SPTA1, CDH4, EGFLAM, HRC, ENPP2, LCP1	203	734	18714	1.88393	0.999999	0.943061	0.93738
GOTERM_MF_DIRECT	GO:0097621~monoamine oxidase activity	2	0.823045	0.0320356	MAOB, RNLS	203	3	18714	61.4581	1	0.997108	0.991101
GOTERM_MF_DIRECT	GO:0044877~macromolecular complex binding	14	5.76132	0.0376877	RTN4R, KCNH2, NGFR, KCND2, HBB-BT, AKAP5, HBB-BS, HBA-A1, MMP9, PDP1, P2RX6, NACC2, ITGA7, CNGA3	203	692	18714	1.86506	1	1	0.995976
GOTERM_MF_DIRECT	GO:0008022~protein C-terminus binding	7	2.88066	0.0420768	TOP2A, CENPF, RBFOX1, MID1IP1, YEATS4, CNGA3, CORO1A	203	234	18714	2.75774	1	1	0.995976
GOTERM_MF_DIRECT	GO:0005201~extracellular matrix structural constituent	5	2.05761	0.0433085	LAMA5, ADIPOQ, COL11A2, COL4A6, NPNT	203	122	18714	3.77816	1	1	0.995976
GOTERM_MF_DIRECT	GO:0005272~sodium channel activity	3	1.23457	0.0465296	SCN10A, SCN4A, SCN4B	203	32	18714	8.64255	1	1	0.995976
GOTERM_MF_DIRECT	GO:0031722~hemoglobin beta binding	2	0.823045	0.0528232	HBB-BT, HBB-BS	203	5	18714	36.8749	1	1	0.995976
GOTERM_MF_DIRECT	GO:0004741~[pyruvate dehydrogenase (lipoamide)] phosphatase activity	2	0.823045	0.0528232	PDP1, PDP2	203	5	18714	36.8749	1	1	0.995976
GOTERM_MF_DIRECT	GO:0020037~heme binding	6	2.46914	0.0535703	CYP26A1, HBA-A2, HBB-BT, HBA-A1, CYP2E1, HBB-BS	203	188	18714	2.94214	1	1	0.995976
GOTERM_MF_DIRECT	GO:0003824~catalytic activity	9	3.7037	0.0551793	PFKFB1, ARSI, APEX2, ACSM5, GALM, OPLAH, EPRS, GCK, FDFT1	203	381	18714	2.17765	1	1	0.995976
GOTERM_MF_DIRECT	GO:0005267~potassium channel activity	4	1.64609	0.05905	KCNH2, KCNV2, KCND2, KCNA7	203	82	18714	4.49694	1	1	0.995976
GOTERM_MF_DIRECT	GO:0005506~iron ion binding	6	2.46914	0.0618418	CYP26A1, ALOX5, AOX1, HBA-A2, HBA-A1, CYP2E1	203	196	18714	2.82206	1	1	0.995976
GOTERM_MF_DIRECT	GO:0086006~voltage-gated sodium channel activity involved in cardiac muscle cell action potential	2	0.823045	0.0630498	SCN10A, SCN4B	203	6	18714	30.7291	1	1	0.995976
GOTERM_MF_DIRECT	GO:0003779~actin binding	9	3.7037	0.0645467	SPTA1, CNN1, ABLIM2, TMOD4, DIXDC1, AKAP5, LCP1, CORO1A, PDLIM4	203	394	18714	2.1058	1	1	0.995976
GOTERM_MF_DIRECT	GO:0015026~coreceptor activity	3	1.23457	0.0722687	NGFR, RGMA, GFRA4	203	41	18714	6.7454	1	1	0.995976
GOTERM_MF_DIRECT	GO:0017046~peptide hormone binding	3	1.23457	0.0784929	SLC40A1, PRLR, CRHR2	203	43	18714	6.43166	1	1	0.995976
GOTERM_MF_DIRECT	GO:0031721~hemoglobin alpha binding	2	0.823045	0.0831746	HBB-BT, HBB-BS	203	8	18714	23.0468	1	1	0.995976
GOTERM_MF_DIRECT	GO:0019239~deaminase activity	2	0.823045	0.0831746	ADAL, RIDA	203	8	18714	23.0468	1	1	0.995976
GOTERM_MF_DIRECT	GO:0030020~extracellular matrix structural constituent conferring tensile strength	3	1.23457	0.084878	COL11A2, COL4A6, COL6A6	203	45	18714	6.14581	1	1	0.995976

## Sheet: KEGG_upregulated genes
Category	Term	Count	%	PValue	Genes	List Total	Pop Hits	Pop Total	Fold Enrichment	Bonferroni	Benjamini	FDR
KEGG_PATHWAY	mmu04115:p53 signaling pathway	10	3.125	2.82241e-06	CDKN1A, CCND2, ZMAT3, IGFBP3, PERP, SESN2, BCL2, FAS, BCL2L1, GADD45G	153	73	9212	8.24783	0.000736378	0.000736649	0.000697135
KEGG_PATHWAY	mmu04151:PI3K-Akt signaling pathway	18	5.625	8.44959e-05	CDKN1A, IRS1, LAMC2, PRKCA, NR4A1, CCND2, MYC, PDGFC, DDIT4, FGF18, BCL2, THEM4, GNB3, SGK1, FGFR3, TLR4, ATF4, BCL2L1	153	359	9212	3.01884	0.021813	0.0110267	0.0104352
KEGG_PATHWAY	mmu04068:FoxO signaling pathway	10	3.125	0.000305135	TGFB2, CDKN1A, CCND2, IRS1, AGAP2, S1PR1, IRS2, SGK1, KLF2, GADD45G	153	131	9212	4.59612	0.0765627	0.0265468	0.0251228
KEGG_PATHWAY	mmu00970:Aminoacyl-tRNA biosynthesis	7	2.1875	0.000734852	CARS, YARS, LARS, SARS, GARS, IARS, AARS	153	66	9212	6.38582	0.174583	0.0479491	0.0453771
KEGG_PATHWAY	mmu05202:Transcriptional misregulation in cancer	12	3.75	0.0011779	CEBPB, CDKN1A, SLC45A3, CCND2, NR4A3, IGFBP3, ZBTB16, MYC, DDIT3, ETV5, BCL2L1, GADD45G	153	224	9212	3.22549	0.2648	0.055071	0.052117
KEGG_PATHWAY	mmu04010:MAPK signaling pathway	14	4.375	0.00143663	DUSP4, TGFB2, PRKCA, GADD45G, NR4A1, MYC, DDIT3, PDGFC, FGF18, FAS, FLNC, MAP3K6, FGFR3, ATF4	153	302	9212	2.79115	0.312869	0.055071	0.052117
KEGG_PATHWAY	mmu05161:Hepatitis B	10	3.125	0.001477	NFKBIA, TGFB2, CDKN1A, MYC, BCL2, FAS, PRKCA, TICAM1, TLR4, ATF4	153	163	9212	3.69381	0.320081	0.055071	0.052117
KEGG_PATHWAY	mmu01230:Biosynthesis of amino acids	7	2.1875	0.00188663	PSAT1, PYCR1, ASNS, PHGDH, ALDH18A1, GLUL, PFKP	153	79	9212	5.33499	0.389132	0.0615513	0.0582497
KEGG_PATHWAY	mmu05222:Small cell lung cancer	7	2.1875	0.00428648	NFKBIA, CDKN1A, MYC, BCL2, LAMC2, BCL2L1, GADD45G	153	93	9212	4.53187	0.674103	0.112395	0.106366
KEGG_PATHWAY	mmu05206:MicroRNAs in cancer	13	4.0625	0.00430631	TGFB2, CDKN1A, SLC45A3, IRS1, IRS2, PRKCA, CCND2, MYC, DDIT4, BCL2, CYP1B1, FGFR3, CD44	153	303	9212	2.58323	0.675793	0.112395	0.106366
KEGG_PATHWAY	mmu04210:Apoptosis	8	2.5	0.00719311	NFKBIA, TUBA1C, DDIT3, BCL2, FAS, BCL2L1, ATF4, GADD45G	153	136	9212	3.54171	0.848047	0.154105	0.145839
KEGG_PATHWAY	mmu04064:NF-kappa B signaling pathway	7	2.1875	0.00770704	NFKBIA, BCL2, TICAM1, TLR4, EDA2R, BCL2L1, GADD45G	153	105	9212	4.01394	0.867255	0.154105	0.145839
KEGG_PATHWAY	mmu04022:cGMP-PKG signaling pathway	9	2.8125	0.00781218	NPPB, RGS2, IRS1, PDE3A, IRS2, SLC25A5, SLC8A1, ATF4, MYH7	153	173	9212	3.13227	0.870877	0.154105	0.145839
KEGG_PATHWAY	mmu05220:Chronic myeloid leukemia	6	1.875	0.00826618	NFKBIA, TGFB2, CDKN1A, MYC, BCL2L1, GADD45G	153	76	9212	4.75335	0.885415	0.154105	0.145839
KEGG_PATHWAY	mmu01521:EGFR tyrosine kinase inhibitor resistance	6	1.875	0.00969631	PDGFC, BCL2, NRG1, PRKCA, FGFR3, BCL2L1	153	79	9212	4.57285	0.921377	0.168716	0.159666
KEGG_PATHWAY	mmu01232:Nucleotide metabolism	6	1.875	0.0124434	UCK2, NT5E, UPP1, NT5C2, XDH, NME1	153	84	9212	4.30065	0.961921	0.202983	0.192095
KEGG_PATHWAY	mmu00240:Pyrimidine metabolism	5	1.5625	0.0134687	UCK2, NT5E, UPP1, NT5C2, NME1	153	56	9212	5.37582	0.970964	0.206783	0.195692
KEGG_PATHWAY	mmu04150:mTOR signaling pathway	8	2.5	0.0151079	SLC7A5, IRS1, SESN2, DDIT4, RRAGD, SLC3A2, PRKCA, SGK1	153	157	9212	3.06798	0.981188	0.215337	0.203786
KEGG_PATHWAY	mmu04727:GABAergic synapse	6	1.875	0.0156759	SLC38A1, GNB3, ABAT, PRKCA, SLC38A2, GLUL	153	89	9212	4.05904	0.983817	0.215337	0.203786
KEGG_PATHWAY	mmu05200:Pathways in cancer	17	5.3125	0.0170942	TGFB2, CDKN1A, ZBTB16, LAMC2, PRKCA, PLD1, GADD45G, NFKBIA, CCND2, GSTA3, MYC, FGF18, BCL2, GNB3, FAS, FGFR3, BCL2L1	153	543	9212	1.885	0.988893	0.22308	0.211114
KEGG_PATHWAY	mmu05215:Prostate cancer	6	1.875	0.0237241	NFKBIA, CDKN1A, PDGFC, BCL2, ETV5, ATF4	153	99	9212	3.64904	0.998101	0.294857	0.279041
KEGG_PATHWAY	mmu05417:Lipid and atherosclerosis	9	2.8125	0.0265039	NFKBIA, DDIT3, BCL2, FAS, PRKCA, TICAM1, TLR4, BCL2L1, ATF4	153	216	9212	2.50871	0.999098	0.314433	0.297567
KEGG_PATHWAY	mmu00760:Nicotinate and nicotinamide metabolism	4	1.25	0.029725	NT5E, NNT, NMRK2, NT5C2	153	41	9212	5.87406	0.99962	0.337314	0.319221
KEGG_PATHWAY	mmu05167:Kaposi sarcoma-associated herpesvirus infection	9	2.8125	0.0319532	NFKBIA, RCAN1, ZFP36, CDKN1A, MYC, FAS, GNB3, TICAM1, RPS27A	153	224	9212	2.41912	0.999792	0.347491	0.328852
KEGG_PATHWAY	mmu05145:Toxoplasmosis	6	1.875	0.0352193	NFKBIA, TGFB2, BCL2, LAMC2, TLR4, BCL2L1	153	110	9212	3.28414	0.999914	0.367556	0.34784
KEGG_PATHWAY	mmu05212:Pancreatic cancer	5	1.5625	0.0366148	TGFB2, CDKN1A, PLD1, BCL2L1, GADD45G	153	76	9212	3.96113	0.999941	0.367556	0.34784
KEGG_PATHWAY	mmu04724:Glutamatergic synapse	6	1.875	0.0401236	SLC38A1, GNB3, PRKCA, PLD1, SLC38A2, GLUL	153	114	9212	3.1689	0.999977	0.387862	0.367057
KEGG_PATHWAY	mmu01524:Platinum drug resistance	5	1.5625	0.0429447	CDKN1A, GSTA3, BCL2, FAS, BCL2L1	153	80	9212	3.76307	0.999989	0.400306	0.378834
KEGG_PATHWAY	mmu04919:Thyroid hormone signaling pathway	6	1.875	0.0482244	RCAN1, MYC, PRKCA, PLCD3, PFKP, MYH7	153	120	9212	3.01046	0.999998	0.434019	0.410739
KEGG_PATHWAY	mmu05205:Proteoglycans in cancer	8	2.5	0.0530182	TGFB2, CDKN1A, MYC, FAS, PRKCA, FLNC, TLR4, CD44	153	205	9212	2.34963	0.999999	0.461258	0.436517
KEGG_PATHWAY	mmu05166:Human T-cell leukemia virus 1 infection	9	2.8125	0.0548277	NFKBIA, TGFB2, ZFP36, CDKN1A, CCND2, MYC, SLC25A5, BCL2L1, ATF4	153	250	9212	2.16753	1	0.461614	0.436853
KEGG_PATHWAY	mmu05210:Colorectal cancer	5	1.5625	0.0573389	TGFB2, CDKN1A, MYC, BCL2, GADD45G	153	88	9212	3.42097	1	0.467671	0.442585
KEGG_PATHWAY	mmu04310:Wnt signaling pathway	7	2.1875	0.0650386	CCND2, SFRP2, MYC, ROR1, PRKCA, TBL1X, LGR4	153	172	9212	2.45037	1	0.501992	0.475066
KEGG_PATHWAY	mmu00983:Drug metabolism - other enzymes	5	1.5625	0.0653936	UCK2, GSTA3, UPP1, XDH, NME1	153	92	9212	3.27224	1	0.501992	0.475066
KEGG_PATHWAY	mmu05225:Hepatocellular carcinoma	7	2.1875	0.0679831	TGFB2, CDKN1A, GSTA3, MYC, PRKCA, BCL2L1, GADD45G	153	174	9212	2.42221	1	0.506959	0.479766
KEGG_PATHWAY	mmu00230:Purine metabolism	6	1.875	0.070637	NT5E, PDE1C, PDE3A, NT5C2, XDH, NME1	153	134	9212	2.69593	1	0.512118	0.484648
KEGG_PATHWAY	mmu05207:Chemical carcinogenesis - receptor activation	8	2.5	0.0787177	GSTA3, MYC, FGF18, BCL2, CYP1B1, PRKCA, KLF4, ATF4	153	225	9212	2.14077	1	0.555279	0.525494
KEGG_PATHWAY	mmu00062:Fatty acid elongation	3	0.9375	0.0822015	HACD1, ACOT2, THEM4	153	29	9212	6.22853	1	0.557875	0.527951
KEGG_PATHWAY	mmu04218:Cellular senescence	7	2.1875	0.0838542	TGFB2, CDKN1A, CCND2, IGFBP3, MYC, SLC25A5, GADD45G	153	184	9212	2.29057	1	0.557875	0.527951
KEGG_PATHWAY	mmu04140:Autophagy - animal	6	1.875	0.0856335	IRS1, DDIT4, RRAGD, BCL2, IRS2, BCL2L1	153	142	9212	2.54405	1	0.557875	0.527951
KEGG_PATHWAY	mmu05169:Epstein-Barr virus infection	8	2.5	0.0876355	NFKBIA, CDKN1A, CCND2, MYC, BCL2, FAS, CD44, GADD45G	153	231	9212	2.08517	1	0.557875	0.527951
KEGG_PATHWAY	mmu05142:Chagas disease	5	1.5625	0.0903893	NFKBIA, TGFB2, FAS, TICAM1, TLR4	153	103	9212	2.92277	1	0.561705	0.531575
KEGG_PATHWAY	mmu05162:Measles	6	1.875	0.0937138	NFKBIA, CCND2, BCL2, FAS, TLR4, BCL2L1	153	146	9212	2.47435	1	0.568821	0.53831

## Sheet: KEGG_downregulated genes
Category	Term	Count	%	PValue	Genes	List Total	Pop Hits	Pop Total	Fold Enrichment	Bonferroni	Benjamini	FDR
KEGG_PATHWAY	mmu04512:ECM-receptor interaction	8	3.29218	5.43573e-05	LAMA5, LAMC3, COL4A6, ITGA8, ITGA7, COL6A6, ITGB6, NPNT	103	89	9212	8.03927	0.0103288	0.0103823	0.0103823
KEGG_PATHWAY	mmu04151:PI3K-Akt signaling pathway	11	4.52675	0.00627475	NGFR, LAMA5, ANGPT1, CSF1, LAMC3, COL4A6, ITGA8, ITGA7, COL6A6, ITGB6, PRLR	103	359	9212	2.74041	0.699483	0.574494	0.574494
KEGG_PATHWAY	mmu05143:African trypanosomiasis	4	1.64609	0.00902347	HBA-A2, HBB-BT, HBA-A1, HBB-BS	103	39	9212	9.17301	0.822947	0.574494	0.574494
KEGG_PATHWAY	mmu04020:Calcium signaling pathway	8	3.29218	0.0219843	RET, PTGFR, P2RX6, PHKG1, ORAI3, HRC, CD38, ADRA1B	103	253	9212	2.82804	0.985676	0.79746	0.79746
KEGG_PATHWAY	mmu04510:Focal adhesion	7	2.88066	0.0249686	LAMA5, LAMC3, COL4A6, ITGA8, ITGA7, COL6A6, ITGB6	103	203	9212	3.08403	0.99201	0.79746	0.79746
KEGG_PATHWAY	mmu05144:Malaria	4	1.64609	0.0250511	HBA-A2, HBB-BT, HBA-A1, HBB-BS	103	57	9212	6.27627	0.992138	0.79746	0.79746
KEGG_PATHWAY	mmu00340:Histidine metabolism	3	1.23457	0.0332016	MAOB, CARNS1, HNMT	103	26	9212	10.3196	0.998418	0.905928	0.905928
KEGG_PATHWAY	mmu00982:Drug metabolism - cytochrome P450	4	1.64609	0.0438384	MAOB, MGST1, AOX1, CYP2E1	103	71	9212	5.0387	0.999809	1	1
KEGG_PATHWAY	mmu05412:Arrhythmogenic right ventricular cardiomyopathy	4	1.64609	0.053538	CACNG6, ITGA8, ITGA7, ITGB6	103	77	9212	4.64607	0.999973	1	1
KEGG_PATHWAY	mmu05323:Rheumatoid arthritis	4	1.64609	0.071774	ANGPT1, CSF1, IL15, CTLA4	103	87	9212	4.11204	0.999999	1	1
KEGG_PATHWAY	mmu05410:Hypertrophic cardiomyopathy	4	1.64609	0.079754	CACNG6, ITGA8, ITGA7, ITGB6	103	91	9212	3.93129	1	1	1
KEGG_PATHWAY	mmu05414:Dilated cardiomyopathy	4	1.64609	0.0859823	CACNG6, ITGA8, ITGA7, ITGB6	103	94	9212	3.80583	1	1	1
