# Supplementary material for: Cardiomyocyte-Specific Loss of Glutamyl-prolyl-tRNA Synthetase Leads to Disturbed Protein Homeostasis and Dilated Cardiomyopathy
Source: Cells. 2023 Dec 22;13(1):35. doi: 10.3390/cells13010035 (PMC10778562; doi:10.3390/cells13010035)
Supplement: Supplementary file 1 [file cells-13-00035-s001.zip › Supplementary Table 2.xlsx]

## Sheet: cKO vs Ctrl MS data
Protein Accession	Protein Description	Genes	# of Peptides	Log2 Fold Change (KO/WT)	P-Value	Median Log2 Abundance		Log2 Normalized Abundances
						KO	WT	KO-1	KO-2	KO-3	WT-1	WT-2	WT-3
Q61941	NAD(P) transhydrogenase, mitochondrial	Nnt	59	5.92475	2.18073e-06	26.2607	20.417	26.3443	26.2607	26.1814	20.417	20.0691	20.5261
Q9DBC7	cAMP-dependent protein kinase type I-alpha regulatory subunit	Prkar1a	18	0.6504	3.80917e-06	23.7695	23.1079	23.7182	23.7695	23.7695	23.1095	23.1079	23.0886
Q8BQM8	Echinoderm microtubule-associated protein-like 5	Eml5	1	-7.40204	3.8312e-06	15.272	22.7056	14.9482	15.272	15.6681	22.7056	22.7348	22.654
Q64338	Dual specificity Calcium/calmodulin-dependent 3',5'-cyclic nucleotide phosphodiesterase 1C	Pde1c	12	1.28842	1.35194e-05	20.7796	19.4913	20.7796	20.6714	20.8034	19.4933	19.4046	19.4913
Q8CGC7	Bifunctional glutamate/proline--tRNA ligase	Eprs1	44	-2.28972	1.79299e-05	19.7455	22.1143	19.6971	19.7455	20.002	22.1206	22.0789	22.1143
Q8R4S0	Protein phosphatase 1 regulatory subunit 14C	Ppp1r14c	3	0.680839	3.0635e-05	22.6409	21.9847	22.6164	22.6409	22.7182	21.9916	21.9847	21.9566
O54774	AP-3 complex subunit delta-1	Ap3d1	22	0.51689	3.11178e-05	20.3857	19.8576	20.3962	20.3645	20.3857	19.83	19.9083	19.8576
Q9WVE8	Protein kinase C and casein kinase substrate in neurons protein 2	Pacsin2	18	0.227624	4.50334e-05	23.2961	23.0756	23.2821	23.3101	23.2961	23.0756	23.0509	23.0789
Q5SSW2	Proteasome activator complex subunit 4	Psme4	15	-0.489493	5.0329e-05	20.1079	20.6096	20.0821	20.1079	20.1332	20.6276	20.5545	20.6096
Q91ZP3	Phosphatidate phosphatase LPIN1	Lpin1	5	-0.717862	6.80153e-05	19.1382	19.8936	19.1382	19.2137	19.1357	19.8936	19.9301	19.8175
Q8BU30	Isoleucine--tRNA ligase, cytoplasmic	Iars1	24	-1.57103	9.43603e-05	20.3962	21.9423	20.1703	20.3962	20.4676	21.9424	21.9742	21.8307
Q3TMH2	Secernin-3	Scrn3	11	-0.199009	0.00010305	20.8423	21.0559	20.8423	20.8423	20.8727	21.0359	21.0625	21.0559
Q80UU9	Membrane-associated progesterone receptor component 2	Pgrmc2	5	0.548429	0.000120537	21.3752	20.8423	21.3484	21.4476	21.3752	20.8423	20.8802	20.8034
Q8R3V5	Endophilin-B2	Sh3glb2	8	0.209801	0.000120537	20.6006	20.3962	20.5915	20.6006	20.6364	20.3962	20.4066	20.3962
P00493	Hypoxanthine-guanine phosphoribosyltransferase	Hprt1	7	0.527289	0.000122086	22.6164	22.0658	22.6364	22.6164	22.5545	22.0658	22.1238	22.0359
Q922B2	Aspartate--tRNA ligase, cytoplasmic	Dars1	23	-0.528248	0.000125772	23.48	23.9847	23.391	23.48	23.48	23.9847	24.0105	23.9406
P35700	Peroxiredoxin-1	Prdx1	14	-0.273411	0.000155305	25.9111	26.1852	25.9066	25.9111	25.9225	26.2207	26.1852	26.1546
P14602	Heat shock protein beta-1	Hspb1	16	0.425767	0.000156164	26.1507	25.7441	26.1507	26.217	26.141	25.7771	25.7441	25.7103
Q8BT60	Copine-3	Cpne3	5	0.219521	0.000168683	21.0886	20.8802	21.0886	21.0821	21.1206	20.895	20.8576	20.8802
Q9DBG1	Sterol 26-hydroxylase, mitochondrial	Cyp27a1	4	1.09364	0.000194353	18.9965	17.9545	18.9054	18.9964	19.0399	17.9545	17.9658	17.7406
Q6PHZ2	Calcium/calmodulin-dependent protein kinase type II subunit delta	Camk2d	10	0.280812	0.000211393	22.5285	22.2332	22.502	22.5427	22.5285	22.2792	22.2185	22.2332
Q8BML9	Glutamine--tRNA ligase	Qars1	23	-0.490009	0.000281618	22.1612	22.6186	22.0459	22.1673	22.1612	22.632	22.6186	22.5938
Q8K482	EMILIN-2	Emilin2	8	0.681473	0.000294404	19.1728	18.4536	19.0426	19.1728	19.1874	18.5127	18.3921	18.4536
O08734	Bcl-2 homologous antagonist/killer	Bak1	4	0.528077	0.000294885	21.1946	20.6628	21.1581	21.1946	21.2877	20.7307	20.6627	20.6627
Q8VCT4	Carboxylesterase 1D	Ces1d	19	-0.711027	0.000297182	22.265	22.9812	22.3962	22.2185	22.265	22.9812	23.0608	22.9707
Q60715	Prolyl 4-hydroxylase subunit alpha-1	P4ha1	1	-0.927923	0.00030281	19.1079	19.9459	19.1307	18.9714	19.1079	19.9459	20.1206	19.9272
Q8R105	Vacuolar protein sorting-associated protein 37C	Vps37c	6	0.811058	0.000316336	20.5731	19.8066	20.7307	20.5638	20.5731	19.8066	19.8906	19.7373
Q5SQM0	Echinoderm microtubule-associated protein-like 6	Eml6	1	6.73673	0.000322841	22.3565	15.0608	22.3565	22.2707	22.3565	14.9562	15.0608	16.7565
P05132	cAMP-dependent protein kinase catalytic subunit alpha	Prkaca	9	0.282768	0.000329177	22.9513	22.6714	22.9513	22.9459	22.9882	22.6475	22.6714	22.7182
P97364	Selenide, water dikinase 2	Sephs2	3	0.945161	0.000335865	19.6114	18.6168	19.4375	19.6114	19.6954	18.6168	18.7005	18.5915
Q9Z266	SNARE-associated protein Snapin	Snapin	1	0.33637	0.000361451	18.417	18.0795	18.3752	18.417	18.4334	18.0795	18.1104	18.0265
Q8CC21	Tetratricopeptide repeat protein 19, mitochondrial	Ttc19	9	0.240925	0.000388282	20.1581	19.9459	20.1581	20.1581	20.2185	19.9459	19.9459	19.92
Q11011	Puromycin-sensitive aminopeptidase	Npepps	39	-0.246695	0.000403046	22.6843	22.9243	22.6364	22.714	22.6843	22.9243	22.9225	22.928
Q8C5W3	Tubulin-specific chaperone cofactor E-like protein	Tbcel	1	-2.93156	0.000422346	15.3857	18.6276	15.3857	15.3588	15.7805	18.7207	17.9714	18.6276
Q9D0I9	Arginine--tRNA ligase, cytoplasmic	Rars1	28	-0.400548	0.000422874	21.6453	22.0886	21.6364	21.6453	21.743	22.0886	22.0918	22.0459
P47915	60S ribosomal protein L29	Rpl29	3	0.200574	0.000443093	22.3538	22.1673	22.3884	22.3457	22.3538	22.1673	22.1825	22.1363
A7RDN6	Renalase	Rnls	2	-2.99423	0.000445319	16.4225	19.4252	17.0009	16.4225	16.1758	19.4252	19.805	19.3516
Q3TE80	RIKEN cDNA 2410002F23 gene	2410002F23Rik	1	-0.7263	0.00045658	17.805	18.4656	17.6382	17.8113	17.805	18.4656	18.5508	18.417
P63024	Vesicle-associated membrane protein 3	Vamp3	1	0.673916	0.000465109	21.7098	21.0625	21.7098	21.8073	21.7056	20.9742	21.0625	21.1642
Q6PDL0	Cytoplasmic dynein 1 light intermediate chain 2	Dync1li2	9	-0.304537	0.000517039	20.6971	20.9951	20.6714	20.6971	20.7223	20.9951	21.0493	20.9601
P63024;P63044	Vesicle-associated membrane protein 3	Vamp2;Vamp3	3	0.818565	0.000517484	22.4324	21.5685	22.5117	22.4324	22.2905	21.5685	21.6843	21.5261
Q6ZQI3	Malectin	Mlec	9	0.459749	0.000534245	21.265	20.8034	21.2066	21.3321	21.265	20.8034	20.8576	20.7634
Q8K1N1	Calcium-independent phospholipase A2-gamma	Pnpla8	8	-0.4423	0.000569711	19.8576	20.2764	19.7553	19.8651	19.8576	20.2185	20.3101	20.2764
Q8BMK4	Cytoskeleton-associated protein 4	Ckap4	32	0.943782	0.00060065	22.0691	21.1079	22.0088	22.0691	22.2096	21.0493	21.2989	21.1079
Q8BLY2	Threonine--tRNA ligase 2, cytoplasmic	Tars3	12	-1.66621	0.000629196	18.6132	20.2989	18.3581	18.6132	18.9488	20.2989	20.3321	20.2877
O70252	Heme oxygenase 2	Hmox2	9	0.409955	0.000642029	21.6886	21.2764	21.6671	21.6886	21.7056	21.2066	21.3484	21.2764
Q9QXK3	Coatomer subunit gamma-2	Copg2	12	0.351444	0.000650805	20.5823	20.2419	20.6096	20.5165	20.5823	20.2419	20.2419	20.1703
P31230	Aminoacyl tRNA synthase complex-interacting multifunctional protein 1	Aimp1	11	-0.797844	0.000657261	21.7098	22.4551	21.4923	21.7098	21.7594	22.4273	22.4726	22.4551
Q8VCX6	KICSTOR complex protein kaptin	Kptn	1	-0.7312	0.000678815	16.9083	17.5805	16.7602	16.9083	16.9316	17.5127	17.7005	17.5805
Q64010	Adapter molecule crk	Crk	10	0.15355	0.000709748	22.0756	21.928	22.0983	22.0559	22.0756	21.928	21.9388	21.9024
P60904	DnaJ homolog subfamily C member 5	Dnajc5	4	0.489815	0.000726	19.5842	19.0769	19.5713	19.6222	19.5842	19.1994	19.0769	19.0319
Q9D1M4	Eukaryotic translation elongation factor 1 epsilon-1	Eef1e1	2	-1.44908	0.000735453	17.5731	19.0638	17.5731	17.8787	17.3921	19.0638	19.1728	18.9545
P27659	60S ribosomal protein L3	Rpl3	16	0.670153	0.000781029	23.0088	22.3857	22.9847	23.0088	23.1332	22.3857	22.4626	22.2678
Q8K010	5-oxoprolinase	Oplah	33	-0.231923	0.000789112	21.2125	21.4726	21.2419	21.2066	21.2125	21.4775	21.4066	21.4726
Q80TT8;Q8VE73	Cullin-9	Cul7;Cul9	1	0.661778	0.000801037	17.8484	17.2042	17.8484	17.977	17.7602	17.2604	17.2042	17.1357
Q9JJG0	Transforming acidic coiled-coil-containing protein 2	Tacc2	13	-0.395336	0.000831946	20.4476	20.8346	20.4476	20.4775	20.3752	20.7715	20.8802	20.8346
O70373	Xin actin-binding repeat-containing protein 1	Xirp1	37	0.313236	0.000835058	22.4751	22.1734	22.4221	22.5285	22.4751	22.1734	22.1301	22.1825
Q9QUR6	Prolyl endopeptidase	Prep	27	0.273569	0.000863849	22.8876	22.5983	22.8708	22.8876	22.9098	22.5983	22.5777	22.6714
P97822	Acidic leucine-rich nuclear phosphoprotein 32 family member E	Anp32e	3	0.402998	0.000866693	21.3266	20.9459	21.4273	21.3266	21.2989	20.9098	20.9882	20.9459
P17742	Peptidyl-prolyl cis-trans isomerase A	Ppia	14	0.349553	0.000874842	25.6125	25.2535	25.6865	25.5841	25.6125	25.2535	25.3273	25.2535
P97333	Neuropilin-1	Nrp1	12	0.341172	0.000889163	19.9601	19.6523	20.0292	19.9601	19.9316	19.6523	19.5823	19.6627
E9PWZ3	Ribosomal protein L3-like	Rpl3l	14	-0.59091	0.000915685	21.4273	21.9916	21.4273	21.4825	21.3156	21.9243	21.9916	22.0821
P26041	Moesin	Msn	39	0.332439	0.000929396	23.8191	23.5045	23.8576	23.8191	23.7594	23.5045	23.5045	23.4298
Q99L88	Beta-1-syntrophin	Sntb1	10	0.865684	0.00096137	20.7056	19.7731	20.4775	20.7796	20.7056	19.7273	19.7731	19.8651
Q7M6Y3	Phosphatidylinositol-binding clathrin assembly protein	Picalm	15	0.378611	0.000968594	22.0122	21.6186	22.0658	22.0122	22.0122	21.6051	21.7307	21.6186
Q9QWV4	Myeloid leukemia factor 1	Mlf1	8	-0.471853	0.000974973	20.3211	20.7955	20.265	20.3645	20.3211	20.7955	20.7056	20.8651
P07361	Alpha-1-acid glycoprotein 2	Orm2	1	2.65302	0.000991768	18.6096	16.0518	18.4854	19.343	18.6096	16.0518	15.9685	16.4587
Q6ZWR6	Nesprin-1	Syne1	16	0.172649	0.00101008	20.8034	20.6453	20.8269	20.7876	20.8034	20.6006	20.6453	20.654
P17182	Alpha-enolase	Eno1	19	0.416455	0.00107303	25.8433	25.3745	25.8433	25.8576	25.792	25.5045	25.3645	25.3745
B2RXS4	Plexin-B2	Plxnb2	20	0.55278	0.0010884	20.417	19.8891	20.417	20.4576	20.3321	19.9171	19.8891	19.7422
P52840	Sulfotransferase 1A1	Sult1a1	1	0.931555	0.00110644	18.8545	17.8606	18.8995	18.6132	18.8545	17.7406	17.8606	17.9714
O35226	26S proteasome non-ATPase regulatory subunit 4	Psmd4	7	0.275727	0.00110791	22.1519	21.8461	22.0983	22.1519	22.1673	21.8307	21.8461	21.9134
Q8BMJ2	Leucine--tRNA ligase, cytoplasmic	Lars1	23	-0.431217	0.00119851	20.4576	20.9171	20.4576	20.417	20.5823	20.9171	20.9459	20.8876
Q9CRB8	Mitochondrial fission process protein 1	Mtfp1	8	-0.510699	0.00121918	24.275	24.7234	24.141	24.275	24.275	24.7234	24.6757	24.824
Q6PHQ8	N-alpha-acetyltransferase 35, NatC auxiliary subunit	Naa35	3	0.671829	0.00123191	18.5127	17.8423	18.5127	18.4046	18.6523	17.786	17.9258	17.8423
G5E8J6	Histidine-rich calcium-binding protein	Hrc	32	-0.494142	0.00123637	23.7389	24.2607	23.6865	23.8576	23.7389	24.1946	24.2607	24.3101
O35295	Transcriptional activator protein Pur-beta	Purb	7	0.278165	0.00125087	21.6843	21.4015	21.6453	21.6843	21.7182	21.3592	21.4526	21.4015
O70400	PDZ and LIM domain protein 1	Pdlim1	15	0.269069	0.00127812	23.6971	23.4425	23.6971	23.7594	23.6649	23.4425	23.4676	23.4041
P39054;Q8BZ98	Dynamin-2	Dnm2;Dnm3	8	0.179457	0.00129667	22.0723	21.8802	22.0918	22.0724	22.0658	21.8727	21.9388	21.8802
P45376	Aldo-keto reductase family 1 member B1	Akr1b1	20	-0.224613	0.00133846	26.0935	26.3118	26.0935	26.1055	26.0359	26.2678	26.329	26.3118
P57759	Endoplasmic reticulum resident protein 29	Erp29	7	0.357127	0.00135476	22.3672	22.0258	22.3017	22.3672	22.3672	22.0258	22.0292	21.9098
A2AGL3;E9Q401	Ryanodine receptor 3	Ryr2;Ryr3	10	-0.293832	0.00137318	23.3376	23.6096	23.3376	23.3101	23.3645	23.5869	23.6096	23.6971
Q60634	Flotillin-2	Flot2	22	0.613985	0.00139582	21.6409	21.0756	21.7955	21.6409	21.5823	20.9742	21.1269	21.0756
Q8VE91	Reticulophagy regulator 1	Retreg1	1	0.986582	0.00146327	18.5165	17.3836	18.5165	18.5356	18.185	17.5356	17.3581	17.3836
Q9JI75	Ribosyldihydronicotinamide dehydrogenase [quinone]	Nqo2	10	-0.339766	0.00146365	22.9951	23.2961	22.9951	22.8858	23.0156	23.3376	23.2821	23.2961
Q8R404	MICOS complex subunit MIC13	Micos13	4	-0.103505	0.0014793	23.2375	23.3376	23.2375	23.2288	23.2492	23.3645	23.3239	23.3376
Q64028	Polyhomeotic-like protein 1	Phc1	1	-3.58879	0.00148412	16.0562	19.9243	15.5657	16.0562	16.371	19.9243	20.0426	18.7923
Q9ET01;Q9WUB3	Glycogen phosphorylase, liver form	Pygl;Pygm	1	-0.252878	0.00149212	23.8288	24.1015	23.8576	23.8093	23.8288	24.1253	24.1015	24.0275
Q8BW75	Amine oxidase [flavin-containing] B	Maob	23	-0.478565	0.00150744	22.5869	23.0691	22.5869	22.5189	22.632	23.0691	23.1426	22.9619
Q9D7V1	SH2 domain-containing protein 4A	Sh2d4a	2	1.0595	0.001524	19.0238	17.9431	19.2326	18.9798	19.0238	18.2419	17.8727	17.9431
Q8VDP3	[F-actin]-monooxygenase MICAL1	Mical1	5	0.475823	0.00153088	19.4375	18.9658	19.5318	19.4375	19.3452	18.9658	19.0129	18.9083
A2ASQ1	Agrin	Agrn	11	0.744092	0.00161138	21.6453	20.9243	21.6453	21.5638	21.7223	20.9243	21.0359	20.7389
P62746;Q62159;Q9QUI0	Rho-related GTP-binding protein RhoB	Rhoa;Rhob;Rhoc	1	0.245892	0.00167379	21.4626	21.2535	21.4626	21.4825	21.4576	21.2535	21.2535	21.1581
Q9CZD3	Glycine--tRNA ligase	Gars1	22	0.293569	0.00175945	22.4676	22.1457	22.4972	22.4676	22.4425	22.2477	22.1332	22.1457
Q8BTM8;Q8VHX6	Filamin-A	Flna;Flnc	2	0.316413	0.00179764	22.3511	22.0325	22.3511	22.3778	22.2821	22.0326	22.0691	21.9601
Q8BYJ6	TBC1 domain family member 4	Tbc1d4	16	-0.452173	0.00182729	20.1946	20.5915	20.1946	20.1703	20.2066	20.5731	20.7634	20.5915
Q80UJ7	Rab3 GTPase-activating protein catalytic subunit	Rab3gap1	3	0.59946	0.00189832	18.1898	17.6523	18.1053	18.3189	18.1898	17.4972	17.6523	17.6662
Q3TLP5	Enoyl-CoA hydratase domain-containing protein 2, mitochondrial	Echdc2	9	-0.31424	0.00190843	23.632	23.9406	23.6971	23.6096	23.632	24.0275	23.9134	23.9406
Q924C1	Exportin-5	Xpo5	5	0.62354	0.00202312	18.3709	17.805	18.3709	18.606	18.3624	17.805	17.7731	17.8906
Q8BL66	Early endosome antigen 1	Eea1	25	0.453871	0.00203178	20.417	19.8995	20.4576	20.417	20.3211	19.8995	20.0426	19.8921
Q9CX13	Protein cornichon homolog 4	Cnih4	1	0.313902	0.00206367	22.6209	22.265	22.4898	22.6231	22.6209	22.265	22.2593	22.2678
Q9DBR7	Protein phosphatase 1 regulatory subunit 12A	Ppp1r12a	25	0.458159	0.0021126	20.9951	20.4676	20.9531	21.0156	20.9951	20.4676	20.654	20.4676
Q9JLC8	Sacsin	Sacs	12	0.553764	0.00211468	19.5337	18.9714	19.5337	19.4293	19.647	18.9083	19.0691	18.9714
Q99MN1	Lysine--tRNA ligase	Kars1	18	-0.467251	0.00211496	21.632	22.1269	21.5498	21.632	21.7715	22.1269	22.1363	22.0918
O08715	A-kinase anchor protein 1, mitochondrial	Akap1	12	0.481356	0.00219643	20.7715	20.3645	20.9024	20.7715	20.7715	20.2302	20.3645	20.4066
P05132;P68181	cAMP-dependent protein kinase catalytic subunit alpha	Prkaca;Prkacb	10	0.273893	0.0022367	23.4676	23.1612	23.4676	23.3645	23.4676	23.1612	23.1916	23.1253
O88844	Isocitrate dehydrogenase [NADP] cytoplasmic	Idh1	22	-0.263902	0.00224716	22.5731	22.8746	22.5662	22.5892	22.5731	22.8802	22.7655	22.8745
Q11136	Xaa-Pro dipeptidase	Pepd	11	0.33455	0.00226344	21.1206	20.7796	21.0359	21.1765	21.1206	20.7307	20.7796	20.8191
Q9WVQ5	Methylthioribulose-1-phosphate dehydratase	Apip	9	-0.181738	0.0022919	22.7735	22.9423	22.7265	22.7735	22.7955	22.9777	22.9424	22.9207
P21107	Tropomyosin alpha-3 chain	Tpm3	7	0.276668	0.00232155	22.1111	21.8269	22.1079	22.1111	22.1581	21.8269	21.9207	21.7995
P49615	Cyclin-dependent kinase 5	Cdk5	5	-0.29752	0.00233284	19.9882	20.2419	19.8772	19.9882	20.002	20.2877	20.2419	20.2302
P61027	Ras-related protein Rab-10	Rab10	10	0.236134	0.00236615	23.7895	23.5754	23.8288	23.7796	23.7895	23.6096	23.5754	23.5045
Q9R0P9	Ubiquitin carboxyl-terminal hydrolase isozyme L1	Uchl1	6	0.99546	0.00237784	22.4476	21.5213	22.4476	22.6051	22.4041	21.5213	21.7013	21.2477
Q61503	5'-nucleotidase	Nt5e	6	1.26514	0.00238723	21.1143	19.8621	21.1143	21.2066	21.0756	19.8621	20.1825	19.5564
Q8BWB1	Synaptopodin 2-like protein	Synpo2l	28	0.760837	0.00240257	23.3778	22.5427	23.3778	23.4676	23.178	22.48	22.7182	22.5427
Q9JJL8	Serine--tRNA ligase, mitochondrial	Sars2	7	-0.26797	0.00240637	20.654	20.9388	20.6627	20.6276	20.654	20.9388	20.8423	20.9672
Q3UN02	Lysocardiolipin acyltransferase 1	Lclat1	10	0.280221	0.00241097	22.4221	22.1519	22.4221	22.4923	22.3538	22.1519	22.1238	22.1519
Q3TPX4	Exocyst complex component 5	Exoc5	5	0.832942	0.00241992	19.1079	18.1655	19.1946	19.1079	18.8727	18.1357	18.1655	18.3752
Q9R112	Sulfide:quinone oxidoreductase, mitochondrial	Sqor	19	-0.491725	0.00242123	22.9298	23.391	22.9742	22.8385	22.9298	23.5165	23.391	23.3101
Q8CC86	Nicotinate phosphoribosyltransferase	Naprt	8	-0.44647	0.00243123	20.1946	20.6006	20.1206	20.2764	20.1946	20.7389	20.5915	20.6006
Q66GT5	Phosphatidylglycerophosphatase and protein-tyrosine phosphatase 1	Ptpmt1	7	0.259751	0.00243924	20.4576	20.1946	20.4972	20.4576	20.4066	20.1457	20.1946	20.2419
Q91YP2	Neurolysin, mitochondrial	Nln	13	0.595221	0.00248812	21.1457	20.4874	21.1765	21.1457	20.9672	20.4874	20.4066	20.6096
Q9CR42	Ankyrin repeat domain-containing protein 1	Ankrd1	10	1.62354	0.00255396	21.2006	19.5988	21.2006	21.3045	21.1015	19.9742	19.5988	19.163
P07361;Q60590	Alpha-1-acid glycoprotein 2	Orm1;Orm2	2	1.32099	0.00265723	20.0559	18.8392	19.9459	20.5069	20.0559	18.8392	-0.330992	0.00308093
Q62048	Astrocytic phosphoprotein PEA-15	Pea15	3	1.05586	0.00268728	20.1332	18.9083	20.1332	19.9316	20.2185	18.8995	19.3079	18.9083
A2AJI0	MAP7 domain-containing protein 1	Map7d1	18	-0.26184	0.00269322	21.1269	21.4015	21.0691	21.1269	21.1581	21.4015	21.417	21.3211
Q07076	Annexin A7	Anxa7	18	0.371682	0.00272441	22.6387	22.3239	22.6364	22.6714	22.6386	22.3403	22.3239	22.1673
Q9WV60	Glycogen synthase kinase-3 beta	Gsk3b	7	0.241777	0.00277277	21.3266	21.1206	21.3857	21.3266	21.3156	21.1206	21.1395	21.0426
Q8WTY4	Anamorsin	Ciapin1	4	-0.391745	0.00283092	20.1332	20.5638	20.1332	20.1206	20.2989	20.6096	20.5638	20.5545
Q68FE6	Rho family-interacting cell polarization regulator 1	Ripor1	3	-0.746956	0.00283963	17.3581	18.1457	17.1752	17.5432	17.3581	18.1457	18.1507	18.0211
P54310	Hormone-sensitive lipase	Lipe	6	-0.701845	0.00287067	19.7586	20.5545	19.9601	19.7223	19.7586	20.6276	20.5545	20.3645
P62962	Profilin-1	Pfn1	12	0.41806	0.00289032	26.17	25.767	26.1946	26.17	26.0772	25.797	25.767	25.6237
Q06138	Calcium-binding protein 39	Cab39	17	-0.143432	0.00290445	22.3073	22.4324	22.3073	22.3156	22.2961	22.4923	22.4324	22.4247
Q99MR8	Methylcrotonoyl-CoA carboxylase subunit alpha, mitochondrial	Mccc1	35	-0.113599	0.0029146	24.1795	24.2961	24.1719	24.1795	24.217	24.2961	24.2891	24.3239
P10649;Q80W21	Glutathione S-transferase Mu 1	Gstm1;Gstm7	1	-0.453225	0.00301279	23.4298	23.9406	23.4298	23.4676	23.391	23.7492	23.9584	23.9406
P48453;P63328	Serine/threonine-protein phosphatase 2B catalytic subunit beta isoform	Ppp3ca;Ppp3cb	2	0.287869	0.00303311	20.9882	20.7389	21.0559	20.9672	20.9882	20.6453	20.7634	20.7389
P16332	Methylmalonyl-CoA mutase, mitochondrial	Mmut	27	-0.285079	0.0030606	23.8191	24.0772	23.7594	23.8191	23.8191	24.0772	24.019	24.1565
Q8R0Y8	Mitochondrial coenzyme A transporter SLC25A42	Slc25a42	15	-0.330992	0.00308093	22.4067	22.7856	22.391	22.4375	22.4066	22.7995	22.6431	22.7856
G5E8K5	Ankyrin-3	Ank3	26	0.377076	0.00314471	20.9812	20.5545	21.0156	20.9812	20.895	20.5545	20.68	20.5261
Q8BVI4	Dihydropteridine reductase	Qdpr	10	-0.130082	0.00314849	23.2821	23.417	23.2434	23.2821	23.2961	23.3778	23.417	23.417
Q6NZC7	SEC23-interacting protein	Sec23ip	12	0.278992	0.00315297	20.6186	20.3101	20.6186	20.6006	20.654	20.2989	20.4273	20.3101
Q3U0V1;Q91WJ8	Far upstream element-binding protein 2	Fubp1;Khsrp	2	0.402196	0.00316779	20.2066	19.8331	20.2535	20.1079	20.2066	19.8331	19.8346	19.6937
Q8R5A0	N-lysine methyltransferase SMYD2	Smyd2	4	0.624811	0.00318131	19.8484	19.1728	19.9601	19.8034	19.8484	19.419	19.1457	19.1728
Q8BP47	Asparagine--tRNA ligase, cytoplasmic	NARS1	10	0.16254	0.00323727	22.1426	21.9742	22.1426	22.1612	22.1332	21.9742	22.0292	21.9459
Q91XB7	Protein YIF1A	Yif1a	3	0.330313	0.00331155	19.2279	18.9142	19.2279	19.3012	19.209	18.9937	18.9141	18.8392
Q8K0D5	Elongation factor G, mitochondrial	Gfm1	27	-0.319136	0.00343125	23.2346	23.5869	23.1901	23.2821	23.2346	23.5869	23.4676	23.6096
P39054	Dynamin-2	Dnm2	20	0.265451	0.00344706	21.7876	21.5213	21.7915	21.7348	21.7876	21.5213	21.5638	21.4324
Q6TEK5	Vitamin K epoxide reductase complex subunit 1-like protein 1	Vkorc1l1	3	0.458047	0.0034538	20.5915	20.1079	20.5545	20.5915	20.5915	20.1079	20.002	20.2535
P47856	Glutamine--fructose-6-phosphate aminotransferase [isomerizing] 1	Gfpt1	3	0.704217	0.00346991	19.3299	18.624	19.0925	19.4375	19.3299	18.6417	18.4815	18.624
O55143	Sarcoplasmic/endoplasmic reticulum calcium ATPase 2	Atp2a2	74	-0.169626	0.00348963	28.5898	28.7645	28.5682	28.5898	28.632	28.7325	28.7645	28.8019
Q7TMK9	Heterogeneous nuclear ribonucleoprotein Q	Syncrip	18	0.228707	0.00349725	22.3619	22.1488	22.3511	22.44	22.3619	22.1488	22.2006	22.1174
P52293	Importin subunit alpha-1	Kpna2	2	-0.457003	0.00349901	17.6731	18.1556	17.7273	17.6731	17.5731	18.1556	17.9992	18.1898
Q9D172	Glutamine amidotransferase-like class 1 domain-containing protein 3, mitochondrial	Gatd3	11	-0.163864	0.00350381	26.0359	26.1776	26.002	26.0359	26.0629	26.1776	26.1776	26.2372
Q99KK7	Dipeptidyl peptidase 3	Dpp3	21	0.282879	0.0035042	21.6006	21.2821	21.5165	21.632	21.6006	21.3592	21.2593	21.2821
Q61206	Platelet-activating factor acetylhydrolase IB subunit alpha2	Pafah1b2	4	0.337282	0.0035772	23.3376	23.0054	23.2821	23.3376	23.4425	23.0054	23.0707	22.9742
Q9QZ08	N-acetyl-D-glucosamine kinase	Nagk	9	0.324202	0.0035875	21.5261	21.2066	21.4626	21.5823	21.5261	21.1269	21.265	21.2066
Q99PR8	Heat shock protein beta-2	Hspb2	6	0.120192	0.0036081	23.5165	23.417	23.5165	23.5522	23.5165	23.417	23.4298	23.3778
G5E8V9	Arfaptin-1	Arfip1	8	0.627181	0.00363701	19.7223	19.2255	19.7072	19.7223	19.9272	19.2396	19.2255	19.0102
Q3UNZ8	Quinone oxidoreductase-like protein 2	Cryzl2	5	0.755047	0.00363968	19.1307	18.4375	19.3387	19.1307	19.1079	18.4375	18.265	18.6096
Q7TPW1	Nexilin	Nexn	26	0.422825	0.00367015	23.1856	22.714	23.2361	23.1856	23.019	22.7675	22.6907	22.714
Q61070	Etoposide-induced protein 2.4	Ei24	5	0.431444	0.0036719	20.4067	19.9459	20.4273	20.343	20.4066	19.8545	20.0821	19.9459
P97447	Four and a half LIM domains protein 1	Fhl1	8	0.78511	0.00371868	23.3645	22.6584	23.3645	23.5522	23.2678	22.4196	22.7512	22.6584
Q9QZ57	Heat shock protein beta-3	Hspb3	4	0.256989	0.00375903	20.5069	20.2185	20.4676	20.5545	20.5069	20.2185	20.3211	20.2185
O08804	NK13	Serpinb6b	17	0.574975	0.00383953	22.9061	22.3045	22.9061	22.9672	22.8113	22.4726	22.1825	22.3045
Q60936	Atypical kinase COQ8A, mitochondrial	Coq8a	20	-0.117708	0.00390856	24.7129	24.8142	24.6865	24.7286	24.7129	24.8093	24.8142	24.8576
Q8C129	Leucyl-cystinyl aminopeptidase	Lnpep	30	0.133128	0.003918	22.4247	22.3101	22.4144	22.4247	22.4849	22.3129	22.3101	22.3017
P16546	Spectrin alpha chain, non-erythrocytic 1	Sptan1	176	0.137378	0.00397665	24.2463	24.1253	24.2463	24.239	24.2463	24.1253	24.1332	24.0608
O08917	Flotillin-1	Flot1	22	0.706024	0.00404871	21.8987	21.1825	22.0559	21.8987	21.714	21.0691	21.2989	21.1825
P70170	ATP-binding cassette sub-family C member 9	Abcc9	25	-0.0724608	0.00413245	21.0625	21.1457	21.0951	21.0559	21.0625	21.1395	21.1457	21.1457
Q3ULD5	Methylcrotonoyl-CoA carboxylase beta chain, mitochondrial	Mccc2	25	-0.110483	0.00414341	23.5754	23.6865	23.6096	23.5638	23.5754	23.6865	23.6757	23.7182
P63242	Eukaryotic translation initiation factor 5A-1	Eif5a	9	0.124018	0.00415607	23.632	23.5165	23.6096	23.6431	23.632	23.4676	23.5165	23.5285
Q9JHH6	Carboxypeptidase B2	Cpb2	1	1.67395	0.00416921	17.7471	16.2958	18.1407	17.6523	17.7471	16.5166	16.2958	15.7058
E9Q401	Ryanodine receptor 2	Ryr2	198	-0.231237	0.00425863	24.0526	24.275	24.0608	24.0526	24.0359	24.217	24.275	24.3511
Q91WP6	Serine protease inhibitor A3N	Serpina3n	4	1.1801	0.00432862	20.2066	19.113	20.1703	20.5356	20.2066	19.113	19.417	18.8423
Q9QZF2	Glypican-1	Gpc1	12	-0.42078	0.00433874	21.743	22.1206	21.743	21.7471	21.6627	22.2621	22.1206	22.0326
Q8BP67	60S ribosomal protein L24	Rpl24	6	0.183294	0.00449723	23.4298	23.217	23.4298	23.4298	23.4298	23.217	23.3101	23.2125
P21126	Ubiquitin-like protein 4A	Ubl4a	4	0.903694	0.0045019	19.597	18.8697	19.597	19.5805	19.7373	18.4375	18.8965	18.8697
P10649	Glutathione S-transferase Mu 1	Gstm1	20	-0.320784	0.00450366	25.4488	25.7745	25.5255	25.341	25.4488	25.7286	25.7746	25.7746
P10649;P15626;Q80W21;Q8R5I6	Glutathione S-transferase Mu 1	Gstm1;Gstm2;Gstm4;Gstm7	1	-0.359436	0.00451046	25.1253	25.4394	25.1871	25.1253	25.0359	25.4394	25.4234	25.5638
P14115	60S ribosomal protein L27a	Rpl27a	3	0.183342	0.00456065	25.1604	24.9584	25.1332	25.1604	25.1871	24.9584	25.0317	24.9406
O09110	Dual specificity mitogen-activated protein kinase kinase 3	Map2k3	9	0.327482	0.00467932	19.9301	19.6204	19.8515	19.9882	19.9301	19.6204	19.5146	19.6523
Q9WUP7	Ubiquitin carboxyl-terminal hydrolase isozyme L5	Uchl5	7	0.168916	0.00470384	20.4476	20.2877	20.5165	20.4476	20.417	20.2877	20.2989	20.2877
Q68FL6	Methionine--tRNA ligase, cytoplasmic	Mars1	15	-1.63127	0.00472143	18.9601	20.5731	18.9601	18.417	19.3983	20.6186	20.5731	20.4775
Q8R3S6	Exocyst complex component 1	Exoc1	5	0.39691	0.00475835	18.8018	18.3365	18.7731	18.8018	18.8238	18.3365	18.5394	18.3321
Q9QYI3	DnaJ homolog subfamily C member 7	Dnajc7	5	0.279304	0.00476426	19.4435	19.163	19.4952	19.4435	19.3452	19.163	19.1777	19.1053
P28474	Alcohol dehydrogenase class-3	Adh5	15	0.0885855	0.00478328	23.1612	23.0756	23.1612	23.1612	23.1534	23.0935	23.0409	23.0756
O35239	Tyrosine-protein phosphatase non-receptor type 9	Ptpn9	1	0.515561	0.00478944	19.0047	18.4496	18.8392	19.0047	19.0638	18.562	18.3495	18.4496
Q8C052	Microtubule-associated protein 1S	Map1s	4	0.321049	0.00482812	19.6024	19.3079	19.729	19.6024	19.5564	19.3079	19.2673	19.3495
Q3TZX3	Solute carrier family 25 member 33	Slc25a33	3	1.01216	0.0048951	18.83	17.8175	18.83	18.5356	19.0453	17.8175	17.6024	17.9545
P48453;P48455;P63328	Serine/threonine-protein phosphatase 2B catalytic subunit beta isoform	Ppp3ca;Ppp3cb;Ppp3cc	4	0.126115	0.00491156	22.4751	22.3376	22.4898	22.4551	22.4751	22.3857	22.3184	22.3376
Q8CI51	PDZ and LIM domain protein 5	Pdlim5	22	0.267635	0.00492444	27.1604	26.8623	27.189	27.1604	27.0401	26.8385	26.8858	26.8623
Q9CQV1	Mitochondrial import inner membrane translocase subunit TIM16	Pam16	8	-0.0533943	0.00498165	20.8269	20.8802	20.8269	20.8346	20.8113	20.8876	20.8651	20.8802
Q6XPS7	L-threonine aldolase	Tha1	11	-0.216261	0.00499327	22.3073	22.538	22.3752	22.3073	22.2905	22.5915	22.4923	22.538
Q9Z2A5	Arginyl-tRNA--protein transferase 1	Ate1	4	0.562358	0.00509451	20.2989	19.6835	20.2989	20.3538	20.2877	19.624	19.6835	19.9459
P98156	Very low-density lipoprotein receptor	Vldlr	9	0.346138	0.00516596	20.2419	19.898	20.2185	20.3538	20.2419	20.0156	19.898	19.8621
Q62188	Dihydropyrimidinase-related protein 3	Dpysl3	19	0.870112	0.00529105	23.2821	22.3538	23.2492	23.2821	23.3376	22.1886	22.7161	22.3538
P16675	Lysosomal protective protein	Ctsa	4	-0.450424	0.00541405	19.9882	20.4476	19.9882	19.895	20.0156	20.4476	20.5261	20.2764
P56375	Acylphosphatase-2	Acyp2	7	-0.304928	0.00545628	23.4041	23.7695	23.391	23.4923	23.4041	23.6431	23.7895	23.7695
P68372;P99024;Q7TMM9;Q922F4;Q9CWF2	Tubulin beta-4B chain	Tubb2a;Tubb2b;Tubb4b;Tubb5;Tubb6	1	0.166016	0.00553862	23.0526	22.8746	23.0526	23.0207	23.0902	22.9334	22.8576	22.8745
Q99P30	Peroxisomal coenzyme A diphosphatase NUDT7	Nudt7	6	-0.619844	0.00558096	22.3073	22.8651	22.2564	22.3073	22.3565	22.8651	22.7735	23.141
A0A2I3BR81	5'-nucleotidase domain-containing 2	Nt5dc2	5	0.355186	0.00560677	18.7602	18.4293	18.6731	18.7634	18.7602	18.4293	18.2604	18.4415
A0A075B677	Immunoglobulin kappa variable 4-53	Igkv4-53	2	2.51667	0.00569145	17.8846	15.2175	18.6204	17.2877	17.8847	15.092	15.2175	15.9332
Q6NSR8	Probable aminopeptidase NPEPL1	Npepl1	8	-0.152415	0.00575518	21.0224	21.1457	21.0224	21.0224	20.9531	21.1269	21.1825	21.1457
P47911	60S ribosomal protein L6	Rpl6	16	0.207105	0.00576328	24.1488	23.9495	24.1488	24.1095	24.1642	23.9495	23.9847	23.867
Q8JZY2	COMM domain-containing protein 10	Commd10	2	1.19077	0.00579766	17.8361	16.7602	17.6869	17.8361	17.9658	16.7602	16.2363	16.92
E9Q4P1	WD repeat and FYVE domain-containing protein 1	Wdfy1	4	2.59633	0.00579802	19.3495	17.0426	19.3495	19.3495	19.4835	15.8694	17.0426	17.4815
Q61187	Tumor susceptibility gene 101 protein	Tsg101	11	0.201849	0.00583985	21.2066	20.9812	21.2419	21.2066	21.1946	20.9742	21.0821	20.9812
P53026	60S ribosomal protein L10a	Rpl10a	9	0.176015	0.0058479	23.2535	23.0854	23.2273	23.2535	23.3239	23.0691	23.1222	23.0854
Q6ZWX6	Eukaryotic translation initiation factor 2 subunit 1	Eif2s1	16	0.0956071	0.00591877	21.953	21.8423	21.9531	21.9707	21.9316	21.8423	21.8839	21.8423
Q8CIH5	1-phosphatidylinositol 4,5-bisphosphate phosphodiesterase gamma-2	Plcg2	8	0.906015	0.00593794	18.8515	18.0847	18.6937	19.1679	18.8515	18.1053	18.0847	17.805
Q8C0Z1	Protein FAM234A	Fam234a	5	-0.141289	0.00600914	20.3962	20.5069	20.3321	20.3962	20.4066	20.5069	20.5451	20.5069
Q9D113	DNL-type zinc finger protein	Dnlz	2	0.299489	0.00601776	21.5685	21.2419	21.4775	21.5685	21.6276	21.2066	21.3266	21.2419
Q3UCV8	Ubiquitin thioesterase otulin	Otulin	4	0.577511	0.00605945	18.6869	18.0899	18.8207	18.6869	18.4894	18.1752	18.0899	17.9992
Q7TQI3	Ubiquitin thioesterase OTUB1	Otub1	8	0.367267	0.0061017	22.7348	22.3348	22.7348	22.632	22.8307	22.3348	22.3184	22.4425
P26638	Serine--tRNA ligase, cytoplasmic	Sars1	12	0.404396	0.00613006	22.5451	22.1519	22.4324	22.5451	22.6671	22.0789	22.2006	22.1519
Q5SQX6	Cytoplasmic FMR1-interacting protein 2	Cyfip2	3	0.887287	0.00617543	18.0951	17.2604	18.4815	18.0951	17.9431	17.2604	17.2137	17.3836
Q9JJ80	Ribosome production factor 2 homolog	Rpf2	1	0.522491	0.00624673	18.2419	17.7537	18.3233	18.2419	18.1053	17.7537	17.5508	17.7987
P56695	Wolframin	Wfs1	19	0.136283	0.00626658	22.0592	21.928	22.0854	22.0592	22.0292	21.8839	21.9531	21.928
Q9Z0H4	CUGBP Elav-like family member 2	Celf2	4	0.513343	0.00628674	21.3156	20.8034	21.3156	21.2244	21.3211	20.8034	20.9171	20.6006
Q64444	Carbonic anhydrase 4	Ca4	4	-0.268522	0.00639936	20.8576	21.0756	20.8576	20.7471	20.8727	21.0493	21.0756	21.1581
Q80XU3	Nuclear ubiquitous casein and cyclin-dependent kinase substrate 1	Nucks1	2	0.559326	0.00643479	20.8576	20.3101	20.8651	20.8576	20.7307	20.3962	20.3101	20.0691
A2RSY6	TRMT1-like protein	Trmt1l	2	1.34306	0.00654206	16.6382	15.2326	16.6382	16.7207	16.5642	15.2326	14.8934	15.768
Q8R033	LYR motif-containing protein 2	Lyrm2	3	0.264841	0.00657065	19.4129	19.1382	19.4129	19.3752	19.4211	19.0532	19.2232	19.1382
O54692	Centromere/kinetochore protein zw10 homolog	Zw10	1	1.27908	0.0065731	17.3321	16.1688	17.1655	17.5127	17.3321	16.1688	16.3803	15.624
Q9EQ20	Methylmalonate-semialdehyde dehydrogenase [acylating], mitochondrial	Aldh6a1	33	-0.154744	0.00657602	25.5014	25.6703	25.5551	25.4707	25.5014	25.6891	25.632	25.6703
P55096	ATP-binding cassette sub-family D member 3	Abcd3	18	-0.6137	0.00658582	21.4923	22.1673	21.4273	21.4923	21.5498	22.1673	21.8839	22.2593
Q99J23	GH3 domain-containing protein	Ghdc	3	1.76519	0.00659509	17.6869	15.7808	17.6869	18.0265	17.6731	15.6439	16.6662	15.7808
P63321;Q9JIW9	Ras-related protein Ral-A	Rala;Ralb	3	0.211952	0.00660956	22.9352	22.7471	23.0071	22.9352	22.9207	22.6865	22.7935	22.7471
Q9DBP5	UMP-CMP kinase	Cmpk1	10	0.168833	0.00661202	23.0576	22.8932	23.0674	23.0575	23.002	22.9043	22.8932	22.823
Q8BWB1;Q91YE8	Synaptopodin 2-like protein	Synpo2;Synpo2l	1	0.583033	0.00662788	21.5356	20.9459	21.5356	21.7389	21.417	21.1015	20.895	20.9459
P08226	Apolipoprotein E	Apoe	15	0.47779	0.00671436	21.7553	21.2764	21.7553	21.714	21.8461	21.2764	21.4476	21.1581
P97328	Ketohexokinase	Khk	1	-0.523009	0.0067597	18.4576	18.8636	18.2558	18.4656	18.4576	18.8636	19.0638	18.8207
P97927	Laminin subunit alpha-4	Lama4	36	0.182103	0.00687377	22.3752	22.1946	22.3321	22.3752	22.4247	22.155	22.1946	22.2361
Q3UQ84	Threonine--tRNA ligase, mitochondrial	Tars2	19	-0.190706	0.00689386	20.7389	20.9601	20.714	20.8191	20.7389	20.9601	20.9098	20.9742
Q920Q8	Influenza virus NS1A-binding protein homolog	Ivns1abp	4	0.592772	0.00693288	21.1206	20.4972	21.1206	21.2419	21.1015	20.417	20.7715	20.4972
O70572	Sphingomyelin phosphodiesterase 2	Smpd2	10	0.260756	0.00693932	20.8727	20.6006	20.8727	20.9672	20.8576	20.6006	20.6006	20.714
Q9CRC8	Leucine-rich repeat-containing protein 40	Lrrc40	3	0.594268	0.0069506	19.002	18.2922	19.002	18.9431	19.0453	18.2877	18.6276	18.2922
P51410	60S ribosomal protein L9	Rpl9	8	0.192233	0.00695767	23.2679	23.0658	23.2678	23.2678	23.2535	23.0088	23.1379	23.0658
O70456;P61982;P62259;P63101;P68254;P68510;Q9CQV8	14-3-3 protein sigma	Sfn;Ywhab;Ywhae;Ywhag;Ywhah;Ywhaq;Ywhaz	3	0.191525	0.00701489	27.8445	27.6865	27.9428	27.8264	27.8445	27.6931	27.6865	27.6595
Q7TQG1	Pleckstrin homology domain-containing family A member 6	Plekha6	12	0.947594	0.00701611	20.5823	19.6364	20.6276	20.2302	20.5823	19.2604	19.6364	19.7005
Q3UIZ8	Myosin light chain kinase 3	Mylk3	24	-1.69203	0.00702007	21.4775	23.4298	21.4775	21.2989	21.6886	23.4298	23.5522	22.5592
P10649;P15626;Q80W21	Glutathione S-transferase Mu 1	Gstm1;Gstm2;Gstm7	1	-0.237317	0.00707671	25.1095	25.3477	25.1984	25.1095	25.0401	25.3477	25.3712	25.341
Q8VE95	UPF0598 protein C8orf82 homolog		9	-0.148276	0.00716212	22.2273	22.3592	22.1946	22.2361	22.2273	22.3592	22.3266	22.417
Q9D8W5	26S proteasome non-ATPase regulatory subunit 12	Psmd12	21	0.166712	0.00721993	22.4775	22.3211	22.5213	22.4775	22.4576	22.2707	22.3645	22.3211
P56565	Protein S100-A1	S100a1	5	0.771511	0.00727428	22.44	21.823	22.4093	22.44	22.6096	21.4375	21.823	21.8839
O88342	WD repeat-containing protein 1	Wdr1	24	0.371432	0.00729866	25.217	24.7846	25.217	25.2354	25.065	24.895	24.7846	24.7234
Q8BIG7	Catechol O-methyltransferase domain-containing protein 1	Comtd1	4	0.372694	0.00739841	20.4576	20.1332	20.5261	20.3857	20.4576	20.1332	20.1581	19.9601
Q9WUA3	ATP-dependent 6-phosphofructokinase, platelet type	Pfkp	17	0.530291	0.00750877	22.8423	22.239	22.6364	22.8538	22.8423	22.239	22.3884	22.1143
P22315	Ferrochelatase, mitochondrial	Fech	11	0.242362	0.00754882	23.4676	23.2185	23.4676	23.5045	23.3645	23.2361	23.155	23.2185
P27546	Microtubule-associated protein 4	Map4	39	0.207193	0.00756249	23.087	22.9116	23.0509	23.087	23.1426	22.9243	22.9116	22.823
Q3UL36	Arginine and glutamate-rich protein 1	Arglu1	1	-1.14628	0.00763743	16.7731	17.9142	17.2512	16.5775	16.7731	18.2419	17.9141	17.8847
Q8CHS7	Dehydrogenase/reductase SDR family member 7C	Dhrs7c	11	-0.365274	0.00789863	22.0122	22.3403	22.0122	22.0983	21.9812	22.3403	22.5261	22.3211
Q9CQC9	GTP-binding protein SAR1b	Sar1b	4	-0.243534	0.00791336	21.1332	21.3484	21.002	21.1332	21.1519	21.3484	21.3592	21.3101
Q9JKS4	LIM domain-binding protein 3	Ldb3	36	0.168631	0.00794891	27.8682	27.6931	27.8799	27.8682	27.7895	27.6998	27.6389	27.6931
Q9CT10	Ran-binding protein 3	Ranbp3	8	0.200637	0.00796273	19.6505	19.4211	19.6505	19.661	19.5508	19.3836	19.4211	19.4556
Q9DBG7	Signal recognition particle receptor subunit alpha	Srpra	12	-0.364546	0.00803163	19.786	20.0821	19.734	19.786	19.7876	20.0426	20.2764	20.0821
Q7TNG5	Echinoderm microtubule-associated protein-like 2	Eml2	16	0.2047	0.00803225	22.7533	22.5093	22.7594	22.6409	22.7533	22.4874	22.5427	22.5093
Q91X72	Hemopexin	Hpx	16	1.0213	0.00808467	24.558	23.6649	24.4425	25.1095	24.558	23.6649	23.7492	23.632
Q7TSE6	Serine/threonine-protein kinase 38-like	Stk38l	1	-1.74554	0.00809294	17.3233	19.4556	17.9714	17.3233	17.3056	19.4556	19.654	18.7273
Q62261	Spectrin beta chain, non-erythrocytic 1	Sptbn1	151	0.102526	0.00828585	24.0275	23.9225	24.0359	24.002	24.0275	23.9225	23.9495	23.8858
Q923T9	Calcium/calmodulin-dependent protein kinase type II subunit gamma	Camk2g	7	0.106314	0.00832409	21.6231	21.5213	21.6584	21.5869	21.6231	21.5261	21.5213	21.502
P47857	ATP-dependent 6-phosphofructokinase, muscle type	Pfkm	35	-0.129999	0.00846926	26.0422	26.1814	26.0629	26.0062	26.0422	26.1814	26.1253	26.1946
Q5FWK3	Rho GTPase-activating protein 1	Arhgap1	10	0.368251	0.00847121	21.3156	20.895	21.3156	21.265	21.3805	20.895	21.0886	20.8727
Q6P3A8	2-oxoisovalerate dehydrogenase subunit beta, mitochondrial	Bckdhb	7	-0.231229	0.0084904	22.4144	22.6006	22.3129	22.4144	22.44	22.6006	22.5846	22.6757
Q6P1B1	Xaa-Pro aminopeptidase 1	Xpnpep1	19	0.267124	0.00853384	22.0951	21.8034	22.0886	22.1426	22.0951	21.9459	21.7755	21.8034
Q8BYN5	FSD1-like protein	Fsd1l	1	0.685428	0.00859818	17.9488	17.4252	17.9141	18.3101	17.9488	17.4252	17.4496	17.2419
Q8C650	Septin-10	Septin10	1	0.619123	0.00866438	18.9882	18.4252	19.002	18.9054	18.9882	18.4252	18.5127	18.1002
Q9Z1Q5	Chloride intracellular channel protein 1	Clic1	7	0.249747	0.00873624	22.4972	22.2302	22.4726	22.5261	22.4972	22.2302	22.343	22.1734
Q99LB2	Dehydrogenase/reductase SDR family member 4	Dhrs4	15	-0.23922	0.0088447	23.8764	24.1174	23.9495	23.8764	23.7995	24.1174	24.0691	24.1565
Q91V16	Electron transfer flavoprotein regulatory factor 1	Etfrf1	4	-0.198847	0.00886685	22.5846	22.8014	22.6431	22.5846	22.5754	22.8614	22.8014	22.7369
Q5SW19	Clustered mitochondria protein homolog	Cluh	43	-0.146315	0.00892025	22.2679	22.4092	22.2273	22.2792	22.2678	22.4476	22.3565	22.4093
Q61133;Q99L20	Glutathione S-transferase theta-2	Gstt2;Gstt3	1	0.335494	0.00893865	18.8269	18.4415	18.8269	18.68	18.8817	18.4415	18.5318	18.4087
Q5KU39	Vacuolar protein sorting-associated protein 41 homolog	Vps41	3	2.87319	0.00897486	17.8667	15.4165	17.5049	19.0976	17.8666	14.5941	15.839	15.4165
O89116	Vesicle transport through interaction with t-SNAREs homolog 1A	Vti1a	2	0.673292	0.00899392	18.6096	17.805	18.3321	18.7106	18.6096	17.805	18.0479	17.7796
Q9D7X3	Dual specificity protein phosphatase 3	Dusp3	5	0.244565	0.00902463	22.2764	22.0122	22.1581	22.2764	22.3073	22.0393	22.0122	21.9566
Q8VDC1	FYVE and coiled-coil domain-containing protein 1	Fyco1	26	-0.282317	0.00903091	20.4874	20.7307	20.3538	20.5356	20.4874	20.7876	20.7056	20.7307
F8VPN4	Glycogen debranching enzyme	Agl	65	-0.210494	0.00910013	23.0805	23.3101	23.0426	23.0805	23.1441	23.3101	23.2375	23.3511
P56501	Mitochondrial uncoupling protein 3	Ucp3	10	-0.826019	0.00913177	21.3045	22.1206	21.3045	21.3805	21.2066	22.4144	21.8346	22.1206
P23953;Q8VCT4	Carboxylesterase 1C	Ces1c;Ces1d	3	-0.50709	0.00915181	23.417	24.0105	23.5638	23.3239	23.417	24.0105	24.0359	23.7796
Q61646	Haptoglobin	Hp	11	4.72767	0.00923087	21.5777	17.7119	21.0886	23.3239	21.5777	17.7119	15.8258	18.2696
P61358	60S ribosomal protein L27	Rpl27	6	0.207936	0.00923477	24.1565	23.9495	24.1488	24.1565	24.1719	23.9495	24.0275	23.8764
Q922Q1	Mitochondrial amidoxime reducing component 2	Mtarc2	11	0.319219	0.00926955	22.4196	22.1143	22.3857	22.4196	22.4349	21.9707	22.1143	22.1976
P83882	60S ribosomal protein L36a	Rpl36a	4	0.203396	0.00932524	21.5498	21.4015	21.5498	21.5498	21.6671	21.4066	21.4015	21.3484
Q9WV35	C->U-editing enzyme APOBEC-2	Apobec2	11	0.306019	0.00937138	24.5869	24.2607	24.5869	24.4862	24.6971	24.2607	24.3307	24.2607
D3YZZ5	Transmembrane p24-trafficking protein 7	Tmed7	4	0.290578	0.00939896	20.5638	20.3321	20.5451	20.654	20.5638	20.3321	20.3645	20.1946
O55137	Acyl-coenzyme A thioesterase 1	Acot1	4	-0.683993	0.00943573	19.0691	19.7257	19.0691	19.1332	18.8144	19.7257	19.4854	19.8576
Q9DBS2	Tumor protein p63-regulated gene 1-like protein	Tprg1l	3	0.985873	0.00944972	19.586	18.7373	19.8408	19.5713	19.586	18.7373	18.9798	18.3233
Q9ESE1	Lipopolysaccharide-responsive and beige-like anchor protein	Lrba	9	0.542645	0.00945233	18.9345	18.4576	19.1206	18.9344	18.7828	18.4576	18.4736	18.2787
Q6IRU5	Clathrin light chain B	Cltb	7	0.265324	0.00946142	22.4144	22.2006	22.4144	22.4701	22.3805	22.2125	22.2006	22.0559
P56376	Acylphosphatase-1	Acyp1	7	0.186164	0.00949296	22.2302	22.0592	22.2302	22.2332	22.1734	22.0592	21.9566	22.0625
P26040;P26041;P26043	Ezrin	Ezr;Msn;Rdx	10	0.226363	0.00949627	25.4202	25.1871	25.5105	25.4202	25.4041	25.1795	25.2891	25.1871
Q3UX10;Q9JJZ2	Tubulin alpha chain-like 3	Tuba8;Tubal3	1	-0.377384	0.00954614	21.0625	21.4324	20.9882	21.1886	21.0625	21.5638	21.4324	21.3752
Q9CPS6	Adenosine 5'-monophosphoramidase HINT3	Hint3	5	-0.178755	0.00955545	21.1946	21.3752	21.2477	21.1457	21.1946	21.3321	21.417	21.3752
Q922H4	Mannose-1-phosphate guanyltransferase alpha	Gmppa	3	-0.230723	0.00963891	19.0265	19.2855	19.0265	19.0479	18.9714	19.1581	19.2855	19.2945
Q8BH86	D-glutamate cyclase, mitochondrial	Dglucy	21	-0.27002	0.00966985	22.7735	23.0509	22.8073	22.7471	22.7735	22.9477	23.0509	23.1395
P17156	Heat shock-related 70 kDa protein 2	Hspa2	6	0.413534	0.00974952	20.9171	20.417	20.9459	20.8727	20.9171	20.4066	20.6714	20.417
Q8BGU5	Cyclin-Y	Ccny	4	0.392388	0.00983825	20.6364	20.2535	20.6886	20.5545	20.6364	20.2535	20.3538	20.0951
O89086	RNA-binding protein 3	Rbm3	5	0.638526	0.0100234	21.9951	21.4626	22.2535	21.9812	21.9951	21.2419	21.4626	21.6096
A2AQ25	Sickle tail protein	Skt	9	-0.197483	0.0100631	19.7422	19.9214	19.7123	19.7748	19.7422	19.9214	20.0156	19.8847
P84099	60S ribosomal protein L19	Rpl19	8	0.206766	0.0100913	23.5754	23.3645	23.4923	23.5754	23.632	23.3645	23.391	23.3239
O88712;P56546	C-terminal-binding protein 1	Ctbp1;Ctbp2	2	-0.214776	0.0101704	20.4972	20.6628	20.4972	20.5261	20.4375	20.6627	20.7796	20.6627
G5E8K5;Q8C8R3	Ankyrin-3	Ank2;Ank3	5	0.386707	0.0102102	22.3619	22.002	22.2273	22.3699	22.3619	21.7915	22.002	22.0054
Q6P069	Sorcin	Sri	7	0.268165	0.0102367	22.7533	22.4996	22.743	22.7955	22.7533	22.4996	22.5915	22.3962
Q9CZ42	ATP-dependent (S)-NAD(P)H-hydrate dehydratase	Naxd	10	-0.0972347	0.0103243	22.5404	22.6342	22.5498	22.5069	22.5404	22.5983	22.6342	22.6562
G5E895	Aldo-keto reductase family 1, member B10 (aldose reductase)	Akr1b10	7	0.0821006	0.0103276	23.5045	23.4298	23.5045	23.5045	23.5522	23.4298	23.4298	23.4551
P06151	L-lactate dehydrogenase A chain	Ldha	28	0.166677	0.010332	27.0609	26.9316	27.1015	27.0505	27.0608	26.9428	26.8385	26.9316
P62270	40S ribosomal protein S18	Rps18	10	0.150281	0.0103531	24.3307	24.1642	24.317	24.3307	24.3778	24.1642	24.2463	24.1642
Q9DCZ1	GMP reductase 1	Gmpr	10	0.268049	0.0103737	22.5869	22.3672	22.5846	22.5869	22.7035	22.2764	22.3672	22.4273
Q8C3B8	Protein RFT1 homolog	Rft1	1	0.95649	0.0104632	16.5173	15.4683	16.3321	16.5173	16.68	15.9076	15.4683	15.2841
Q8BSE0	Regulator of microtubule dynamics protein 2	Rmdn2	2	1.39279	0.0105097	19.0319	17.5049	18.9316	19.0319	19.1282	17.1946	18.2137	17.5049
P11881	Inositol 1,4,5-trisphosphate receptor type 1	Itpr1	7	0.296719	0.0106093	19.2832	18.963	19.3101	19.1801	19.2832	18.963	19.0506	18.8697
Q9JI90	E3 ubiquitin-protein ligase RNF14	Rnf14	7	0.647961	0.0108092	20.1946	19.5223	20.3321	20.1946	20.002	19.7173	19.3452	19.5223
P17918	Proliferating cell nuclear antigen	Pcna	4	-0.725103	0.0108543	19.002	19.7307	18.9024	19.002	19.343	19.7039	19.9882	19.7307
Q99MS7	EH domain-binding protein 1-like protein 1	Ehbp1l1	32	0.367931	0.0109016	20.8576	20.4576	20.8576	20.9601	20.6971	20.4273	20.5261	20.4576
Q9D024	PAT complex subunit CCDC47	Ccdc47	10	-0.225567	0.0109017	20.1704	20.343	20.1703	20.0821	20.1825	20.343	20.4476	20.3211
Q9D1D4	Transmembrane emp24 domain-containing protein 10	Tmed10	7	0.227822	0.0109879	22.7756	22.5189	22.6928	22.8269	22.7755	22.4923	22.6006	22.5189
O88662	Epithelial membrane protein 2	Emp2	2	0.296296	0.0110618	18.7504	18.417	18.7504	18.7667	18.6766	18.417	18.547	18.3408
Q7TT45	Ras-related GTP-binding protein D	Rragd	1	1.36331	0.0111037	18.5842	16.92	18.6132	18.3709	18.5842	16.8113	17.7471	16.92
Q9CQU3	Protein RER1	Rer1	2	0.208473	0.0112943	21.8346	21.5685	21.7389	21.8423	21.8346	21.5592	21.6627	21.5685
Q9R0X4	Acyl-coenzyme A thioesterase 9, mitochondrial	Acot9	23	0.405977	0.0113029	23.1015	22.6186	23.119	23.1015	22.9951	22.8269	22.6186	22.5522
Q9CXT7	Transmembrane protein 192	Tmem192	2	0.926985	0.0113169	18.4046	17.6869	18.4046	18.3056	18.624	17.7207	17.6869	17.1457
Q9EQQ9	Protein O-GlcNAcase	Oga	9	0.359952	0.011325	20.1704	19.7307	20.0426	20.1703	20.2066	19.7022	19.9068	19.7307
P28271;Q811J3	Cytoplasmic aconitate hydratase	Aco1;Ireb2	1	0.123967	0.0113793	22.1825	22.0325	22.1825	22.1079	22.1856	22.0156	22.0326	22.0559
Q78PG9	Coiled-coil domain-containing protein 25	Ccdc25	3	-0.427456	0.0114925	18.5432	18.9798	18.6697	18.4576	18.5432	18.9798	19.1155	18.8576
P99027	60S acidic ribosomal protein P2	Rplp2	5	0.259521	0.0116005	23.3778	23.1946	23.3778	23.3778	23.5045	23.0789	23.1946	23.2081
P50462	Cysteine and glycine-rich protein 3	Csrp3	13	0.453257	0.0116277	25.1681	24.6757	25.1681	25.2821	25.1095	24.6153	24.6757	24.9089
P45591	Cofilin-2	Cfl2	10	0.22273	0.0117202	24.7645	24.5404	24.7645	24.8044	24.6595	24.4676	24.5522	24.5404
O55106	Striatin	Strn	7	0.63681	0.0117798	20.4375	19.8621	20.4375	20.6364	20.265	19.8621	19.6204	19.9459
Q8C8R3	Ankyrin-2	Ank2	36	0.246132	0.0117947	23.0935	22.867	23.0592	23.0935	23.1673	22.7776	22.937	22.867
Q9Z1K5	E3 ubiquitin-protein ligase ARIH1	Arih1	4	0.330238	0.0118264	19.9068	19.6114	19.9742	19.8636	19.9068	19.4556	19.6114	19.6869
P29758	Ornithine aminotransferase, mitochondrial	Oat	18	-0.157682	0.0118284	24.0772	24.239	24.019	24.1174	24.0772	24.1871	24.239	24.2607
Q9CQE3	28S ribosomal protein S17, mitochondrial	Mrps17	1	0.09655	0.0118753	21.7553	21.6497	21.7553	21.7056	21.7553	21.6627	21.6141	21.6497
Q9D7J4	Cytochrome c oxidase assembly protein COX20, mitochondrial	Cox20	3	-0.360266	0.011908	21.5165	21.8576	21.4273	21.5165	21.5915	21.8576	21.7634	21.9951
P04247	Myoglobin	Mb	24	-0.201035	0.0119145	29.2216	29.4032	29.249	29.2216	29.109	29.362	29.4174	29.4032
Q99PT1	Rho GDP-dissociation inhibitor 1	Arhgdia	10	0.214505	0.0119755	25.792	25.5463	25.792	25.824	25.792	25.5344	25.6838	25.5463
P08752;P18872;Q6R0H7;Q9DC51	Guanine nucleotide-binding protein G(i) subunit alpha-2	Gnai2;Gnai3;Gnao1;Gnas	1	0.145341	0.0121318	24.8764	24.7286	24.8764	24.8142	24.9043	24.7286	24.7492	24.6811
Q8VEE1	LIM and cysteine-rich domains protein 1	Lmcd1	7	0.297805	0.0121415	21.1206	20.895	21.1206	21.2877	21.1079	20.8034	20.895	20.9243
P53702	Holocytochrome c-type synthase	Hccs	14	-0.217516	0.0121959	22.6209	22.8073	22.5568	22.6209	22.6606	22.8073	22.7755	22.9079
Q99KQ4	Nicotinamide phosphoribosyltransferase	Nampt	23	-0.461627	0.0122764	23.3101	23.8093	23.4298	23.3101	23.1534	23.8481	23.8093	23.6209
Q9JMH9	Unconventional myosin-XVIIIa	Myo18a	48	0.172077	0.0122783	21.5309	21.3211	21.4375	21.5545	21.5309	21.3156	21.3699	21.3211
Q99P31	Hsp70-binding protein 1	Hspbp1	5	-0.206582	0.0123089	19.8128	20.0559	19.786	19.8128	19.9214	20.002	20.0821	20.0559
Q8BHG1	Nardilysin	Nrdc	7	-0.293937	0.0123114	20.1332	20.4067	20.1703	20.1332	20.1079	20.3321	20.4066	20.5545
Q8BYK4	Retinol dehydrogenase 12	Rdh12	1	0.151121	0.0123154	21.2477	21.0625	21.2477	21.1642	21.2477	21.0359	21.1079	21.0625
Q9DCT8	Cysteine-rich protein 2	Crip2	9	-0.225657	0.0123654	25.0894	25.3239	25.0894	25.0894	25.1908	25.2961	25.3239	25.4266
Q8R146	Acylamino-acid-releasing enzyme	Apeh	18	-0.143332	0.0123872	21.6186	21.7796	21.6186	21.6006	21.6928	21.7796	21.8113	21.7512
P10126	Elongation factor 1-alpha 1	Eef1a1	14	0.525232	0.0124357	24.7796	24.2961	24.7796	24.7594	24.9584	24.2961	24.4923	24.1332
P68181	cAMP-dependent protein kinase catalytic subunit beta	Prkacb	5	0.281249	0.012473	21.8876	21.6364	21.9024	21.8876	21.8385	21.6757	21.6364	21.4726
P11152	Lipoprotein lipase	Lpl	10	-0.635028	0.0125039	22.3017	22.8365	22.4273	22.0658	22.3017	22.7634	22.8365	23.0999
Q9R0P5	Destrin	Dstn	7	0.259151	0.0125329	24.5812	24.3778	24.5344	24.5812	24.6703	24.2463	24.3844	24.3778
Q60809	CCR4-NOT transcription complex subunit 7	Cnot7	1	-1.1862	0.0125606	16.5672	17.6593	16.7207	16.5672	16.4399	18.2604	17.3667	17.6593
P05201	Aspartate aminotransferase, cytoplasmic	Got1	30	-0.227624	0.0125672	27.4785	27.6998	27.4785	27.4473	27.4785	27.6998	27.604	27.7833
Q9EST1	Gasdermin-A	Gsdma	3	-2.38544	0.0126031	17.4334	19.5842	17.8545	17.4334	16.0512	19.6168	19.2945	19.5842
Q3URD3	Sarcolemmal membrane-associated protein	Slmap	27	0.674733	0.012606	23.9225	23.1991	23.9225	24.0854	23.7389	23.0559	23.4676	23.1991
Q8VHX6	Filamin-C	Flnc	103	0.400447	0.0126104	25.0732	24.7492	25.0732	25.1984	24.9847	24.7594	24.7492	24.5463
Q9Z1G3	V-type proton ATPase subunit C 1	Atp6v1c1	8	0.200815	0.0126444	20.1946	20.0292	20.3101	20.1946	20.1581	20.0292	20.002	20.0292
Q8R361	Rab11 family-interacting protein 5	Rab11fip5	19	0.387189	0.0126655	21.3211	20.9951	21.265	21.3699	21.3211	21.0359	20.9951	20.7634
P57776	Elongation factor 1-delta	Eef1d	10	0.146893	0.0127042	23.9316	23.7695	23.867	23.9316	23.9495	23.7695	23.8093	23.7286
Q8VCA6	Transmembrane protein 161A	Tmem161a	1	-0.959063	0.0127127	19.2466	20.0951	18.9964	19.3167	19.2466	20.5165	19.8253	20.0951
P13541;P13542;Q91Z83	Myosin-3	Myh3;Myh7;Myh8	1	3.19242	0.0127784	20.4067	17.0847	20.6453	20.4066	19.3452	17.0847	17.9488	15.7863
Q80X90;Q8BTM8;Q8VHX6	Filamin-B	Flna;Flnb;Flnc	5	0.253164	0.0128728	24.3511	24.1095	24.3511	24.3511	24.275	24.1095	24.141	23.9672
Q9R0Q6	Actin-related protein 2/3 complex subunit 1A	Arpc1a	12	0.242189	0.0129179	22.3778	22.1238	22.3778	22.3857	22.3592	22.0393	22.2332	22.1238
Q9WV91	Prostaglandin F2 receptor negative regulator	Ptgfrn	9	0.305676	0.0129274	20.5069	20.1457	20.4775	20.5069	20.5545	20.1457	20.343	20.1332
P61082	NEDD8-conjugating enzyme Ubc12	Ube2m	9	0.119935	0.0130186	22.6714	22.5189	22.6096	22.6714	22.6779	22.5685	22.5189	22.5117
Q80X95	Ras-related GTP-binding protein A	Rraga	5	0.218095	0.0130753	20.7471	20.5069	20.714	20.7471	20.7471	20.6096	20.4375	20.5069
Q8BIL5	Protein Hook homolog 1	Hook1	2	-0.520493	0.0131132	15.6762	16.2156	15.8582	15.6745	15.6762	16.2156	16.4576	16.0971
Q99P72	Reticulon-4	Rtn4	21	0.589221	0.0132103	21.9742	21.3045	21.9742	22.1143	21.8307	21.2419	21.6051	21.3045
E9PYF4	LIM domain only 7	Lmo7	46	0.280931	0.0132781	22.2707	22.0122	22.2707	22.2125	22.2989	21.8614	22.0658	22.0122
O88322	Nidogen-2	Nid2	28	0.165159	0.0133074	22.3017	22.1174	22.2332	22.3017	22.3045	22.0592	22.1174	22.1673
Q99KX1	Myeloid leukemia factor 2	Mlf2	5	-0.266048	0.0133471	20.3645	20.5638	20.3962	20.265	20.3645	20.7056	20.5638	20.5545
P20029	Endoplasmic reticulum chaperone BiP	Hspa5	38	-0.214701	0.0133596	24.8717	25.1095	24.8576	24.8717	24.989	25.0772	25.1757	25.1095
P10853;Q64478;Q64524;Q6ZWY9	Histone H2B type 1-F/J/L	H2bc15;H2bc21;H2bc8;H2bc9	10	0.281621	0.0134693	28.3153	28.0557	28.4823	28.2847	28.3153	28.0505	28.1312	28.0557
Q9CWF2	Tubulin beta-2B chain	Tubb2b	1	0.561895	0.0134819	19.7056	19.0925	19.5508	19.7056	19.8113	18.9573	19.3321	19.0925
P70695	Fructose-1,6-bisphosphatase isozyme 2	Fbp2	9	-0.508709	0.0134991	22.1174	22.6562	22.2477	21.9601	22.1174	22.6562	22.4501	22.7451
Q9CR76	Transmembrane protein 186	Tmem186	7	-0.0977224	0.0136828	21.7594	21.8423	21.7836	21.7098	21.7594	21.8651	21.8385	21.8423
Q8QZR5	Alanine aminotransferase 1	Gpt	10	-0.501388	0.013693	21.7955	22.3936	21.7955	21.7512	21.9777	22.3936	22.155	22.48
P62843	40S ribosomal protein S15	Rps15	6	0.15708	0.0137073	21.8727	21.714	21.8113	21.8727	21.9243	21.714	21.743	21.68
Q9Z176	Serine/threonine-protein phosphatase 2A regulatory subunit B'' subunit delta	Ppp2r3d	6	0.446585	0.0137167	20.8802	20.3752	21.0359	20.7471	20.8802	20.3752	20.3752	20.5731
Q9D8Y0	EF-hand domain-containing protein D2	Efhd2	11	0.791438	0.0137538	22.4375	21.7955	22.4375	22.5615	22.3962	21.9098	21.7955	21.3156
D3Z4I3;Q62176	RNA-binding protein 24	Rbm24;Rbm38	3	0.177188	0.0138243	21.632	21.4825	21.6757	21.6186	21.632	21.391	21.4825	21.5213
Q8C1A5	Thimet oligopeptidase	Thop1	15	0.207279	0.0138969	21.3045	21.1581	21.3699	21.3045	21.2989	21.0292	21.1642	21.1581
Q9Z131	SH3 domain-binding protein 5	Sh3bp5	1	0.480364	0.0139003	21.0625	20.5915	21.1015	21.0625	20.9024	20.3538	20.68	20.5915
P41216	Long-chain-fatty-acid--CoA ligase 1	Acsl1	43	-0.232782	0.0139028	27.6181	27.8741	27.6251	27.6181	27.5682	27.9031	27.7325	27.8741
P62748	Hippocalcin-like protein 1	Hpcal1	4	0.424466	0.0139747	20.0951	19.6988	20.0821	20.0951	20.2764	19.6042	19.8772	19.6988
O35459	Delta(3,5)-Delta(2,4)-dienoyl-CoA isomerase, mitochondrial	Ech1	22	-0.422704	0.0139806	25.4488	25.9088	25.3612	25.5105	25.4488	25.9089	25.6865	25.9933
Q60865	Caprin-1	Caprin1	11	-0.12885	0.0140333	21.2361	21.3484	21.2419	21.2006	21.2361	21.3484	21.4066	21.3101
P16627;P17156;P63017	Heat shock 70 kDa protein 1-like	Hspa1l;Hspa2;Hspa8	3	0.105124	0.0140551	26.5551	26.4362	26.5551	26.5105	26.5898	26.4362	26.4362	26.4676
P97789	5'-3' exoribonuclease 1	Xrn1	3	0.770508	0.0140595	16.8238	16.0511	16.9658	16.7072	16.8238	16.0511	16.3598	15.7743
P42859	Huntingtin	Htt	3	1.57572	0.0141457	17.8965	16.582	18.7667	17.8965	17.8175	16.582	16.977	16.1946
Q3U0B3	Dehydrogenase/reductase SDR family member 11	Dhrs11	9	-0.300591	0.0141752	21.7182	21.9495	21.7182	21.6453	21.7594	21.9495	21.9388	22.1363
P41241	Tyrosine-protein kinase CSK	Csk	4	0.325985	0.0142709	18.8636	18.5915	18.9402	18.8454	18.8636	18.6627	18.5915	18.417
A2AGL3;E9PZQ0;E9Q401	Ryanodine receptor 3	Ryr1;Ryr2;Ryr3	5	-0.223279	0.0142774	22.1642	22.4324	22.2792	22.1642	22.1332	22.3565	22.4576	22.4324
Q8C3X8	Lipase maturation factor 2	Lmf2	5	0.555794	0.014334	20.1457	19.5694	20.1457	19.9601	20.3211	19.4496	19.7406	19.5694
Q61598	Rab GDP dissociation inhibitor beta	Gdi2	21	0.10548	0.0144817	24.1871	24.0691	24.1332	24.1871	24.1946	24.0691	24.0935	24.0359
P63073	Eukaryotic translation initiation factor 4E	Eif4e	7	0.184319	0.0144999	21.1395	20.9024	21.1395	21.1581	21.0691	20.9024	21.0088	20.9024
Q8BYM8	Probable cysteine--tRNA ligase, mitochondrial	Cars2	17	-0.202722	0.0145341	21.2535	21.4067	21.2593	21.2535	21.1581	21.3752	21.4972	21.4066
Q9R059	Four and a half LIM domains protein 3	Fhl3	3	0.468046	0.0145966	20.5823	20.1079	20.5823	20.5165	20.6364	19.9243	20.1079	20.2989
E9Q6R7	Utrophin	Utrn	53	0.340225	0.0146708	20.2302	19.8253	20.2302	20.1825	20.265	19.8253	20.0426	19.7891
Q3U186	Probable arginine--tRNA ligase, mitochondrial	Rars2	16	0.213512	0.0147082	20.4476	20.2066	20.417	20.4972	20.4476	20.3321	20.1825	20.2066
P01887	Beta-2-microglobulin	B2m	2	0.449404	0.0147636	20.1079	19.6132	19.8207	20.1079	20.1332	19.4835	19.6168	19.6132
Q9WVT6	Carbonic anhydrase 14	Ca14	3	-0.628464	0.0147847	19.7422	20.2989	19.7422	19.5165	19.9301	20.5451	20.2302	20.2989
Q61576;Q9Z247	Peptidyl-prolyl cis-trans isomerase FKBP10	Fkbp10;Fkbp9	1	-0.779999	0.01481	17.417	18.1994	17.805	17.417	17.2696	18.1507	18.4815	18.1994
P54728	UV excision repair protein RAD23 homolog B	Rad23b	8	0.198015	0.0148253	21.85	21.6929	21.8499	21.8307	21.9742	21.654	21.6928	21.714
Q80XL6	Acyl-CoA dehydrogenase family member 11	Acad11	25	-0.598151	0.0148578	21.2477	22.0054	21.2477	21.2302	21.4375	22.0592	21.6453	22.0054
P55258	Ras-related protein Rab-8A	Rab8a	6	0.409871	0.015172	21.1946	20.8727	21.1946	21.2933	21.1206	20.8876	20.8727	20.6186
Q9JLF6	Protein-glutamine gamma-glutamyltransferase K	Tgm1	3	-2.7828	0.0151974	16.3806	18.5657	16.6937	16.3806	15.8763	18.5657	18.3581	20.3752
Q9CR57	60S ribosomal protein L14	Rpl14	4	0.26678	0.0152637	24.989	24.6865	24.989	24.9043	25.0732	24.6703	24.8093	24.6865
P22892	AP-1 complex subunit gamma-1	Ap1g1	12	0.253117	0.015413	21.0359	20.7955	20.9316	21.0359	21.0951	20.7955	20.8191	20.6886
O35215	D-dopachrome decarboxylase	Ddt	10	-0.253284	0.0154975	23.7995	24.0359	23.6971	23.7995	23.8385	23.9495	24.0359	24.1095
Q60739	BAG family molecular chaperone regulator 1	Bag1	5	0.65634	0.0155602	19.8438	19.2185	19.8097	19.8438	20.0156	18.9826	19.2185	19.4991
P70699	Lysosomal alpha-glucosidase	Gaa	5	-0.0969429	0.0156683	20.3962	20.5165	20.3857	20.4375	20.3962	20.5165	20.4676	20.5261
Q8BMP6	Golgi resident protein GCP60	Acbd3	11	0.361489	0.0157582	20.3101	19.9083	20.3857	20.3101	20.2877	19.8576	20.1332	19.9083
P57780	Alpha-actinin-4	Actn4	36	0.236602	0.0158001	23.1395	22.8708	23.1079	23.1395	23.1931	22.8708	23.0156	22.8442
P06745	Glucose-6-phosphate isomerase	Gpi	35	0.0901998	0.0158657	26.2838	26.1908	26.2838	26.2926	26.2732	26.2317	26.1565	26.1908
P58404	Striatin-4	Strn4	4	0.26908	0.0159219	19.3624	19.1332	19.3624	19.3145	19.4025	19.1332	18.9686	19.1703
P84084	ADP-ribosylation factor 5	Arf5	5	0.260739	0.0160211	24.3578	24.0526	24.2821	24.3578	24.417	24.0275	24.1946	24.0526
Q99MK8	Beta-adrenergic receptor kinase 1	Grk2	1	-0.633156	0.0160411	16.9545	17.6662	16.8238	17.2042	16.9545	17.7987	17.6662	17.417
P28867	Protein kinase C delta type	Prkcd	2	1.05945	0.016084	19.0847	17.8175	18.5582	19.0899	19.0847	17.8175	18.209	17.528
Q9R062	Glycogenin-1	Gyg1	9	0.195021	0.016095	23.7594	23.5165	23.7594	23.7594	23.7182	23.6431	23.4923	23.5165
P51125	Calpastatin	Cast	23	0.199843	0.0161119	21.9459	21.7756	22.0224	21.9459	21.8987	21.7755	21.8034	21.6886
Q8BGQ7	Alanine--tRNA ligase, cytoplasmic	Aars1	20	0.389734	0.0162192	20.8269	20.4676	20.8269	20.7223	20.9742	20.4676	20.5545	20.3321
Q91V12	Cytosolic acyl coenzyme A thioester hydrolase	Acot7	10	0.163771	0.0162793	24.0854	23.9406	24.1565	24.0691	24.0854	23.9933	23.9406	23.8858
Q8K2V1	Serine/threonine-protein phosphatase 4 regulatory subunit 1	Ppp4r1	2	1.75302	0.0164536	17.3408	15.1813	17.3408	16.1908	17.5508	15.5224	15.1196	15.1813
P62301	40S ribosomal protein S13	Rps13	8	0.176589	0.0165334	24.2679	24.0935	24.2678	24.2607	24.3101	24.0935	24.1795	24.0359
Q61151;Q6PD03	Serine/threonine-protein phosphatase 2A 56 kDa regulatory subunit epsilon isoform	Ppp2r5a;Ppp2r5e	1	0.172748	0.0166842	21.3962	21.265	21.4825	21.3752	21.3962	21.1886	21.2821	21.265
O88746	Target of Myb protein 1	Tom1	15	0.257768	0.0168284	21.823	21.5961	21.8461	21.823	21.7512	21.6186	21.5961	21.4324
Q99PP2	Zinc finger protein 318	Znf318	1	-0.603311	0.0168916	19.3878	19.8712	19.0265	19.4716	19.3879	19.8712	19.7955	20.0292
Q9CZ28	Vacuolar-sorting protein SNF8	Snf8	3	0.204245	0.016973	20.7223	20.4775	20.7307	20.7223	20.6096	20.4273	20.4775	20.5451
P62264	40S ribosomal protein S14	Rps14	5	0.137561	0.017022	23.3101	23.1961	23.2961	23.3101	23.3645	23.1961	23.2288	23.1332
P63101;P68254;Q9CQV8	14-3-3 protein zeta/delta	Ywhab;Ywhaq;Ywhaz	3	0.143876	0.0170372	23.2185	23.0805	23.1642	23.2346	23.2185	23.0805	23.1015	23.0037
P06728	Apolipoprotein A-IV	Apoa4	19	-0.226534	0.017048	21.5117	21.7056	21.5117	21.5777	21.4874	21.8538	21.7056	21.6971
Q8BHL8	Proteasome inhibitor PI31 subunit	Psmf1	3	-0.647633	0.0171156	18.4972	19.1482	18.8144	18.2877	18.4972	19.0951	19.1482	19.2989
Q3UHD2	Glucose-fructose oxidoreductase domain-containing protein 1	Gfod1	3	0.298016	0.0174471	20.3321	20.0951	20.3321	20.3101	20.3752	20.0951	19.895	20.1332
P68369	Tubulin alpha-1A chain	Tuba1a	5	0.293798	0.0176253	26.6865	26.4409	26.6865	26.673	26.7129	26.441	26.4984	26.2517
Q91ZA3	Propionyl-CoA carboxylase alpha chain, mitochondrial	Pcca	40	-0.135949	0.0177021	24.7895	24.918	24.7995	24.7895	24.7594	24.976	24.8623	24.918
P35564	Calnexin	Canx	27	-0.191891	0.017822	23.9584	24.1871	23.9584	24.019	23.9584	24.1871	24.239	24.0854
Q80X90;Q8VHX6	Filamin-B	Flnb;Flnc	4	0.628725	0.0179338	22.6164	22.1332	22.6164	22.6886	22.6006	21.6886	22.1332	22.1976
Q9DBL1	Short/branched chain specific acyl-CoA dehydrogenase, mitochondrial	Acadsb	16	-0.0966263	0.0179496	23.4041	23.5045	23.4425	23.3645	23.4041	23.5045	23.48	23.5165
P46938	Transcriptional coactivator YAP1	Yap1	2	0.64569	0.0182132	18.9714	18.3794	18.7987	18.9714	19.3056	18.3794	18.2466	18.5127
P18242	Cathepsin D	Ctsd	11	-0.289049	0.0182363	24.5225	24.7645	24.5344	24.5225	24.317	24.7796	24.7645	24.6971
P68433;P84228	Histone H3.1	H3c11;H3c15	1	1.02236	0.0183406	20.8269	19.8817	20.8269	20.7796	20.8269	19.29	19.8817	20.1946
Q9D0D3	Poly(A) RNA polymerase, mitochondrial	Mtpap	7	-0.17131	0.0183477	20.343	20.5451	20.3211	20.417	20.343	20.5451	20.5823	20.4676
P48999	Polyunsaturated fatty acid 5-lipoxygenase	Alox5	2	-0.838116	0.0183546	18.0211	19.0925	17.9714	18.0211	18.5842	19.1531	18.8454	19.0925
Q8R010	Aminoacyl tRNA synthase complex-interacting multifunctional protein 2	Aimp2	6	-0.90171	0.0184177	21.3101	22.0325	20.7955	21.3101	21.5117	21.9882	22.3017	22.0326
Q8BFZ1	Trans-2,3-enoyl-CoA reductase-like	Tecrl	9	-0.122125	0.0186233	22.3752	22.4874	22.3376	22.3752	22.3962	22.4476	22.4874	22.5404
Q99LI8	Hepatocyte growth factor-regulated tyrosine kinase substrate	Hgs	5	0.304007	0.0187901	20.2877	20.002	20.2764	20.2877	20.417	20.1457	20.002	19.9214
Q9CZW5	Mitochondrial import receptor subunit TOM70	Tomm70	17	0.128604	0.0189214	22.6822	22.538	22.6822	22.7307	22.6584	22.6141	22.538	22.5333
P14824	Annexin A6	Anxa6	50	0.112999	0.0189564	26.143	26.0588	26.1795	26.143	26.1312	25.9869	26.0691	26.0588
Q91ZU6;Q9QXZ0	Dystonin	Dst;Macf1	4	-0.29892	0.0190052	20.1704	20.5165	20.1825	20.1703	20.1703	20.5165	20.3211	20.5823
E9Q411	Neuroblastoma-amplified sequence	Nbas	6	0.266542	0.0190925	19.5069	19.2232	19.5069	19.5564	19.3603	19.1357	19.265	19.2232
Q8K3H0	DCC-interacting protein 13-alpha	Appl1	14	0.169769	0.0191351	20.8346	20.6628	20.8346	20.9098	20.8113	20.6627	20.7471	20.6364
Q9DBR4	Amyloid beta precursor protein binding family B member 2	Apbb2	1	1.58884	0.0191355	17.1357	15.5981	16.8238	17.1357	17.2967	15.5981	16.1236	14.768
Q60931	Voltage-dependent anion-selective channel protein 3	Vdac3	15	-0.0887337	0.0192802	26.6458	26.7389	26.632	26.6458	26.6458	26.7645	26.6865	26.7389
O88668	Protein CREG1	Creg1	2	-0.885537	0.019319	20.1946	20.953	19.5823	20.1946	20.3101	20.9951	20.9531	20.7955
E9Q236	ATP-binding cassette sub-family C member 4	Abcc4	5	-0.447457	0.0194838	18.8238	19.3012	18.6488	18.8238	18.8606	19.3452	19.3012	19.0292
Q3TIX9	U4/U6.U5 tri-snRNP-associated protein 2	Usp39	3	0.522571	0.0194897	19.2696	18.7731	19.4129	19.0743	19.2696	18.5432	18.8727	18.7731
P35821	Tyrosine-protein phosphatase non-receptor type 1	Ptpn1	6	0.494344	0.019534	19.4933	18.9965	19.4933	19.4636	19.7157	18.9258	19.2673	18.9964
O70439	Syntaxin-7	Stx7	5	0.316715	0.0195515	21.4972	21.1269	21.4676	21.5309	21.4972	21.0756	21.343	21.1269
O55028	[3-methyl-2-oxobutanoate dehydrogenase [lipoamide]] kinase, mitochondrial	Bckdk	7	-0.180938	0.0195698	20.7796	20.9882	20.7471	20.8576	20.7796	21.0292	20.9882	20.9098
Q9Z1K6	E3 ubiquitin-protein ligase ARIH2	Arih2	3	0.317537	0.0196329	19.8832	19.5318	19.8832	19.692	19.9024	19.4108	19.5318	19.5823
Q9CQI7	U2 small nuclear ribonucleoprotein B''	Snrpb2	3	-0.70952	0.0197755	17.1053	17.8361	17.1357	17.1053	16.786	17.9024	17.8361	17.417
Q9WV55	Vesicle-associated membrane protein-associated protein A	Vapa	13	0.169374	0.0197869	23.4298	23.2679	23.391	23.4676	23.4298	23.2678	23.3239	23.1886
Q8CH40	Nucleoside diphosphate-linked moiety X motif 6	Nudt6	6	-0.270633	0.0198996	21.1642	21.4221	21.0292	21.2707	21.1642	21.4576	21.3962	21.4221
O35382	Exocyst complex component 4	Exoc4	11	0.331552	0.0200064	18.6096	18.3495	18.606	18.6903	18.6096	18.4211	18.3495	18.1407
Q9QZD9	Eukaryotic translation initiation factor 3 subunit I	Eif3i	10	0.115453	0.020038	20.4476	20.3321	20.3962	20.4476	20.4874	20.2989	20.3321	20.3538
O70251	Elongation factor 1-beta	Eef1b	6	0.237254	0.0200398	23.2821	23.074	23.2096	23.2821	23.3778	22.9742	23.1095	23.074
Q6PIE5	Sodium/potassium-transporting ATPase subunit alpha-2	Atp1a2	27	0.381706	0.0201603	24.019	23.7492	24.1946	23.9584	24.019	23.5285	23.7492	23.7492
Q9WVD5	Mitochondrial ornithine transporter 1	Slc25a15	8	-0.378672	0.0202268	19.9459	20.2764	19.6783	19.9459	19.9742	20.2877	20.2764	20.1703
Q8CBW3	Abl interactor 1	Abi1	5	0.226182	0.0202487	20.1457	19.8876	20.1457	20.1079	20.1825	20.0292	19.8876	19.8408
Q9EP69	Phosphatidylinositol-3-phosphatase SAC1	Sacm1l	24	0.262622	0.0202877	22.6518	22.4576	22.6518	22.7553	22.6074	22.4576	22.4701	22.2989
P43277	Histone H1.3	H1-3	1	0.631421	0.020309	20.5823	20.0559	20.6714	20.5823	20.4874	20.1581	20.0559	19.6329
Q9CQG1	Putative glutathione-specific gamma-glutamylcyclotransferase 2	Chac2	1	-1.55781	0.0203442	16.472	17.9714	16.977	15.5881	16.472	18.0319	17.9714	17.7072
P24527	Leukotriene A-4 hydrolase	Lta4h	29	0.311465	0.020428	22.9847	22.7182	22.9847	23.0608	22.8895	22.7492	22.7182	22.5333
Q8R502	Volume-regulated anion channel subunit LRRC8C	Lrrc8c	6	-0.514944	0.020564	18.6628	19.0899	18.83	18.6627	18.4252	19.0899	19.3012	19.0717
Q9Z210	Peroxisomal membrane protein 11B	Pex11b	6	-0.272898	0.0206291	18.7073	19.0769	18.7039	18.7072	18.8113	19.0795	18.8847	19.0769
Q9JIQ3	Diablo IAP-binding mitochondrial protein	Diablo	6	0.868354	0.0206831	21.4015	20.6453	21.4015	21.2593	21.8385	20.3538	20.6453	20.895
P50431;Q9CZN7	Serine hydroxymethyltransferase, cytosolic	Shmt1;Shmt2	1	-0.0776221	0.0206838	22.3129	22.4144	22.3129	22.3321	22.3101	22.417	22.3565	22.4144
Q3B7Z2	Oxysterol-binding protein 1	Osbp	26	0.130047	0.0207286	22.0723	21.9707	22.1111	22.0724	22.0393	21.8876	21.9742	21.9707
Q99JI4	26S proteasome non-ATPase regulatory subunit 6	Psmd6	25	0.0961189	0.0208492	22.4849	22.4015	22.4996	22.4651	22.4849	22.4196	22.4015	22.3403
Q3UFK8	FERM domain-containing protein 8	Frmd8	2	0.391453	0.0209769	17.8965	17.5127	17.8847	17.8965	18.0102	17.3836	17.7207	17.5127
P84096	Rho-related GTP-binding protein RhoG	Rhog	4	0.352048	0.0209855	20.5731	20.2185	20.4972	20.7634	20.5731	20.2185	20.3645	20.1946
P61922	4-aminobutyrate aminotransferase, mitochondrial	Abat	13	1.09301	0.0210224	21.1581	20.1206	20.9601	21.1581	21.2006	19.4716	20.4476	20.1206
Q9JM76	Actin-related protein 2/3 complex subunit 3	Arpc3	8	0.231322	0.0210757	23.0658	22.8113	23.0658	22.9654	23.0854	22.7182	22.8932	22.8113
Q91V01	Lysophospholipid acyltransferase 5	Lpcat3	5	0.494012	0.0210913	21.5777	20.9459	21.5869	21.5777	21.3645	20.9459	21.2361	20.8651
Q9ERU3	Zinc finger protein 22	Znf22	4	0.258148	0.0210932	18.392	18.0795	18.265	18.3962	18.3921	18.0795	18.1946	18.0047
Q02053	Ubiquitin-like modifier-activating enzyme 1	Uba1	43	0.0998224	0.02114	24.6918	24.5754	24.654	24.6918	24.7077	24.5754	24.6264	24.5522
E9Q6P5	Tetratricopeptide repeat protein 7B	Ttc7b	10	0.271691	0.0211617	20.0156	19.6731	20.0292	20.002	20.0156	19.6731	19.8906	19.668
Q8BH95	Enoyl-CoA hydratase, mitochondrial	Echs1	21	-0.133913	0.0211651	26.8974	27.0711	26.976	26.8858	26.8973	27.0711	27.0084	27.0813
Q9D1R9	60S ribosomal protein L34	Rpl34	5	0.151848	0.0212213	22.9477	22.8288	22.9795	22.9316	22.9477	22.8288	22.8499	22.7244
P15532	Nucleoside diphosphate kinase A	Nme1	6	0.330435	0.0213138	22.6342	22.3645	22.5568	22.7836	22.6342	22.4093	22.3645	22.2096
O08759	Ubiquitin-protein ligase E3A	Ube3a	19	0.173609	0.0214935	21.3484	21.2185	21.4015	21.3211	21.3484	21.1015	21.2302	21.2185
Q8BGY7	Protein FAM210A	Fam210a	9	-0.205505	0.0215124	22.7796	22.9672	22.7796	22.7161	22.867	22.9672	22.9495	23.0625
E9PYK3	Protein mono-ADP-ribosyltransferase PARP4	Parp4	4	0.610668	0.021532	19.2989	18.7892	19.5413	19.1002	19.2989	18.7891	18.4894	18.83
Q922E6	FAST kinase domain-containing protein 2, mitochondrial	Fastkd2	7	-0.243987	0.0216255	19.8515	20.1704	19.8238	20.0156	19.8515	20.1703	20.0821	20.1703
P70318	Nucleolysin TIAR	Tial1	4	0.863934	0.0219583	21.1946	20.4775	20.9459	21.3321	21.1946	20.4775	20.5261	19.8772
Q9D1A2	Cytosolic non-specific dipeptidase	Cndp2	16	0.15098	0.0220635	22.2066	22.0625	22.2006	22.2066	22.2066	22.0625	22.1206	21.9777
O88667	GTP-binding protein RAD	Rrad	6	0.236221	0.0221079	22.1269	21.8651	22.1395	21.9847	22.1269	21.8651	21.9098	21.7675
Q9D967	Magnesium-dependent phosphatase 1	Mdp1	6	0.338076	0.0221275	23.1111	22.68	22.8987	23.1269	23.1111	22.68	22.6253	22.8171
P08032;P16546	Spectrin alpha chain, erythrocytic 1	Spta1;Sptan1	1	0.105137	0.0222737	23.9316	23.8385	23.9316	23.9316	23.976	23.8385	23.8858	23.7995
A0A140T8M1	Immunoglobulin kappa variable 10-96 (Fragment)	Igkv10-96	3	0.949528	0.0222745	19.8576	18.8817	19.9459	19.816	19.8576	18.4972	18.8817	19.3921
Q64191	N(4)-(beta-N-acetylglucosaminyl)-L-asparaginase	Aga	1	-0.532541	0.0222926	20.7471	21.2302	20.7471	20.417	20.9171	21.2302	21.2125	21.2361
Q99LR1	Lysophosphatidylserine lipase ABHD12	Abhd12	8	0.314213	0.0222981	20.9742	20.6006	20.9098	20.9742	21.0156	20.6006	20.8113	20.5451
P61750;P84084;Q8BSL7	ADP-ribosylation factor 4	Arf2;Arf4;Arf5	5	0.174116	0.0223951	25.0275	24.8336	25.0233	25.0275	25.0443	24.8336	24.9495	24.7895
P46471	26S proteasome regulatory subunit 7	Psmc2	21	0.0735855	0.0226161	22.8093	22.7265	22.7995	22.8385	22.8093	22.7244	22.7755	22.7265
Q9CQN6	Transmembrane protein 14C	Tmem14c	6	-0.400195	0.022637	24.2535	24.5869	24.2535	24.1642	24.3511	24.5344	24.5869	24.8481
O70503	Very-long-chain 3-oxoacyl-CoA reductase	Hsd17b12	8	0.290634	0.0227683	22.1111	21.7836	22.2006	22.1111	21.9847	21.7348	21.9061	21.7836
O70548	Telethonin	Tcap	12	-0.237905	0.0228524	24.239	24.4862	24.141	24.3443	24.239	24.4234	24.4862	24.5285
Q3V1L4	Cytosolic purine 5'-nucleotidase	Nt5c2	15	0.256985	0.0229274	22.0292	21.7675	21.9388	22.0359	22.0292	21.7675	21.8423	21.6231
P54822	Adenylosuccinate lyase	Adsl	17	-0.0422948	0.0229547	22.3592	22.4015	22.343	22.3805	22.3592	22.4118	22.3962	22.4015
Q64727	Vinculin	Vcl	88	0.170289	0.0229951	25.4892	25.3101	25.5285	25.4892	25.4676	25.2571	25.4073	25.3101
Q9EQK5	Major vault protein	Mvp	35	0.68152	0.0229983	22.8633	22.1825	22.9388	22.8633	22.4551	22.1916	22.1825	21.8385
P19426	Negative elongation factor E	Nelfe	1	1.13412	0.0230138	16.8361	15.6211	17.0319	16.6523	16.8361	15.6211	16.2567	15.2401
Q60737	Casein kinase II subunit alpha	Csnk2a1	15	0.208204	0.0230661	21.6671	21.4874	21.714	21.6671	21.6453	21.5498	21.4874	21.3645
E9QA15	Caldesmon 1	Cald1	28	-0.18652	0.0231271	21.0359	21.2535	21.0359	21.0224	21.1703	21.2302	21.3045	21.2535
Q9CX56	26S proteasome non-ATPase regulatory subunit 8	Psmd8	10	0.100088	0.0231527	22.2125	22.0886	22.2125	22.1426	22.2302	22.1111	22.0886	22.0854
P97792	Coxsackievirus and adenovirus receptor homolog	Cxadr	4	0.550959	0.023222	19.5823	18.9229	19.6731	19.5823	19.3189	18.9229	18.8113	19.1874
P62141	Serine/threonine-protein phosphatase PP1-beta catalytic subunit	Ppp1cb	6	0.12837	0.0232315	21.5498	21.4526	21.5261	21.5498	21.6364	21.417	21.4576	21.4526
Q8BU33	2-hydroxyacyl-CoA lyase 2	Ilvbl	6	0.587559	0.0232516	19.734	19.2113	19.734	19.7634	19.6954	19.2113	19.3857	18.8331
Q8BG51;Q8JZN7	Mitochondrial Rho GTPase 1	Rhot1;Rhot2	1	0.106405	0.0232789	20.5165	20.417	20.4676	20.5545	20.5165	20.3752	20.4273	20.417
P51660	Peroxisomal multifunctional enzyme type 2	Hsd17b4	21	-0.340428	0.0235781	22.7935	23.1991	22.7327	22.8191	22.7935	23.1991	22.9388	23.2288
Q61335	B-cell receptor-associated protein 31	Bcap31	12	0.245156	0.0237294	20.9951	20.7307	20.9601	21.0625	20.9951	20.7307	20.8802	20.6714
E9PVA8	eIF-2-alpha kinase activator GCN1	Gcn1	29	0.340891	0.0237522	20.9243	20.6006	20.9098	20.9243	21.0756	20.6006	20.7796	20.5069
Q9QZD8	Mitochondrial dicarboxylate carrier	Slc25a10	7	0.304572	0.0237563	20.2877	20.0292	20.2877	20.2419	20.3321	20.0292	20.0951	19.8238
P01027	Complement C3	C3	83	0.492996	0.0239061	23.8385	23.2317	23.8576	23.7695	23.8385	23.1565	23.5983	23.2317
Q9CPQ8	ATP synthase subunit g, mitochondrial	Atp5mg	10	-0.0995274	0.023916	26.9977	27.1312	27.0505	26.9977	26.9869	27.1312	27.0711	27.1312
Q9JI78	Peptide-N(4)-(N-acetyl-beta-glucosaminyl)asparagine amidase	Ngly1	3	0.427306	0.0239889	20.5545	20.1581	20.6096	20.5545	20.4972	19.9112	20.3101	20.1581
P07934	Phosphorylase b kinase gamma catalytic chain, skeletal muscle/heart isoform	Phkg1	3	-0.867678	0.0241279	19.2967	20.1946	19.2967	18.9516	19.4596	20.3857	19.7307	20.1946
O35465	Peptidyl-prolyl cis-trans isomerase FKBP8	Fkbp8	5	0.344982	0.0241314	20.3211	20.002	20.1825	20.3538	20.3211	20.002	20.0426	19.778
P11798;Q6PHZ2;Q923T9	Calcium/calmodulin-dependent protein kinase type II subunit alpha	Camk2a;Camk2d;Camk2g	1	0.221321	0.0242187	22.5892	22.3988	22.654	22.5892	22.5404	22.4501	22.3988	22.2707
Q6PDI5	Proteasome adapter and scaffold protein ECM29	Ecpas	45	0.0525265	0.0244937	21.502	21.4476	21.5309	21.4825	21.502	21.4626	21.4476	21.4476
Q8BUY5	Complex I assembly factor TIMMDC1, mitochondrial	Timmdc1	12	-0.233364	0.024512	22.1111	22.2821	21.9742	22.1111	22.1238	22.2821	22.2361	22.391
Q6PAV2	Probable E3 ubiquitin-protein ligase HERC4	Herc4	17	0.245304	0.0245178	20.1825	19.9742	20.3752	20.1825	20.1825	19.9742	20.0559	19.9742
Q9CQB5	CDGSH iron-sulfur domain-containing protein 2	Cisd2	5	0.235499	0.0245458	23.2535	22.9916	23.2535	23.2535	23.1901	22.9916	23.1095	22.8895
Q64442	Sorbitol dehydrogenase	Sord	7	-0.450082	0.0246023	21.1395	21.5451	21.0886	21.1395	21.3101	21.8461	21.5451	21.4972
Q7TN29	Stromal membrane-associated protein 2	Smap2	6	0.442351	0.0246101	19.9459	19.3815	19.6222	19.9882	19.9459	19.3815	19.5069	19.3408
Q99M71	Mammalian ependymin-related protein 1	Epdr1	6	-0.665951	0.024644	19.7731	20.3211	19.7072	19.9039	19.7731	20.8191	20.3211	20.2419
Q7TMM9;Q9CWF2	Tubulin beta-2A chain	Tubb2a;Tubb2b	2	0.306206	0.0246898	23.9043	23.6209	23.9672	23.9043	23.895	23.6209	23.7594	23.4676
O54754	Aldehyde oxidase 1	Aox1	2	-1.59866	0.0247104	17.0102	18.7504	17.8906	17.0102	16.4544	19.0129	18.3879	18.7504
P17879;Q61696	Heat shock 70 kDa protein 1B	Hspa1a;Hspa1b	11	0.749398	0.0248889	21.7056	20.7307	21.4923	21.7056	21.714	20.7307	21.2877	20.6453
P11798;Q6PHZ2	Calcium/calmodulin-dependent protein kinase type II subunit alpha	Camk2a;Camk2d	1	0.237613	0.0249198	23.5285	23.3101	23.5285	23.5285	23.5165	23.3101	23.391	23.1596
Q5GIG6	Serine/threonine-protein kinase TNNI3K	Tnni3k	11	-0.201065	0.0250404	20.9459	21.1765	20.8802	21.0493	20.9459	21.1765	21.1015	21.2006
Q9DCZ4	MICOS complex subunit Mic26	Apoo	8	-0.120805	0.0251335	25.5014	25.5869	25.5105	25.4831	25.5014	25.5841	25.5869	25.6865
Q3UTJ2	Sorbin and SH3 domain-containing protein 2	Sorbs2	41	0.414771	0.0251437	25.0443	24.5165	25.0443	25.1214	24.867	24.5165	24.7796	24.4923
P17710	Hexokinase-1	Hk1	40	0.319195	0.0251635	24.7286	24.4234	24.7024	24.7286	24.7543	24.558	24.4234	24.2463
O89017	Legumain	Lgmn	3	-0.903031	0.0252038	21.2125	22.2006	21.7553	21.2125	21.0951	22.2006	22.5592	22.0122
Q9DCV4	Regulator of microtubule dynamics protein 1	Rmdn1	13	0.108723	0.0253497	23.9316	23.8288	23.9316	23.9134	23.976	23.8764	23.7895	23.8288
P53395	Lipoamide acyltransferase component of branched-chain alpha-keto acid dehydrogenase complex, mitochondrial	Dbt	23	-0.179521	0.0253693	24.2821	24.5045	24.3844	24.275	24.2821	24.5522	24.4234	24.5045
Q9D273	Corrinoid adenosyltransferase MMAB	Mmab	8	-0.379183	0.0256417	21.4676	21.8876	21.5915	21.4676	21.3045	21.9207	21.8876	21.6928
P97300	Neuroplastin	Nptn	3	-0.367776	0.02565	20.6714	21.0559	20.8727	20.5069	20.6714	21.0559	21.0625	21.0359
O09106	Histone deacetylase 1	Hdac1	2	0.823038	0.0256865	18.1752	17.4087	18.2419	18.1752	18.0373	17.4087	17.68	16.8965
Q8R180	ERO1-like protein alpha	Ero1a	5	0.494502	0.0257739	18.9229	18.5805	18.9229	19.1507	18.9112	18.5805	18.6558	18.265
Q61595	Kinectin	Ktn1	49	-0.28776	0.0259997	21.4425	21.6584	21.2535	21.4425	21.4626	21.6584	21.7675	21.5961
O35098	Dihydropyrimidinase-related protein 4	Dpysl4	4	0.438115	0.026014	19.1922	18.7439	19.1922	19.0925	19.29	18.7439	18.562	18.9545
Q9D1P4	Cysteine and histidine-rich domain-containing protein 1	Chordc1	3	-0.318511	0.0260153	19.8667	20.2764	19.8284	19.8666	20.0691	20.1332	20.2764	20.3101
P60824	Cold-inducible RNA-binding protein	Cirbp	4	0.853549	0.0261191	20.9951	20.2185	21.4676	20.9459	20.9951	20.002	20.2185	20.6276
P43276	Histone H1.5	H1-5	7	0.338943	0.0262934	25.2058	24.9495	25.2058	25.1488	25.2891	24.9495	24.9803	24.6971
P42227	Signal transducer and activator of transcription 3	Stat3	20	-0.310591	0.026324	20.8034	21.0886	20.6364	20.8034	20.9098	21.0886	21.1703	21.0224
Q8VCI0	Phospholipase B-like 1	Plbd1	6	-0.46659	0.0263271	19.7586	20.1332	19.6168	19.9287	19.7586	20.1332	20.4375	20.1332
Q9WTX6	Cullin-1	Cul1	14	-0.153359	0.0264512	20.4676	20.654	20.4476	20.4676	20.4676	20.654	20.5261	20.6627
P63321	Ras-related protein Ral-A	Rala	5	0.347354	0.0264682	21.1581	20.7634	21.2302	21.1581	20.9171	20.6886	20.8113	20.7634
Q02357	Ankyrin-1	Ank1	2	-0.685586	0.0265166	21.7265	22.5823	21.6584	21.9847	21.7265	22.5823	22.7077	22.1363
O88685	26S proteasome regulatory subunit 6A	Psmc3	18	0.0868556	0.0265385	23.4551	23.3645	23.4041	23.4676	23.4551	23.3778	23.3645	23.3239
P61759	Prefoldin subunit 3	Vbp1	7	-0.068627	0.0266244	20.3752	20.4476	20.417	20.3645	20.3752	20.4375	20.4775	20.4476
Q9CQM9	Glutaredoxin-3	Glrx3	12	-0.0891978	0.0266748	23.0838	23.1395	23.0275	23.0837	23.0886	23.1901	23.1395	23.1379
Q91UZ5	Inositol monophosphatase 2	Impa2	6	-0.479633	0.0267969	20.7715	21.3376	20.6006	20.7715	20.9601	21.3376	21.0691	21.3645
P50544	Very long-chain specific acyl-CoA dehydrogenase, mitochondrial	Acadvl	50	-0.237002	0.0268373	26.9539	27.217	27.0084	26.9539	26.9316	27.217	27.0813	27.3066
P21981	Protein-glutamine gamma-glutamyltransferase 2	Tgm2	27	0.517181	0.0269064	25.0691	24.6486	25.0608	25.2996	25.0691	24.8385	24.6486	24.391
P13542;Q5SX40;Q91Z83	Myosin-8	Myh1;Myh7;Myh8	3	3.23485	0.0269066	25.0894	21.928	25.3545	25.0894	23.8858	21.928	22.7512	19.9459
Q8BGK2	Inactive ADP-ribosyltransferase ARH2	Adprhl1	16	0.220488	0.0269618	24.7024	24.5105	24.7024	24.8528	24.6376	24.5105	24.5285	24.4923
E9PWR4	Disco-interacting protein 2 homolog C	Dip2c	20	-0.263362	0.026991	19.7056	20.0156	19.7056	19.6204	19.8253	19.8832	20.0426	20.0156
P47962	60S ribosomal protein L5	Rpl5	14	0.157684	0.0270841	22.7161	22.5333	22.7035	22.7161	22.7573	22.5165	22.654	22.5333
Q9QWW1	Homer protein homolog 2	Homer2	6	0.219528	0.0271179	19.5601	19.3211	19.6042	19.4991	19.5601	19.3211	19.2442	19.4395
P09103	Protein disulfide-isomerase	P4hb	33	0.260502	0.027258	23.5285	23.2346	23.4551	23.5404	23.5285	23.2346	23.3778	23.1301
Q9CQF4	Mitochondrial transcription rescue factor 1	Mtres1	7	-0.16061	0.0273942	21.6051	21.7553	21.6051	21.654	21.5545	21.8346	21.7553	21.7056
Q80YV4	4'-phosphopantetheine phosphatase	Pank4	16	-0.174332	0.0277746	21.0426	21.2302	21.0426	20.9742	21.0886	21.2302	21.265	21.1332
P14869	60S acidic ribosomal protein P0	Rplp0	9	0.118181	0.0279596	23.5045	23.417	23.5045	23.4923	23.5285	23.3239	23.4298	23.417
O55126	Protein NipSnap homolog 2	Nipsnap2	22	-0.161254	0.0280164	26.4984	26.6595	26.5754	26.4984	26.4984	26.6595	26.632	26.7645
Q91Z83	Myosin-7	Myh7	63	3.3434	0.0280651	27.1015	23.9043	27.3745	27.1015	25.8623	23.9043	24.6649	21.7389
Q9D898	Actin-related protein 2/3 complex subunit 5-like protein	Arpc5l	5	0.264503	0.0282751	23.3511	23.1015	23.3511	23.3778	23.2961	23.1015	23.1931	22.937
Q7TT45;Q99K70	Ras-related GTP-binding protein D	Rragc;Rragd	5	0.461933	0.0283419	21.68	21.1581	21.68	21.4775	21.7634	21.1581	21.3752	21.002
Q9D1G3	Protein-cysteine N-palmitoyltransferase HHAT-like protein	Hhatl	13	-0.263357	0.0283463	24.6865	24.9672	24.7389	24.5463	24.6865	24.8142	24.9672	24.9803
P12970	60S ribosomal protein L7a	Rpl7a	15	0.165683	0.0283473	23.8288	23.6649	23.7995	23.8288	23.8481	23.6649	23.7389	23.5754
Q4VAE3	Transmembrane protein 65	Tmem65	6	-0.303355	0.0283498	23.3778	23.7594	23.3376	23.3778	23.5983	23.6649	23.7594	23.7995
Q9Z0X4	cGMP-inhibited 3',5'-cyclic phosphodiesterase A	Pde3a	7	0.12933	0.0287047	19.3386	19.209	19.2877	19.343	19.3387	19.209	19.1282	19.2442
Q921U8	Smoothelin	Smtn	17	-0.334085	0.0287488	19.6697	20.0821	19.6697	19.6042	19.8606	19.9214	20.1332	20.0821
Q148V7	RAB11-binding protein RELCH	Relch	9	0.314451	0.0287876	19.5823	19.3255	19.5823	19.8113	19.5545	19.4211	19.3255	19.2581
Q6P5H2	Nestin	Nes	16	-0.427483	0.0287951	19.4756	19.9742	19.4756	19.3233	19.68	20.0156	19.9742	19.7715
Q6PD31	Trafficking kinesin-binding protein 1	Trak1	10	-0.198009	0.0288204	19.5897	19.7812	19.6024	19.5897	19.5318	19.6731	19.8636	19.7812
Q9DAT5	Mitochondrial tRNA-specific 2-thiouridylase 1	Trmu	7	-0.219129	0.0291031	19.3962	19.6453	19.3962	19.4696	19.3667	19.5223	19.7223	19.6453
Q68FD5	Clathrin heavy chain 1	Cltc	73	0.200692	0.0291546	24.6918	24.48	24.6918	24.6918	24.7492	24.48	24.6209	24.4298
Q3TJZ6	Protein FAM98A	Fam98a	5	-0.0600033	0.0291698	20.654	20.7056	20.654	20.654	20.6364	20.7056	20.7389	20.68
G5E870	E3 ubiquitin-protein ligase TRIP12	Trip12	10	0.480959	0.029188	19.7223	19.2855	19.7406	19.606	19.7223	19.4004	19.2855	18.9402
P30115	Glutathione S-transferase A3	Gsta3	5	-0.353046	0.0292147	20.4576	20.714	20.5069	20.3962	20.4576	20.714	21.0088	20.6971
P04186	Complement factor B	Cfb	11	0.55853	0.0292436	20.68	19.9601	20.5261	20.7223	20.68	19.8965	20.3962	19.9601
P62242	40S ribosomal protein S8	Rps8	7	0.144399	0.029247	23.7077	23.5754	23.7077	23.7077	23.7995	23.5754	23.654	23.5522
P13541;Q91Z83	Myosin-3	Myh3;Myh7	2	3.25945	0.0294373	23.9933	20.9171	24.2678	23.9933	22.6714	20.9171	21.5165	18.7207
Q07813	Apoptosis regulator BAX	Bax	4	0.379759	0.029561	20.6628	20.3321	20.6096	20.6627	20.8346	20.3321	20.4775	20.1581
Q3V3R4	Integrin alpha-1	Itga1	16	0.102012	0.0296542	21.1269	21.0292	21.1703	21.0756	21.1269	21.0292	21.0426	20.9951
Q9WUB3	Glycogen phosphorylase, muscle form	Pygm	48	-0.194894	0.0296646	26.1174	26.3444	26.0526	26.1174	26.1546	26.3629	26.2021	26.3443
B9EJ86	Oxysterol-binding protein-related protein 8	Osbpl8	11	0.429843	0.0296927	20.6886	20.265	20.8576	20.5638	20.6886	20.265	20.4476	20.1079
P48036	Annexin A5	Anxa5	26	0.289587	0.0299239	25.6838	25.4138	25.7182	25.6838	25.654	25.4138	25.5344	25.239
P47968	Ribose-5-phosphate isomerase	Rpia	5	-0.212771	0.0300693	19.9272	20.1946	19.9112	20.0156	19.9272	20.1946	20.2419	20.0559
Q641P0;Q99JY9	Actin-related protein 3B	Actr3;Actr3b	4	0.205421	0.0301234	21.632	21.5069	21.632	21.6231	21.7389	21.5117	21.5069	21.3592
Q8R326	Paraspeckle component 1	Pspc1	7	0.540985	0.0301285	20.5356	19.9459	20.4066	20.6453	20.5356	19.9459	20.265	19.7537
Q8BP40	Lysophosphatidic acid phosphatase type 6	Acp6	15	-0.0952333	0.030227	21.4425	21.5117	21.4425	21.4015	21.4425	21.5731	21.5117	21.4874
Q99J39	Malonyl-CoA decarboxylase, mitochondrial	Mlycd	21	-0.189931	0.0302888	23.0476	23.2273	22.9495	23.0772	23.0476	23.2821	23.1348	23.2273
O08553;Q62188	Dihydropyrimidinase-related protein 2	Dpysl2;Dpysl3	4	0.443545	0.0303713	23.1174	22.6475	23.1174	23.0854	23.3239	22.6475	22.9548	22.5938
Q8BFZ9	Erlin-2	Erlin2	8	0.356504	0.0304149	21.417	21.0886	21.417	21.4526	21.3645	21.2185	21.0886	20.8576
Q3TYS2	Cytochrome b-245 chaperone 1	Cybc1	4	0.273796	0.0304506	19.5432	19.2764	19.5432	19.4211	19.6168	19.2764	19.1382	19.3452
Q8K4L3	Supervillin	Svil	62	0.171932	0.0304772	21.5823	21.3645	21.5823	21.5915	21.5309	21.3645	21.4923	21.3321
P97820	Mitogen-activated protein kinase kinase kinase kinase 4	Map4k4	5	0.241331	0.0305064	20.5915	20.3645	20.7307	20.5915	20.5638	20.4874	20.3645	20.3101
Q9DCM2	Glutathione S-transferase kappa 1	Gstk1	23	-0.245821	0.0305192	24.0935	24.3511	24.0935	23.9847	24.1565	24.217	24.4041	24.3511
Q7TMM9;Q922F4;Q9CWF2	Tubulin beta-2A chain	Tubb2a;Tubb2b;Tubb6	1	0.375013	0.0306992	22.7161	22.2821	22.4375	22.7161	22.7573	22.2821	22.3457	22.1581
Q6ZWV3	60S ribosomal protein L10	Rpl10	6	0.201829	0.0307676	22.6276	22.3857	22.6342	22.6074	22.6276	22.3376	22.5404	22.3857
Q6PEB6	MOB-like protein phocein	Mob4	2	0.473906	0.0308931	20.714	20.1206	20.7553	20.5261	20.714	20.0156	20.4375	20.1206
Q8VDG5	Phosphopantothenate--cysteine ligase	Ppcs	8	0.228415	0.0310363	20.6364	20.417	20.7876	20.6006	20.6364	20.5261	20.417	20.3962
P62908	40S ribosomal protein S3	Rps3	19	0.133265	0.0312412	24.4862	24.3376	24.4862	24.48	24.5105	24.3376	24.4362	24.3031
Q9CQZ5	NADH dehydrogenase [ubiquinone] 1 alpha subcomplex subunit 6	Ndufa6	12	-0.139458	0.0314305	25.6757	25.7995	25.6757	25.6838	25.632	25.7995	25.7364	25.8741
Q8R001	Microtubule-associated protein RP/EB family member 2	Mapre2	14	0.288698	0.0318132	21.6453	21.3752	21.6453	21.7013	21.5165	21.3752	21.4273	21.1946
Q9CWZ7	Gamma-soluble NSF attachment protein	Napg	7	0.192135	0.0319406	20.5823	20.417	20.654	20.5823	20.5545	20.4874	20.417	20.3101
P09411	Phosphoglycerate kinase 1	Pgk1	40	0.17454	0.0319883	26.6458	26.4862	26.6458	26.726	26.632	26.5754	26.4186	26.4862
P68372;Q9D6F9	Tubulin beta-4B chain	Tubb4a;Tubb4b	3	0.22139	0.0321091	27.3239	27.0505	27.3239	27.3239	27.341	27.0505	27.2445	27.0296
O54931	A-kinase anchor protein 2	Akap2	17	0.233682	0.0321185	21.7675	21.5451	21.6584	21.7675	21.8034	21.5451	21.5869	21.3962
Q9JLI8	Squamous cell carcinoma antigen recognized by T-cells 3	Sart3	8	0.414717	0.0321458	19.343	18.9142	19.4313	19.343	19.1432	18.9141	19.0453	18.714
Q91VF2	Histamine N-methyltransferase	Hnmt	5	-0.350571	0.0321495	19.6042	19.8606	19.647	19.419	19.6042	19.8606	20.0691	19.7923
Q62241	U1 small nuclear ribonucleoprotein C	Snrpc	2	1.02947	0.0321882	19.3343	18.1655	19.6024	18.6971	19.3343	17.8906	18.4894	18.1655
P16406	Glutamyl aminopeptidase	Enpep	7	0.296892	0.0322113	20.5356	20.1457	20.5915	20.5356	20.3962	20.1332	20.3538	20.1457
Q9CZX8	40S ribosomal protein S19	Rps19	14	0.138744	0.0323182	23.8288	23.6649	23.7995	23.8288	23.8764	23.654	23.7695	23.6649
Q80VP1;Q91W69	Epsin-1	Epn1;Epn3	1	-0.498353	0.0323289	18.1155	18.6937	18.1155	18.3365	18.0426	18.4293	18.8666	18.6937
P62137;P62141;P63087	Serine/threonine-protein phosphatase PP1-alpha catalytic subunit	Ppp1ca;Ppp1cb;Ppp1cc	6	0.146704	0.0324631	23.9043	23.7077	23.9043	23.8191	23.9316	23.7077	23.7995	23.7077
Q3UMT1	Protein phosphatase 1 regulatory subunit 12C	Ppp1r12c	13	0.290546	0.03258	21.0359	20.7471	21.0625	21.0359	20.8876	20.5638	20.8034	20.7471
P48410	ATP-binding cassette sub-family D member 1	Abcd1	5	-0.439368	0.0326053	19.3983	19.9882	19.3983	19.3473	19.6114	19.9882	19.6714	20.0156
Q9JK42	[Pyruvate dehydrogenase (acetyl-transferring)] kinase isozyme 2, mitochondrial	Pdk2	16	0.142425	0.0326681	24.3307	24.1719	24.3975	24.3307	24.3101	24.275	24.1642	24.1719
P23198	Chromobox protein homolog 3	Cbx3	5	0.339244	0.0326863	19.8651	19.5489	19.8651	19.816	20.002	19.5489	19.714	19.4025
Q8CIB5	Fermitin family homolog 2	Fermt2	27	0.0924123	0.0328003	22.7451	22.6518	22.7995	22.714	22.7451	22.6409	22.6886	22.6518
Q505D7	Optic atrophy 3 protein homolog	Opa3	5	-0.128214	0.0328028	22.4726	22.5869	22.4196	22.5141	22.4726	22.5869	22.5522	22.6518
P35385	Heat shock protein beta-7	Hspb7	11	0.21364	0.0328563	24.275	24.0935	24.2096	24.4105	24.275	24.1332	24.0935	24.0275
Q9D8N0	Elongation factor 1-gamma	Eef1g	23	0.172655	0.0328749	23.7492	23.5638	23.6431	23.7492	23.8288	23.5754	23.5638	23.5638
Q8R1Q8	Cytoplasmic dynein 1 light intermediate chain 1	Dync1li1	19	0.153603	0.0329257	22.002	21.8385	22.002	22.0156	21.9134	21.8764	21.8385	21.7553
Q68FL4;Q80SW1	Putative adenosylhomocysteinase 3	Ahcyl1;Ahcyl2	4	0.157139	0.0330629	20.1332	20.0292	20.1332	20.1332	20.1703	20.0292	20.0426	19.8936
Q91ZV0	Melanoma inhibitory activity protein 2	Mia2	6	-0.593506	0.0331221	18.1898	18.9229	18.1898	18.6204	18.1556	19.1028	18.9229	18.7207
Q91VK1	eIF5-mimic protein 1	Bzw2	20	-0.121267	0.0332942	22.58	22.6822	22.58	22.6029	22.4825	22.6584	22.6886	22.6822
P05064	Fructose-bisphosphate aldolase A	Aldoa	32	-0.170879	0.0333511	27.5898	27.726	27.5754	27.5898	27.5969	27.6865	27.726	27.8623
O08528	Hexokinase-2	Hk2	34	0.0678927	0.0333794	24.002	23.9316	24.002	24.0105	23.9584	23.895	23.9316	23.9406
Q8R3U1	Phospholipase A and acyltransferase 3	Plaat3	3	0.398741	0.0333837	18.7537	18.3878	18.5805	18.7537	18.9488	18.3879	18.4616	18.2372
P30412	Peptidyl-prolyl cis-trans isomerase C	Ppic	2	0.641593	0.0334972	21.002	20.2185	20.5451	21.002	21.0493	20.0156	20.4375	20.2185
Q64521	Glycerol-3-phosphate dehydrogenase, mitochondrial	Gpd2	27	-0.153609	0.0336988	21.5165	21.6628	21.5638	21.5165	21.5117	21.6186	21.6627	21.7715
Q9ERV1	E3 ubiquitin-protein ligase makorin-2	Mkrn2	3	-0.222792	0.0337288	19.3878	19.6749	19.3879	19.3709	19.5413	19.5713	19.6749	19.7223
Q8BH04	Phosphoenolpyruvate carboxykinase [GTP], mitochondrial	Pck2	8	0.30393	0.0337598	20.3101	20.002	20.2764	20.343	20.3101	20.002	20.1703	19.8454
O09167	60S ribosomal protein L21	Rpl21	4	0.172796	0.0337633	22.9812	22.8385	22.9619	22.9812	23.0999	22.8385	22.9006	22.7856
Q9CZU4	GTPase Era, mitochondrial	Eral1	1	-0.478027	0.0337794	18.8995	19.4795	19.1307	18.8995	18.7307	19.2066	19.5088	19.4795
E9Q3L2	Phosphatidylinositol 4-kinase alpha	Pi4ka	31	0.204539	0.0337825	20.7056	20.5069	20.7553	20.7056	20.5915	20.3962	20.5356	20.5069
Q9CQD1	Ras-related protein Rab-5A	Rab5a	5	0.434633	0.0337837	22.239	21.953	22.239	22.4898	22.1946	21.9531	21.6714	21.9951
Q8C5Q4	G-rich sequence factor 1	Grsf1	9	-0.179336	0.0337869	21.3156	21.4972	21.3156	21.4273	21.2989	21.6051	21.4972	21.4775
P49312	Heterogeneous nuclear ribonucleoprotein A1	Hnrnpa1	12	0.247105	0.0337882	24.1719	23.9316	24.217	24.1095	24.1719	23.7895	24.0359	23.9316
Q99MN9	Propionyl-CoA carboxylase beta chain, mitochondrial	Pccb	27	-0.101118	0.033868	24.6153	24.7389	24.6153	24.6209	24.5869	24.7389	24.6486	24.7389
Q922Q9	Chitinase domain-containing protein 1	Chid1	5	0.365117	0.0339842	18.7439	18.4129	18.8081	18.7439	18.6382	18.4129	18.5165	18.1655
Q8C167	Prolyl endopeptidase-like	Prepl	4	-0.801325	0.0339962	17.5951	18.5049	17.5951	17.3145	18.1507	18.5842	18.5049	18.3752
Q99LD8	N(G),N(G)-dimethylarginine dimethylaminohydrolase 2	Ddah2	6	0.332282	0.0341067	21.6141	21.265	21.4273	21.6141	21.6757	21.265	21.3538	21.1015
Q9QUR7	Peptidyl-prolyl cis-trans isomerase NIMA-interacting 1	Pin1	7	0.121428	0.03412	20.6628	20.5638	20.6627	20.6096	20.6971	20.4775	20.5638	20.5638
Q8BY87	Ubiquitin carboxyl-terminal hydrolase 47	Usp47	12	-0.317015	0.0341653	19.3602	19.7488	19.3603	19.3495	19.3709	19.8034	19.7488	19.4795
Q9QZE7	Translin-associated protein X	Tsnax	4	0.2564	0.0343638	19.3602	19.113	19.3012	19.3603	19.4576	19.113	19.2349	19.002
P68040	Receptor of activated protein C kinase 1	Rack1	12	0.107328	0.0343766	24.3031	24.1946	24.3031	24.2891	24.3645	24.1946	24.2607	24.1795
P19123	Troponin C, slow skeletal and cardiac muscles	Tnnc1	7	0.480539	0.0344731	22.9079	22.4501	22.6714	22.9079	23.1206	22.4501	22.2678	22.5404
P35980	60S ribosomal protein L18	Rpl18	8	0.271256	0.0344807	23.48	23.1856	23.4298	23.48	23.632	23.178	23.3645	23.1856
P06909	Complement factor H	Cfh	6	0.813314	0.0345244	20.5823	19.668	20.4775	20.5823	20.5823	19.668	20.2066	19.3277
Q6KAR6	Exocyst complex component 3	Exoc3	2	0.766555	0.0346384	19.0479	18.5731	18.9854	19.5165	19.0479	18.5731	18.6132	18.0638
Q921J2	GTP-binding protein Rheb	Rheb	8	0.163415	0.0346779	21.7836	21.6497	21.7836	21.7634	21.8346	21.7013	21.6497	21.5404
Q62418	Drebrin-like protein	Dbnl	12	0.319698	0.0348055	20.6971	20.3211	20.7389	20.6971	20.68	20.3211	20.5823	20.2535
Q9CZM2	60S ribosomal protein L15	Rpl15	14	0.121834	0.0349213	23.3376	23.1931	23.3101	23.3376	23.3511	23.1931	23.2821	23.1581
Q5M8N4	Epimerase family protein SDR39U1	Sdr39u1	10	-0.147879	0.0350154	24.5926	24.7594	24.6703	24.5926	24.5344	24.6971	24.7594	24.7846
Q8VCT3	Aminopeptidase B	Rnpep	15	-0.200299	0.0350159	21.1704	21.4067	21.1015	21.1703	21.3101	21.4066	21.417	21.3592
Q9CQ43	Deoxyuridine 5'-triphosphate nucleotidohydrolase	Dut	5	-0.287771	0.035085	21.0156	21.2006	20.8876	21.0156	21.0559	21.2006	21.1946	21.4273
Q01853	Transitional endoplasmic reticulum ATPase	Vcp	50	-0.078956	0.0351298	25.1642	25.2499	25.1174	25.1642	25.1871	25.2499	25.2499	25.2058
Q8R3B1	1-phosphatidylinositol 4,5-bisphosphate phosphodiesterase delta-1	Plcd1	14	0.436497	0.0353244	21.7995	21.5117	21.9637	21.7265	21.7995	21.1519	21.5165	21.5117
Q9D8X2	Coiled-coil domain-containing protein 124	Ccdc124	7	-0.321259	0.0353874	19.2809	19.575	19.2809	19.3941	19.1079	19.6903	19.575	19.4815
Q6P8X1	Sorting nexin-6	Snx6	9	0.337933	0.0353889	20.8576	20.4375	20.8576	20.7796	20.9243	20.4375	20.714	20.3962
Q9D7H3	RNA 3'-terminal phosphate cyclase	RtcA	8	0.238578	0.0354237	20.6453	20.3752	20.4676	20.6714	20.6453	20.3752	20.2764	20.417
P59266	Acyl-coenzyme A diphosphatase FITM2	Fitm2	3	-0.345103	0.0354491	22.4221	22.7533	22.4221	22.1946	22.5285	22.6298	22.7533	22.7975
Q9JHZ2	Progressive ankylosis protein	Ankh	6	-0.333243	0.0354974	19.5526	19.8469	19.4656	19.5526	19.5601	19.8469	19.6886	20.0426
Q61234;Q61235;Q99L88	Alpha-1-syntrophin	Snta1;Sntb1;Sntb2	1	0.213252	0.0354997	22.0756	21.8651	22.0918	22.0756	22.0359	21.8651	21.9637	21.7348
Q3ULJ0	Glycerol-3-phosphate dehydrogenase 1-like protein	Gpd1l	11	0.199935	0.0357099	23.1596	22.9847	23.2535	23.1596	23.1332	23.0724	22.8895	22.9847
O70493	Sorting nexin-12	Snx12	6	0.17654	0.03582	20.6628	20.4375	20.6714	20.6627	20.5165	20.4874	20.4375	20.3962
P49442	Inositol polyphosphate 1-phosphatase	Inpp1	8	0.229937	0.0359787	20.9951	20.8191	20.9742	21.2006	20.9951	20.8191	20.8576	20.8034
Q91VX9	Transmembrane protein 168	Tmem168	4	0.991421	0.0360555	19.2396	18.0638	19.2396	19.3123	19.1581	17.8113	18.8606	18.0638
Q8VBT1	Beta-taxilin	Txlnb	22	-0.136484	0.0361717	22.1269	22.2332	22.0691	22.1612	22.1269	22.2332	22.3239	22.2096
Q5SF07	Insulin-like growth factor 2 mRNA-binding protein 2	Igf2bp2	5	0.853107	0.0361884	18.3836	17.4972	18.209	18.3836	18.5731	17.4972	17.9937	17.1155
Q62179	Semaphorin-4B	Sema4b	2	-0.891635	0.0363279	18.0743	19.0292	17.5805	18.209	18.0743	18.417	19.0925	19.0292
Q8K157	Galactose mutarotase	Galm	6	-0.279206	0.0365411	20.6364	20.9316	20.6364	20.6971	20.5731	21.0493	20.9316	20.7634
P26262	Plasma kallikrein	Klkb1	4	0.754948	0.036666	19.0426	18.5011	19.0426	19.3473	18.8545	17.9316	18.547	18.5011
Q9WTI7	Unconventional myosin-Ic	Myo1c	44	0.0807546	0.0369196	23.0241	22.9261	23.0241	22.9882	23.0509	22.9261	22.9777	22.9171
Q9D8C4	Interferon-induced 35 kDa protein homolog	Ifi35	1	1.39203	0.0369664	17.8423	16.2023	17.8423	17.1155	18.2604	16.9316	15.9083	16.2023
O09174	Alpha-methylacyl-CoA racemase	Amacr	10	-0.166046	0.0370446	22.0325	22.2448	22.1015	22.0326	22.0156	22.2448	22.1238	22.2792
P15532;Q01768	Nucleoside diphosphate kinase A	Nme1;Nme2	8	0.0656713	0.0370903	25.8044	25.7415	25.824	25.7645	25.8044	25.7077	25.7415	25.7466
Q91VW5	Golgin subfamily A member 4	Golga4	17	-0.402337	0.037107	18.9658	19.3857	18.9658	19.1531	18.7891	19.4991	19.3857	19.2302
Q62446	Peptidyl-prolyl cis-trans isomerase FKBP3	Fkbp3	11	0.139141	0.037138	24.0359	23.895	24.0691	24.0359	23.9406	23.8288	23.895	23.9043
P56959	RNA-binding protein FUS	Fus	7	0.177289	0.0371796	22.9261	22.7056	22.9261	22.8651	22.937	22.6562	22.8346	22.7056
Q9CRB2	H/ACA ribonucleoprotein complex subunit 2	Nhp2	2	0.64296	0.0374884	20.2419	19.6714	20.3857	20.2419	20.1079	19.898	19.6714	19.2372
Q6GQT9	Nodal modulator 1	Nomo1	18	0.0991408	0.0375773	20.7796	20.6628	20.7796	20.7471	20.8269	20.7307	20.6627	20.6627
P21278;P21279;P30677	Guanine nucleotide-binding protein subunit alpha-11	Gna11;Gna14;Gnaq	1	0.35706	0.0375795	22.2096	21.9316	22.3156	22.1916	22.2096	22.0426	21.6714	21.9316
P70279	Surfeit locus protein 6	Surf6	2	0.537901	0.0376569	19.1556	18.5657	19.1556	18.724	19.1581	18.2741	18.5842	18.5657
Q99J77	Sialic acid synthase	Nans	4	0.370892	0.0378034	20.5915	20.1332	20.5915	20.5069	20.654	20.0691	20.4375	20.1332
O35682	Myeloid-associated differentiation marker	Myadm	6	0.192036	0.037808	23.7695	23.6096	23.7695	23.7182	23.9043	23.5522	23.6096	23.654
Q91YE8	Synaptopodin-2	Synpo2	26	-0.0763741	0.0378355	22.1704	22.2535	22.1395	22.2155	22.1703	22.2707	22.2535	22.2302
Q9Z0U1	Tight junction protein ZO-2	Tjp2	18	0.248446	0.0381693	19.8995	19.6186	19.8995	19.6971	19.9316	19.6186	19.64	19.5242
Q8BWW9	Serine/threonine-protein kinase N2	Pkn2	5	0.301761	0.0382026	19.7223	19.4004	19.8591	19.5933	19.7223	19.5413	19.4004	19.3277
P57780;Q7TPR4	Alpha-actinin-4	Actn1;Actn4	8	0.242493	0.0382484	24.4676	24.217	24.4923	24.4425	24.4676	24.217	24.3645	24.0935
Q01341	Adenylate cyclase type 6	Adcy6	8	0.427697	0.0383524	24.8191	24.5045	25.1135	24.7846	24.8191	24.3031	24.5045	24.6264
Q6P9N1	Hyccin	Fam126a	1	0.139938	0.0384486	19.9601	19.816	19.9171	19.9601	19.9742	19.816	19.734	19.8817
P23591	GDP-L-fucose synthase	Gfus	8	0.471078	0.0384829	21.3045	20.9316	21.5404	21.3045	21.3045	20.6714	21.1332	20.9316
Q925I1	ATPase family AAA domain-containing protein 3	Atad3	29	0.073417	0.0385475	22.9098	22.821	22.9098	22.9098	22.8727	22.821	22.7895	22.8614
Q61165	Sodium/hydrogen exchanger 1	Slc9a1	1	0.987073	0.038563	18.2832	17.3233	17.9083	18.2832	18.3624	17.3233	17.6311	16.6382
Q9D6S7	Ribosome-recycling factor, mitochondrial	Mrrf	6	-0.129965	0.0385706	22.7369	22.8327	22.654	22.7369	22.7755	22.8987	22.8327	22.8249
Q9R0L6	Pericentriolar material 1 protein	Pcm1	7	0.539763	0.0385714	19.0899	18.5545	18.7173	19.1231	19.0899	18.562	18.5545	18.1946
P46414	Cyclin-dependent kinase inhibitor 1B	Cdkn1b	2	0.416949	0.0386901	19.4108	19.0664	19.4108	19.2466	19.4313	18.6971	19.0743	19.0664
Q9Z2N8	Actin-like protein 6A	Actl6a	7	-0.298515	0.0387048	20.1457	20.5069	20.0821	20.1457	20.3962	20.4676	20.5069	20.5451
Q8CAA7	Glucose 1,6-bisphosphate synthase	Pgm2l1	2	0.459419	0.0390024	19.1257	18.5127	18.9882	19.1825	19.1257	18.92	18.4854	18.5127
P49813;Q9JHJ0	Tropomodulin-1	Tmod1;Tmod3	1	0.112078	0.0390156	23.5983	23.4923	23.5983	23.5983	23.5404	23.5045	23.4923	23.4041
Q8VCR3	Transmembrane protein 242	Tmem242	1	-0.307663	0.0391652	19.6886	19.9459	19.4354	19.734	19.6886	19.9459	19.9882	19.8469
Q6A0A2	La-related protein 4B	Larp4b	2	-0.383643	0.0393816	18.2137	18.606	18.2137	18.4252	18.1703	18.8454	18.606	18.5088
Q8CFX1	GDH/6PGL endoplasmic bifunctional protein	H6pd	8	0.191994	0.0395048	19.6869	19.4656	19.6783	19.7056	19.6869	19.6204	19.4087	19.4656
P10852	4F2 cell-surface antigen heavy chain	Slc3a2	6	0.42833	0.0395199	19.3343	18.8936	19.3343	19.2627	19.373	18.8936	19.1357	18.6558
O88384	Vesicle transport through interaction with t-SNAREs homolog 1B	Vti1b	6	0.552319	0.0396373	20.9459	20.3857	20.5823	20.9459	21.1703	20.4375	20.3857	20.2185
Q9JIW9	Ras-related protein Ral-B	Ralb	4	0.187705	0.039761	19.8144	19.6505	19.7307	19.8636	19.8144	19.6766	19.6505	19.5185
Q6P2K6	Serine/threonine-protein phosphatase 4 regulatory subunit 3A	Ppp4r3a	2	1.06943	0.0398962	17.6382	16.4544	17.4252	17.6382	17.7207	15.9658	17.1556	16.4544
Q6ZWN5	40S ribosomal protein S9	Rps9	16	0.104485	0.0399004	24.558	24.4488	24.558	24.5225	24.6096	24.4488	24.5045	24.4234
P60766	Cell division control protein 42 homolog	Cdc42	7	0.271844	0.0401168	22.2125	21.9243	22.1111	22.2477	22.2125	21.7755	22.0559	21.9243
P10518	Delta-aminolevulinic acid dehydratase	Alad	12	-0.250098	0.0403158	22.3073	22.5498	22.2707	22.4221	22.3073	22.7182	22.4825	22.5498
Q9R111	Guanine deaminase	Gda	8	-0.33362	0.040428	19.8621	20.2877	19.8621	19.8238	19.9459	20.343	20.2877	20.002
Q6PHQ9	Polyadenylate-binding protein	Pabpc4	18	0.12314	0.0404998	23.5045	23.3645	23.48	23.5045	23.5285	23.3645	23.4551	23.3239
Q8BFQ8	Glutamine amidotransferase-like class 1 domain-containing protein 1	Gatd1	1	0.125065	0.040571	21.3752	21.2877	21.4576	21.3752	21.3752	21.2185	21.2877	21.3266
P63044	Vesicle-associated membrane protein 2	Vamp2	1	1.09482	0.0406379	20.4576	19.3983	20.0559	20.7389	20.4576	18.7537	19.816	19.3983
Q8R4X3	RNA-binding protein 12	Rbm12	3	0.437286	0.0407099	18.5951	18.0047	18.5951	18.624	18.4129	18.3667	18.0047	17.9488
Q9DBM2	Peroxisomal bifunctional enzyme	Ehhadh	7	-0.432194	0.0408914	20.8576	21.4324	20.8651	20.8576	20.8576	21.4425	21.002	21.4324
Q8N9S3	Activator of 90 kDa heat shock protein ATPase homolog 2	Ahsa2	2	-0.41072	0.0408995	17.7273	18.2232	17.9316	17.7207	17.7273	18.4004	18.2232	17.9882
Q9D5V5	Cullin-5	Cul5	24	-0.121092	0.0409359	21.6006	21.6886	21.5165	21.6006	21.6006	21.6453	21.7471	21.6886
Q62393	Tumor protein D52	Tpd52	5	0.360943	0.0413034	20.7056	20.3857	20.6971	20.8876	20.7056	20.3857	20.5915	20.2302
Q99JB8	Protein kinase C and casein kinase II substrate protein 3	Pacsin3	15	0.328271	0.041387	22.7265	22.4526	22.8481	22.7265	22.6096	22.4526	22.5165	22.2302
O55131	Septin-7	Septin7	16	0.212601	0.0413877	22.7594	22.5592	22.7675	22.7451	22.7594	22.5592	22.6606	22.4144
O08528;P17710	Hexokinase-2	Hk1;Hk2	7	0.286263	0.041588	25.6403	25.417	25.8044	25.5926	25.6403	25.5045	25.417	25.2571
P16045	Galectin-1	Lgals1	8	0.27815	0.0416552	24.0609	23.7695	23.8858	24.0608	24.1946	23.8191	23.7182	23.7695
P42208	Septin-2	Septin2	13	0.232177	0.0416743	22.58	22.3645	22.6006	22.5754	22.58	22.3645	22.4825	22.2125
Q61586	Glycerol-3-phosphate acyltransferase 1, mitochondrial	Gpam	10	-0.345016	0.041685	20.9742	21.3266	21.1395	20.895	20.9742	21.5165	21.2006	21.3266
Q9WVH9	Fibulin-5	Fbln5	7	0.494713	0.0419467	24.0359	23.6209	23.8288	24.1946	24.0359	23.6209	23.6865	23.2678
P28271	Cytoplasmic aconitate hydratase	Aco1	26	0.072635	0.0420381	22.4067	22.3184	22.3538	22.4066	22.4093	22.3184	22.2877	22.3457
P62852	40S ribosomal protein S25	Rps25	7	0.135981	0.042138	24.7995	24.6486	24.7895	24.8093	24.7995	24.6486	24.7492	24.5926
O88456	Calpain small subunit 1	Capns1	9	0.136901	0.0421881	22.7327	22.5846	22.6584	22.7327	22.7594	22.6386	22.5846	22.5165
Q9EPL9	Peroxisomal acyl-coenzyme A oxidase 3	Acox3	8	-0.388438	0.0422721	19.4232	19.8284	19.3667	19.4232	19.6006	19.8284	19.6714	20.0559
Q71FD7	Filamin-binding LIM protein 1	Fblim1	4	0.138133	0.0423604	21.9171	21.7512	21.9352	21.8689	21.9171	21.7512	21.7056	21.8499
Q9D6M3	Mitochondrial glutamate carrier 1	Slc25a22	8	-0.270306	0.0426039	21.8727	22.0821	21.8727	21.8764	21.8499	22.3156	22.0122	22.0821
P17751	Triosephosphate isomerase	Tpi1	16	0.0890357	0.0426103	27.3153	27.2535	27.3153	27.3494	27.2979	27.2625	27.1795	27.2535
P99024;Q7TMM9;Q9CWF2;Q9ERD7	Tubulin beta-5 chain	Tubb2a;Tubb2b;Tubb3;Tubb5	3	0.327738	0.0426307	25.7796	25.4583	25.7796	25.7234	25.8312	25.4583	25.632	25.2607
Q7TMM9	Tubulin beta-2A chain	Tubb2a	1	0.309278	0.0427423	21.5731	21.2302	21.4324	21.5731	21.6757	21.3962	21.2302	21.1269
Q91YS8	Calcium/calmodulin-dependent protein kinase type 1	Camk1	9	0.257384	0.0430027	22.3017	22.0224	22.1673	22.3017	22.4375	22.1238	22.0224	21.9882
O08992	Syntenin-1	Sdcbp	3	-0.635078	0.0431436	19.0265	19.898	18.9964	19.4354	19.0265	19.898	20.002	19.4636
Q9Z0N1	Eukaryotic translation initiation factor 2 subunit 3, X-linked	Eif2s3x	14	0.156141	0.0431801	22.2125	22.0156	22.1946	22.2125	22.2332	21.9951	22.1612	22.0156
Q8CHP8	Glycerol-3-phosphate phosphatase	Pgp	7	0.114881	0.04319	22.7675	22.6141	22.6907	22.7675	22.7695	22.6141	22.5846	22.6843
P11688	Integrin alpha-5	Itga5	6	0.567911	0.043202	20.0691	19.4314	20.0691	19.9316	20.0691	19.4313	19.7939	19.1407
Q9JJI8	60S ribosomal protein L38	Rpl38	4	0.202974	0.0433478	22.9116	22.6518	22.9637	22.867	22.9116	22.6518	22.8385	22.6431
Q6ZWV7	60S ribosomal protein L35	Rpl35	3	0.172567	0.043446	23.3101	23.0886	23.3239	23.1503	23.3101	23.1238	23.0886	23.0542
P12382;Q9WUA3	ATP-dependent 6-phosphofructokinase, liver type	Pfkl;Pfkp	2	0.144781	0.0434808	22.4751	22.3321	22.3831	22.4751	22.5213	22.3321	22.3538	22.2593
Q9EPK6	Nucleotide exchange factor SIL1	Sil1	2	-0.435315	0.0435346	19.2442	19.7844	19.2442	19.1482	19.4775	19.8847	19.7844	19.5069
Q99MZ7	Peroxisomal trans-2-enoyl-CoA reductase	Pecr	4	-0.347174	0.0435396	19.3709	19.7056	19.6006	19.3709	19.2604	19.6818	19.7056	19.8861
Q9Z1T1	AP-3 complex subunit beta-1	Ap3b1	18	0.358709	0.0436607	20.8727	20.417	20.8727	20.9098	20.8034	20.417	20.7389	20.3538
Q8BVI5	Syntaxin-16	Stx16	5	0.231082	0.0437682	19.4087	19.2302	19.5088	19.3189	19.4087	19.2466	19.0664	19.2302
Q8BGF6	ELMO domain-containing protein 2	Elmod2	5	0.276578	0.0438723	19.7683	19.5107	19.7683	19.7764	19.7406	19.3101	19.5108	19.6347
Q9DCW4	Electron transfer flavoprotein subunit beta	Etfb	18	-0.150195	0.043876	27.9977	28.2123	28.1065	27.9977	27.9814	28.2123	28.1115	28.2123
Q9ERS2	NADH dehydrogenase [ubiquinone] 1 alpha subcomplex subunit 13	Ndufa13	18	-0.149921	0.0439225	27.6251	27.8203	27.6251	27.611	27.6527	27.8203	27.6798	27.8385
P21107;P58771;P58774	Tropomyosin alpha-3 chain	Tpm1;Tpm2;Tpm3	5	-0.299723	0.0440545	29.066	29.3109	29.066	28.9089	29.1795	29.2602	29.3109	29.4823
Q8R5H1	Ubiquitin carboxyl-terminal hydrolase 15	Usp15	17	-0.124225	0.0440778	20.5069	20.6364	20.5069	20.5638	20.5069	20.6364	20.5915	20.7223
O70622	Reticulon-2	Rtn2	5	-0.214687	0.0442252	24.3444	24.5404	24.3443	24.3031	24.3778	24.4425	24.5404	24.6865
Q9CR00	26S proteasome non-ATPase regulatory subunit 9	Psmd9	5	0.213441	0.0443303	21.9601	21.6757	21.9637	21.9601	21.8499	21.8346	21.6757	21.6231
Q61166	Microtubule-associated protein RP/EB family member 1	Mapre1	8	0.215247	0.0443969	21.2821	21.0559	21.2821	21.2821	21.417	21.0493	21.2302	21.0559
C0HKG5;C0HKG6	Ribonuclease T2-A	Rnaset2a;Rnaset2b	1	0.368244	0.0443986	18.5088	18.0585	18.6096	18.4854	18.5088	18.0319	18.0585	18.4087
Q07456	Protein AMBP	Ambp	1	0.576244	0.0444853	20.6714	20.0292	20.6714	20.5823	20.8423	20.4775	19.8606	20.0292
Q9QX60	Deoxyguanosine kinase, mitochondrial	Dguok	6	-0.168668	0.0446368	22.4118	22.5165	22.2477	22.4144	22.4118	22.4996	22.5638	22.5165
Q76MZ3	Serine/threonine-protein phosphatase 2A 65 kDa regulatory subunit A alpha isoform	Ppp2r1a	28	0.152057	0.0446617	24.0935	23.9316	24.0854	24.0935	24.1565	23.9316	24.0526	23.895
Q6NZB0	DnaJ homolog subfamily C member 8	Dnajc8	5	0.213941	0.0447676	20.2877	20.0426	20.3321	20.1079	20.2877	20.0691	20.0426	19.9742
Q9R0P3	S-formylglutathione hydrolase	Esd	10	0.217441	0.0448897	24.1565	23.9672	24.2607	24.1565	24.0608	23.9672	24.0105	23.8481
Q60598	Src substrate cortactin	Cttn	21	0.368744	0.0451136	23.7695	23.3511	23.7695	23.7594	23.7796	23.3511	23.6431	23.2081
Q921G7	Electron transfer flavoprotein-ubiquinone oxidoreductase, mitochondrial	Etfdh	30	-0.188634	0.0453936	26.3959	26.632	26.3959	26.425	26.3307	26.632	26.4536	26.632
O08663	Methionine aminopeptidase 2	Metap2	11	0.161846	0.04568	21.1079	20.9812	21.1079	21.0426	21.1765	20.9951	20.9812	20.8651
P11930	Acyl-coenzyme A diphosphatase NUDT19	Nudt19	7	-0.308946	0.0457753	20.9243	21.1395	20.9531	20.8576	20.9243	21.0951	21.1395	21.4273
P62311	U6 snRNA-associated Sm-like protein LSm3	Lsm3	2	1.00342	0.0458909	19.4435	18.1002	18.624	19.6078	19.4435	17.9992	18.5657	18.1002
Q9WUZ7	SH3 domain-binding glutamic acid-rich protein	Sh3bgr	9	-0.120637	0.045945	22.3017	22.4221	22.3017	22.391	22.2621	22.4751	22.4221	22.4196
Q8K1J6	CCA tRNA nucleotidyltransferase 1, mitochondrial	Trnt1	14	0.148605	0.0459644	20.8269	20.68	20.9024	20.8269	20.7876	20.68	20.7634	20.6276
P70261	Paladin	Pald1	6	0.272731	0.0460011	18.83	18.5165	18.7602	18.83	18.9573	18.7273	18.5165	18.4854
P70266	6-phosphofructo-2-kinase/fructose-2,6-bisphosphatase 1	Pfkfb1	1	-1.34089	0.0460387	15.9493	16.977	15.9493	16.5102	15.1736	16.9316	17.7471	16.977
Q504M2	Pyruvate dehyrogenase phosphatase catalytic subunit 2	Pdp2	4	-0.488122	0.0462922	19.9742	20.6186	19.9742	19.8666	20.1946	20.2185	20.6627	20.6186
P46061	Ran GTPase-activating protein 1	Rangap1	7	0.520927	0.0464048	19.6628	19.1432	19.5768	19.8454	19.6627	19.1432	19.4736	18.9054
Q9CXE7	Transmembrane emp24 domain-containing protein 5	Tmed5	4	0.215932	0.0464126	20.714	20.5261	20.7955	20.6971	20.714	20.6364	20.5261	20.3962
Q9R1Q7	Proteolipid protein 2	Plp2	2	1.09093	0.0464161	21.8346	20.7634	22.1206	21.4015	21.8346	20.1079	21.2125	20.7634
Q9D824	Pre-mRNA 3'-end-processing factor FIP1	Fip1l1	2	-0.660049	0.0464247	18.0319	18.5011	18.0319	18.0951	17.3752	18.5011	18.5356	18.4456
Q7TN99	Cytoplasmic polyadenylation element-binding protein 3	Cpeb3	2	0.410422	0.0465674	19.7971	19.4067	19.7971	19.7022	20.0426	19.2764	19.6276	19.4066
Q9WTQ5	A-kinase anchor protein 12	Akap12	21	0.174074	0.0466999	20.2185	20.0559	20.2419	20.1825	20.2185	20.1332	20.0559	19.9316
Q8BFR4	N-acetylglucosamine-6-sulfatase	Gns	2	-0.541167	0.04671	18.0899	18.7005	18.0899	18.4696	17.8238	18.7005	18.7039	18.6024
Q8BSL7	ADP-ribosylation factor 2	Arf2	5	0.188632	0.0468059	23.867	23.6757	23.8385	23.867	23.9225	23.5869	23.7995	23.6757
E9Q735	Ubiquitin conjugation factor E4 A	Ube4a	4	0.388805	0.0469569	19.4952	19.2326	19.4952	19.4293	19.5878	19.2326	19.2558	18.8576
Q9JMG1	Endothelial differentiation-related factor 1	Edf1	5	0.390516	0.0469598	20.6364	20.2764	20.4576	20.6364	20.7955	20.0559	20.3857	20.2764
A0A075B5Q3	Immunoglobulin heavy variable 2-5	Ighv2-5	2	-0.307628	0.0469628	17.7923	18.1357	17.7923	18.0156	17.6593	18.1357	18.0743	18.1801
Q99K41	EMILIN-1	Emilin1	22	0.588247	0.0470693	22.5069	22.1111	22.4451	22.6886	22.5069	22.1111	22.1916	21.5731
Q9ES46	Beta-parvin	Parvb	15	0.117174	0.0471675	21.7389	21.6231	21.7915	21.7389	21.68	21.6231	21.6627	21.5731
Q4VC33	E3 ubiquitin-protein transferase MAEA	Maea	1	1.99615	0.0472059	17.7667	15.4106	17.3581	17.7667	18.4656	17.1053	15.0861	15.4106
P15626	Glutathione S-transferase Mu 2	Gstm2	11	-0.134935	0.0472762	23.417	23.5869	23.417	23.3645	23.4551	23.4676	23.5869	23.5869
Q148W8	Serine/threonine/tyrosine-interacting-like protein 2	Styxl2	2	1.68852	0.047354	17.3752	15.5387	17.3752	17.6869	17.3233	16.8847	14.8965	15.5387
Q8VCS3	Glycosaminoglycan xylosylkinase	Fam20b	3	0.310101	0.0474997	19.3667	19.1407	19.5823	19.3667	19.2673	18.9798	19.1655	19.1407
Q2VIS4	Filaggrin-2	Flg2	3	-1.1292	0.0476991	16.3153	17.392	16.2426	16.3153	16.3703	16.7731	17.3921	18.1507
P24369	Peptidyl-prolyl cis-trans isomerase B	Ppib	11	0.267489	0.0479525	23.7389	23.4298	23.6649	23.7594	23.7389	23.4298	23.6209	23.3101
Q80XN0	D-beta-hydroxybutyrate dehydrogenase, mitochondrial	Bdh1	15	-0.730949	0.0480509	24.2821	24.6649	23.7796	24.2961	24.2821	25.2426	24.6649	24.6431
Q68FH4	N-acetylgalactosamine kinase	Galk2	7	0.228568	0.0481297	21.2125	21.0224	21.2877	21.1269	21.2125	21.0691	21.0224	20.8499
Q923X4	Glutaredoxin-2, mitochondrial	Glrx2	1	0.625073	0.0484053	19.5564	18.9714	19.3941	19.5564	20.0156	18.8545	19.265	18.9714
Q63739	Protein tyrosine phosphatase type IVA 1	Ptp4a1	2	-0.63353	0.0485225	16.8238	17.5878	16.8238	16.7602	16.8606	17.7471	17.5878	17.0102
Q71RI9	Kynurenine--oxoglutarate transaminase 3	Kyat3	15	-0.179066	0.0485475	23.9495	24.0854	24.002	23.8288	23.9495	24.0526	24.1795	24.0854
Q62448	Eukaryotic translation initiation factor 4 gamma 2	Eif4g2	22	-0.120789	0.048611	21.0886	21.2302	21.0625	21.1269	21.0886	21.2707	21.2302	21.1395
Q9D5T0	Outer mitochondrial transmembrane helix translocase	Atad1	15	0.0657673	0.0486122	23.6865	23.6096	23.6865	23.632	23.7077	23.6096	23.6209	23.5983
Q8C7X2	ER membrane protein complex subunit 1	Emc1	24	-0.0886345	0.0486513	21.5777	21.6671	21.5592	21.6186	21.5777	21.6671	21.7223	21.632
P48193	Protein 4.1	Epb41	13	-0.117271	0.048685	20.002	20.1206	19.9882	20.002	20.0292	20.1206	20.1946	20.0559
Q9D173	Mitochondrial import receptor subunit TOM7 homolog	Tomm7	2	0.826917	0.0487225	20.4972	19.7273	19.9882	20.654	20.4972	19.1231	19.7273	19.8081
O89114	DnaJ homolog subfamily B member 5	Dnajb5	3	0.738931	0.0488066	19.2558	18.3752	19.3879	19.2558	18.8081	18.0899	18.7699	18.3752
P15508	Spectrin beta chain, erythrocytic	Sptb	75	0.209312	0.0488291	21.4825	21.3045	21.5451	21.4825	21.4425	21.3045	21.3857	21.1519
P27661	Histone H2AX	H2ax	6	0.198622	0.0489819	29.2077	29.0401	29.393	29.1913	29.2077	29.0322	29.1239	29.0401
Q64378	Peptidyl-prolyl cis-trans isomerase FKBP5	Fkbp5	4	0.503716	0.0491143	19.7618	19.2018	19.4736	19.9039	19.7618	19.4354	18.9909	19.2018
Q9DC70	NADH dehydrogenase [ubiquinone] iron-sulfur protein 7, mitochondrial	Ndufs7	10	-0.139526	0.0491997	26.4754	26.632	26.48	26.425	26.4754	26.632	26.5075	26.6595
Q91YR1;Q9Z0P5	Twinfilin-1	Twf1;Twf2	2	0.119591	0.0492842	21.0426	20.9024	21.0691	20.9601	21.0426	20.8576	20.9531	20.9024
P63101	14-3-3 protein zeta/delta	Ywhaz	11	0.179891	0.0494881	24.8858	24.6757	24.8858	24.8764	24.945	24.6757	24.8433	24.6486
Q3TEA8	Heterochromatin protein 1-binding protein 3	Hp1bp3	18	0.398993	0.0496059	22.4825	21.9566	22.5237	22.4273	22.4825	21.9207	22.3592	21.9566
O88587	Catechol O-methyltransferase	Comt	11	0.262771	0.0497386	22.5983	22.3129	22.4775	22.7223	22.5983	22.3129	22.4551	22.2419
P62874;P62880;Q61011	Guanine nucleotide-binding protein G(I)/G(S)/G(T) subunit beta-1	Gnb1;Gnb2;Gnb3	2	0.160773	0.0498401	23.4425	23.3101	23.5638	23.4041	23.4425	23.3101	23.3645	23.2535
Q9CQ22	Ragulator complex protein LAMTOR1	Lamtor1	4	0.162553	0.049996	20.1332	19.9601	20.0691	20.1332	20.1457	20.0426	19.9601	19.8576
P50580	Proliferation-associated protein 2G4	Pa2g4	17	0.203293	0.0500862	22.4701	22.2214	22.502	22.417	22.4701	22.2214	22.3936	22.1642
O55023	Inositol monophosphatase 1	Impa1	8	0.118525	0.0501714	22.6209	22.5237	22.6006	22.6209	22.6886	22.5237	22.5731	22.4576
P12367	cAMP-dependent protein kinase type II-alpha regulatory subunit	Prkar2a	13	0.140598	0.0501733	22.4375	22.3239	22.4196	22.4375	22.4849	22.3239	22.2185	22.3778
Q9DC16	Endoplasmic reticulum-Golgi intermediate compartment protein 1	Ergic1	6	0.389728	0.0502829	20.654	20.1457	20.4775	20.7715	20.654	20.1206	20.4676	20.1457
P50637	Translocator protein	Tspo	8	0.475052	0.0503452	22.4067	22.0426	22.5846	22.2332	22.4066	22.0426	22.0983	21.6584
Q8BG51	Mitochondrial Rho GTPase 1	Rhot1	11	-0.0752818	0.0504848	22.1174	22.1765	22.1426	22.0526	22.1174	22.1886	22.1765	22.1734
P57780;Q7TPR4;Q9JI91	Alpha-actinin-4	Actn1;Actn2;Actn4	16	0.120288	0.0508139	27.8504	27.7129	27.8504	27.8973	27.7518	27.726	27.6998	27.7129
Q9DCJ5	NADH dehydrogenase [ubiquinone] 1 alpha subcomplex subunit 8	Ndufa8	10	-0.115679	0.0508229	25.7543	25.8811	25.7543	25.7594	25.7415	25.8811	25.7895	25.9316
Q8BYY4	Tetratricopeptide repeat protein 39B	Ttc39b	2	0.530946	0.051022	18.8995	18.5394	19.0821	18.8995	18.7828	18.5842	18.5394	18.0479
Q8BFY9;Q99LG2	Transportin-1	Tnpo1;Tnpo2	4	0.195127	0.0510672	20.9812	20.85	20.9812	20.9171	21.0756	20.8499	20.8499	20.6886
P06801	NADP-dependent malic enzyme	Me1	24	-0.237471	0.0511078	22.5592	22.7715	22.5592	22.6164	22.5545	22.976	22.695	22.7715
Q99KP6	Pre-mRNA-processing factor 19	Prpf19	8	0.203811	0.0512172	21.3101	21.0426	21.3101	21.3321	21.1703	21.0426	21.1703	20.9882
P62700	Protein yippee-like 5	Ypel5	1	0.263625	0.0512958	18.1257	17.7796	18.1257	17.9658	18.1655	17.7796	17.7207	17.9658
P28650	Adenylosuccinate synthetase isozyme 1	Adss1	22	0.240201	0.0514611	24.5754	24.2961	24.6971	24.5754	24.4362	24.2961	24.417	24.275
P10853;Q64478;Q6ZWY9	Histone H2B type 1-F/J/L	H2bc15;H2bc8;H2bc9	5	0.225065	0.0514659	27.8974	27.6527	27.9428	27.7581	27.8973	27.5315	27.7389	27.6527
P41105	60S ribosomal protein L28	Rpl28	6	0.19936	0.0515074	22.6387	22.3831	22.6006	22.6386	22.6453	22.3348	22.5685	22.3831
Q2TPA8	Hydroxysteroid dehydrogenase-like protein 2	Hsdl2	27	-0.258205	0.0515653	24.3101	24.632	24.217	24.3578	24.3101	24.6431	24.3844	24.632
Q9CR29	Coiled-coil domain-containing protein 43	Ccdc43	1	-1.42301	0.0515675	17.4893	18.7987	17.4894	18.2922	16.5265	19.0346	18.7439	18.7987
Q8BL65	Actin-binding LIM protein 2	Ablim2	8	-0.724065	0.0517899	18.9545	19.6523	19.3387	18.7987	18.9545	19.6523	20.1581	19.4536
Q8BPE4	Transmembrane protein 177	Tmem177	7	-0.249896	0.0518011	20.5069	20.7796	20.5069	20.4972	20.6186	20.9388	20.654	20.7796
P63330	Serine/threonine-protein phosphatase 2A catalytic subunit alpha isoform	Ppp2ca	1	0.253085	0.05196	20.8269	20.6096	21.0292	20.714	20.8269	20.6096	20.5915	20.6096
Q6PE15	Palmitoyl-protein thioesterase ABHD10, mitochondrial	Abhd10	5	0.296845	0.0521113	21.8764	21.4676	21.8802	21.5777	21.8764	21.4676	21.417	21.5592
Q8K0P3	MTOR-associated protein MEAK7	Meak7	1	-1.92967	0.0521357	16.1089	18.5657	15.6026	16.1089	17.9024	18.5768	18.2604	18.5657
Q8CHT0	Delta-1-pyrroline-5-carboxylate dehydrogenase, mitochondrial	Aldh4a1	24	-0.0766525	0.0523106	24.558	24.6486	24.6096	24.558	24.558	24.6486	24.6153	24.6918
Q9DBL7	Bifunctional coenzyme A synthase	Coasy	9	-0.19335	0.0523186	20.6453	20.8113	20.714	20.6453	20.6096	20.9742	20.8113	20.7634
Q9R0N0	Galactokinase	Galk1	8	0.144232	0.0523891	21.1395	20.9882	21.1395	21.1886	21.1395	20.9388	21.1079	20.9882
Q91Z31	Polypyrimidine tract-binding protein 2	Ptbp2	3	0.281795	0.0524221	19.1556	18.9373	19.1556	19.1432	19.3516	18.7987	19.0691	18.9373
Q0VG49	Uncharacterized protein C15orf61 homolog		1	1.87357	0.0524428	18.5545	16.786	18.5951	18.5545	18.1752	17.6096	16.786	15.3086
Q9JJW5	Myozenin-2	Myoz2	19	0.153575	0.0524562	26.632	26.5075	26.632	26.6998	26.604	26.5075	26.4008	26.5667
Q9CPY7	Cytosol aminopeptidase	Lap3	23	0.102247	0.0527668	23.4298	23.2961	23.3778	23.4551	23.4298	23.3778	23.2821	23.2961
Q99LC5	Electron transfer flavoprotein subunit alpha, mitochondrial	Etfa	21	-0.132292	0.0527796	28.7357	28.906	28.8142	28.7357	28.7162	28.9428	28.8142	28.906
Q9CY27	Very-long-chain enoyl-CoA reductase	Tecr	10	0.150403	0.0529368	22.8327	22.7327	22.8327	22.8152	22.8633	22.58	22.7471	22.7327
P09470	Angiotensin-converting enzyme	Ace	25	0.761052	0.0531759	21.7553	21.2066	21.6231	22.002	21.7553	21.2066	21.3645	20.5261
P35283	Ras-related protein Rab-12	Rab12	11	-0.105473	0.0531952	21.5498	21.6628	21.5685	21.5498	21.5117	21.6627	21.7013	21.5823
Q8R3F5	Malonyl-CoA-acyl carrier protein transacylase, mitochondrial	Mcat	8	0.270229	0.0533373	21.002	20.7389	21.002	21.1269	20.8727	20.8423	20.7389	20.6096
Q8CI78	Required for meiotic nuclear division protein 1 homolog	Rmnd1	7	-0.506907	0.0535583	20.2419	20.6364	19.8469	20.2419	20.3857	20.8423	20.6364	20.5165
Q9D710	Thioredoxin-related transmembrane protein 2	Tmx2	8	-0.117821	0.0535811	21.9207	22.0258	21.9207	21.9847	21.9061	22.1269	22.0122	22.0258
Q9DCN1	NAD-capped RNA hydrolase NUDT12	Nudt12	4	-0.601302	0.0536027	17.9258	18.4775	17.9258	17.417	17.9488	18.528	18.0899	18.4775
Q8VDP6	CDP-diacylglycerol--inositol 3-phosphatidyltransferase	Cdipt	5	0.228134	0.053653	22.6342	22.4324	22.5568	22.6342	22.6779	22.4324	22.5045	22.2477
P36993;P49443	Protein phosphatase 1B	Ppm1a;Ppm1b	3	0.127911	0.053731	21.6186	21.5213	21.5685	21.6757	21.6186	21.4221	21.5213	21.5356
P47963	60S ribosomal protein L13	Rpl13	11	0.146113	0.0537983	23.7077	23.5522	23.7077	23.6649	23.7286	23.5522	23.6431	23.4676
Q8R0X7	Sphingosine-1-phosphate lyase 1	Sgpl1	7	0.414858	0.0538191	19.9601	19.5011	19.9127	20.0426	19.9601	19.3321	19.8377	19.5011
Q91YD9	Neural Wiskott-Aldrich syndrome protein	Wasl	3	0.245185	0.0539221	19.343	19.0479	19.3815	19.1728	19.343	19.0479	19.1679	18.9459
P08113;P11499	Endoplasmin	Hsp90ab1;Hsp90b1	2	-0.184732	0.0541459	25.48	25.7024	25.48	25.4202	25.604	25.7492	25.7024	25.6068
P08556;Q61411	GTPase NRas	Hras;Nras	1	0.182698	0.0541812	20.7715	20.5545	20.7715	20.6886	20.7715	20.4576	20.5545	20.6714
O88533	Aromatic-L-amino-acid decarboxylase	Ddc	3	-0.489274	0.0542253	19.4795	19.8712	19.6903	19.1332	19.4795	19.8712	19.8175	20.0821
Q66JZ4	T-cell activation inhibitor, mitochondrial	TCAIM	5	-0.496092	0.0542371	19.9601	20.5165	20.2989	19.9601	19.7553	20.654	20.5165	20.3321
P61255	60S ribosomal protein L26	Rpl26	9	0.166125	0.0542912	23.8764	23.6971	23.8764	23.8191	23.8764	23.6971	23.7895	23.5869
Q9CY50	Translocon-associated protein subunit alpha	Ssr1	4	-0.173864	0.054319	21.9061	22.0918	21.9061	21.8913	21.9916	22.0122	22.2066	22.0918
Q922Q8	Leucine-rich repeat-containing protein 59	Lrrc59	4	0.278903	0.0544366	21.823	21.6584	21.7796	21.823	22.0359	21.6584	21.6757	21.4676
O54988	STE20-like serine/threonine-protein kinase	Slk	23	-0.16964	0.0545318	20.0691	20.2185	20.1457	20.0691	19.9316	20.2066	20.2185	20.2302
O88952	Protein lin-7 homolog C	Lin7c	5	0.169045	0.0547575	20.8191	20.6453	20.8191	20.7056	20.8802	20.6453	20.5638	20.6886
Q9D1I2	Caspase recruitment domain-containing protein 19	Card19	4	0.339783	0.0547944	20.8727	20.5165	20.8727	20.9171	20.5823	20.5165	20.5261	20.3101
Q69ZP3	Probable hydrolase PNKD	Pnkd	1	-0.347203	0.0549046	17.6731	18.0585	17.6731	17.5049	17.9258	18.1155	17.9714	18.0585
Q9Z2I9	Succinate--CoA ligase [ADP-forming] subunit beta, mitochondrial	Sucla2	36	-0.123284	0.0550855	27.1015	27.2353	27.0914	27.1015	27.1115	27.2354	27.141	27.2979
P68510	14-3-3 protein eta	Ywhah	8	0.185334	0.0551043	23.2155	23.0156	23.1379	23.2434	23.2155	23.0156	23.119	22.9061
Q8C3X4	Translation factor Guf1, mitochondrial	Guf1	12	-0.273548	0.055141	20.4874	20.8191	20.417	20.4874	20.7471	20.8191	20.8576	20.7955
Q80W47	WD repeat domain phosphoinositide-interacting protein 2	Wipi2	2	1.45236	0.0551555	18.1104	16.5387	17.7667	18.1104	18.2326	16.5387	15.7013	17.5127
Q9CQV8	14-3-3 protein beta/alpha	Ywhab	6	0.1115	0.0551813	22.9171	22.7935	22.8538	22.9171	22.9707	22.7935	22.8481	22.7655
Q9JIM1	Equilibrative nucleoside transporter 1	Slc29a1	3	-0.29172	0.0551931	20.5915	20.8727	20.7471	20.4676	20.5915	20.7796	21.0292	20.8727
Q80U93	Nuclear pore complex protein Nup214	Nup214	4	0.534808	0.0552287	18.9287	18.4087	18.9287	18.6523	19.2442	18.4087	18.5842	18.2279
Q9ESW4	Acylglycerol kinase, mitochondrial	Agk	15	-0.0701173	0.0552495	22.8746	22.937	22.8689	22.8987	22.8745	22.9985	22.937	22.9171
P02463	Collagen alpha-1(IV) chain	Col4a1	4	0.36521	0.055352	22.895	22.5522	23.1734	22.8745	22.895	22.5522	22.8054	22.4898
P35123	Ubiquitin carboxyl-terminal hydrolase 4	Usp4	7	-0.228956	0.055414	19.0211	19.1874	18.7796	19.0453	19.0211	19.1874	19.1898	19.1556
P63101;Q9CQV8	14-3-3 protein zeta/delta	Ywhab;Ywhaz	1	-0.463748	0.0558662	18.1605	18.7039	18.4415	18.1605	17.9141	18.7039	18.734	18.4696
Q64511	DNA topoisomerase 2-beta	Top2b	20	0.306298	0.0559058	20.8423	20.4375	20.8423	20.7796	20.9171	20.4273	20.7553	20.4375
Q8CG76	Aflatoxin B1 aldehyde reductase member 2	Akr7a2	15	-0.132988	0.0560019	23.4298	23.5522	23.4298	23.4425	23.3239	23.5754	23.4676	23.5522
Q9JKL5	Calcineurin B homologous protein 3	Tesc	2	1.40229	0.0560937	19.3211	18.2466	19.185	19.3211	19.6258	18.2466	16.9882	18.6903
P16015	Carbonic anhydrase 3	Ca3	7	-1.10173	0.056096	19.3667	20.3962	18.5204	19.3667	19.6006	19.778	20.3962	20.6186
Q8BK64	Activator of 90 kDa heat shock protein ATPase homolog 1	Ahsa1	17	-0.141947	0.056182	22.6431	22.7348	22.5823	22.6431	22.6606	22.7119	22.8651	22.7348
Q9JHQ5	Leucine zipper transcription factor-like protein 1	Lztfl1	3	0.791338	0.0564121	18.7764	17.8545	18.8876	18.3667	18.7764	18.3365	17.8545	17.4656
Q505F5	Leucine-rich repeat-containing protein 47	Lrrc47	11	0.161266	0.0564455	20.8802	20.6628	20.8802	20.8269	20.895	20.6364	20.8191	20.6627
P39688;Q04736	Tyrosine-protein kinase Fyn	Fyn;Yes1	4	0.292985	0.0566072	20.4576	20.0559	20.4576	20.4576	20.3645	20.343	20.002	20.0559
P60867	40S ribosomal protein S20	Rps20	5	0.157243	0.0566103	22.7655	22.5961	22.7265	22.7655	22.8093	22.5961	22.7098	22.5237
Q9CQ91	NADH dehydrogenase [ubiquinone] 1 alpha subcomplex subunit 3	Ndufa3	5	-0.267543	0.0567697	24.4041	24.7745	24.3511	24.6153	24.4041	24.7945	24.604	24.7746
P62960;Q9JKB3;Q9Z2C8	Y-box-binding protein 1	Ybx1;Ybx2;Ybx3	3	0.216778	0.0568944	21.1206	20.953	21.1946	21.1206	21.0821	20.7715	21.0224	20.9531
Q3UHD3	Microtubule-associated tumor suppressor candidate 2 homolog	Mtus2	7	-0.552787	0.0570132	18.9459	19.6435	18.9459	18.7987	19.417	19.4293	19.7471	19.6435
P32020	Sterol carrier protein 2	Scp2	22	-0.307453	0.0570593	23.6209	23.8764	23.6431	23.5983	23.6209	23.8764	23.7594	24.1488
P62259	14-3-3 protein epsilon	Ywhae	24	0.142022	0.0570745	25.3712	25.2463	25.3712	25.3307	25.3844	25.1214	25.2926	25.2463
Q924X2	Carnitine O-palmitoyltransferase 1, muscle isoform	Cpt1b	35	-0.125019	0.0570949	25.895	26.0711	25.895	25.9225	25.8834	26.0711	25.9338	26.0711
Q9DBB8	Trans-1,2-dihydrobenzene-1,2-diol dehydrogenase	Dhdh	8	-0.189899	0.0573454	22.882	23.0376	22.9566	22.882	22.7634	23.1426	23.0376	22.9916
P15508;Q62261	Spectrin beta chain, erythrocytic	Sptb;Sptbn1	5	0.186456	0.0575378	22.9079	22.6562	22.8113	22.9079	22.928	22.6562	22.8152	22.6164
Q80Y55	BSD domain-containing protein 1	Bsdc1	1	2.03031	0.0575498	17.9658	15.7577	18.9854	17.4004	17.9658	15.2282	15.7577	17.2748
Q8BYL4	Tyrosine--tRNA ligase, mitochondrial	Yars2	11	-0.175606	0.0576263	21.4676	21.6971	21.4676	21.4526	21.502	21.7307	21.5213	21.6971
Q8VEL0	Motile sperm domain-containing protein 1	Mospd1	2	0.759285	0.0576914	20.1079	19.392	20.0156	20.1079	20.3211	19.3921	19.8606	18.9141
Q920Q6	RNA-binding protein Musashi homolog 2	Msi2	7	0.144941	0.0577394	22.7035	22.5915	22.7035	22.68	22.8481	22.5754	22.5915	22.6298
P97351	40S ribosomal protein S3a	Rps3a	15	0.131017	0.05777	24.1332	23.9933	24.0935	24.1332	24.1946	23.9495	24.0854	23.9933
P63323	40S ribosomal protein S12	Rps12	2	0.290916	0.0578412	23.1688	22.9334	23.1238	23.1688	23.3645	22.7836	22.9334	23.0674
Q99JT9	Acireductone dioxygenase	Adi1	2	1.17394	0.0579775	18.0743	17.1155	18.562	17.5582	18.0743	17.1155	16.2251	17.3321
Q04519	Sphingomyelin phosphodiesterase	Smpd1	5	-0.441695	0.0580021	19.8667	20.3211	20.0426	19.8666	19.6627	20.5069	20.3211	20.0691
Q9R0Q3	Transmembrane emp24 domain-containing protein 2	Tmed2	7	0.345135	0.0581018	21.502	21.0493	21.502	21.5638	21.3592	21.0493	21.3592	20.9812
P26040	Ezrin	Ezr	23	0.140684	0.0584254	22.3857	22.1916	22.3857	22.2933	22.4066	22.1916	22.1703	22.3017
Q9CR41	Huntingtin-interacting protein K	Hypk	4	0.265397	0.0585536	19.0873	18.7073	18.83	19.0873	19.0951	18.7072	18.8392	18.6697
P52825	Carnitine O-palmitoyltransferase 2, mitochondrial	Cpt2	34	-0.261536	0.0585821	25.417	25.6971	25.417	25.4457	25.3477	25.8118	25.4862	25.6971
Q9QXT0	Protein canopy homolog 2	Cnpy2	6	0.237199	0.0586355	21.0359	20.7634	20.9531	21.0359	21.1206	20.7634	20.9459	20.6886
P97315	Cysteine and glycine-rich protein 1	Csrp1	8	-0.265261	0.0587083	21.6628	21.9672	21.6627	21.502	21.7553	21.7675	21.9672	21.9812
Q3TMP8	Trimeric intracellular cation channel type A	Tmem38a	8	-0.152045	0.0587296	23.0037	23.1031	23.0037	22.8708	23.0309	23.0789	23.1031	23.1795
Q8R016	Bleomycin hydrolase	Blmh	6	-0.239122	0.0588025	21.6409	21.8307	21.6141	21.7348	21.6409	21.8307	21.8073	22.0691
Q70FJ1	A-kinase anchor protein 9	Akap9	4	-0.489645	0.0588034	16.2567	16.8238	16.2567	16.5234	16.0847	16.8238	16.9882	16.5219
O35143	ATPase inhibitor, mitochondrial	Atp5if1	6	0.26732	0.0590239	25.4614	25.2426	25.4298	25.4614	25.558	25.2426	25.0401	25.3645
Q60864	Stress-induced-phosphoprotein 1	Stip1	32	-0.139341	0.0590362	23.2521	23.3645	23.1395	23.2521	23.2821	23.3645	23.417	23.3101
P62918	60S ribosomal protein L8	Rpl8	9	0.110732	0.0590637	23.7695	23.654	23.7695	23.7492	23.8385	23.654	23.7389	23.632
Q6PER3;Q8R001	Microtubule-associated protein RP/EB family member 3	Mapre2;Mapre3	1	0.731809	0.0592652	19.0265	18.2558	19.0847	18.7699	19.0265	18.6697	18.2558	17.7602
O89020	Afamin	Afm	5	0.271148	0.0593411	20.7307	20.417	20.7223	20.8113	20.7307	20.3538	20.68	20.417
Q8VC65	Nurim	Nrm	2	0.690019	0.0596875	17.6937	17.185	17.6937	17.5508	17.9373	16.5687	17.3581	17.185
Q9EQG3	Sciellin	Scel	1	0.298086	0.0600908	19.0156	18.6132	18.7955	19.0156	19.1028	18.8113	18.6132	18.5951
Q80UP8	Sodium-dependent phosphate transporter 2	Slc20a2	6	0.370047	0.0602572	18.8606	18.606	18.8269	18.8606	18.8817	18.2042	18.606	18.6488
Q7TPR4;Q9JI91	Alpha-actinin-1	Actn1;Actn2	5	0.133957	0.0603267	28.1065	27.965	28.1065	28.1065	28.003	27.965	27.8623	27.9869
P62900	60S ribosomal protein L31	Rpl31	7	0.135811	0.0603819	24.3511	24.239	24.317	24.3511	24.3778	24.239	24.2821	24.1174
Q9CQP2	Trafficking protein particle complex subunit 2	Trappc2	2	-0.633265	0.0603841	19.9742	20.3962	19.5451	20.1946	19.9742	20.3752	20.3962	20.8423
Q5SWU9	Acetyl-CoA carboxylase 1	Acaca	3	0.87196	0.0605309	17.9658	16.9083	17.9658	18.1655	17.7731	17.714	16.9083	16.6662
Q9JLZ3	Methylglutaconyl-CoA hydratase, mitochondrial	Auh	12	-0.156813	0.0605557	24.9847	25.1565	25.0854	24.9847	24.8858	25.1565	25.1055	25.1642
Q8R127	Saccharopine dehydrogenase-like oxidoreductase	Sccpdh	12	0.146267	0.0605628	23.2821	23.155	23.2678	23.2821	23.2961	23.155	23.0309	23.2214
P12382;P47857;Q9WUA3	ATP-dependent 6-phosphofructokinase, liver type	Pfkl;Pfkm;Pfkp	3	-0.0991408	0.0606	24.5045	24.5983	24.5812	24.5045	24.4676	24.654	24.5983	24.5983
O08709	Peroxiredoxin-6	Prdx6	18	-0.100583	0.0606759	25.6865	25.8215	25.6811	25.7746	25.6865	25.8528	25.8215	25.7695
P68372;P99024;Q7TMM9;Q9CWF2;Q9D6F9	Tubulin beta-4B chain	Tubb2a;Tubb2b;Tubb4a;Tubb4b;Tubb5	7	0.115951	0.0608254	26.1234	26.0084	26.1035	26.1814	26.1234	26.0084	26.0914	25.9606
Q9DCT2	NADH dehydrogenase [ubiquinone] iron-sulfur protein 3, mitochondrial	Ndufs3	18	-0.126303	0.0608726	27.6865	27.8324	27.7129	27.6181	27.6865	27.8324	27.7195	27.8445
Q8R0F8	Acylpyruvase FAHD1, mitochondrial	Fahd1	10	-0.169148	0.061097	22.7056	22.9061	22.7348	22.7056	22.6843	22.9061	22.7553	22.9707
Q9DB29	Isoamyl acetate-hydrolyzing esterase 1 homolog	Iah1	5	0.527454	0.0612282	20.2989	19.9882	20.2989	20.5261	20.265	20.0559	19.9882	19.4636
Q6ZWQ0;Q6ZWR6	Nesprin-2	Syne1;Syne2	2	0.301118	0.0612885	19.1231	18.7106	18.9229	19.1231	19.1801	18.7106	18.9459	18.6662
Q68FF6	ARF GTPase-activating protein GIT1	Git1	5	0.245405	0.0613354	19.2809	19.0743	19.1581	19.2809	19.4004	18.9083	19.0743	19.1206
Q99MR9	Protein phosphatase 1 regulatory subunit 3A	Ppp1r3a	28	-0.178179	0.0617157	21.2933	21.4425	21.2933	21.3645	21.1581	21.5117	21.3962	21.4425
P58064	28S ribosomal protein S6, mitochondrial	Mrps6	8	0.198202	0.0617589	19.7764	19.5545	19.692	19.8175	19.7764	19.4516	19.5545	19.6852
Q99LB7	Sarcosine dehydrogenase, mitochondrial	Sardh	2	0.424876	0.0618022	18.624	18.0795	18.4576	18.624	18.6903	18.4576	18.0795	17.9601
Q6ZWU9;Q6ZWY3	40S ribosomal protein S27	Rps27;Rps27l	1	0.174424	0.06196	22.0526	21.9207	22.019	22.0526	22.2155	21.8689	21.9207	21.9742
Q8K4K6	Pantothenate kinase 1	Pank1	1	-0.711521	0.0619951	15.5805	16.2823	16.0847	15.3127	15.5805	16.6806	16.2823	16.1497
Q9DCN2	NADH-cytochrome b5 reductase 3	Cyb5r3	17	0.398412	0.0620805	24.1565	23.8093	24.1565	24.1871	23.9672	23.8764	23.8093	23.4298
P62911	60S ribosomal protein L32	Rpl32	5	0.2288	0.0623292	22.1015	21.823	22.1332	21.9424	22.1015	21.823	21.9495	21.7182
Q7TSQ8	Pyruvate dehydrogenase phosphatase regulatory subunit, mitochondrial	Pdpr	21	0.118935	0.062365	21.6409	21.5213	21.6757	21.5961	21.6409	21.5213	21.5869	21.4476
Q9DC11	Plexin domain-containing protein 2	Plxdc2	2	0.360849	0.0624353	18.4576	18.1104	18.4576	18.4375	18.6627	17.977	18.3879	18.1104
P62631	Elongation factor 1-alpha 2	Eef1a2	16	-0.0862064	0.0625013	25.8069	25.8834	25.7389	25.8528	25.8069	25.8973	25.8834	25.8764
P16858	Glyceraldehyde-3-phosphate dehydrogenase	Gapdh	4	0.658827	0.0626388	26.0484	25.4551	25.8336	26.0484	26.3101	25.0062	25.7543	25.4551
Q8BHF7	CDP-diacylglycerol--glycerol-3-phosphate 3-phosphatidyltransferase, mitochondrial	Pgs1	3	0.627926	0.0626424	20.343	19.5489	20.343	20.5823	20.2185	20.1946	19.5489	19.5165
Q9D4H1	Exocyst complex component 2	Exoc2	6	0.368652	0.0626872	19.3645	18.9714	19.6096	19.3645	19.3321	19.2945	18.9714	18.9344
P47934	Carnitine O-acetyltransferase	Crat	33	-0.151639	0.0627838	25.7645	25.976	25.8741	25.7645	25.7208	25.976	25.8623	25.976
Q91W69	Epsin-3	Epn3	1	0.241287	0.0628403	18.4972	18.2419	18.606	18.4972	18.417	18.1457	18.4087	18.2419
Q566J8	Atypical kinase COQ8B, mitochondrial	Coq8b	2	0.510387	0.0629088	19.265	18.8207	19.265	19.29	19.1357	18.8207	18.3452	18.9937
Q8VHI3	GDP-fucose protein O-fucosyltransferase 2	Pofut2	1	1.38736	0.0630307	20.2535	18.6558	20.3211	20.2535	20.2302	18.6558	18.0743	19.9127
Q8K2C9	Very-long-chain (3R)-3-hydroxyacyl-CoA dehydratase 3	Hacd3	5	0.187243	0.0631291	20.654	20.4874	20.5261	20.7307	20.654	20.3645	20.4972	20.4874
O55003	BCL2/adenovirus E1B 19 kDa protein-interacting protein 3	Bnip3	4	-0.346409	0.0632287	18.9024	19.2302	19.0506	18.9024	18.7106	19.3983	19.2302	19.0743
Q5EG47;Q8BRK8	5'-AMP-activated protein kinase catalytic subunit alpha-1	Prkaa1;Prkaa2	2	0.44654	0.0632737	20.9316	20.6453	20.8499	21.0951	20.9316	20.1946	20.6453	20.6971
P50136	2-oxoisovalerate dehydrogenase subunit alpha, mitochondrial	Bckdha	20	-0.151934	0.0633725	23.8385	23.9672	23.8288	23.8385	23.867	23.9672	23.9134	24.1095
Q9Z0P5	Twinfilin-2	Twf2	11	0.160094	0.0634113	21.6929	21.5213	21.6928	21.7013	21.5592	21.5451	21.5213	21.4066
O88447	Kinesin light chain 1	Klc1	8	-0.25345	0.0634496	20.0559	20.2764	19.9742	20.1581	20.0559	20.1946	20.4775	20.2764
Q9D154	Leukocyte elastase inhibitor A	Serpinb1a	21	1.24151	0.0640075	22.7161	21.6051	23.1503	22.7161	22.1825	22.0393	21.6051	20.68
P16627	Heat shock 70 kDa protein 1-like	Hspa1l	6	0.602727	0.0640732	22.1015	21.4118	22.1015	21.9847	22.4041	21.3101	21.9601	21.4118
P62317	Small nuclear ribonucleoprotein Sm D2	Snrpd2	4	0.38403	0.0640801	22.0426	21.6971	21.9388	22.0426	22.2155	21.4526	21.895	21.6971
Q91YY4	ATP synthase mitochondrial F1 complex assembly factor 2	Atpaf2	10	-0.191293	0.0642368	21.3805	21.6006	21.3484	21.3805	21.5592	21.5685	21.6006	21.6928
Q05BC3	Echinoderm microtubule-associated protein-like 1	Eml1	18	0.0707397	0.0643273	22.391	22.3484	22.391	22.3831	22.4501	22.3619	22.3484	22.3017
Q61337	Bcl2-associated agonist of cell death	Bad	2	0.498934	0.0644153	19.4496	18.7987	18.9964	19.4656	19.4496	19.0211	18.5951	18.7987
Q640L3	Cell cycle progression protein 1	Ccpg1	1	1.85497	0.0646186	16.0405	15.0743	15.9385	16.0405	17.2991	13.3987	15.2401	15.0743
Q8BG67	Protein EFR3 homolog A	Efr3a	14	0.294361	0.0649622	20.5069	20.2535	20.5069	20.654	20.3211	20.2535	20.2764	20.0691
Q80WJ7	Protein LYRIC	Mtdh	11	0.191306	0.064969	21.5213	21.2821	21.4221	21.5404	21.5213	21.2006	21.4273	21.2821
O08807;P35700	Peroxiredoxin-4	Prdx1;Prdx4	2	-0.224404	0.0649753	25.2317	25.4041	25.3101	25.2133	25.2317	25.3811	25.6431	25.4041
Q9JKY7	Cytochrome P450	Cyp2d22	6	0.522088	0.0652725	19.6132	19.2349	19.8253	19.6132	19.4636	19.2349	19.3408	18.7602
P70168	Importin subunit beta-1	Kpnb1	27	0.152967	0.0655333	22.3045	22.2066	22.3045	22.2905	22.4451	22.2066	22.2477	22.1269
P61982;P62259;P63101;P68254;P68510;Q9CQV8	14-3-3 protein gamma	Ywhab;Ywhae;Ywhag;Ywhah;Ywhaq;Ywhaz	1	0.337262	0.0655788	25.5983	25.2821	25.5983	25.7796	25.3811	25.3477	25.2821	25.1174
Q61699	Heat shock protein 105 kDa	Hsph1	17	-0.369558	0.0655869	21.0559	21.502	20.8651	21.0886	21.0559	21.502	21.502	21.1143
Q01405	Protein transport protein Sec23A	Sec23a	13	0.220758	0.0655893	21.6929	21.4324	21.5777	21.6928	21.7594	21.4324	21.5869	21.3484
Q9D8V0	Minor histocompatibility antigen H13	Hm13	2	-0.610984	0.065657	19.8438	20.4476	19.5508	19.8438	19.9882	20.4476	20.7389	20.0292
P50431	Serine hydroxymethyltransferase, cytosolic	Shmt1	1	1.22594	0.0657226	17.9882	17.0743	17.6523	18.2787	17.9882	17.3145	17.0743	15.8525
Q64310	Surfeit locus protein 4	Surf4	10	0.19307	0.066193	23.6971	23.5045	23.6431	23.7796	23.6971	23.4041	23.632	23.5045
Q8K2H2	Deubiquitinase OTUD6B	Otud6b	3	0.250863	0.0662369	19.8591	19.528	19.9287	19.8591	19.615	19.5108	19.528	19.6114
P16283	Anion exchange protein 3	Slc4a3	6	-0.548066	0.0662495	18.4854	19.0899	18.4375	18.4854	18.6627	18.7106	19.4293	19.0899
Q9WU84	Copper chaperone for superoxide dismutase	Ccs	2	0.216501	0.0662698	20.2877	19.9882	20.2877	20.2185	20.3101	19.9882	19.9601	20.2185
Q9CZ83	39S ribosomal protein L55, mitochondrial	Mrpl55	5	-0.162631	0.0665167	21.6757	21.7915	21.6141	21.7512	21.6757	21.7915	21.7915	21.9459
Q9CPR4	60S ribosomal protein L17	Rpl17	6	0.143364	0.0665644	23.2961	23.1871	23.2821	23.2961	23.3778	23.1871	23.2535	23.0854
P62137	Serine/threonine-protein phosphatase PP1-alpha catalytic subunit	Ppp1ca	4	0.155758	0.0666223	21.7634	21.6231	21.7634	21.7182	21.7755	21.6231	21.6843	21.4825
Q149B8	PGC-1 and ERR-induced regulator in muscle protein 1	Perm1	17	0.112975	0.0666248	22.0054	21.8839	21.9985	22.0054	22.0122	21.8839	21.8191	21.9742
O08749	Dihydrolipoyl dehydrogenase, mitochondrial	Dld	24	-0.134483	0.0666338	26.5624	26.726	26.5725	26.5419	26.5624	26.726	26.5898	26.7645
Q9CYV5	Transmembrane protein 135	Tmem135	2	-1.28232	0.0666512	18.0691	19.1605	18.6523	18.0691	16.9083	19.1679	19.1605	19.1482
Q69ZW3;Q99MS7	EH domain-binding protein 1	Ehbp1;Ehbp1l1	1	0.390779	0.0666754	20.2302	19.7422	20.3857	20.2302	20.0951	19.6886	20.1079	19.7422
C0HKE1;C0HKE2;C0HKE3;C0HKE4;C0HKE5;C0HKE6;C0HKE7;C0HKE8;C0HKE9;Q64523;Q6GSS7;Q8BFU2;Q8CGP5;Q8CGP6;Q8CGP7	Histone H2A type 1-B	H2ac11;H2ac12;H2ac13;H2ac15;H2ac20;H2ac4;H2ac6;H2ac7;H2ac8;H2aw;Hist1h2af;Hist1h2an;Hist1h2ao;Hist1h2ap;Hist2h2aa2	1	0.160182	0.0666768	28.9259	28.7031	28.94	28.8593	28.9259	28.7031	28.8653	28.6764
P70698	CTP synthase 1	Ctps1	12	0.328803	0.066714	19.8965	19.6222	19.8965	20.002	19.8876	19.8066	19.6222	19.3709
Q91YI0	Argininosuccinate lyase	Asl	11	0.545067	0.0668636	20.343	19.7602	20.343	20.5451	20.2419	19.528	20.2066	19.7602
Q9CR62	Mitochondrial 2-oxoglutarate/malate carrier protein	Slc25a11	22	-0.0824744	0.0670177	27.673	27.7771	27.7195	27.6458	27.673	27.7771	27.7129	27.7958
Q8CCS6	Polyadenylate-binding protein 2	Pabpn1	1	0.412868	0.0670231	20.9882	20.714	20.9882	21.1946	20.9812	20.714	20.8576	20.3538
Q3UHD6	Sorting nexin-27	Snx27	5	0.353121	0.0670419	20.343	20.002	20.343	20.2185	20.4676	20.1946	20.002	19.7731
Q99P88	Nuclear pore complex protein Nup155	Nup155	13	0.291217	0.0670612	19.8408	19.4556	19.9316	19.6329	19.8408	19.4149	19.661	19.4556
Q9EPE9	Endoplasmic reticulum transmembrane helix translocase	Atp13a1	6	0.314259	0.0671528	19.6453	19.3581	19.6453	19.7602	19.4676	19.1307	19.3581	19.4415
Q9ET54	Palladin	Palld	27	-0.106024	0.0671995	21.1946	21.3211	21.1457	21.2593	21.1946	21.2535	21.343	21.3211
Q91YP0	L-2-hydroxyglutarate dehydrogenase, mitochondrial	L2hgdh	17	-0.104759	0.0672015	22.0426	22.1174	22.0756	22.0426	22.0292	22.2332	22.1174	22.1111
Q9D8B6	Protein FAM210B, mitochondrial	Fam210b	2	0.399352	0.0673629	18.2604	17.8484	18.4815	18.2604	18.1155	17.8484	17.7005	18.1104
Q9CXW4	60S ribosomal protein L11	Rpl11	5	0.149762	0.0674457	23.5638	23.4041	23.5638	23.4923	23.654	23.3645	23.4923	23.4041
O55142	60S ribosomal protein L35a	Rpl35a	7	0.142871	0.0675097	22.9261	22.7634	22.8423	22.9261	23.0088	22.7634	22.8442	22.741
Q61207	Prosaposin	Psap	4	-0.354257	0.067531	19.8651	20.1704	19.5299	19.8651	19.9601	20.2185	20.0292	20.1703
Q99LH2	Phosphatidylserine synthase 1	Ptdss1	3	-0.144606	0.0675515	20.9171	21.0224	20.7634	20.9171	20.9316	21.0224	20.9742	21.0493
A0A075B5R2;A0A075B5R3	Immunoglobulin heavy variable 7-3 (Fragment)	Ighv7-2;Ighv7-3	1	1.14576	0.0677733	19.3299	18.7173	19.8861	19.1874	19.3299	18.7439	18.7173	17.5049
Q9QZS3	Protein numb homolog	Numb	2	0.436876	0.0679249	18.606	18.1898	18.8936	18.606	18.5508	18.1898	18.5127	18.0373
Q5SYD0	Unconventional myosin-Id	Myo1d	13	0.149575	0.0681747	20.0559	19.92	20.1332	19.9601	20.0559	19.92	19.9459	19.8346
P61982	14-3-3 protein gamma	Ywhag	8	0.155619	0.0681953	23.8576	23.7286	23.8576	23.895	23.8093	23.7286	23.7796	23.5869
Q7TPR4	Alpha-actinin-1	Actn1	25	0.302545	0.0682628	22.7327	22.3403	22.8288	22.7327	22.7077	22.3403	22.6865	22.3348
Q8BXK9	Chloride intracellular channel protein 5	Clic5	7	0.227575	0.0683017	22.7735	22.4651	22.7895	22.7735	22.7307	22.4651	22.7161	22.4298
P19253	60S ribosomal protein L13a	Rpl13a	8	0.194747	0.0685273	23.1457	22.8932	23.0088	23.1734	23.1457	22.823	23.0275	22.8932
Q9JHU9	Inositol-3-phosphate synthase 1	Isyna1	8	-0.444916	0.0685505	20.4273	20.9672	20.4273	20.4273	20.5731	20.6006	21.1946	20.9672
P30416	Peptidyl-prolyl cis-trans isomerase FKBP4	Fkbp4	27	-0.254007	0.0686165	21.9388	22.2419	21.8073	21.9777	21.9388	22.2419	22.2593	21.9847
O88986	2-amino-3-ketobutyrate coenzyme A ligase, mitochondrial	Gcat	4	-0.581578	0.0686232	19.6714	19.9742	19.7569	19.1679	19.6714	19.9742	20.4066	19.9601
Q9CWI3	BRCA2 and CDKN1A-interacting protein	Bccip	3	0.436103	0.0687878	18.9909	18.5242	18.9909	19.0346	18.8018	18.5242	18.7764	18.2185
Q78JW9	Ubiquitin domain-containing protein UBFD1	Ubfd1	2	0.275268	0.0687956	20.5915	20.2764	20.654	20.4375	20.5915	20.1332	20.4476	20.2764
Q9ES82	Popeye domain-containing protein 2	Popdc2	7	0.187115	0.0687989	23.48	23.3511	23.417	23.5045	23.48	23.1379	23.3511	23.3511
P09602	Non-histone chromosomal protein HMG-17	Hmgn2	3	0.305709	0.068855	23.1047	22.7995	23.1581	23.1047	23.0393	22.5869	22.9985	22.7995
Q8CCM6	Mitochondrial import inner membrane translocase subunit Tim21	Timm21	6	-0.142508	0.0689424	22.2792	22.3831	22.3266	22.2792	22.2302	22.3592	22.3831	22.5213
Q9WU28	Prefoldin subunit 5	Pfdn5	3	0.739918	0.0689702	17.7471	17.1655	18.1457	17.6662	17.7471	17.1655	16.6382	17.5356
Q60854	Serpin B6	Serpinb6	21	0.41949	0.0690983	24.4425	24.1795	24.5285	24.4425	24.3511	24.1795	24.1871	23.6971
Q9D7X8	Gamma-glutamylcyclotransferase	Ggct	6	-0.127216	0.0692677	20.8191	20.9882	20.7955	20.8727	20.8191	20.9882	20.8651	21.0156
Q8BXV2	BRI3-binding protein	Bri3bp	3	-0.117348	0.0693518	20.5915	20.7389	20.6886	20.5823	20.5915	20.7389	20.7955	20.68
P54754;P54761	Ephrin type-B receptor 3	Ephb3;Ephb4	1	0.447274	0.0695629	18.8144	18.5049	18.8144	19.0373	18.7699	18.6593	18.5049	18.1155
P03888	NADH-ubiquinone oxidoreductase chain 1	Mtnd1	9	-0.120234	0.0700862	25.9248	26.0691	25.8858	25.9383	25.9248	26.0691	25.945	26.0955
P19536	Cytochrome c oxidase subunit 5B, mitochondrial	Cox5b	11	-0.178604	0.0701064	24.8764	25.0894	24.7995	25.0443	24.8764	25.0975	25.0691	25.0894
P51432	1-phosphatidylinositol 4,5-bisphosphate phosphodiesterase beta-3	Plcb3	2	-0.396002	0.0701088	18.0319	18.2558	18.0638	17.5878	18.0319	18.3879	18.2558	18.2279
Q8BZI0	Actin filament-associated protein 1-like 1	Afap1l1	3	0.592088	0.0702449	18.4815	17.9024	18.3321	18.7731	18.4815	18.3056	17.9024	17.6024
Q3U7R1	Extended synaptotagmin-1	Esyt1	26	0.24578	0.07033	21.2764	21.002	21.2764	21.2593	21.3156	21.002	21.2244	20.8876
Q8CI94	Glycogen phosphorylase, brain form	Pygb	40	-0.0770906	0.0703787	25.9383	25.9955	25.9066	25.9383	25.9473	25.9955	25.965	26.0629
Q9CPR1	RWD domain-containing protein 4	Rwdd4	2	0.418929	0.0705876	18.9024	18.6488	18.8965	18.9024	19.1507	18.6488	18.2741	18.7699
Q9Z108	Double-stranded RNA-binding protein Staufen homolog 1	Stau1	2	0.722663	0.0705911	18.5049	17.9024	18.6937	18.4696	18.5049	17.9024	17.3056	18.2922
Q9Z2V5	Histone deacetylase 6	Hdac6	2	0.531034	0.0707826	19.5988	19.0506	19.5988	19.1382	19.6364	18.6347	19.0506	19.0951
Q9CQU0	Thioredoxin domain-containing protein 12	Txndc12	3	0.419547	0.0707988	20.714	20.417	20.6006	20.714	20.9951	20.5261	20.417	20.1079
Q8K2V6	Importin-11	Ipo11	1	0.713095	0.0708499	18.9054	18.0847	19.2877	18.7439	18.9054	18.7471	18.0847	17.9658
P47754	F-actin-capping protein subunit alpha-2	Capza2	9	-0.0830212	0.0708606	23.9933	24.0854	23.9933	23.9847	24.0105	24.0854	24.019	24.1332
Q9D7B6	Isobutyryl-CoA dehydrogenase, mitochondrial	Acad8	15	-0.0969817	0.0709785	23.6649	23.7995	23.6431	23.6865	23.6649	23.7995	23.6865	23.7995
Q9ES97	Reticulon-3	Rtn3	3	0.0706151	0.0709969	23.3511	23.2961	23.3511	23.3778	23.3376	23.2346	23.3239	23.2961
Q9JMH6	Thioredoxin reductase 1, cytoplasmic	Txnrd1	15	-0.0957006	0.0710548	22.2096	22.2707	22.1673	22.2096	22.2361	22.3672	22.2707	22.2621
P25911;P39688;Q04736	Tyrosine-protein kinase Lyn	Fyn;Lyn;Yes1	1	0.426034	0.0710758	21.0426	20.7796	20.9812	21.0426	21.1519	20.8191	20.7796	20.2989
Q9R069	Basal cell adhesion molecule	Bcam	15	-0.0973155	0.0712156	22.6119	22.7203	22.6342	22.5615	22.6119	22.6342	22.7203	22.7451
Q9JII6	Aldo-keto reductase family 1 member A1	Akr1a1	16	0.16751	0.0712404	22.4972	22.3831	22.4898	22.4972	22.538	22.3831	22.4298	22.2096
Q8R1V4	Transmembrane emp24 domain-containing protein 4	Tmed4	5	0.234755	0.0713068	21.0951	20.85	21.0088	21.2877	21.0951	20.8423	20.9951	20.8499
Q9CZL5	Pterin-4-alpha-carbinolamine dehydratase 2	Pcbd2	3	-0.109079	0.0713304	21.0493	21.1581	20.9882	21.0493	21.0951	21.2066	21.1581	21.0951
O89079	Coatomer subunit epsilon	Cope	3	0.506332	0.0715505	20.7553	20.3962	20.7553	20.5823	20.9388	20.4676	20.3962	19.8936
O35643	AP-1 complex subunit beta-1	Ap1b1	17	0.158129	0.0716128	21.4626	21.2477	21.4626	21.4066	21.5117	21.417	21.2477	21.2419
P17182;P17183	Alpha-enolase	Eno1;Eno2	1	0.260652	0.0718376	24.3444	24.0275	24.1642	24.4551	24.3443	23.9672	24.0275	24.1871
Q8R550	SH3 domain-containing kinase-binding protein 1	Sh3kbp1	8	-0.323115	0.071884	20.0951	20.4273	19.895	20.1079	20.0951	20.4273	20.5069	20.1332
P70353	Nuclear transcription factor Y subunit gamma	Nfyc	1	0.425175	0.0719235	19.0265	18.6417	19.2326	19.0265	18.9459	18.6417	18.9083	18.3794
Q8K2I1	Protein farnesyltransferase subunit beta	Fntb	2	0.599147	0.0721789	20.0691	19.547	20.002	20.0691	20.1332	19.547	19.8469	19.0129
Q64674	Spermidine synthase	Srm	5	0.471433	0.0721974	21.1825	20.68	21.2006	21.0493	21.1825	20.343	20.9951	20.68
Q9DBR3	Armadillo repeat-containing protein 8	Armc8	2	0.96537	0.0722721	19.7073	18.3101	19.729	19.2604	19.7072	18.1605	18.3101	19.3299
Q8CGY8	UDP-N-acetylglucosamine--peptide N-acetylglucosaminyltransferase 110 kDa subunit	Ogt	13	-0.215274	0.0723388	19.8876	20.1332	19.8876	19.8606	19.901	19.9316	20.1332	20.2302
P60843	Eukaryotic initiation factor 4A-I	Eif4a1	10	0.0860596	0.0723692	22.9725	22.8969	22.928	22.9725	23.0156	22.8969	22.9225	22.8385
Q9D1F4	Proline-rich AKT1 substrate 1	Akt1s1	1	-0.46403	0.0725205	18.2419	18.8207	18.0532	18.6869	18.2419	18.7173	18.8207	18.8361
P20444	Protein kinase C alpha type	Prkca	4	0.82395	0.0725447	20.4476	19.8727	20.8269	20.4476	20.3538	19.8727	20.1581	19.1257
Q9CQH7	Transcription factor BTF3 homolog 4	Btf3l4	6	0.189617	0.0726106	21.7471	21.4972	21.6051	21.7471	21.7634	21.4221	21.6276	21.4972
Q922D8	C-1-tetrahydrofolate synthase, cytoplasmic	Mthfd1	30	0.142829	0.0726894	21.7836	21.6006	21.8269	21.7348	21.7836	21.6006	21.743	21.5731
A0A075B5L0	Immunoglobulin kappa variable 10-95	Igkv10-95	2	0.564395	0.0727198	19.9882	19.417	20.2185	19.9601	19.9882	19.901	19.417	19.1556
Q5M8N0	CB1 cannabinoid receptor-interacting protein 1	Cnrip1	2	0.426226	0.0727291	18.2787	17.6662	18.1053	18.3277	18.2787	17.6662	18.1357	17.6311
Q99JY0	Trifunctional enzyme subunit beta, mitochondrial	Hadhb	43	-0.169144	0.0727457	28.6595	28.9031	28.7453	28.6595	28.6285	28.9031	28.726	28.9117
Q6PI62	Probable G-protein coupled receptor 173	Gpr173	1	1.29224	0.0727939	18.7106	17.2787	18.68	18.7106	18.8787	18.4616	16.6523	17.2787
Q9CXZ1	NADH dehydrogenase [ubiquinone] iron-sulfur protein 4, mitochondrial	Ndufs4	12	-0.137457	0.0727994	26.604	26.7517	26.604	26.604	26.5898	26.7518	26.632	26.8264
Q9CQV6	Microtubule-associated proteins 1A/1B light chain 3B	Map1lc3b	1	-0.13941	0.0728317	19.6714	19.7828	19.6714	19.7039	19.668	19.7828	19.9316	19.7471
Q9JI91	Alpha-actinin-2	Actn2	59	0.114889	0.0730808	28.509	28.4154	28.509	28.5463	28.4591	28.4154	28.3109	28.4433
Q60590	Alpha-1-acid glycoprotein 1	Orm1	2	0.501618	0.0730865	21.1946	20.6364	21.1079	21.4375	21.1946	20.4972	21.1015	20.6364
Q62084	Protein phosphatase 1 regulatory subunit 14B	Ppp1r14b	2	1.28664	0.0732919	18.0426	16.7602	18.0426	16.9316	18.209	16.8238	15.7393	16.7602
P07758;Q00897	Alpha-1-antitrypsin 1-1	Serpina1a;Serpina1d	1	0.599075	0.0735554	17.9937	17.1457	17.9992	17.2512	17.9937	17.1357	17.1457	17.1655
P97429	Annexin A4	Anxa4	15	0.334469	0.0738138	22.2764	22.0854	22.2764	22.3778	22.2332	22.0854	22.1015	21.6971
Q91WQ3	Tyrosine--tRNA ligase, cytoplasmic	Yars1	21	0.195307	0.0740703	20.8576	20.5823	20.7471	20.8802	20.8576	20.7715	20.5823	20.5451
P99026	Proteasome subunit beta type-4	Psmb4	7	0.0488262	0.0742275	22.2361	22.1795	22.2332	22.2361	22.2361	22.155	22.2244	22.1795
Q9CQY6	Ubiquinol-cytochrome-c reductase complex assembly factor 2	Uqcc2	5	-0.127196	0.0742678	21.1886	21.2989	21.1206	21.2707	21.1886	21.3805	21.2989	21.2821
Q9WTX5	S-phase kinase-associated protein 1	Skp1	6	0.578897	0.0742834	22.3672	21.9495	22.1269	22.3672	22.7203	21.4923	21.9495	22.0359
Q63918	Caveolae-associated protein 2	Cavin2	18	0.0510159	0.0744991	23.8764	23.8385	23.8764	23.8481	23.895	23.8385	23.7895	23.8385
Q9JKB3	Y-box-binding protein 3	Ybx3	5	0.362924	0.0746394	21.6584	21.4273	21.8614	21.5869	21.6584	21.0886	21.502	21.4273
Q921H8	3-ketoacyl-CoA thiolase A, peroxisomal	Acaa1a	16	-0.198187	0.0747089	22.9334	23.1581	22.8689	22.9334	23.0789	23.0642	23.1581	23.2535
Q9CWG8	Protein arginine methyltransferase NDUFAF7, mitochondrial	Ndufaf7	9	-0.183055	0.0747874	20.265	20.4972	20.2066	20.265	20.3645	20.4972	20.343	20.5451
Q64133	Amine oxidase [flavin-containing] A	Maoa	6	-0.234593	0.074839	19.8832	20.002	19.7089	19.8832	19.9127	19.9882	20.2185	20.002
Q9D6F9	Tubulin beta-4A chain	Tubb4a	4	-0.671161	0.0749812	21.1946	21.7634	20.4972	21.1946	21.3321	21.7634	21.8113	21.4626
P98078	Disabled homolog 2	Dab2	2	-0.624193	0.0750283	19.7123	20.2989	20.0559	19.1728	19.7123	20.2989	20.3321	20.1825
Q02566	Myosin-6	Myh6	95	-0.128358	0.075078	30.0479	30.1842	30.0479	29.995	30.0479	30.1842	30.0608	30.2308
P54726	UV excision repair protein RAD23 homolog A	Rad23a	3	0.274267	0.0751752	19.5413	19.2535	19.5413	19.6078	19.4415	19.4375	19.2535	19.0769
B2RXC8	3222402P14Rik protein	Ppp2r3a	11	0.193188	0.0752796	20.4476	20.3101	20.4476	20.3752	20.5069	20.1079	20.3101	20.3321
P04925	Major prion protein	Prnp	3	0.229029	0.075326	19.615	19.2989	19.4795	19.6488	19.615	19.2466	19.5108	19.2989
P62751	60S ribosomal protein L23a	Rpl23a	9	0.147394	0.0753315	23.0918	22.9152	22.9742	23.0918	23.1658	22.8932	22.9812	22.9153
Q9JKV1	Proteasomal ubiquitin receptor ADRM1	Adrm1	4	-0.0572796	0.0753646	21.4015	21.4726	21.3962	21.4015	21.4375	21.4726	21.4324	21.502
Q8R4H2	Rho guanine nucleotide exchange factor 12	Arhgef12	7	0.340107	0.0753849	18.9402	18.5204	18.8576	18.9402	18.9937	18.3962	18.8545	18.5204
Q8BVA5	Lipid droplet-associated hydrolase	Ldah	7	0.250063	0.0755458	20.8269	20.5915	20.6627	20.8269	20.8423	20.6364	20.5915	20.3538
P15626;Q8R5I6	Glutathione S-transferase Mu 2	Gstm2;Gstm4	3	-0.132182	0.0756118	22.848	22.9619	22.9116	22.8307	22.8481	22.9316	22.9619	23.0935
Q99LG2	Transportin-2	Tnpo2	2	0.404328	0.0756495	17.7923	17.2604	17.7923	17.8423	17.3581	17.1357	17.3836	17.2604
P59999	Actin-related protein 2/3 complex subunit 4	Arpc4	9	0.153678	0.0757042	24.0935	23.9134	24.0935	24.0526	24.1015	23.9134	24.0443	23.8288
P19785	Estrogen receptor	Esr1	9	-0.3433	0.0757312	21.4676	21.6276	21.502	21.4676	21.2006	21.6276	21.9495	21.6231
Q61510	E3 ubiquitin/ISG15 ligase TRIM25	Trim25	8	0.272156	0.0757989	19.2764	18.9112	19.2764	19.2208	19.3667	18.9083	19.2279	18.9112
P62702	40S ribosomal protein S4, X isoform	Rps4x	15	0.17534	0.0758332	24.2679	24.0443	24.1565	24.2678	24.3101	23.9847	24.1795	24.0443
Q9WUL7	ADP-ribosylation factor-like protein 3	Arl3	3	0.76879	0.0758377	21.9459	20.9316	21.9459	21.9707	21.928	20.7876	21.8191	20.9316
Q9R1Z8	Vinexin	Sorbs3	8	0.251816	0.0758622	21.5404	21.3211	21.5685	21.5404	21.4066	21.0691	21.3699	21.3211
Q9WTP6	Adenylate kinase 2, mitochondrial	Ak2	9	-0.115953	0.0758724	24.3578	24.4676	24.2607	24.3578	24.4041	24.4923	24.4105	24.4676
Q9Z1Q2	Phosphatidylserine lipase ABHD16A	Abhd16a	13	0.159857	0.0760826	21.7634	21.5777	21.7307	21.8152	21.7634	21.5777	21.7307	21.5213
Q8C7E7	Starch-binding domain-containing protein 1	Stbd1	3	0.220261	0.0761681	19.1257	18.9459	19.1257	19.1307	19.1002	18.9459	19.0292	18.7207
Q6A0D4	Raftlin	Rftn1	6	0.341592	0.0763344	19.9316	19.4795	19.8757	19.9601	19.9316	19.4025	19.8606	19.4795
Q8BWW4	La-related protein 4	Larp4	2	-1.03158	0.0763588	16.0362	17.2326	15.352	16.0362	16.3251	17.2877	16.2877	17.2326
Q9WUM3	Coronin-1B	Coro1b	6	0.167162	0.0763979	21.7836	21.5685	21.7836	21.7836	21.7265	21.5685	21.7265	21.4972
Q6PAM0	5'-AMP-activated protein kinase subunit beta-2	Prkab2	8	0.30568	0.0766088	20.4375	20.1206	20.2419	20.4476	20.4375	20.2302	19.8591	20.1206
P67984	60S ribosomal protein L22	Rpl22	3	0.145366	0.0766209	24.1332	23.9225	24.0105	24.1332	24.1642	23.9134	24.0359	23.9225
Q9Z1R4	Uncharacterized protein C6orf47 homolog	D17h6s53e	1	0.44982	0.076642	18.9854	18.5915	18.9854	19.0821	18.786	18.7373	18.5915	18.1752
Q99KR7	Peptidyl-prolyl cis-trans isomerase F, mitochondrial	Ppif	5	0.115788	0.0767485	24.1719	24.0691	24.1719	24.1871	24.1253	24.0691	23.9584	24.1095
P98203	Armadillo repeat protein deleted in velo-cardio-facial syndrome homolog	Arvcf	10	0.653565	0.0767912	19.3752	18.8697	19.2719	19.5049	19.3752	19.1079	18.8697	18.2137
Q80W54	CAAX prenyl protease 1 homolog	Zmpste24	10	0.170464	0.0768799	20.4972	20.2877	20.4066	20.5069	20.4972	20.2877	20.417	20.1946
Q9CPT4	Myeloid-derived growth factor	Mydgf	5	0.278696	0.0768893	21.0886	20.8876	21.0156	21.2477	21.0886	20.654	20.9742	20.8876
P25444	40S ribosomal protein S2	Rps2	9	0.107852	0.0769744	25.4041	25.341	25.4041	25.3975	25.4984	25.341	25.3712	25.2643
P41317	Mannose-binding protein C	Mbl2	1	-1.70062	0.0769952	16.224	17.8667	14.9705	16.224	17.2967	17.4252	17.8666	18.3012
Q9ERS5	Pleckstrin homology domain-containing family A member 2	Plekha2	1	2.61216	0.0772749	19.4273	16.8727	19.4273	19.4252	19.4656	14.8916	16.8727	18.7173
Q61160	FAS-associated death domain protein	Fadd	2	0.650314	0.07728	18.4696	17.6937	18.5657	18.4696	18.3667	18.3321	17.6937	17.4252
P53994	Ras-related protein Rab-2A	Rab2a	12	0.135022	0.0774809	23.4676	23.3376	23.417	23.4676	23.5285	23.2535	23.417	23.3376
Q00PI9	Heterogeneous nuclear ribonucleoprotein U-like protein 2	Hnrnpul2	18	0.328248	0.077573	22.3101	21.9207	22.2419	22.3101	22.4425	21.9207	22.2506	21.8385
Q8QZZ7	EKC/KEOPS complex subunit Tprkb	Tprkb	1	0.713561	0.0777019	17.8484	17.1752	18.3012	17.7796	17.8484	17.1752	17.7406	16.8727
Q9QXC1	Fetuin-B	Fetub	2	0.452274	0.0780657	20.6886	20.1079	20.8727	20.5731	20.6886	20.0691	20.6006	20.1079
Q9ES28	Rho guanine nucleotide exchange factor 7	Arhgef7	10	0.318207	0.0782738	19.7471	19.4716	19.7373	20.0559	19.7471	19.417	19.4716	19.6971
Q3UN90	LYR motif-containing protein 9	Lyrm9	1	0.544591	0.0782785	17.9882	17.2604	18.0899	17.528	17.9882	17.0951	17.6168	17.2604
P17225	Polypyrimidine tract-binding protein 1	Ptbp1	6	0.354294	0.0782911	22.2877	21.8538	22.2877	22.2214	22.3239	21.8538	22.2066	21.7098
Q8K019	Bcl-2-associated transcription factor 1	Bclaf1	5	0.389469	0.078561	19.4067	19.1605	19.6293	19.4066	19.3365	18.7923	19.1605	19.2512
Q922H2	[Pyruvate dehydrogenase (acetyl-transferring)] kinase isozyme 3, mitochondrial	Pdk3	7	0.772079	0.0787933	23.3376	22.417	23.155	23.4923	23.3376	23.1565	22.417	22.0951
O35435	Dihydroorotate dehydrogenase (quinone), mitochondrial	Dhodh	14	-0.364218	0.0789797	20.7471	21.1581	20.7471	20.6186	20.8576	21.3156	20.8423	21.1581
P70414	Sodium/calcium exchanger 1	Slc8a1	26	0.145238	0.0792611	23.2961	23.1961	23.2821	23.2961	23.3101	23.0292	23.2273	23.1961
Q9JK48	Endophilin-B1	Sh3glb1	12	0.126045	0.0792749	21.85	21.6628	21.8651	21.7915	21.8499	21.6584	21.8073	21.6627
Q3UBX0	Transmembrane protein 109	Tmem109	7	0.186307	0.0794249	22.8783	22.6649	22.8783	22.7471	22.9459	22.58	22.7675	22.6649
Q921Z5	Tumor necrosis factor alpha-induced protein 8	Tnfaip8	5	-0.257928	0.0796425	19.2442	19.4496	19.373	19.0047	19.2442	19.4496	19.5108	19.4354
Q8BVG4	Dipeptidyl peptidase 9	Dpp9	9	0.561907	0.0797206	20.0426	19.615	20.1581	20.0426	19.7876	19.615	19.68	19.0074
Q8C1B7	Septin-11	Septin11	8	0.212432	0.079785	21.0821	20.9098	21.0625	21.1015	21.0821	20.9098	21.002	20.6971
Q9D0I6	WD repeat, SAM and U-box domain-containing protein 1	Wdsub1	4	0.181775	0.0798285	19.4375	19.1704	19.4375	19.2396	19.4516	19.2673	19.1703	19.1457
Q922D4	Serine/threonine-protein phosphatase 6 regulatory subunit 3	Ppp6r3	13	0.143269	0.079968	20.0559	19.9229	20.0426	20.0559	20.1946	19.9229	20.0292	19.9112
A0A140T8M9	Immunoglobulin kappa chain variable 1-122 (Fragment)	Igkv1-122	1	1.41985	0.0801313	18.3189	17.3495	19.8191	17.9258	18.3189	16.8965	17.3495	17.5582
Q9CW46	Ribonucleoprotein PTB-binding 1	Raver1	2	0.368147	0.080617	18.963	18.6204	18.963	18.9402	19.0265	18.6204	18.8727	18.3321
Q9DC69	NADH dehydrogenase [ubiquinone] 1 alpha subcomplex subunit 9, mitochondrial	Ndufa9	28	-0.114033	0.0806295	26.7771	26.9203	26.8142	26.7771	26.7771	26.9202	26.8142	26.976
B8JJ69	RIKEN cDNA 2310061I04 gene	2310061I04Rik	9	-0.219789	0.0807896	21.1457	21.3805	21.0156	21.1457	21.2535	21.2361	21.3805	21.4576
Q9CWX2	Complex I intermediate-associated protein 30, mitochondrial	Ndufaf1	16	-0.149361	0.0807925	20.7389	20.9459	20.7307	20.7389	20.8346	20.9459	20.8113	20.9951
Q9Z1R2	Large proline-rich protein BAG6	Bag6	16	0.16194	0.0808425	22.5045	22.3672	22.4526	22.5045	22.5662	22.44	22.3672	22.2302
E9Q8Q6	Coiled-coil domain-containing 141	Ccdc141	51	0.109727	0.0809687	21.7307	21.5869	21.7307	21.7348	21.6928	21.5451	21.6971	21.5869
Q8BMS1	Trifunctional enzyme subunit alpha, mitochondrial	Hadha	51	-0.148593	0.0809717	28.249	28.4785	28.3282	28.2445	28.249	28.4823	28.3066	28.4785
Q8R5M0	PDZ domain-containing protein GIPC3	Gipc3	1	-1.08686	0.0810924	16.8965	17.68	16.8965	15.6883	17.2042	17.68	17.8113	17.5582
Q9Z2B9	Ribosomal protein S6 kinase alpha-4	Rps6ka4	2	0.558772	0.0812246	17.786	17.0532	17.786	17.8847	17.7207	16.9545	17.7072	17.0532
A2ADF7	Solute carrier family 25 member 34	Slc25a34	7	0.199219	0.0812247	19.9601	19.7207	19.9601	19.7796	19.9601	19.7955	19.586	19.7207
Q921G8	Gamma-tubulin complex component 2	Tubgcp2	2	-0.358073	0.0814062	15.9036	16.4087	15.786	16.0764	15.9036	16.4087	16.4104	16.0211
P15864;P43277	Histone H1.2	H1-2;H1-3	3	0.244808	0.0814582	27.509	27.2535	27.6181	27.4394	27.509	27.2535	27.4473	27.1312
Q8R2Z5	von Willebrand factor A domain-containing protein 1	Vwa1	10	-0.339589	0.0815043	20.5165	20.9243	20.3962	20.654	20.5165	20.9243	21.0426	20.6186
Q6PDN3	Myosin light chain kinase, smooth muscle	Mylk	15	-0.38022	0.0816203	20.7389	21.2361	20.7389	20.5545	21.0156	20.9601	21.2361	21.2535
Q9Z110	Delta-1-pyrroline-5-carboxylate synthase	Aldh18a1	6	0.783295	0.0818094	19.0976	17.9882	18.724	19.1231	19.0976	17.7923	18.8144	17.9882
Q02566;Q5SX40	Myosin-6	Myh1;Myh6	2	-0.120788	0.0819937	23.3239	23.4425	23.3239	23.3511	23.3101	23.4425	23.3645	23.5404
Q9JI19	Acidic fibroblast growth factor intracellular-binding protein	Fibp	3	1.58046	0.082215	17.9826	16.9348	17.9826	18.1206	17.7537	17.1556	16.9348	15.0251
P04945	Ig kappa chain V-VI region NQ2-6.1		1	2.49295	0.0822657	18.1257	16.3381	18.1257	20.6186	17.0847	16.415	15.597	16.3381
Q91XL9	Oxysterol-binding protein-related protein 1	Osbpl1a	6	-0.212999	0.082306	21.3699	21.5356	21.3484	21.3699	21.4324	21.5356	21.7715	21.4825
P62071	Ras-related protein R-Ras2	Rras2	6	0.267529	0.0823136	21.7223	21.3211	21.7675	21.7223	21.5309	21.3211	21.5869	21.3101
Q6P9Z1	SWI/SNF-related matrix-associated actin-dependent regulator of chromatin subfamily D member 3	Smarcd3	1	-0.961009	0.0823301	16.3718	17.0847	16.3718	16.4672	15.5296	16.579	17.5878	17.0847
Q8VHL1	Histone-lysine N-methyltransferase SETD7	Setd7	4	0.200853	0.0824036	19.2764	19.1332	19.3277	19.2764	19.2764	19.2161	18.9287	19.1332
P62717	60S ribosomal protein L18a	Rpl18a	8	0.158449	0.0824528	23.2821	23.0805	23.181	23.2821	23.3101	23.0122	23.2051	23.0805
P70335	Rho-associated protein kinase 1	Rock1	11	-0.26113	0.0824983	19.0211	19.2349	19.0211	18.7504	19.0346	19.0691	19.2855	19.2349
P97314	Cysteine and glycine-rich protein 2	Csrp2	4	-0.507209	0.0825585	20.0156	20.4972	20.0156	19.9316	20.0691	20.1457	20.4972	20.895
Q8BX94;Q91XL9	Oxysterol-binding protein-related protein 2	Osbpl1a;Osbpl2	1	0.248695	0.0826068	19.1655	18.9488	19.2232	19.1655	19.1605	18.7439	19.1104	18.9488
Q71LX4	Talin-2	Tln2	71	0.204365	0.0827195	23.1765	22.9225	23.1765	23.1795	23.1063	22.9225	23.1095	22.8171
Q05816	Fatty acid-binding protein 5	Fabp5	4	0.203091	0.0829196	23.3511	23.1749	23.2477	23.3511	23.5165	23.0951	23.2361	23.1749
P61161	Actin-related protein 2	Actr2	14	0.181323	0.0830709	23.5638	23.3101	23.5165	23.5983	23.5638	23.3101	23.5285	23.2961
O35071;Q60575	Kinesin-like protein KIF1C	Kif1b;Kif1c	2	-0.136646	0.0831952	20.654	20.7876	20.714	20.654	20.6186	20.714	20.895	20.7876
P37804	Transgelin	Tagln	15	-0.500267	0.0833201	23.3778	24.002	23.3778	23.1238	23.6865	23.6096	24.002	24.0772
Q91VD9	NADH-ubiquinone oxidoreductase 75 kDa subunit, mitochondrial	Ndufs1	53	-0.110748	0.0833989	27.0609	27.189	27.0608	27.0711	27.0505	27.189	27.0813	27.2445
Q9D6U8	Protein FAM162A	Fam162a	8	0.175187	0.083462	24.3778	24.2891	24.3645	24.5225	24.3778	24.317	24.1332	24.2891
Q5XJY5	Coatomer subunit delta	Arcn1	19	0.194473	0.0834768	21.4526	21.2006	21.4221	21.4526	21.5069	21.2006	21.4273	21.1703
P97855	Ras GTPase-activating protein-binding protein 1	G3bp1	11	-0.07536	0.0835167	22.2006	22.2679	22.1457	22.2244	22.2006	22.2244	22.3045	22.2678
B2RXC2	Kinase	Itpkb	1	0.580824	0.0837573	17.3408	16.6382	17.3408	17.0743	17.3921	16.311	16.6382	17.1155
Q9JHS4	ATP-dependent Clp protease ATP-binding subunit clpX-like, mitochondrial	Clpx	13	-0.102208	0.0837759	20.5261	20.5915	20.5356	20.5261	20.4576	20.68	20.5545	20.5915
Q80X71	Transmembrane protein 106B	Tmem106b	3	-0.241515	0.0837771	18.83	19.0102	18.8906	18.83	18.805	18.9545	19.0102	19.2855
Q8BND5	Sulfhydryl oxidase 1	Qsox1	4	0.531617	0.0838755	19.4025	18.7537	19.4025	19.5375	19.3299	18.7537	19.3299	18.5915
Q9D142	Uridine diphosphate glucose pyrophosphatase NUDT14	Nudt14	3	0.222783	0.083978	18.9909	18.7106	18.9992	18.9112	18.9909	18.92	18.6024	18.7106
Q9DCL9	Bifunctional phosphoribosylaminoimidazole carboxylase/phosphoribosylaminoimidazole succinocarboxamide synthetase	Paics	17	0.0307344	0.0840387	22.937	22.9116	22.9225	22.937	22.9619	22.9116	22.8969	22.9207
P58044	Isopentenyl-diphosphate Delta-isomerase 1	Idi1	2	1.06312	0.0846329	17.9488	17.1257	17.7005	18.3408	17.9488	16.1168	17.1257	17.5582
Q8BWT1	3-ketoacyl-CoA thiolase, mitochondrial	Acaa2	33	-0.186943	0.0848018	28.1214	28.391	28.17	28.1214	28.1065	28.391	28.1604	28.4073
Q8CC35	Synaptopodin	Synpo	17	-0.208633	0.0848449	22.1673	22.3962	22.1673	22.2736	22.0821	22.502	22.3962	22.2506
P18760;P45591	Cofilin-1	Cfl1;Cfl2	1	0.211168	0.0849883	25.0233	24.8623	25.0233	24.9933	25.0772	24.6486	24.9495	24.8623
P14131	40S ribosomal protein S16	Rps16	11	0.113543	0.0850189	24.3844	24.2679	24.3844	24.3511	24.4551	24.2244	24.3578	24.2678
E9Q8I9	Protein furry homolog	Fry	4	0.320666	0.0852037	18.8606	18.5657	18.6766	18.8606	19.1407	18.5049	18.5657	18.6453
P14142	Solute carrier family 2, facilitated glucose transporter member 4	Slc2a4	8	-0.052255	0.0855936	23.867	23.9316	23.9043	23.867	23.8481	23.9316	23.895	23.9495
Q91VS7	Microsomal glutathione S-transferase 1	Mgst1	4	-0.464848	0.0857889	21.1395	21.5592	20.9243	21.2477	21.1395	21.8876	21.5592	21.2593
Q91YT0	NADH dehydrogenase [ubiquinone] flavoprotein 1, mitochondrial	Ndufv1	25	-0.126022	0.0859741	26.4923	26.604	26.4692	26.5014	26.4923	26.604	26.524	26.7129
Q8BJD1	Inter-alpha-trypsin inhibitor heavy chain H5	Itih5	6	0.564069	0.0861159	19.5261	18.7634	19.714	19.3211	19.5261	18.7634	19.3983	18.7072
P62245	40S ribosomal protein S15a	Rps15a	6	0.106304	0.0863348	23.9406	23.8385	23.9043	23.9406	24.0359	23.8385	23.9043	23.8191
Q78JE5	F-box only protein 22	Fbxo22	7	0.318748	0.0864025	20.654	20.265	20.6886	20.4676	20.654	20.265	20.5069	20.0821
D3Z4I3	RNA-binding protein 24	Rbm24	3	0.227901	0.0865264	20.9672	20.6186	20.7796	20.9672	21.0088	20.6186	20.6186	20.8346
Q64373	Bcl-2-like protein 1	Bcl2l1	4	0.310441	0.0866605	19.6817	19.2832	19.3794	19.7828	19.6818	19.4252	19.2042	19.2832
P08032	Spectrin alpha chain, erythrocytic 1	Spta1	41	-0.317361	0.0867318	20.2535	20.5069	20.2764	20.0821	20.2535	20.3101	20.7471	20.5069
Q9CZN7	Serine hydroxymethyltransferase, mitochondrial	Shmt2	16	-0.0864633	0.0867622	21.8346	21.9024	21.8152	21.8538	21.8346	21.9024	21.8689	21.9916
Q99KV1	DnaJ homolog subfamily B member 11	Dnajb11	7	0.319553	0.0869339	21.0691	20.7223	21.0426	21.0691	21.1206	20.7223	21.0156	20.5356
Q6ZWZ2	Ubiquitin-conjugating enzyme E2 R2	Ube2r2	2	0.153701	0.0870204	20.2066	20.1079	20.2066	20.1946	20.3538	20.1079	20.1703	20.0156
P14685	26S proteasome non-ATPase regulatory subunit 3	Psmd3	35	0.0685768	0.0870213	22.0658	21.9882	22.0054	22.0658	22.0951	21.9882	22.0122	21.9601
O08638	Myosin-11	Myh11	75	-0.417631	0.0872081	21.6757	22.1363	21.6757	21.4676	21.9171	21.8614	22.1363	22.3156
Q8CI94;Q9ET01;Q9WUB3	Glycogen phosphorylase, brain form	Pygb;Pygl;Pygm	7	-0.139494	0.0874652	27.6181	27.8203	27.5898	27.6181	27.673	27.8203	27.6527	27.8264
A0A0A6YY83	Protocadherin 7	Pcdh7	2	0.421938	0.0875837	18.0951	17.5657	18.0951	17.8423	18.1605	17.3581	17.9083	17.5657
Q7TT50	Serine/threonine-protein kinase MRCK beta	Cdc42bpb	8	0.197128	0.0875892	21.3857	21.1269	21.3857	21.2477	21.4676	21.0951	21.1269	21.2877
E9PYG6	RAS p21 protein activator 1	Rasa1	4	-0.530377	0.0876932	18.8606	19.2967	19.1181	18.6488	18.8606	19.1407	19.7812	19.2967
P80316	T-complex protein 1 subunit epsilon	Cct5	21	-0.0975202	0.0877187	22.3017	22.4015	22.3017	22.2877	22.3239	22.4015	22.4751	22.3294
O35326;Q3TWW8;Q8VE97	Serine/arginine-rich splicing factor 5	Srsf4;Srsf5;Srsf6	1	0.390521	0.0877982	22.7203	22.2096	22.7935	22.6119	22.7203	22.2096	22.1015	22.6431
P47758	Signal recognition particle receptor subunit beta	Srprb	11	-0.107659	0.0878279	21.1704	21.2302	21.1269	21.1703	21.1703	21.2066	21.3538	21.2302
P31750;Q60823	RAC-alpha serine/threonine-protein kinase	Akt1;Akt2	4	-0.531075	0.0878934	19.2208	19.5676	19.2442	19.2208	19.1655	20.2066	19.5676	19.4496
P27661;Q64522	Histone H2AX	H2ac21;H2ax	3	0.211408	0.0879527	29.6216	29.3174	29.6915	29.6216	29.4532	29.3131	29.5014	29.3174
Q9WVC3	Caveolin-2	Cav2	5	-0.133102	0.0880327	21.7348	21.8152	21.5823	21.7512	21.7348	21.8152	21.8689	21.7836
Q91WG4	Elongator complex protein 2	Elp2	2	0.387395	0.0880454	17.5951	17.3233	17.6869	17.417	17.5951	17.3233	17.3408	16.8727
P61148	Fibroblast growth factor 1	Fgf1	5	0.222348	0.088106	22.1332	21.8689	22.239	22.1332	21.9352	21.9601	21.8113	21.8689
P63001	Ras-related C3 botulinum toxin substrate 1	Rac1	8	0.193374	0.0881444	24.5285	24.3101	24.48	24.5285	24.5983	24.3101	24.4923	24.2244
O89103	Complement component C1q receptor	Cd93	4	0.224607	0.0882395	21.3266	21.1269	21.2302	21.3266	21.3321	21.1269	20.8876	21.2006
Q9Z0Y1	Dynactin subunit 3	Dctn3	5	0.173929	0.0883331	21.3321	21.1581	21.3321	21.3266	21.3805	21.0493	21.3101	21.1581
O88271	Craniofacial development protein 1	Cfdp1	2	0.315042	0.0885434	19.6523	19.3709	19.6523	19.7273	19.6204	19.1053	19.3709	19.5786
P36552	Oxygen-dependent coproporphyrinogen-III oxidase, mitochondrial	Cpox	14	0.154612	0.0886639	22.1734	21.9459	22.1734	22.1174	22.1765	21.9243	21.9459	22.1332
Q7TMB8	Cytoplasmic FMR1-interacting protein 1	Cyfip1	13	0.139541	0.0887899	20.5638	20.4972	20.5638	20.5545	20.6364	20.4972	20.5069	20.3321
Q91VR5	ATP-dependent RNA helicase DDX1	Ddx1	23	0.100697	0.088793	22.2621	22.1206	22.2621	22.2736	22.2185	22.1206	22.2332	22.0983
Q9JKC8	AP-3 complex subunit mu-1	Ap3m1	3	0.453416	0.0888572	20.6886	20.2989	20.6886	20.6886	20.6971	20.2989	20.5545	19.8606
O35658	Complement component 1 Q subcomponent-binding protein, mitochondrial	C1qbp	5	-0.127478	0.0889555	24.1174	24.2535	24.1174	24.1253	24.0854	24.2535	24.1332	24.3239
Q9DBZ1	Inhibitor of nuclear factor kappa-B kinase-interacting protein	Ikbip	1	-2.68804	0.0889563	15.4278	19.265	14.6298	15.4278	17.8906	17.2877	19.265	19.4596
Q6URW6	Myosin-14	Myh14	68	-0.129123	0.0891306	21.2989	21.4825	21.2764	21.2989	21.4066	21.3752	21.4825	21.5117
Q61011	Guanine nucleotide-binding protein G(I)/G(S)/G(T) subunit beta-3	Gnb3	2	1.62529	0.0892499	20.0426	18.1605	20.0426	20.2764	19.9601	18.1605	17.4004	19.8423
Q9EPB4	Apoptosis-associated speck-like protein containing a CARD	Pycard	10	0.336634	0.0892759	21.0088	20.5731	21.0088	20.6453	21.0951	20.4775	20.6886	20.5731
P0C605	cGMP-dependent protein kinase 1	Prkg1	14	0.253519	0.0894246	20.2877	20.0292	20.4576	20.2877	20.1825	20.0292	20.2066	19.9316
Q9ES89	Exostosin-like 2	Extl2	1	2.113	0.0896849	19.1531	17.3056	19.2018	18.8454	19.1531	18.3794	17.3056	15.1763
Q8CD26	Solute carrier family 35 member E1	Slc35e1	1	0.647462	0.0896934	17.4004	16.734	17.9141	17.4004	17.3752	17.3752	16.6382	16.734
Q99JR6	Nicotinamide/nicotinic acid mononucleotide adenylyltransferase 3	Nmnat3	12	-0.357025	0.0897183	22.0054	22.2155	22.0951	22.0054	21.6627	22.4576	22.2155	22.1612
Q9CQ19	Myosin regulatory light polypeptide 9	Myl9	2	-0.387781	0.0897702	21.632	22.1079	21.632	21.4775	21.9316	21.8576	22.1079	22.239
Q9CQI3	Glia maturation factor beta	Gmfb	5	0.11206	0.0899042	21.5915	21.4775	21.5915	21.68	21.5117	21.5069	21.4626	21.4775
P14824;P97429	Annexin A6	Anxa4;Anxa6	1	0.149843	0.0899502	23.0838	22.9388	23.1961	23.0837	23.0789	22.9388	23.0772	22.8932
Q8VI63	MOB kinase activator 2	Mob2	1	0.146187	0.0900126	19.9156	19.714	19.9459	19.8097	19.9156	19.6749	19.8438	19.714
Q8CFI5	Probable proline--tRNA ligase, mitochondrial	Pars2	8	-0.253407	0.0904082	19.3815	19.6006	19.4775	19.3815	19.3365	19.856	19.4991	19.6006
A0A1D5RLD8	Glyceraldehyde-3-phosphate dehydrogenase	Gm10358	32	0.248994	0.0905096	29.341	29.109	29.341	29.2781	29.3704	29.2535	28.8799	29.109
Q8BPB5	EGF-containing fibulin-like extracellular matrix protein 1	Efemp1	3	0.686549	0.0905431	18.8144	18.0585	18.8144	18.8727	18.2042	18.0585	18.2604	17.5127
Q8BWU5	tRNA N6-adenosine threonylcarbamoyltransferase	Osgep	3	0.29003	0.0906333	19.5842	19.1777	19.5713	19.6222	19.5842	19.1679	19.562	19.1777
Q9D2R6	Cytochrome c oxidase assembly factor 3 homolog, mitochondrial	Coa3	1	-0.447928	0.0908591	20.7634	21.0493	20.7634	20.1825	20.7876	21.0493	20.9459	21.0821
Q8CJG0	Protein argonaute-2	Ago2	15	0.185186	0.0910662	20.0821	19.9742	20.0821	20.1332	20.0821	19.7521	20.0156	19.9742
Q9WVL3	Solute carrier family 12 member 7	Slc12a7	23	-0.127697	0.0911267	21.2821	21.4576	21.2593	21.4273	21.2821	21.4576	21.4066	21.4874
Q99LC8	Translation initiation factor eIF-2B subunit alpha	Eif2b1	3	1.05655	0.0914068	18.2558	16.977	17.1556	18.2558	18.5356	16.977	16.5127	17.2877
Q922Z0	D-aspartate oxidase	Ddo	2	-0.887143	0.0915643	19.5601	20.4775	19.3277	20.0821	19.5601	20.002	20.4775	21.1519
Q9Z0X1	Apoptosis-inducing factor 1, mitochondrial	Aifm1	36	-0.0955874	0.0918104	25.141	25.2679	25.1174	25.1795	25.141	25.2678	25.1642	25.2926
Q91WD5	NADH dehydrogenase [ubiquinone] iron-sulfur protein 2, mitochondrial	Ndufs2	28	-0.111219	0.0923601	26.4583	26.604	26.4583	26.4723	26.4425	26.604	26.4707	26.632
P16110	Galectin-3	Lgals3	3	0.867935	0.0924426	19.5731	18.6523	19.4835	19.5731	20.0951	18.6523	19.5204	18.3752
P07724	Albumin	Alb	40	0.27925	0.0925734	28.995	28.6216	28.8534	28.995	29.003	28.4976	28.8945	28.6216
Q9D6K8	FUN14 domain-containing protein 2	Fundc2	7	-0.0628268	0.0927456	22.9882	23.0625	22.9882	22.9566	23.0526	23.0691	23.0625	23.0542
Q9ERG2	Striatin-3	Strn3	11	-0.0580622	0.0929575	20.5823	20.6096	20.5823	20.5915	20.5165	20.6453	20.6096	20.6096
P14231	Sodium/potassium-transporting ATPase subunit beta-2	Atp1b2	1	-0.375076	0.0930301	17.9488	18.4293	17.8113	17.9488	17.9601	17.9545	18.4616	18.4293
P04627	Serine/threonine-protein kinase A-Raf	Araf	5	0.261419	0.0931097	19.3408	19.0951	19.6114	19.3408	19.265	19.0951	19.2558	19.0821
Q5HZI9	Mitochondrial nicotinamide adenine dinucleotide transporter SLC25A51	Slc25a51	10	0.0849222	0.0931892	21.4626	21.3805	21.4526	21.4626	21.4726	21.4425	21.3101	21.3805
Q9CVB6	Actin-related protein 2/3 complex subunit 2	Arpc2	15	0.195304	0.0932485	23.0493	22.7816	23.0241	23.0493	23.0592	22.7816	23.0241	22.741
P15864	Histone H1.2	H1-2	3	0.228023	0.0932927	23.2961	23.0476	23.4551	23.2678	23.2961	23.0476	23.2821	23.0054
P35762	CD81 antigen	Cd81	2	0.108985	0.0934354	21.7223	21.6276	21.6714	21.8191	21.7223	21.6714	21.6276	21.5869
Q9Z1W9	STE20/SPS1-related proline-alanine-rich protein kinase	Stk39	5	0.159668	0.093648	21.8113	21.6186	21.7715	21.8113	21.9024	21.7915	21.6186	21.5961
Q9D0R8	Protein LSM12 homolog	Lsm12	3	0.346921	0.0936499	19.7207	19.4067	19.6042	19.7207	19.9459	19.4066	19.1994	19.624
Q6ZQ73	Cullin-associated NEDD8-dissociated protein 2	Cand2	37	-0.105541	0.0938406	22.6757	22.7634	22.5592	22.7035	22.6757	22.7776	22.714	22.7634
P62281	40S ribosomal protein S11	Rps11	8	0.161146	0.0938495	23.178	22.9899	23.0642	23.178	23.2125	22.9899	23.0918	22.8895
Q8R0H9	ADP-ribosylation factor-binding protein GGA1	Gga1	6	0.173375	0.0940204	19.8331	19.6731	19.9316	19.7699	19.8331	19.7812	19.6731	19.5601
P08207	Protein S100-A10	S100a10	1	0.620368	0.0941249	18.3836	17.5049	17.8423	18.4415	18.3836	17.5049	17.2967	18.0047
Q3UQN2	F-BAR domain only protein 2	Fcho2	2	0.25826	0.0942054	18.8846	18.5165	18.8847	18.6096	18.8995	18.6731	18.4293	18.5165
Q8BJF9	Charged multivesicular body protein 2b	Chmp2b	5	0.310558	0.0946629	19.8438	19.64	19.7699	19.8438	20.002	19.3167	19.7273	19.64
P17563	Methanethiol oxidase	Selenbp1	29	-0.168795	0.0947138	25.5285	25.6865	25.5433	25.4105	25.5285	25.5404	25.6865	25.7619
Q9CZY3;Q9D2M8	Ubiquitin-conjugating enzyme E2 variant 1	Ube2v1;Ube2v2	4	0.0582428	0.0947196	23.5045	23.4298	23.5165	23.5045	23.4676	23.4298	23.48	23.4041
Q9CQC7	NADH dehydrogenase [ubiquinone] 1 beta subcomplex subunit 4	Ndufb4	10	-0.138242	0.0951888	25.6348	25.7103	25.6348	25.558	25.6486	25.7103	25.6811	25.8647
Q9DC28	Casein kinase I isoform delta	Csnk1d	5	0.310575	0.0954086	20.3962	20.1825	20.3962	20.3321	20.6276	20.1825	20.3101	19.9316
Q8JZK9	Hydroxymethylglutaryl-CoA synthase, cytoplasmic	Hmgcs1	2	-0.3189	0.0955276	18.0047	18.265	18.0047	17.6453	18.1002	18.3012	18.265	18.1407
Q8BJU0	Small glutamine-rich tetratricopeptide repeat-containing protein alpha	Sgta	7	0.403725	0.095668	19.5204	19.1104	19.3645	19.5204	19.7955	18.9459	19.4129	19.1104
Q8BG32	26S proteasome non-ATPase regulatory subunit 11	Psmd11	22	0.0511513	0.095721	22.5915	22.5592	22.5915	22.6186	22.5708	22.5638	22.5592	22.5045
Q70IV5	Synemin	Synm	4	0.564228	0.0957445	19.5526	18.8545	19.5526	19.7715	18.9798	19.0664	18.8545	18.6903
Q9Z239	Phospholemman	Fxyd1	1	-0.105218	0.0960441	24.9539	25.019	24.9539	24.945	24.9672	25.019	25.0062	25.1565
Q8R5I6	Glutathione S-transferase Mu 4	Gstm4	2	-0.735116	0.0961961	19.1332	19.9112	19.1332	18.5731	19.6488	19.9112	20.0559	19.5933
Q8BH69	Selenide, water dikinase 1	Sephs1	6	0.284194	0.0962454	21.1206	20.7389	21.1206	21.0886	21.2125	20.7389	21.1079	20.7223
P42932	T-complex protein 1 subunit theta	Cct8	29	-0.0865472	0.0964505	23.1519	23.2288	23.0805	23.1519	23.178	23.2288	23.2678	23.1734
Q6NT99	Dual specificity protein phosphatase 23	Dusp23	5	-0.369467	0.0965114	19.1357	19.6593	19.1028	19.1357	19.606	19.6593	19.5564	19.7373
Q8CHW4	Translation initiation factor eIF-2B subunit epsilon	Eif2b5	6	0.154007	0.0966419	19.2512	19.1432	19.2512	19.3408	19.1922	19.1432	19.1825	18.9964
A2A5R2	Brefeldin A-inhibited guanine nucleotide-exchange protein 2	Arfgef2	14	0.382009	0.0969759	19.6835	19.3233	19.6835	19.8621	19.6204	19.3233	19.6276	19.0691
O70404	Vesicle-associated membrane protein 8	Vamp8	3	0.43893	0.097031	19.2741	18.7699	19.2741	19.4636	19.1507	18.7699	19.2066	18.5951
P47199	Quinone oxidoreductase	Cryz	12	-0.172497	0.0972917	21.6051	21.8689	21.6971	21.5915	21.6051	21.8839	21.8689	21.6584
Q9WVL1	AP-4 complex subunit sigma-1	Ap4s1	1	0.422034	0.0973461	18.4854	17.7987	18.5088	18.0638	18.4854	17.7987	18.1946	17.7987
P35505	Fumarylacetoacetase	Fah	7	-0.35548	0.0974431	20.2302	20.5069	20.3645	20.2302	19.8438	20.5915	20.4066	20.5069
P62715;P63330	Serine/threonine-protein phosphatase 2A catalytic subunit beta isoform	Ppp2ca;Ppp2cb	12	0.180494	0.0975947	24.6096	24.4298	24.6096	24.6264	24.5869	24.2821	24.5696	24.4298
Q9EQS3	c-Myc-binding protein	Mycbp	5	0.425834	0.0979696	19.5375	19.2967	19.5375	19.5049	19.734	18.8018	19.4004	19.2967
Q9Z2E1	Methyl-CpG-binding domain protein 2	Mbd2	2	-0.47366	0.0981487	18.3189	18.7039	18.3189	17.9714	18.3879	19.0074	18.3879	18.7039
Q9JKR6	Hypoxia up-regulated protein 1	Hyou1	18	-0.242464	0.0981609	21.4626	21.6886	21.4626	21.3805	21.5498	21.6886	21.8913	21.5404
Q99LD8;Q9CWS0	N(G),N(G)-dimethylarginine dimethylaminohydrolase 2	Ddah1;Ddah2	1	0.382551	0.0990241	20.85	20.4476	20.7307	20.8499	20.8576	20.4476	20.7223	20.1206
Q9WTM5	RuvB-like 2	Ruvbl2	15	0.149371	0.099059	21.3101	21.1206	21.3211	21.3101	21.2933	21.0625	21.2933	21.1206
Q8CGZ0	Calcium homeostasis endoplasmic reticulum protein	Cherp	1	1.1782	0.0990635	17.5127	15.9177	17.2326	17.5127	17.7005	17.3581	15.9177	15.6354
Q8K3G9	DCC-interacting protein 13-beta	Appl2	4	0.419763	0.0990958	18.4893	18.0426	18.2466	18.4894	18.5878	18.3012	18.0426	17.7207
Q8C1B7;Q8CHH9;Q9R1T4	Septin-11	Septin11;Septin6;Septin8	2	0.188093	0.0993619	21.4425	21.2125	21.391	21.4425	21.4526	21.2125	21.4015	21.1079
Q8R3Q0	Store-operated calcium entry-associated regulatory factor	Saraf	2	0.533136	0.099498	19.5394	19.0532	19.8377	19.5394	19.3145	19.0532	18.6766	19.3624
Q9JHS3	Ragulator complex protein LAMTOR2	Lamtor2	3	-0.36653	0.0997163	19.6311	19.8454	19.1482	19.6311	19.647	19.7504	19.9301	19.8454
Q9CQF9	Prenylcysteine oxidase 1	Pcyox1	12	0.0938301	0.100032	22.1642	22.0691	22.1642	22.1612	22.1856	22.155	22.0691	22.0054
P14206	40S ribosomal protein SA	Rpsa	10	0.157765	0.100512	24.3307	24.1871	24.2535	24.3307	24.4862	24.1871	24.2535	24.1565
P14733;P21619	Lamin-B1	Lmnb1;Lmnb2	4	0.155607	0.100886	22.7182	22.5189	22.7856	22.7182	22.7182	22.5189	22.7244	22.5117
Q99KN9	Clathrin interactor 1	Clint1	12	0.154121	0.100943	19.7106	19.5318	19.6453	19.7106	19.8222	19.5108	19.6731	19.5318
Q9DCD0	6-phosphogluconate dehydrogenase, decarboxylating	Pgd	17	0.226362	0.100979	22.6298	22.4501	22.6298	22.6518	22.5568	22.4501	22.5237	22.1856
P40630	Transcription factor A, mitochondrial	Tfam	11	-0.16331	0.101187	21.8651	22.019	21.7675	21.9916	21.8651	22.1174	21.9777	22.019
Q792Z1	Trypsin 10	Try10	2	-0.158143	0.101197	21.5451	21.632	21.5915	21.4066	21.5451	21.7715	21.632	21.6141
P61750	ADP-ribosylation factor 4	Arf4	4	0.212277	0.101316	21.4221	21.1143	21.2764	21.4273	21.4221	21.0426	21.3321	21.1143
P18872	Guanine nucleotide-binding protein G(o) subunit alpha	Gnao1	6	0.531153	0.101521	21.6096	20.895	21.3857	21.6096	21.8576	20.8576	21.5069	20.895
Q9EST5	Acidic leucine-rich nuclear phosphoprotein 32 family member B	Anp32b	2	0.100011	0.101825	20.2877	20.2419	20.3645	20.2764	20.2877	20.2535	20.2419	20.1332
Q9CYR0	Single-stranded DNA-binding protein, mitochondrial	Ssbp1	6	-0.105572	0.101855	22.4947	22.6141	22.5165	22.4601	22.4947	22.6671	22.6141	22.5069
P35288	Ras-related protein Rab-23	Rab23	2	1.57258	0.10193	20.1457	18.8207	20.3752	19.7828	20.1457	18.8207	19.6096	17.1556
Q91WU5	Arsenite methyltransferase	As3mt	13	-0.0917899	0.102563	21.5592	21.6757	21.5498	21.5592	21.5961	21.5823	21.6757	21.7223
Q8CFI7	DNA-directed RNA polymerase II subunit RPB2	Polr2b	10	0.173276	0.102578	19.0506	18.9516	19.0479	19.0506	19.0795	18.724	18.9826	18.9516
Q8R164	Valacyclovir hydrolase	Bphl	12	0.0803623	0.102733	23.632	23.5522	23.632	23.6649	23.5869	23.5983	23.5522	23.4923
Q9CQT1	Methylthioribose-1-phosphate isomerase	Mri1	8	-0.0756658	0.102757	20.3101	20.3538	20.343	20.265	20.3101	20.3538	20.4375	20.3538
Q9EQG9	Ceramide transfer protein	Cert1	2	0.683331	0.10312	18.8576	18.2922	18.8576	18.4375	19.1104	17.6096	18.2922	18.4536
Q8BMG7	Rab3 GTPase-activating protein non-catalytic subunit	Rab3gap2	9	0.195661	0.103223	19.7257	19.5318	19.8018	19.7257	19.5451	19.5638	19.5318	19.3899
E9Q137	Testis-expressed protein 264 homolog	Tex264	1	0.544573	0.103313	17.6869	17.4656	18.0951	17.6662	17.6869	16.8361	17.5127	17.4656
Q9ER00	Syntaxin-12	Stx12	7	0.197204	0.103321	22.0258	21.8461	22.0359	22.0156	22.0258	21.8461	21.9812	21.6584
O55135	Eukaryotic translation initiation factor 6	Eif6	5	0.169344	0.103406	20.9601	20.85	20.9601	20.9601	21.0088	20.654	20.9171	20.8499
Q9JMA1	Ubiquitin carboxyl-terminal hydrolase 14	Usp14	19	0.0516167	0.103456	21.9061	21.8346	21.9061	21.9061	21.8423	21.8538	21.8346	21.8113
P61164;Q8R5C5	Alpha-centractin	Actr1a;Actr1b	7	0.0572904	0.103475	22.3211	22.2621	22.3457	22.3073	22.3211	22.2273	22.3129	22.2621
Q3UZA1	CapZ-interacting protein	Rcsd1	11	0.164527	0.103498	21.0292	20.9098	20.9742	21.0292	21.1457	20.7715	20.9742	20.9098
Q8BTV2	Cleavage and polyadenylation specificity factor subunit 7	Cpsf7	2	0.31858	0.103597	18.6311	18.3495	18.9573	18.6311	18.4854	18.4854	18.2832	18.3495
Q6DFX2	Anthrax toxin receptor 2	Antxr2	5	-0.395458	0.103616	19.1002	19.4556	18.724	19.2581	19.1002	19.4556	19.5805	19.2326
P51881	ADP/ATP translocase 2	Slc25a5	10	0.31085	0.103838	27.5826	27.3066	27.5014	27.5826	27.6389	26.9977	27.4862	27.3066
P43406	Integrin alpha-V	Itgav	6	0.614167	0.104038	20.0691	19.6575	20.0691	19.8591	20.1457	19.6575	19.7223	18.8515
P03911	NADH-ubiquinone oxidoreductase chain 4	Mtnd4	16	-0.153618	0.104443	23.8858	24.1174	23.8764	23.8858	24.0443	24.1174	23.9933	24.1565
Q61425	Hydroxyacyl-coenzyme A dehydrogenase, mitochondrial	Hadh	21	-0.191431	0.1045	26.8385	27.0401	26.8973	26.8385	26.7645	27.1604	26.8741	27.0401
P84089	Enhancer of rudimentary homolog	Erh	1	0.44543	0.104562	18.7796	18.4211	18.7796	18.7173	19.0847	18.4211	18.724	18.1002
Q80UG5	Septin-9	Septin9	15	0.165908	0.104571	20.6276	20.5069	20.6276	20.5261	20.6886	20.5069	20.5165	20.3211
P08775	DNA-directed RNA polymerase II subunit RPB1	Polr2a	4	0.649604	0.105112	18.0319	17.4656	18.0319	17.5805	18.1703	16.7731	17.4656	17.5951
Q8VDJ3	Vigilin	Hdlbp	36	-0.172717	0.105253	21.2066	21.3645	21.1395	21.2066	21.2989	21.3645	21.5165	21.2821
P43275	Histone H1.1	H1-1	2	0.678197	0.105384	22.8932	22.2477	22.8932	22.5165	22.9153	22.5213	22.2477	21.5213
Q8K1E0	Syntaxin-5	Stx5	2	-0.511977	0.10589	17.5432	17.9024	16.8847	17.5432	17.5805	17.9024	17.6593	17.9826
Q9CR98	Protein FAM136A	Fam136a	4	0.230474	0.105927	21.2006	21.002	21.1015	21.2006	21.2707	20.7715	21.002	21.1079
Q61301	Catenin alpha-2	Ctnna2	1	4.6575	0.10593	21.6714	15.2971	21.7915	21.6714	21.632	21.4825	14.3429	15.2971
Q9R000	Integrin beta-1-binding protein 2	Itgb1bp2	3	-0.450377	0.10611	19.4854	19.9142	19.4854	19.778	19.1332	19.7257	19.9141	20.1079
Q9CXX9	CUE domain-containing protein 2	Cuedc2	3	-0.508873	0.106459	17.9083	18.2967	17.4894	18.2137	17.9083	18.2137	18.6276	18.2967
Q8BH57	WD repeat-containing protein 48	Wdr48	1	0.678442	0.106484	17.3667	16.8727	17.3667	17.1556	17.3667	16.9972	16.8727	15.9837
P97355	Spermine synthase	Sms	6	0.249226	0.106489	19.8469	19.6186	19.8469	20.0691	19.6852	19.6954	19.6186	19.5394
P06684	Complement C5	C5	5	0.277786	0.106685	18.5582	18.3709	18.5582	18.724	18.4736	18.3709	18.4616	18.0899
Q91W52	Transmembrane protein 19	Tmem19	1	0.849056	0.106763	18.7005	18.2512	18.6627	18.9854	18.7005	18.4046	18.2512	17.1457
Q8BM72	Heat shock 70 kDa protein 13	Hspa13	1	-0.716786	0.106838	16.4846	17.1946	16.4846	15.7783	16.7072	17.2877	17.1946	16.6382
Q62433	Protein NDRG1	Ndrg1	7	0.109388	0.10691	20.3538	20.2419	20.2989	20.3538	20.4576	20.2302	20.3101	20.2419
G3X972	Sec24-related gene family, member C (S. cerevisiae)	Sec24c	10	0.119935	0.106941	20.9098	20.8113	20.8191	20.9098	21.0088	20.8113	20.8113	20.7553
P10630;P60843	Eukaryotic initiation factor 4A-II	Eif4a1;Eif4a2	8	0.039011	0.106995	24.3376	24.3101	24.3239	24.3645	24.3376	24.3239	24.3101	24.275
Q8K1N2	Pleckstrin homology-like domain family B member 2	Phldb2	1	0.40634	0.107017	17.2877	17.0319	17.2877	17.1655	17.6096	17.0319	17.1457	16.6662
P18826	Phosphorylase b kinase regulatory subunit alpha, skeletal muscle isoform	Phka1	7	-0.565303	0.10736	19.3343	19.8034	18.8965	19.3343	19.4456	19.8034	19.4108	20.1581
P10605	Cathepsin B	Ctsb	10	-0.133806	0.107385	21.5638	21.6929	21.6584	21.5638	21.5213	21.8113	21.6928	21.6409
Q08857	Platelet glycoprotein 4	Cd36	13	-0.0805766	0.107417	25.5433	25.5869	25.5433	25.558	25.4892	25.5696	25.5869	25.6757
Q3TXS7	26S proteasome non-ATPase regulatory subunit 1	Psmd1	26	0.0777321	0.107417	21.8191	21.7471	21.8191	21.7675	21.8876	21.7471	21.7715	21.7223
Q9DB27	Malignant T-cell-amplified sequence 1	Mcts1	5	0.181384	0.107708	21.0426	20.8423	21.0951	21.0426	20.9951	20.7307	20.8423	21.0156
P54320	Elastin	Eln	7	0.725711	0.107732	23.0592	22.0592	22.9531	23.2185	23.0592	23.0342	21.9601	22.0592
Q8BH51	Cytochrome c oxidase assembly protein COX14	Cox14	2	-0.27481	0.107789	19.1407	19.4108	18.8727	19.2208	19.1407	19.4556	19.1922	19.4108
Q9DCT1	1,5-anhydro-D-fructose reductase	Akr1e2	11	-0.117984	0.107918	20.5915	20.68	20.6453	20.5915	20.4576	20.68	20.6627	20.7056
P55258;P61027;P61028;P62821;Q9D1G1	Ras-related protein Rab-8A	Rab10;Rab1A;Rab1b;Rab8a;Rab8b	1	0.0671234	0.108065	25.989	25.8927	26.0084	25.989	25.9517	25.8927	25.9716	25.8834
Q9CQ62	2,4-dienoyl-CoA reductase [(3E)-enoyl-CoA-producing], mitochondrial	Decr1	22	-0.201895	0.108333	26.6998	26.8974	26.7129	26.6998	26.632	27.0401	26.7129	26.8973
P52760	2-iminobutanoate/2-iminopropanoate deaminase	Rida	3	-0.619787	0.108503	19.5049	20.002	19.5049	19.5413	18.8817	20.2535	20.002	19.5318
O70433	Four and a half LIM domains protein 2	Fhl2	13	-0.664341	0.108529	23.7389	24.5285	23.6971	23.7389	24.4738	24.5285	24.3511	25.0233
P70202	Latexin	Lxn	1	0.3507	0.108573	20.0426	19.606	20.0426	19.9459	20.1332	19.4616	20.002	19.606
Q8BGV0	Probable asparagine--tRNA ligase, mitochondrial	Nars2	8	-0.305517	0.108718	20.6096	20.8423	20.68	20.6096	20.2302	20.714	20.8423	20.8802
P01898	H-2 class I histocompatibility antigen, Q10 alpha chain	H2-Q10	1	-0.430914	0.108755	20.4067	20.7796	20.0821	20.4066	20.4375	20.7796	21.0224	20.417
P07758;P22599;Q00897	Alpha-1-antitrypsin 1-1	Serpina1a;Serpina1b;Serpina1d	1	0.578742	0.108774	22.6387	22.3129	23.0608	22.6253	22.6386	22.3129	22.5451	21.7307
O08573	Galectin-9	Lgals9	4	0.213734	0.108995	19.8651	19.6988	19.8651	19.8002	20.0951	19.6988	19.6186	19.8018
P47753	F-actin-capping protein subunit alpha-1	Capza1	7	0.168476	0.109095	22.5309	22.3239	22.4196	22.6029	22.5309	22.4676	22.3239	22.2564
Q64332	Synapsin-2	Syn2	3	-0.377989	0.10913	19.3299	19.8207	19.2137	19.3299	19.6222	19.5049	19.9742	19.8207
P62858	40S ribosomal protein S28	Rps28	4	0.117947	0.109154	24.3712	24.2096	24.3712	24.4362	24.3031	24.2096	24.3376	24.2096
Q9ERU9	E3 SUMO-protein ligase RanBP2	Ranbp2	11	0.345268	0.109221	20.1206	19.5933	20.1703	19.9083	20.1206	19.5545	20.0156	19.5933
Q9CRA0	Ecto-ADP-ribosyltransferase 4	Art4	3	0.332246	0.109523	19.8066	19.4636	19.9882	19.4795	19.8066	19.4636	19.5127	19.3012
Q7TMF3	NADH dehydrogenase [ubiquinone] 1 alpha subcomplex subunit 12	Ndufa12	16	-0.119377	0.109586	26.0422	26.1984	26.0422	26.0275	26.0833	26.1984	26.0629	26.2499
A3KG59	Xaa-Arg dipeptidase	Pm20d2	8	-0.142787	0.109698	20.6006	20.7471	20.6627	20.6006	20.4874	20.7471	20.6364	20.7955
Q00724	Retinol-binding protein 4	Rbp4	2	0.370966	0.110126	20.68	20.3321	20.8802	20.68	20.4476	20.0559	20.3321	20.5069
Q62159;Q9QUI0	Rho-related GTP-binding protein RhoC	Rhoa;Rhoc	3	0.329801	0.110583	24.0359	23.7286	24.0359	23.9495	24.2096	23.4923	23.9847	23.7286
Q8R3Q2	Serine/threonine-protein phosphatase 6 regulatory subunit 2	Ppp6r2	4	0.287039	0.110601	19.7005	19.4108	19.9459	19.5768	19.7005	19.3255	19.4108	19.6258
Q8BWA5	Kelch-like protein 31	Klhl31	5	-0.228889	0.110627	19.7715	20.0426	19.5915	19.7715	19.92	20.0559	19.8712	20.0426
Q8BXQ2	GPI transamidase component PIG-T	Pigt	4	-0.226077	0.110739	18.2466	18.4252	18.3624	18.2466	18.2137	18.4252	18.3752	18.7005
P38647	Stress-70 protein, mitochondrial	Hspa9	53	-0.0568498	0.11108	25.8142	25.902	25.8312	25.8142	25.8118	25.9043	25.8215	25.902
P21958	Antigen peptide transporter 1	Tap1	5	-0.535952	0.111482	18.5988	19.002	18.6697	18.2279	18.5988	19.002	19.4395	18.6627
Q9QZ85	Interferon-inducible GTPase 1	Iigp1	14	-0.543235	0.111605	20.5069	20.9024	20.4576	20.5915	20.5069	20.9024	21.5777	20.7056
Q99KB8	Hydroxyacylglutathione hydrolase, mitochondrial	Hagh	8	0.181616	0.111713	23.0674	22.823	23.0674	23.1253	22.9707	23.0241	22.7715	22.823
P63085	Mitogen-activated protein kinase 1	Mapk1	8	0.166946	0.111727	21.5961	21.3156	21.6006	21.4375	21.5961	21.3156	21.502	21.3156
P21278	Guanine nucleotide-binding protein subunit alpha-11	Gna11	5	0.208185	0.112088	21.8614	21.6714	22.0122	21.743	21.8614	21.6714	21.5451	21.7755
A6H8H2	DENN domain-containing protein 4C	Dennd4c	4	-0.244343	0.112112	18.8238	19.0951	18.8238	18.7764	18.8936	18.8666	19.0951	19.265
Q02858;Q06806;Q61006	Angiopoietin-1 receptor	Musk;Tek;Tie1	1	-1.50801	0.112202	16.7486	18.5049	16.7486	15.8767	18.3752	18.7273	18.5049	18.2922
Q8C163	Nuclease EXOG, mitochondrial	Exog	2	0.845647	0.112219	19.5842	18.5088	19.2419	19.6954	19.5842	19.4066	18.5088	18.0691
Q8CGY6	Protein unc-45 homolog B	Unc45b	40	-0.169518	0.112277	22.2506	22.3752	22.2273	22.3073	22.2506	22.3752	22.5892	22.3294
Q6PD03	Serine/threonine-protein phosphatase 2A 56 kDa regulatory subunit alpha isoform	Ppp2r5a	14	0.184158	0.112284	22.1457	21.9916	22.3699	22.1426	22.1457	21.9777	22.1363	21.9916
Q62314	Trans-Golgi network integral membrane protein 2	Tgoln2	2	0.532592	0.112777	19.9459	19.5582	19.7828	19.9459	20.1946	19.7764	19.5582	18.9909
Q9CWK8	Sorting nexin-2	Snx2	14	0.23888	0.112837	21.9024	21.7098	21.8423	21.9024	21.9916	21.7098	21.8423	21.4676
Q91V64	Isochorismatase domain-containing protein 1	Isoc1	10	-0.102819	0.112963	22.6231	22.6865	22.6276	22.4825	22.6231	22.6475	22.7077	22.6865
Q9WUM4	Coronin-1C	Coro1c	11	0.102685	0.113134	21.6584	21.6096	21.6584	21.6276	21.7675	21.6096	21.6096	21.5261
Q8VBT0	Thioredoxin-related transmembrane protein 1	Tmx1	6	0.225639	0.113189	22.002	21.7553	21.9777	22.002	22.1457	21.6843	21.7553	22.0088
Q9CX30	Protein YIF1B	Yif1b	4	0.227797	0.11336	21.4825	21.1519	21.4825	21.2821	21.5685	21.1332	21.1519	21.3645
Q8BFY9	Transportin-1	Tnpo1	6	0.262122	0.113658	19.9601	19.5582	19.7971	19.9601	20.002	19.5299	19.8847	19.5582
P13439	Uridine 5'-monophosphate synthase	Umps	3	0.559067	0.113724	18.1507	17.3667	17.6453	18.3101	18.1507	17.3667	17.8484	17.2137
Q9WVA3	Mitotic checkpoint protein BUB3	Bub3	7	0.244476	0.113763	20.5261	20.265	20.5069	20.5261	20.6714	20.265	20.5356	20.1703
Q3TL26	Dimethyladenosine transferase 2, mitochondrial	Tfb2m	1	-0.360888	0.113766	17.5127	17.7073	17.6382	17.2419	17.5127	18.0951	17.7072	17.6731
Q8C1B7;Q9R1T4	Septin-11	Septin11;Septin6	4	0.29224	0.113857	21.9742	21.7265	22.0592	21.9243	21.9742	21.7265	21.9171	21.4375
Q9WU40	Inner nuclear membrane protein Man1	Lemd3	1	0.666349	0.113909	18.4815	18.1357	18.7987	18.3752	18.4815	18.1357	18.2419	17.2787
Q9DCG9	Multifunctional methyltransferase subunit TRM112-like protein	Trmt112	2	0.43594	0.11391	19.1679	18.8361	18.8576	19.1679	19.4736	18.8361	18.8697	18.4854
Q99KK9	Histidine--tRNA ligase, mitochondrial	Hars2	11	-0.181456	0.113919	20.2764	20.4273	20.1581	20.2764	20.3645	20.5731	20.343	20.4273
Q8VCC9	Spondin-1	Spon1	2	0.890059	0.113937	16.6382	15.7126	16.0764	16.6937	16.6382	14.8386	15.7126	16.1869
P35123;Q8R5H1	Ubiquitin carboxyl-terminal hydrolase 4	Usp15;Usp4	1	-0.46943	0.114171	20.3645	20.6714	19.9742	20.3645	20.4775	20.6714	21.0756	20.4775
Q8BPM2	Mitogen-activated protein kinase kinase kinase kinase 5	Map4k5	1	0.259575	0.114243	17.714	17.4893	17.8787	17.714	17.6453	17.4894	17.2967	17.6731
Q99JY9	Actin-related protein 3	Actr3	10	0.161129	0.114481	23.141	22.9243	23.0886	23.141	23.155	22.9243	23.1174	22.8595
Q6QD59	Vesicle transport protein SEC20	Bnip1	7	0.481877	0.114535	19.786	19.4314	20.1825	19.786	19.7764	19.4313	19.778	19.0899
Q91ZJ5	UTP--glucose-1-phosphate uridylyltransferase	Ugp2	29	-0.288201	0.1147	23.4551	23.6757	23.4425	23.5869	23.4551	24.0526	23.6209	23.6757
P62849	40S ribosomal protein S24	Rps24	6	0.115316	0.11511	23.7594	23.5869	23.7286	23.7594	23.7695	23.5869	23.7492	23.5754
Q6R0H7	Guanine nucleotide-binding protein G(s) subunit alpha isoforms XLas	Gnas	16	0.129934	0.115133	22.714	22.5522	22.7915	22.714	22.6164	22.5522	22.6562	22.5237
Q9JJ28	Protein flightless-1 homolog	Flii	12	0.21206	0.115144	20.5731	20.3857	20.5356	20.6096	20.5731	20.3857	20.5261	20.1703
Q9D1G5	Leucine-rich repeat-containing protein 57	Lrrc57	3	0.172424	0.115191	20.1079	19.9054	19.9882	20.2419	20.1079	20.0292	19.8861	19.9054
P47964	60S ribosomal protein L36	Rpl36	3	0.185392	0.115299	23.2535	23.1565	23.2535	23.2361	23.4041	22.9654	23.2155	23.1565
Q6PHN9	Ras-related protein Rab-35	Rab35	9	0.168161	0.115703	20.2535	20.0691	20.2419	20.2535	20.3857	20.0426	20.265	20.0691
Q9D517	1-acyl-sn-glycerol-3-phosphate acyltransferase gamma	Agpat3	14	0.0579472	0.115974	22.5615	22.5069	22.5404	22.5938	22.5615	22.5498	22.4651	22.5069
Q9DB15	39S ribosomal protein L12, mitochondrial	Mrpl12	7	0.212174	0.116063	23.5404	23.2302	23.4551	23.5404	23.5522	23.1765	23.2302	23.5045
P62746;Q62159	Rho-related GTP-binding protein RhoB	Rhob;Rhoc	1	0.296961	0.116215	18.0847	17.7796	17.9714	18.0847	18.3836	17.7796	18.0156	17.7537
P21614	Vitamin D-binding protein	Gc	8	0.343194	0.116277	21.3484	20.9243	21.1395	21.3484	21.3645	20.68	21.2185	20.9243
Q8K2B3	Succinate dehydrogenase [ubiquinone] flavoprotein subunit, mitochondrial	Sdha	34	-0.0887788	0.116474	26.3528	26.4441	26.3443	26.3712	26.3528	26.4441	26.3695	26.521
O35379	Multidrug resistance-associated protein 1	Abcc1	15	0.19487	0.116549	19.8018	19.5185	19.8499	19.8018	19.7731	19.5185	19.8034	19.5185
Q3TCN2	Putative phospholipase B-like 2	Plbd2	2	-0.467279	0.116644	18.4775	19.1704	18.3233	18.4775	18.9054	19.1703	19.2137	18.724
Q80X50	Ubiquitin-associated protein 2-like	Ubap2l	15	0.143863	0.1167	20.417	20.343	20.5069	20.417	20.3962	20.3752	20.343	20.1703
A6X935	Inter alpha-trypsin inhibitor, heavy chain 4	Itih4	20	0.511409	0.11682	21.6006	21.1015	21.4066	21.9388	21.6006	21.1015	21.5069	20.8034
Q8BX70	Intermembrane lipid transfer protein VPS13C	Vps13c	38	-0.0988801	0.116885	21.1206	21.2361	21.1206	21.1457	21.0821	21.2361	21.2821	21.1269
P51855	Glutathione synthetase	Gss	10	0.151726	0.11703	21.6671	21.5731	21.6671	21.743	21.5915	21.5823	21.5731	21.391
Q8VCI5	Peroxisomal biogenesis factor 19	Pex19	1	0.716687	0.11706	18.4211	17.8846	18.4211	18.2967	19.0664	17.4087	17.8847	18.3408
Q80VP0	Tectonin beta-propeller repeat-containing protein 1	Tecpr1	5	0.636396	0.117222	19.4252	18.8484	19.5394	19.0074	19.4252	19.0638	18.8484	18.1507
P35235	Tyrosine-protein phosphatase non-receptor type 11	Ptpn11	25	0.116665	0.117301	22.0459	21.9134	22.0459	22.0493	22.0459	22.0393	21.8385	21.9134
Q80TV8	CLIP-associating protein 1	Clasp1	36	-0.104357	0.117564	20.2764	20.4067	20.2419	20.2764	20.343	20.4066	20.4576	20.3101
Q9QXY6;Q9WVK4	EH domain-containing protein 3	Ehd1;Ehd3	9	-0.0698764	0.117978	23.2155	23.2821	23.1901	23.2258	23.2155	23.2821	23.2214	23.3376
Q80ZX0	Sec24-related gene family, member B (S. cerevisiae)	Sec24b	6	0.381711	0.118108	19.4456	19.185	19.6382	19.4456	19.2832	19.185	19.2832	18.7537
Q9JJ00	Phospholipid scramblase 1	Plscr1	3	0.276201	0.118213	19.265	18.9402	19.265	19.4354	18.9601	18.9402	18.9573	18.9344
Q9CRB9	MICOS complex subunit Mic19	Chchd3	16	-0.0952479	0.11833	25.1908	25.2679	25.1908	25.1757	25.2643	25.2643	25.2678	25.3844
O35857	Mitochondrial import inner membrane translocase subunit TIM44	Timm44	25	-0.137982	0.118372	22.2243	22.2933	22.1703	22.2244	22.2244	22.2933	22.2621	22.4775
Q9JJZ2	Tubulin alpha-8 chain	Tuba8	7	-0.101173	0.1184	23.848	23.976	23.7895	23.8858	23.8481	23.8576	23.976	23.9933
Q921L3	Calcium load-activated calcium channel	Tmco1	4	0.121744	0.118508	21.2707	21.1269	21.2707	21.2593	21.2707	21.1269	21.2593	21.0493
P10833;P62071	Ras-related protein R-Ras	Rras;Rras2	3	0.381124	0.118694	23.0359	22.6453	23.2821	23.0359	22.6518	22.6865	22.6453	22.4947
Q8R5C5	Beta-centractin	Actr1b	4	0.350392	0.119001	20.9742	20.6276	20.9742	20.9812	20.6453	20.6276	20.68	20.2419
P97370	Sodium/potassium-transporting ATPase subunit beta-3	Atp1b3	6	-0.160191	0.119163	23.1688	23.391	23.1688	23.1688	23.2961	23.2434	23.48	23.391
O55222	Integrin-linked protein kinase	Ilk	19	0.111876	0.119228	23.1174	22.9654	23.1238	23.1158	23.1174	22.9654	23.119	22.937
Q99LC3	NADH dehydrogenase [ubiquinone] 1 alpha subcomplex subunit 10, mitochondrial	Ndufa10	24	-0.119523	0.119317	26.7129	26.8264	26.7129	26.6865	26.726	26.8264	26.726	26.9316
P35550	rRNA 2'-O-methyltransferase fibrillarin	Fbl	10	0.206991	0.119355	22.7655	22.5069	22.7655	22.7389	22.7735	22.3988	22.7512	22.5069
Q00896	Alpha-1-antitrypsin 1-3	Serpina1c	1	-0.86106	0.119363	17.1155	18.1307	17.6024	17.0211	17.1155	18.1307	18.7828	17.4087
Q62009	Periostin	Postn	25	0.939183	0.1194	22.8746	21.8152	22.8073	23.1206	22.8745	21.8152	22.8764	21.2933
P61982;P68254;P68510;Q9CQV8	14-3-3 protein gamma	Ywhab;Ywhag;Ywhah;Ywhaq	1	0.0777461	0.119517	24.6096	24.5345	24.6096	24.6376	24.5983	24.5344	24.604	24.4738
P06797	Procathepsin L	Ctsl	2	-0.750715	0.119793	17.8238	18.3878	17.0638	17.8484	17.8238	18.7828	18.3879	17.8175
Q9D0M1	Phosphoribosyl pyrophosphate synthase-associated protein 1	Prpsap1	4	0.470928	0.1198	19.8144	19.209	19.8144	19.9601	19.4313	18.9854	19.5988	19.209
P30999	Catenin delta-1	Ctnnd1	22	0.163453	0.119816	21.6409	21.4923	21.6409	21.6364	21.7512	21.4923	21.6497	21.3962
Q9R0L7	A-kinase anchor protein 8-like	Akap8l	2	0.579559	0.120236	18.1002	17.6937	18.0373	18.1002	18.3794	17.6937	18.0102	17.0743
P47740	Aldehyde dehydrogenase family 3 member A2	Aldh3a2	11	0.107545	0.120262	21.2066	21.1015	21.1886	21.2066	21.2066	21.1825	21.1015	20.9951
Q6PDH0	Pleckstrin homology-like domain family B member 1	Phldb1	15	-0.136058	0.120295	19.9601	20.1206	20.0951	19.9316	19.9601	20.1206	20.2185	20.0559
Q99PW4	EKC/KEOPS complex subunit Tp53rkb	Tp53rkb	2	0.598909	0.120327	19.8018	19.2018	19.8018	19.1946	20.1825	19.2489	19.2018	18.9316
Q99JW4	LIM and senescent cell antigen-like-containing domain protein 1	Lims1	4	0.633784	0.120362	23.1441	22.7594	23.2051	22.9116	23.1441	21.8346	22.7655	22.7594
O70591	Prefoldin subunit 2	Pfdn2	5	0.0925789	0.120385	21.4273	21.3266	21.4015	21.4273	21.4576	21.265	21.3266	21.417
Q9DBJ1	Phosphoglycerate mutase 1	Pgam1	10	0.187266	0.120561	24.9406	24.7796	24.7796	25.019	24.9406	24.7995	24.7796	24.5983
Q9CQA1	Trafficking protein particle complex subunit 5	Trappc5	4	0.101929	0.120561	20.8727	20.7553	20.9171	20.7876	20.8727	20.6971	20.8191	20.7553
Q8BFP9;Q9JK42	[Pyruvate dehydrogenase (acetyl-transferring)] kinase isozyme 1, mitochondrial	Pdk1;Pdk2	1	0.118095	0.120585	23.9043	23.7594	23.976	23.9043	23.8385	23.8764	23.7594	23.7286
Q8CAQ8	MICOS complex subunit Mic60	Immt	65	-0.0444673	0.120591	27.4234	27.4551	27.4473	27.4234	27.4073	27.4551	27.4473	27.509
O09118	Netrin-1	Ntn1	1	0.677151	0.120632	16.8238	16.528	16.7471	16.8238	17.3581	15.7313	16.528	16.6382
Q60935	GPI-linked NAD(P)(+)--arginine ADP-ribosyltransferase 1	Art1	3	-0.333687	0.120707	19.002	19.2232	19.1104	18.5694	19.002	19.2967	19.2232	19.163
G5E897	Protein O-glucosyltransferase 3	Poglut3	6	0.387305	0.120787	19.4004	19.1357	19.1994	19.528	19.4004	19.185	19.1357	18.6453
P26883	Peptidyl-prolyl cis-trans isomerase FKBP1A	Fkbp1a	6	0.273406	0.120892	24.9271	24.5285	24.7645	24.9933	24.9271	24.5285	24.8623	24.4738
P63328	Protein phosphatase 3 catalytic subunit alpha	Ppp3ca	8	0.12574	0.120909	21.9951	21.9243	22.0789	21.9951	21.9424	21.9352	21.9243	21.7796
Q9D7N9	Adipocyte plasma membrane-associated protein	Apmap	13	-0.0699635	0.121004	20.7876	20.8727	20.7553	20.7876	20.8727	20.8727	20.8651	20.8876
A0A0A6YXW6	Immunoglobulin heavy constant alpha (Fragment)	Igha	4	0.84399	0.121146	22.7056	21.7307	23.4298	22.7056	22.6029	22.7533	21.7307	21.7223
Q68FF6;Q9JLQ2	ARF GTPase-activating protein GIT1	Git1;Git2	3	0.172386	0.121414	19.3343	19.2255	19.2396	19.3343	19.4616	19.2255	19.2396	19.0532
P47757	F-actin-capping protein subunit beta	Capzb	16	-0.053943	0.121597	23.9043	23.9406	23.8764	23.9043	23.9225	23.9406	23.9225	24.002
Q8K1R3	Polyribonucleotide nucleotidyltransferase 1, mitochondrial	Pnpt1	18	-0.0601037	0.121623	21.1206	21.1581	21.1519	21.1206	21.0756	21.2185	21.1581	21.1519
E9Q0S6	Tensin 1	Tns1	54	0.110735	0.121797	23.1441	23.0476	23.2506	23.0772	23.1441	23.002	23.0902	23.0476
Q9WUR2	Enoyl-CoA delta isomerase 2	Eci2	10	-0.124382	0.121894	23.3239	23.4923	23.3376	23.3101	23.3239	23.4923	23.3239	23.5285
O54946	DnaJ homolog subfamily B member 6	Dnajb6	7	0.222219	0.122021	20.5638	20.4676	20.714	20.5165	20.5638	20.4775	20.4676	20.1825
Q8VED9	Galectin-related protein	Lgalsl	2	1.88777	0.122116	18.3101	15.6953	17.7207	18.8757	18.3101	15.6953	15.3341	18.2137
B1AY13	Ubiquitin carboxyl-terminal hydrolase 24	Usp24	18	-0.212379	0.12218	19.5318	19.7553	19.3559	19.5318	19.5823	19.7553	19.8144	19.5375
Q62093	Serine/arginine-rich splicing factor 2	Srsf2	5	0.116831	0.122712	22.2125	22.0789	22.1703	22.2125	22.2332	21.9951	22.1916	22.0789
Q91WC3	Long-chain-fatty-acid--CoA ligase 6	Acsl6	9	-0.543225	0.122781	19.2042	19.5413	19.2042	18.7987	19.2719	20.0821	19.5413	19.2809
P97290	Plasma protease C1 inhibitor	Serping1	9	0.141417	0.123068	19.9459	19.7356	19.9601	19.856	19.9459	19.6954	19.9068	19.7356
P13542;Q02566;Q91Z83	Myosin-8	Myh6;Myh7;Myh8	4	-0.146172	0.123103	29.8608	29.9814	29.8608	29.7708	29.8756	29.9814	29.8653	30.099
Q8BH79	Anoctamin-10	Ano10	4	0.800973	0.123137	19.0769	18.417	19.0769	19.3516	18.7173	18.417	18.7828	17.5432
Q91WT7	3-alpha-hydroxysteroid dehydrogenase type 1	Akr1c14	2	0.338577	0.123471	18.2419	17.9316	18.2419	18.185	18.3794	17.6453	17.9316	18.2137
Q9WVJ2	26S proteasome non-ATPase regulatory subunit 13	Psmd13	18	0.0901845	0.123572	22.1457	22.0756	22.0951	22.1457	22.2361	22.0292	22.1015	22.0756
Q61559	IgG receptor FcRn large subunit p51	Fcgrt	2	0.155685	0.123694	19.0743	18.9909	19.1874	19.0743	19.0453	19.0346	18.8144	18.9909
Q62407	Striated muscle-specific serine/threonine-protein kinase	Speg	73	-0.0648499	0.123861	22.1673	22.2621	22.2332	22.1642	22.1673	22.2621	22.2905	22.2066
P14148	60S ribosomal protein L7	Rpl7	16	0.128701	0.123923	23.5285	23.391	23.4551	23.5285	23.6096	23.3239	23.4923	23.391
Q8R2G4	Ecto-ADP-ribosyltransferase 3	Art3	16	0.273408	0.123942	23.7796	23.5285	23.8858	23.7389	23.7796	23.2961	23.5285	23.7594
Q9QYR9	Acyl-coenzyme A thioesterase 2, mitochondrial	Acot2	13	-0.135514	0.124013	24.141	24.2961	24.141	24.141	24.0772	24.3443	24.1253	24.2961
P28700;P28704;P28705	Retinoic acid receptor RXR-alpha	Rxra;Rxrb;Rxrg	2	-0.558866	0.124069	17.6453	18.3012	17.977	17.6453	17.1556	18.3233	18.3012	17.83
E9PZQ0;E9Q401	Ryanodine receptor 1	Ryr1;Ryr2	10	-0.174208	0.124158	23.391	23.5045	23.4298	23.3778	23.391	23.4676	23.5045	23.7492
O55137;Q9QYR9	Acyl-coenzyme A thioesterase 1	Acot1;Acot2	10	-0.148991	0.124344	25.6703	25.7745	25.6703	25.6811	25.5492	25.8973	25.6757	25.7746
Q922Q4;Q922W5	Pyrroline-5-carboxylate reductase 2	Pycr1;Pycr2	1	0.903155	0.124433	17.8423	16.7987	17.8423	17.7072	18.5731	16.7987	17.8965	16.718
Q91ZM2	SH2B adapter protein 1	Sh2b1	1	2.6009	0.12452	18.8175	15.993	18.2042	18.8175	19.0769	15.993	18.4293	13.8736
O35326	Serine/arginine-rich splicing factor 5	Srsf5	5	0.383205	0.124634	19.9243	19.786	20.2302	19.9243	19.9243	19.786	19.8377	19.3056
P68368;Q9JJZ2	Tubulin alpha-4A chain	Tuba4a;Tuba8	10	0.0810725	0.125114	26.5609	26.4892	26.5404	26.5754	26.5609	26.4892	26.5419	26.4024
Q70KF4	Cardiomyopathy-associated protein 5	Cmya5	59	-0.14559	0.125141	21.5777	21.7471	21.5777	21.6714	21.4526	21.7594	21.7471	21.632
Q8BVY0	Ribosomal L1 domain-containing protein 1	Rsl1d1	4	0.400578	0.12515	19.4656	19.0102	19.2604	19.4656	19.8113	19.3709	19.0102	18.9545
Q6ZPE2	Myotubularin-related protein 5	Sbf1	2	-0.452138	0.12523	17.9601	18.185	17.3581	18.0265	17.9601	18.185	18.4211	18.0951
P98192	Dihydroxyacetone phosphate acyltransferase	Gnpat	18	-0.167552	0.125231	20.6006	20.7876	20.6627	20.6006	20.5823	20.7876	20.6364	20.9243
Q9CZA6	Nuclear distribution protein nudE homolog 1	Nde1	5	0.295169	0.125242	18.0532	17.7667	17.8965	18.0532	18.1752	17.7667	17.9601	17.5127
Q8R307	Vacuolar protein sorting-associated protein 18 homolog	Vps18	5	0.191964	0.125372	19.1104	18.9992	19.1104	19.1079	19.1703	18.9992	19.0664	18.7471
Q8BWQ6	VPS35 endosomal protein-sorting factor-like	Vps35l	9	0.227125	0.125681	19.1946	19.0238	19.0769	19.4252	19.1946	19.0238	19.0951	18.8965
Q99K01	Pyridoxal-dependent decarboxylase domain-containing protein 1	Pdxdc1	2	1.0054	0.125706	20.1581	19.6593	20.1457	20.2989	20.1581	19.6593	19.7667	18.1605
Q9D0J8	Parathymosin	Ptms	3	0.276548	0.125726	22.4451	22.1976	22.4144	22.4701	22.4451	21.9061	22.3962	22.1976
Q9CQJ8	NADH dehydrogenase [ubiquinone] 1 beta subcomplex subunit 9	Ndufb9	11	-0.134247	0.125958	25.705	25.848	25.705	25.705	25.8385	25.8481	25.8142	25.989
P26041;P26043	Moesin	Msn;Rdx	2	0.461924	0.125967	24.1565	23.8288	24.0105	24.1565	24.2317	23.217	23.9672	23.8288
Q9WTX2	Interferon-inducible double-stranded RNA-dependent protein kinase activator A	Prkra	2	0.453836	0.126055	17.3752	17.0211	17.3752	17.0532	17.6311	17.1053	16.5716	17.0211
P63325	40S ribosomal protein S10	Rps10	10	0.098327	0.126133	24.217	24.1719	24.217	24.2021	24.3443	24.1719	24.1871	24.1095
Q9Z1Z0	General vesicular transport factor p115	Uso1	19	0.157751	0.126225	21.895	21.7265	21.9024	21.895	21.895	21.7265	21.8876	21.6051
Q8C1Q6	Small integral membrane protein 4	Smim4	2	0.390614	0.126257	20.6276	20.343	20.6627	20.6276	20.6006	19.8499	20.343	20.5261
Q8VDM6	Heterogeneous nuclear ribonucleoprotein U-like protein 1	Hnrnpul1	9	0.306345	0.126268	20.1581	19.7844	20.1332	20.2764	20.1581	19.7844	20.1825	19.6818
Q9WUZ5	Troponin I, slow skeletal muscle	Tnni1	3	2.4381	0.126348	20.6628	18.528	20.6627	20.7389	20.3645	18.528	20.1206	15.8033
F8VQC1	Signal recognition particle subunit SRP72	Srp72	11	-0.0703506	0.126398	19.4375	19.5337	19.4375	19.5165	19.4293	19.4894	19.5337	19.5713
O70310	Glycylpeptide N-tetradecanoyltransferase 1	Nmt1	11	-0.101799	0.126506	21.0691	21.1825	21.0359	21.0691	21.1143	21.0886	21.2535	21.1825
P61953	Guanine nucleotide-binding protein G(I)/G(S)/G(O) subunit gamma-11	Gng11	1	0.333778	0.126539	20.0156	19.8484	20.0156	20.002	20.2419	19.4496	19.9601	19.8484
Q9CQ02	COMM domain-containing protein 4	Commd4	1	0.8856	0.126599	17.5805	17.0951	17.5805	17.5204	18.1605	16.068	17.4415	17.0951
F2Z3U3	Ras association (RalGDS/AF-6) and pleckstrin homology domains 1	Raph1	13	-0.226978	0.126606	19.6505	19.8361	19.3815	19.6505	19.7273	19.7106	19.8936	19.8361
Q9CXJ4	Mitochondrial potassium channel ATP-binding subunit	Abcb8	24	-0.0897032	0.126607	22.8557	22.9795	22.9707	22.8385	22.8557	22.9406	22.9795	23.0139
Q8R5G7	Arf-GAP with Rho-GAP domain, ANK repeat and PH domain-containing protein 3	Arap3	1	0.642867	0.126697	18.1407	17.3752	18.1407	18.4415	17.9373	18.1104	17.3752	17.1053
P27600	Guanine nucleotide-binding protein subunit alpha-12	Gna12	2	0.477742	0.126723	18.2604	17.786	18.2604	18.4087	18.1053	17.3752	18.1801	17.786
Q9CYN2	Signal peptidase complex subunit 2	Spcs2	5	0.186081	0.126824	21.4576	21.1825	21.5213	21.3645	21.4576	21.1703	21.4324	21.1825
O08911	Mitogen-activated protein kinase 12	Mapk12	7	0.266313	0.126845	20.1825	19.8906	20.1946	20.1825	20.0691	19.8906	20.1079	19.6488
Q8CFY5	Protoheme IX farnesyltransferase, mitochondrial	Cox10	1	-1.34399	0.12701	16.0554	17.4004	14.726	16.0554	16.9882	16.7987	17.4004	17.6024
Q00623	Apolipoprotein A-I	Apoa1	19	-0.175449	0.127132	24.5812	24.824	24.5225	24.6649	24.5812	24.604	24.824	24.867
Q7TQ48	Sarcalumenin	Srl	40	0.0921071	0.127254	27.8142	27.673	27.8142	27.8324	27.7518	27.6595	27.673	27.7895
Q8VCN9	Tubulin-specific chaperone C	Tbcc	7	0.314409	0.127362	19.0664	18.8454	18.8995	19.265	19.0664	18.8454	18.9258	18.5165
P56812	Programmed cell death protein 5	Pdcd5	5	0.310736	0.127455	22.1206	21.9352	21.9951	22.1206	22.1886	21.4874	21.9352	21.9495
P13541;P13542;P46735;Q02566;Q5SX40;Q91Z83	Myosin-3	Myh1;Myh3;Myh6;Myh7;Myh8;Myo1b	1	2.01273	0.127519	18.2741	15.624	18.2741	17.5432	18.624	15.624	14.7153	18.0638
Q9CZX7	Type 2 phosphatidylinositol 4,5-bisphosphate 4-phosphatase	Pip4p2	2	0.359379	0.127561	19.8515	19.7106	19.8499	19.8515	20.1581	19.7876	19.7106	19.2832
O09114	Prostaglandin-H2 D-isomerase	Ptgds	1	-2.10031	0.127686	16.8362	19.197	15.7207	18.6593	16.8361	20.343	17.977	19.197
O88448	Kinesin light chain 2	Klc2	3	0.606495	0.128118	18.3962	17.9714	18.7828	17.977	18.3962	17.3495	18.0156	17.9714
P63028	Translationally-controlled tumor protein	Tpt1	6	0.0851269	0.128211	23.5638	23.5165	23.5754	23.5522	23.5638	23.391	23.5165	23.5285
Q99JX3	Golgi reassembly-stacking protein 2	Gorasp2	7	0.19419	0.128261	20.2419	20.0292	20.1206	20.2419	20.343	20.0292	20.1825	19.9112
Q3UDE2	Tubulin--tyrosine ligase-like protein 12	Ttll12	6	0.276914	0.128435	20.4676	20.1457	20.4676	20.5069	20.4676	20.4775	20.1457	19.9882
Q9QUI0	Transforming protein RhoA	Rhoa	4	0.305142	0.128485	21.5069	21.0886	21.3101	21.5356	21.5069	21.0886	21.417	20.9316
Q61176	Arginase-1	Arg1	2	-1.28485	0.128583	17.977	18.68	16.7072	17.977	18.3145	18.3233	18.68	19.8499
P17182;P17183;P21550	Alpha-enolase	Eno1;Eno2;Eno3	3	0.0631523	0.128653	27.7129	27.6663	27.7129	27.7064	27.726	27.6998	27.5898	27.6663
Q9D819	Inorganic pyrophosphatase	Ppa1	13	-0.0759169	0.128901	22.7856	22.8708	22.7856	22.8633	22.7553	22.8708	22.9207	22.8404
Q920M5	Coronin-6	Coro6	7	0.336606	0.128911	21.7675	21.3156	21.7675	21.928	21.417	21.5451	21.3156	21.2419
Q3TC72	Fumarylacetoacetate hydrolase domain-containing protein 2A	Fahd2	7	-0.212544	0.129044	23.178	23.4298	23.178	23.2258	22.9916	23.4298	23.1734	23.4298
Q8CIZ8	von Willebrand factor	Vwf	13	0.234716	0.129206	20.3321	20.0559	20.0691	20.3321	20.4676	20.0559	19.9882	20.1206
P49312;Q8BG05	Heterogeneous nuclear ribonucleoprotein A1	Hnrnpa1;Hnrnpa3	1	0.345881	0.129431	19.895	19.417	19.6954	19.895	19.9243	19.417	19.2489	19.8113
Q6DFW4	Nucleolar protein 58	Nop58	10	0.271169	0.129609	20.4375	20.0292	20.4375	20.5165	20.2764	20.002	20.3857	20.0292
Q9CQY1	Ubiquitin-like protein ATG12	Atg12	1	0.91532	0.129819	17.5356	16.7798	17.6593	17.5049	17.5356	15.7654	17.4087	16.7798
P62855	40S ribosomal protein S26	Rps26	3	0.142647	0.129985	23.9933	23.8093	23.9933	23.9134	24.0772	23.8093	23.9672	23.7796
P46638	Ras-related protein Rab-11B	Rab11b	13	0.0778859	0.130004	23.8093	23.7492	23.8385	23.8093	23.7995	23.7492	23.7995	23.6649
Q9CQY5	Magnesium transporter protein 1	Magt1	5	-0.240521	0.130104	19.2255	19.4004	18.963	19.2255	19.3211	19.2989	19.5318	19.4004
Q5FW52	Muscular LMNA-interacting protein	Mlip	11	0.128483	0.130114	23.0476	22.9334	23.0592	23.0476	22.9477	22.9601	22.9334	22.7755
Q3UGC7;Q66JS6	Eukaryotic translation initiation factor 3 subunit J-A	Eif3j1;Eif3j2	7	-0.052468	0.130164	21.1457	21.2125	21.1457	21.1395	21.2185	21.2125	21.2066	21.2419
O35495;Q04735	Cyclin-dependent kinase 14	Cdk14;Cdk16	1	0.652808	0.130314	16.9316	15.9454	16.9316	17.1053	16.624	15.8965	16.8606	15.9453
Q80W21	Glutathione S-transferase Mu 7	Gstm7	6	-0.245253	0.130344	22.0224	22.2961	22.0224	21.8839	22.0951	22.0292	22.2961	22.4118
Q9R049	E3 ubiquitin-protein ligase AMFR	Amfr	1	0.400524	0.130504	19.6204	19.4129	19.7422	19.4874	19.6204	19.4149	19.4129	18.8207
Q9WVA4	Transgelin-2	Tagln2	16	0.221196	0.130675	24.5754	24.3376	24.5285	24.5754	24.7746	24.2961	24.5812	24.3376
Q9DB77	Cytochrome b-c1 complex subunit 2, mitochondrial	Uqcrc2	25	-0.0951379	0.130684	28.4433	28.5573	28.4433	28.4629	28.4274	28.5573	28.4473	28.6146
Q9WVK4	EH domain-containing protein 1	Ehd1	21	-0.0598698	0.130693	23.48	23.5045	23.4676	23.48	23.48	23.5045	23.5045	23.5983
Q8QZS1	3-hydroxyisobutyryl-CoA hydrolase, mitochondrial	Hibch	24	-0.131925	0.130875	24.5638	24.6375	24.5638	24.5754	24.5045	24.8093	24.5926	24.6376
Q8BGF0	Expressed sequence AW551984	AW551984	1	0.22309	0.131054	21.6186	21.4676	21.8073	21.6186	21.5731	21.4676	21.5915	21.2707
Q80WC7	Arf-GAP domain and FG repeat-containing protein 2	Agfg2	1	0.879738	0.131146	19.3624	18.5394	19.3624	19.1728	19.5951	17.7005	19.2512	18.5394
Q9DD02	Protein Hikeshi	Hikeshi	1	-0.365873	0.131189	17.7471	18.0585	17.9992	17.7471	17.3495	18.1357	17.9992	18.0585
Q2NL51	Glycogen synthase kinase-3 alpha	Gsk3a	3	0.119975	0.13119	20.2066	20.1457	20.3962	20.2066	20.2066	20.1457	20.1581	20.1457
Q99KF1	Transmembrane emp24 domain-containing protein 9	Tmed9	6	0.177818	0.131406	22.1673	21.9061	22.1673	22.1426	22.1765	21.8764	22.1703	21.9061
P09671	Superoxide dismutase [Mn], mitochondrial	Sod2	11	-0.09202	0.131497	27.2445	27.3662	27.2803	27.2445	27.2262	27.4073	27.2535	27.3662
P53811	Phosphatidylinositol transfer protein beta isoform	Pitpnb	8	0.118252	0.131988	20.6096	20.417	20.6364	20.4972	20.6096	20.417	20.5545	20.417
Q9D8E6	60S ribosomal protein L4	Rpl4	19	0.165778	0.132295	24.317	24.1095	24.1719	24.317	24.3844	24.0275	24.239	24.1095
Q8C0L0	Thioredoxin-related transmembrane protein 4	Tmx4	4	0.140893	0.132326	21.6409	21.4775	21.7675	21.6409	21.5915	21.4775	21.632	21.4676
P24472	Glutathione S-transferase A4	Gsta4	10	-0.108121	0.132659	23.4425	23.5404	23.4676	23.4425	23.4041	23.6431	23.4551	23.5404
Q8BJW6	Eukaryotic translation initiation factor 2A	Eif2a	9	-0.150312	0.132866	20.8346	20.9388	20.9316	20.8346	20.6886	21.0426	20.9243	20.9388
P48025	Tyrosine-protein kinase SYK	Syk	3	0.727075	0.132878	18.8936	17.9142	18.8936	18.6593	19.0211	18.8545	17.9141	17.624
Q6Q899	Antiviral innate immune response receptor RIG-I	Ddx58	5	0.509537	0.133107	19.5088	18.8269	19.4435	19.5088	19.6645	18.8269	19.5508	18.7106
Q9CWU6	Ubiquinol-cytochrome-c reductase complex assembly factor 1	Uqcc1	7	-0.154568	0.133168	21.6051	21.85	21.5685	21.6051	21.7796	21.7056	21.8499	21.8614
Q3U0S6	Ras-interacting protein 1	Rasip1	17	-0.115701	0.133437	20.7553	20.8651	20.7553	20.6627	20.8191	20.9316	20.8651	20.7876
A0A0U1RNF2	Leucine carboxyl methyltransferase 1	Lcmt1	5	0.27172	0.133581	21.4526	21.0088	21.3156	21.4626	21.4526	20.9951	21.4118	21.0088
B1AUN2	Eukaryotic translation initiation factor 2B, subunit 3	Eif2b3	6	0.180952	0.133598	19.6258	19.4676	19.6783	19.6258	19.5356	19.4676	19.562	19.2673
Q8BJ03	Cytochrome c oxidase assembly protein COX15 homolog	Cox15	8	-0.0790005	0.134178	21.5404	21.6006	21.5404	21.5869	21.5069	21.5777	21.6006	21.6928
Q9CQ85	Mitochondrial import inner membrane translocase subunit Tim22	Timm22	1	-0.191139	0.134411	21.3211	21.4676	21.3211	21.3857	21.1642	21.6231	21.3538	21.4676
Q9Z2Y8	Pyridoxal phosphate homeostasis protein	Plpbp	9	-0.0826308	0.134514	22.3884	22.4601	22.417	22.3805	22.3884	22.5592	22.4601	22.4144
P97461	40S ribosomal protein S5	Rps5	8	0.290525	0.134798	23.2961	22.9548	23.1734	23.2961	23.3511	22.7451	23.2492	22.9548
O88623	Ubiquitin carboxyl-terminal hydrolase 2	Usp2	2	-0.585299	0.134923	17.4576	17.9431	16.9316	17.4576	17.6096	18.3145	17.4972	17.9431
D3Z7P3	Glutaminase kidney isoform, mitochondrial	Gls	16	0.29419	0.13516	21.8651	21.4221	21.7836	21.9316	21.8651	21.8689	21.4221	21.4066
P14152	Malate dehydrogenase, cytoplasmic	Mdh1	22	-0.107487	0.135182	29.8741	29.9539	29.9259	29.8564	29.8741	29.9259	29.9539	30.099
Q99L27	GMP reductase 2	Gmpr2	4	0.485422	0.135335	20.6971	20.0559	20.6971	20.8269	20.343	20.5451	20.0559	19.8097
Q61151	Serine/threonine-protein phosphatase 2A 56 kDa regulatory subunit epsilon isoform	Ppp2r5e	5	0.334394	0.135539	20.3211	19.9459	20.3211	20.343	20.0951	19.9459	20.1825	19.6276
P98197	Phospholipid-transporting ATPase IH	Atp11a	4	0.255866	0.135553	18.9459	18.7173	19.2627	18.8606	18.9459	18.7173	18.6937	18.8906
O08529	Calpain-2 catalytic subunit	Capn2	23	0.122747	0.135568	22.3321	22.2332	22.3184	22.3376	22.3321	22.3045	22.2332	22.0821
P07758;P22599;Q00896;Q00897	Alpha-1-antitrypsin 1-1	Serpina1a;Serpina1b;Serpina1c;Serpina1d	2	0.194201	0.135808	26.8858	26.673	26.7645	26.9089	26.8858	26.4892	26.8142	26.673
P21279	Guanine nucleotide-binding protein G(q) subunit alpha	Gnaq	6	0.155659	0.136035	21.1015	20.9672	21.1332	21.1015	20.9672	20.7796	20.9882	20.9672
P97930	Thymidylate kinase	Dtymk	8	-0.171824	0.136121	20.4676	20.5915	20.4775	20.3538	20.4676	20.7553	20.4676	20.5915
Q9DCB1	High mobility group nucleosome-binding domain-containing protein 3	Hmgn3	2	0.422742	0.136771	18.1002	17.5356	18.3277	18.1002	18.0743	17.5356	18.1703	17.528
P70404	Isocitrate dehydrogenase [NAD] subunit gamma 1, mitochondrial	Idh3g	16	-0.0611483	0.137139	25.317	25.3975	25.3066	25.3376	25.317	25.3975	25.3205	25.4266
Q8R1S0	Ubiquinone biosynthesis monooxygenase COQ6, mitochondrial	Coq6	16	-0.121723	0.137193	23.4923	23.654	23.4923	23.48	23.5165	23.654	23.4923	23.7077
Q9WV02	RNA-binding motif protein, X chromosome	Rbmx	14	0.169971	0.137273	22.2332	22.0592	22.2332	22.1856	22.2961	21.9243	22.2214	22.0592
O35678	Monoglyceride lipase	Mgll	9	-0.152307	0.137564	22.2214	22.4144	22.1765	22.3156	22.2214	22.4144	22.2564	22.4996
Q9D823	60S ribosomal protein L37	Rpl37	3	0.119614	0.137596	19.9054	19.8408	19.9882	19.9054	19.8787	19.6954	19.8772	19.8408
O35685	Nuclear migration protein nudC	Nudc	17	-0.137113	0.137714	21.3538	21.417	21.2302	21.3538	21.3857	21.417	21.5731	21.391
Q99KH8	Serine/threonine-protein kinase 24	Stk24	9	0.138441	0.137778	20.417	20.2535	20.4676	20.2535	20.417	20.2989	20.2535	20.1703
Q99KI3	ER membrane protein complex subunit 3	Emc3	7	-0.0959326	0.138121	21.2933	21.4425	21.2933	21.2933	21.4425	21.4118	21.4425	21.4626
Q8BPB0;Q921Y0	MOB kinase activator 1B	Mob1a;Mob1b	3	0.0953649	0.138386	20.7471	20.6628	20.7389	20.7471	20.8727	20.6627	20.7471	20.6627
Q8R3V5;Q9JK48	Endophilin-B2	Sh3glb1;Sh3glb2	1	-0.05229	0.138396	19.503	19.5337	19.503	19.4395	19.5088	19.5069	19.5337	19.5676
O08997	Copper transport protein ATOX1	Atox1	2	0.375649	0.1388	21.1946	20.7056	20.6886	21.1946	21.3484	20.6276	20.7715	20.7056
P62305	Small nuclear ribonucleoprotein E	Snrpe	5	0.308079	0.138832	23.6209	23.417	23.654	23.5983	23.6209	23.417	22.9916	23.5404
Q9CQ45	Neudesin	Nenf	3	0.399705	0.139174	20.1581	19.7373	20.1581	19.9882	20.1825	20.0559	19.7373	19.3365
P24270	Catalase	Cat	26	-0.189748	0.139622	23.2535	23.5522	23.2961	23.2535	23.2492	23.5638	23.2521	23.5522
P00329	Alcohol dehydrogenase 1	Adh1	4	-0.332617	0.139632	20.85	21.2593	21.1519	20.8499	20.8499	21.5545	21.0359	21.2593
Q8BGI7	Leucine-rich repeat-containing protein 39	Lrrc39	3	0.22448	0.139672	20.1581	19.8515	20.2989	20.1581	20.0559	20.1457	19.8515	19.8423
P97390	Vacuolar protein sorting-associated protein 45	Vps45	8	0.229898	0.139907	20.1825	19.9316	20.1946	20.1825	20.0559	19.9316	20.1079	19.7039
Q9D9V3	Ethylmalonyl-CoA decarboxylase	Echdc1	6	-0.369225	0.139931	21.2066	21.5404	21.2066	20.7553	21.3752	21.5777	21.5404	21.3266
O55102	Biogenesis of lysosome-related organelles complex 1 subunit 1	Bloc1s1	2	0.540229	0.13998	19.6276	18.9516	19.6276	19.805	19.2787	19.4972	18.9516	18.6417
Q9CQA3	Succinate dehydrogenase [ubiquinone] iron-sulfur subunit, mitochondrial	Sdhb	18	-0.0914733	0.140053	27.8682	27.9595	27.9202	27.8682	27.8445	27.9595	27.8973	28.0505
Q8K411	Presequence protease, mitochondrial	Pitrm1	37	0.0581296	0.140062	21.9243	21.8876	21.9951	21.9243	21.9207	21.8538	21.9243	21.8876
Q9QX11	Cytohesin-1	Cyth1	5	0.239869	0.140293	21.5915	21.4726	21.6584	21.5213	21.5915	21.4726	21.4775	21.1015
O35737;Q9Z2X1	Heterogeneous nuclear ribonucleoprotein H	Hnrnpf;Hnrnph1	1	0.130085	0.140497	22.6822	22.5869	22.6649	22.6822	22.7512	22.5869	22.6736	22.4476
P09242	Alkaline phosphatase, tissue-nonspecific isozyme	Alpl	9	-0.331294	0.140677	19.6417	20.0821	20.0691	19.6417	19.5299	20.2066	19.9459	20.0821
Q5NCS9	Mitochondrial dynamics protein MID49	Mief2	3	-0.501245	0.140695	18.185	18.4893	18.2877	18.185	17.4496	18.3452	18.5915	18.4894
Q0VBB0	PRELI domain-containing protein 2	Prelid2	1	1.5909	0.140821	18.7439	16.5326	18.7439	17.9937	18.8666	16.5326	18.5318	15.7671
Q6P5B0	RRP12-like protein	Rrp12	2	1.00974	0.140832	17.3321	16.624	17.5049	17.0847	17.3321	16.624	17.0211	15.2475
Q9CRA5	Golgi phosphoprotein 3	Golph3	3	0.549667	0.140835	17.8606	17.3408	17.9545	17.4252	17.8606	17.3408	17.5432	16.7072
Q9JHW2	Omega-amidase NIT2	Nit2	13	-0.0809994	0.141315	22.654	22.6886	22.6584	22.654	22.5938	22.7935	22.6671	22.6886
Q9QZ73	DCN1-like protein 1	Dcun1d1	4	-0.273939	0.141417	19.3815	19.5933	19.3941	19.0612	19.3815	19.7072	19.5933	19.3581
Q9CR51	V-type proton ATPase subunit G 1	Atp6v1g1	1	0.0775344	0.141558	19.895	19.8484	19.8847	19.895	20.002	19.8847	19.8484	19.816
Q8BKY8	Transcription termination factor 2, mitochondrial	Mterf2	12	-0.17099	0.141571	21.9243	22.1642	21.9243	21.9171	21.9388	22.2155	21.9134	22.1642
Q3ULW8	Protein mono-ADP-ribosyltransferase PARP3	Parp3	6	0.38205	0.141647	19.3452	19.0129	19.3624	19.1679	19.3452	19.0129	19.1922	18.5242
Q921I1;Q9DBD0	Serotransferrin	Ica;Tf	1	0.24349	0.14197	22.239	21.9495	22.1269	22.4349	22.239	21.9024	22.2185	21.9495
Q99LM2	CDK5 regulatory subunit-associated protein 3	Cdk5rap3	5	0.516989	0.142004	20.0559	19.4004	19.7504	20.0559	20.0821	19.4004	19.9214	19.0156
P97352	Protein S100-A13	S100a13	2	0.586454	0.142194	20.9316	20.2989	21.3266	20.9316	20.3752	20.002	20.5731	20.2989
Q8BHC4	Dephospho-CoA kinase domain-containing protein	Dcakd	11	0.0898762	0.142322	22.0691	21.9812	22.1111	22.019	22.0691	21.9812	21.9024	22.0459
P56395	Cytochrome b5	Cyb5a	5	0.200248	0.142713	21.9847	21.7594	21.7348	21.9847	22.0691	21.6409	21.7876	21.7594
Q9CZP7	Hsp90 co-chaperone Cdc37-like 1	Cdc37l1	4	-0.232849	0.142818	19.002	19.1307	18.7731	19.0265	19.002	19.3538	19.1307	19.0156
P62082	40S ribosomal protein S7	Rps7	11	0.12152	0.143151	24.5754	24.4425	24.5754	24.5045	24.5983	24.4425	24.5404	24.3307
Q60930	Voltage-dependent anion-selective channel protein 2	Vdac2	15	0.0448081	0.143178	27.0914	27.0609	27.0711	27.1015	27.0914	27.0711	26.9977	27.0608
Q8VCE1	DnaJ homolog subfamily C member 28	Dnajc28	8	0.177619	0.143298	20.1332	19.9882	20.0691	20.1332	20.2535	19.9882	19.8269	20.1079
Q3URE1	Malonate--CoA ligase ACSF3, mitochondrial	Acsf3	23	-0.128545	0.14333	23.5983	23.6757	23.48	23.5983	23.6209	23.7995	23.6096	23.6757
P70297	Signal transducing adapter molecule 1	Stam	4	0.591221	0.143483	19.3516	18.7764	19.1002	19.7089	19.3516	18.3321	19.2787	18.7764
Q99LE6	ATP-binding cassette sub-family F member 2	Abcf2	7	-0.248713	0.143889	20.5069	20.68	20.2066	20.654	20.5069	20.654	20.7796	20.68
Q8C6I2	Succinate dehydrogenase assembly factor 2, mitochondrial	Sdhaf2	2	-1.72699	0.144349	17.6662	19.0951	15.2858	17.6662	18.0265	17.8965	19.0951	19.1679
O54833	Casein kinase II subunit alpha'	Csnk2a2	3	0.506426	0.14438	18.4854	18.0265	18.8787	17.9714	18.4854	17.7471	18.0426	18.0265
P43883	Perilipin-2	Plin2	9	0.148539	0.144456	20.9601	20.8727	20.9098	21.0951	20.9601	20.9243	20.8727	20.7223
Q99KI0	Aconitate hydratase, mitochondrial	Aco2	46	-0.0916862	0.144482	29.2123	29.3109	29.2354	29.2123	29.1771	29.3766	29.2123	29.3109
Q99NB1	Acetyl-coenzyme A synthetase 2-like, mitochondrial	Acss1	31	-0.174611	0.144485	25.0275	25.1757	25.0275	25.002	25.1174	25.1757	25.0975	25.3975
Q3U2A8	Valine--tRNA ligase, mitochondrial	Vars2	9	-0.198959	0.144501	19.5394	19.7056	19.647	19.4616	19.5394	19.9316	19.6078	19.7056
Q3UW53	Protein Niban 1	Niban1	10	0.219887	0.144513	20.0292	19.7488	20.0292	20.0156	20.1332	19.7488	20.0691	19.7005
Q922V4	Pleiotropic regulator 1	Plrg1	2	0.384902	0.14476	17.3145	16.8606	17.3145	16.977	17.6096	17.1257	16.8606	16.7602
Q8BZF8	Phosphoglucomutase-like protein 5	Pgm5	27	0.187223	0.144891	23.7389	23.5404	23.7695	23.7389	23.6096	23.5404	23.6649	23.3511
O09161	Calsequestrin-2	Casq2	14	-0.0997397	0.144908	26.7645	26.8504	26.7518	26.7771	26.7645	26.7771	26.8504	26.965
Q8BH59	Calcium-binding mitochondrial carrier protein Aralar1	Slc25a12	37	-0.0699031	0.144916	25.7945	25.8881	25.7846	25.7945	25.8093	25.918	25.792	25.8881
Q3TIU4	2',5'-phosphodiesterase 12	Pde12	3	0.314971	0.144982	20.9812	20.4775	21.0292	20.9812	20.6006	20.417	20.7715	20.4775
Q8VE96	Solute carrier family 35 member F6	Slc35f6	2	0.459471	0.145087	20.5356	20.2989	20.3962	20.6453	20.5356	20.3211	20.2989	19.5786
Q9D125	28S ribosomal protein S25, mitochondrial	Mrps25	6	-0.231986	0.145141	20.5356	20.7796	20.2989	20.5356	20.7056	20.8113	20.6453	20.7796
Q9JLM9	Growth factor receptor-bound protein 14	Grb14	4	-0.189103	0.145161	19.0821	19.3408	19.0821	19.0129	19.2832	19.1898	19.4149	19.3408
Q8BTU1	Cilia- and flagella-associated protein 20	Cfap20	2	1.08706	0.145293	17.3408	16.3684	17.624	17.3408	17.3233	15.3005	17.3581	16.3684
Q922R8	Protein disulfide-isomerase A6	Pdia6	11	-0.20708	0.145379	22.7915	22.9672	22.7614	22.7915	22.9933	22.9672	23.2332	22.9672
Q9CYR6	Phosphoacetylglucosamine mutase	Pgm3	9	0.305805	0.145412	19.8454	19.5713	20.0821	19.7257	19.8454	19.5713	19.8128	19.3516
Q9D404	3-oxoacyl-[acyl-carrier-protein] synthase, mitochondrial	Oxsm	10	-0.0728245	0.145529	21.1206	21.2066	21.2125	21.1143	21.1206	21.2707	21.1886	21.2066
A2A5R2;G3X9K3	Brefeldin A-inhibited guanine nucleotide-exchange protein 2	Arfgef1;Arfgef2	4	0.249327	0.145643	20.1457	19.8361	20.0292	20.1457	20.2185	19.8361	20.1206	19.6886
P15864;P43274;P43277	Histone H1.2	H1-2;H1-3;H1-4	4	0.296918	0.145769	27.0401	26.6998	27.0401	26.726	27.2077	26.5448	26.8385	26.6998
Q99LF4	RNA-splicing ligase RtcB homolog	Rtcb	16	0.0808074	0.145866	21.9637	21.8576	21.9637	21.9847	21.9566	21.8307	21.9742	21.8576
P10493	Nidogen-1	Nid1	37	0.0765012	0.145961	25.3612	25.2714	25.4202	25.3612	25.3239	25.2499	25.3545	25.2714
Q9ERI6	Retinol dehydrogenase 14	Rdh14	11	0.0603263	0.146354	21.4375	21.4015	21.4375	21.4375	21.5309	21.391	21.4324	21.4015
Q8BQ46	TAF15 RNA polymerase II, TATA box binding protein (TBP)-associated factor	Taf15	3	0.410397	0.147045	16.7207	16.4608	16.7207	16.6382	17.2326	16.2194	16.68	16.4608
Q9D1H9	Microfibril-associated glycoprotein 4	Mfap4	2	0.301857	0.147244	22.9298	22.5915	22.8595	22.9298	23.019	22.5915	22.9334	22.3778
Q80WJ6	ATP-binding cassette sub-family C member 12	Abcc12	1	0.498576	0.14727	18.6523	18.1104	18.6523	18.8484	18.6311	18.7207	18.1104	17.805
Q9WTK5	Nuclear factor NF-kappa-B p100 subunit	Nfkb2	1	-1.30202	0.147379	18.0899	18.9601	16.2761	18.0899	18.6662	19.1482	18.9601	18.83
Q8CBY1	Protein Smaug homolog 1	Samd4a	2	0.521743	0.148215	17.7731	17.1457	17.7731	18.0795	17.185	17.1457	17.3836	16.9431
P09925	Surfeit locus protein 1	Surf1	6	0.0918115	0.14836	20.9316	20.8651	20.9316	20.9171	21.0426	20.8651	20.8191	20.9316
P07356	Annexin A2	Anxa2	25	0.148354	0.149189	25.5285	25.341	25.5225	25.5285	25.5926	25.341	25.558	25.2996
Q91WV0	Protein Dr1	Dr1	2	0.258469	0.149289	20.1704	19.8238	20.3645	19.9882	20.1703	19.8238	19.816	20.1079
Q9D938	Transmembrane protein 160	Tmem160	3	-0.38144	0.149651	21.1079	21.391	20.7389	21.1079	21.2361	21.6843	21.1519	21.391
Q9R013	Cathepsin F	Ctsf	1	-0.95056	0.150175	17.8727	18.7307	18.528	17.8727	16.7731	18.3836	18.9112	18.7307
O08585	Clathrin light chain A	Clta	4	0.190046	0.150294	21.502	21.3211	21.4726	21.502	21.6096	21.1765	21.5165	21.3211
O35711	Liprin-beta-2	Ppfibp2	2	-0.605703	0.150475	16.7073	17.5356	16.8727	16.7072	16.464	17.6731	17.5356	16.6523
Q60716	Prolyl 4-hydroxylase subunit alpha-2	P4ha2	3	-0.168587	0.150497	18.6628	18.9258	18.606	18.6627	18.8847	18.9258	18.8018	18.9316
Q76LL6	FH1/FH2 domain-containing protein 3	Fhod3	26	-0.217337	0.150665	20.5165	20.8034	20.6453	20.5165	20.3538	20.5451	20.8034	20.8191
Q9JLM8	Serine/threonine-protein kinase DCLK1	Dclk1	1	-0.806076	0.150706	16.9504	17.7796	16.255	16.9504	16.977	17.7796	18.0479	16.7731
Q571F8	Glutaminase liver isoform, mitochondrial	Gls2	1	1.29419	0.150715	18.417	17.3495	18.6627	18.417	18.1053	15.7632	18.1898	17.3495
Q9CR39	WD repeat domain phosphoinositide-interacting protein 3	Wdr45b	3	0.185228	0.151164	19.4596	19.3101	19.4596	19.5432	19.4576	19.1231	19.3101	19.4716
Q8C522	Endonuclease domain-containing 1 protein	Endod1	5	0.189772	0.151422	20.7307	20.4775	20.8191	20.7307	20.6364	20.4775	20.7223	20.417
Q8BH97	Reticulocalbin-3	Rcn3	5	0.347909	0.151505	19.6311	19.4933	19.6311	19.5915	19.9229	19.4933	19.5713	19.0373
P62889	60S ribosomal protein L30	Rpl30	7	0.136381	0.152009	23.391	23.2214	23.3239	23.391	23.4298	23.1363	23.3778	23.2214
Q80UM7	Mannosyl-oligosaccharide glucosidase	Mogs	3	0.258772	0.152022	18.392	18.1507	18.2604	18.3921	18.4375	18.3145	18.1507	17.8484
Q921H9	Cytochrome c oxidase assembly factor 7	Coa7	3	0.073321	0.152054	21.3699	21.2593	21.4066	21.3699	21.3211	21.3592	21.2593	21.2593
Q9CZY3	Ubiquitin-conjugating enzyme E2 variant 1	Ube2v1	1	0.150117	0.152097	20.2066	20.0426	20.0821	20.2066	20.3101	20.1457	20.0426	19.9601
Q8BXA1	Golgi integral membrane protein 4	Golim4	1	0.515427	0.152274	17.6382	17.185	17.1946	17.6382	17.7667	17.3145	17.185	16.5538
Q61553	Fascin	Fscn1	12	0.219851	0.152301	21.3376	21.2361	21.3376	21.3045	21.4324	21.2361	21.2764	20.9024
Q99M51	Cytoplasmic protein NCK1	Nck1	6	0.257762	0.152532	20.1581	20.0292	20.2419	20.0691	20.1581	20.0426	20.0292	19.624
Q9Z1M4	Ribosomal protein S6 kinase beta-2	Rps6kb2	2	0.611925	0.152806	18.3452	17.7987	18.3452	18.5011	17.9316	17.7987	17.0638	18.0795
Q78ZA7	Nucleosome assembly protein 1-like 4	Nap1l4	9	0.0595519	0.153045	21.9707	21.9134	22.0156	21.9243	21.9707	21.9134	21.9459	21.8727
Q9ER72	Cysteine--tRNA ligase, cytoplasmic	Cars1	6	0.198664	0.153525	19.9127	19.778	19.7602	19.9127	20.002	19.778	19.5165	19.7844
Q8BU85	Methionine-R-sulfoxide reductase B3, mitochondrial	Msrb3	4	-0.137047	0.153614	21.2006	21.2989	21.1015	21.2989	21.2006	21.2707	21.4425	21.2989
Q6NZJ6	Eukaryotic translation initiation factor 4 gamma 1	Eif4g1	46	-0.0578702	0.153735	21.5869	21.6671	21.5638	21.6364	21.5869	21.6886	21.6671	21.6051
Q7TT37	Elongator complex protein 1	Elp1	7	0.32369	0.15412	18.8545	18.3495	18.8545	18.7537	18.8965	18.3495	18.8697	18.3145
Q9CR24	Mitochondrial coenzyme A diphosphatase NUDT8	Nudt8	7	0.235341	0.154125	21.1946	20.9024	20.8802	21.1946	21.2302	20.7223	20.9742	20.9024
Q64524	Histone H2B type 2-E	H2bc21	1	0.335829	0.154256	20.5261	20.2066	20.5261	20.4375	20.5356	19.8175	20.4676	20.2066
Q38HM4	E3 ubiquitin-protein ligase TRIM63	Trim63	4	0.125457	0.154266	19.4716	19.3167	19.3581	19.4716	19.5127	19.3167	19.2302	19.419
O08738	Caspase-6	Casp6	1	1.11762	0.15445	18.3962	17.5878	17.6311	18.417	18.3962	17.5878	17.6382	15.8654
Q62234	Myomesin-1	Myom1	109	-0.0932636	0.154602	25.8191	25.9338	25.8191	25.8264	25.7821	25.9338	25.8019	25.9716
Q99J93	Interferon-induced transmembrane protein 2	Ifitm2	2	-0.154332	0.154893	17.7471	17.805	17.7471	17.528	17.786	17.9141	17.805	17.805
Q3UJD6	Ubiquitin carboxyl-terminal hydrolase 19	Usp19	2	-0.494858	0.15524	17.8361	18.4046	17.83	17.8361	17.9658	17.8727	18.8392	18.4046
P47713	Cytosolic phospholipase A2	Pla2g4a	2	-1.90656	0.155252	15.6888	18.5507	15.1026	15.6888	18.3962	18.5508	18.8361	17.5204
Q8VD26	Transmembrane protein 143	Tmem143	10	-0.0908051	0.155296	22.9116	22.9916	22.9207	22.9116	22.8651	23.074	22.9043	22.9916
P62892	60S ribosomal protein L39	Rpl39	2	0.0700817	0.155308	21.2877	21.1765	21.2933	21.1765	21.2877	21.1765	21.2066	21.1642
P11499	Heat shock protein HSP 90-beta	Hsp90ab1	35	-0.127487	0.155358	26.726	26.8385	26.6458	26.726	26.7771	26.8385	26.9539	26.7389
Q8BHY8	Sorting nexin-14	Snx14	1	0.223513	0.155491	18.0795	17.8667	18.0795	18.0373	18.2279	17.7072	18.1002	17.8666
Q9JLR1	Protein transport protein Sec61 subunit alpha isoform 2	Sec61a2	2	-0.418908	0.155504	18.1507	18.5768	18.1507	17.7987	18.606	18.528	18.5768	18.7072
Q3U1J4	DNA damage-binding protein 1	Ddb1	33	0.0958837	0.155523	21.9916	21.9098	22.0724	21.9777	21.9916	21.8423	22.002	21.9098
Q9Z1P6	NADH dehydrogenase [ubiquinone] 1 alpha subcomplex subunit 7	Ndufa7	15	-0.09677	0.155905	26.1984	26.2643	26.217	26.1371	26.1984	26.2643	26.204	26.3745
Q9JLI6	Selenocysteine lyase	Scly	3	-0.386803	0.156151	19.2208	19.4334	18.8666	19.3255	19.2208	19.2809	19.8591	19.4334
P56371;Q91ZR1	Ras-related protein Rab-4A	Rab4a;Rab4b	1	-0.574796	0.156362	18.7106	18.9965	18.9992	18.7106	18.0319	18.9964	18.9882	19.4815
P62196	26S proteasome regulatory subunit 8	Psmc5	20	0.032444	0.156462	22.4196	22.3962	22.4196	22.4093	22.4676	22.3936	22.4093	22.3962
Q9D0L7	Armadillo repeat-containing protein 10	Armc10	6	0.227033	0.157318	20.3211	20.002	19.9742	20.3211	20.3752	20.002	20.0559	19.9316
P42125	Enoyl-CoA delta isomerase 1, mitochondrial	Eci1	18	-0.150275	0.15737	26.673	26.8264	26.7389	26.673	26.604	26.9539	26.6865	26.8264
Q9ESZ8	General transcription factor II-I	Gtf2i	10	-0.22614	0.157487	19.6311	19.9185	19.5897	19.6311	19.7389	19.6505	20.0691	19.9185
P34914	Bifunctional epoxide hydrolase 2	Ephx2	25	-0.168619	0.15754	25.1332	25.3545	25.0732	25.1871	25.1332	25.4234	25.1214	25.3545
Q3UHZ5	Leiomodin-2	Lmod2	18	0.154591	0.157983	21.9707	21.8346	21.9707	22.1143	21.8689	21.8346	21.7348	21.9207
Q3UHJ0	AP2-associated protein kinase 1	Aak1	6	0.210556	0.158215	19.0129	18.8144	18.9516	19.0129	19.0373	18.9826	18.8144	18.5731
Q9D2R8	28S ribosomal protein S33, mitochondrial	Mrps33	2	0.576502	0.158352	19.5011	18.8545	18.7699	19.5011	19.8606	18.6276	18.8545	18.92
Q99J47	Dehydrogenase/reductase SDR family member 7B	Dhrs7b	7	0.107887	0.158424	21.2764	21.1946	21.3101	21.2764	21.265	21.2707	21.1946	21.0625
Q61136	Serine/threonine-protein kinase PRP4 homolog	Prpf4b	4	-0.443459	0.158627	19.0399	19.6311	19.3983	19.0399	18.7537	19.7307	19.6311	19.1605
Q68FM7	Rho guanine nucleotide exchange factor (GEF) 11	Arhgef11	2	-0.336211	0.158701	16.0889	16.6382	16.6523	16.0743	16.0889	16.5296	16.6382	16.6563
Q9D892	Inosine triphosphate pyrophosphatase	Itpa	5	0.0825469	0.158727	21.9098	21.7836	21.7915	21.9098	21.928	21.8346	21.7836	21.7634
P54103	DnaJ homolog subfamily C member 2	Dnajc2	2	0.746031	0.15876	15.7498	15.4383	15.7498	15.726	16.3233	15.4383	15.691	14.4318
Q8C9H6	Striatin-interacting proteins 2	Strip2	7	0.455835	0.159043	19.83	19.6364	19.9601	19.8113	19.83	18.8936	19.7039	19.6364
Q8VEE4	Replication protein A 70 kDa DNA-binding subunit	Rpa1	6	0.200375	0.159086	19.0265	18.7923	19.2113	18.8207	19.0265	18.8727	18.7923	18.7923
Q62426	Cystatin-B	Cstb	3	0.196092	0.159194	20.714	20.5451	20.714	20.6627	20.7553	20.3101	20.6886	20.5451
Q9D8S4	Oligoribonuclease, mitochondrial	Rexo2	4	0.416766	0.159201	21.0493	20.5638	21.0493	21.0951	20.9742	21.0625	20.5638	20.2419
P45952	Medium-chain specific acyl-CoA dehydrogenase, mitochondrial	Acadm	32	-0.12582	0.159398	27.3324	27.4707	27.3494	27.3325	27.2803	27.4707	27.3153	27.5536
P35486	Pyruvate dehydrogenase E1 component subunit alpha, somatic form, mitochondrial	Pdha1	30	-0.0685565	0.159501	28.2847	28.3745	28.2445	28.3239	28.2847	28.3745	28.2891	28.3951
Q8C0T1;Q9Z2G1	Protein fem-1 homolog A-B	Fem1aa;Fem1ab	1	0.993097	0.159521	17.4496	16.6096	17.4496	17.8545	17.0532	15.4807	16.6096	17.2877
A2AAJ9	Obscurin	Obscn	187	0.0975882	0.159749	23.895	23.7695	23.9225	23.895	23.8288	23.7695	23.8764	23.7077
Q6ZQ38	Cullin-associated NEDD8-dissociated protein 1	Cand1	31	0.14299	0.160239	22.2155	22.0325	22.2155	22.1332	22.239	22.0326	22.1946	21.9316
Q9R1T2	SUMO-activating enzyme subunit 1	Sae1	10	0.226726	0.16053	20.1704	19.8832	20.2302	20.1703	20.1703	19.7891	20.2185	19.8832
P27612	Phospholipase A-2-activating protein	Plaa	25	0.0729822	0.16056	21.2821	21.1946	21.3484	21.2821	21.265	21.2933	21.1946	21.1886
Q9CZ69	CKLF-like MARVEL transmembrane domain-containing protein 6	Cmtm6	1	-0.525593	0.160579	17.624	17.9431	16.92	17.624	17.8361	17.9431	17.786	18.2279
P10126;P62631	Elongation factor 1-alpha 1	Eef1a1;Eef1a2	13	0.0558523	0.160682	27.9203	27.9031	27.965	27.9089	27.9202	27.9031	27.9031	27.8203
O54941	SWI/SNF-related matrix-associated actin-dependent regulator of chromatin subfamily E member 1	Smarce1	6	0.355252	0.160806	18.5805	18.1752	18.5805	18.68	18.4293	17.8906	18.5582	18.1752
Q8C570	mRNA export factor	Rae1	1	1.66274	0.160912	19.4893	18.4129	19.6488	19.4894	19.4874	18.4129	19.2208	16.0036
Q8CHH9	Septin-8	Septin8	9	0.13166	0.161005	22.0789	22.0156	22.0292	22.2332	22.0789	21.8913	22.0156	22.0393
Q6P4T2	U5 small nuclear ribonucleoprotein 200 kDa helicase	Snrnp200	29	0.128117	0.161136	20.6886	20.5069	20.6886	20.6886	20.7056	20.5069	20.714	20.4775
Q61702	Inter-alpha-trypsin inhibitor heavy chain H1	Itih1	13	0.348171	0.161989	22.0559	21.7348	21.7755	22.0559	22.0951	21.2821	21.8651	21.7348
Q61879	Myosin-10	Myh10	41	0.296663	0.162063	21.1946	20.8727	21.0559	21.1946	21.3101	20.6276	21.1703	20.8727
Q80ZW2	Protein THEM6	Them6	6	0.377956	0.162133	19.3145	19.0638	19.3145	19.1181	19.4334	18.5127	19.1556	19.0638
Q91VT4	3-oxoacyl-[acyl-carrier-protein] reductase	Cbr4	10	-0.0518608	0.162453	24.0443	24.1095	24.1174	24.0443	24.019	24.1095	24.1015	24.1253
P07309	Transthyretin	Ttr	6	0.19254	0.162517	22.8876	22.6387	22.8269	22.8876	23.0409	22.6386	22.9116	22.6276
Q80U72	Protein scribble homolog	Scrib	1	-1.8381	0.162565	19.3878	20.4972	16.3554	19.6293	19.3879	19.8636	20.5261	20.4972
Q9CQQ7	ATP synthase F(0) complex subunit B1, mitochondrial	Atp5pb	25	-0.0921008	0.163081	26.5536	26.673	26.5536	26.5433	26.604	26.673	26.5653	26.7389
Q3U0V1	Far upstream element-binding protein 2	Khsrp	19	0.17621	0.163117	22.0292	21.8113	22.0088	22.0292	22.0951	21.7307	22.0625	21.8113
P54923	ADP-ribosylhydrolase ARH1	Adprh	10	0.0452843	0.163186	21.1946	21.1519	21.1946	21.2006	21.1457	21.1519	21.1581	21.0951
P10833	Ras-related protein R-Ras	Rras	9	0.0900771	0.163402	22.3538	22.2679	22.4093	22.2792	22.3538	22.1886	22.2678	22.3156
P27601	Guanine nucleotide-binding protein subunit alpha-13	Gna13	8	0.103144	0.163503	20.7307	20.6364	20.7955	20.7307	20.6276	20.6364	20.6627	20.5451
Q62523	Zyxin	Zyx	13	0.38942	0.163524	19.7651	19.6783	19.7651	19.7439	20.1703	19.1407	19.6783	19.692
Q5F2E8	Serine/threonine-protein kinase TAO1	Taok1	3	0.404006	0.163615	18.9686	18.265	18.6417	18.9686	18.9826	18.2372	18.8787	18.265
A6H611	Mitochondrial intermediate peptidase	Mipep	14	0.119033	0.163755	21.68	21.5261	21.6096	21.6843	21.68	21.4324	21.5261	21.6584
P03921	NADH-ubiquinone oxidoreductase chain 5	Mtnd5	12	-0.0849406	0.163849	23.3239	23.391	23.3239	23.2404	23.3645	23.391	23.3376	23.4551
P52196	Thiosulfate sulfurtransferase	Tst	12	-0.0728092	0.163854	22.343	22.4067	22.391	22.2764	22.343	22.4576	22.3645	22.4066
P59016	Vacuolar protein sorting-associated protein 33B	Vps33b	4	0.479931	0.164102	19.6186	19.0638	18.9316	19.6186	19.6186	19.0847	18.5805	19.0638
P13020	Gelsolin	Gsn	27	0.201969	0.164112	22.9495	22.7512	22.9847	22.9134	22.9495	22.7512	22.9477	22.5427
Q99KK2	N-acylneuraminate cytidylyltransferase	Cmas	12	0.277278	0.164202	20.4775	20.1457	20.7056	20.4775	20.3211	20.0691	20.4576	20.1457
P30681	High mobility group protein B2	Hmgb2	6	0.266838	0.164436	20.5823	20.2302	20.3321	20.6364	20.5823	20.0426	20.4775	20.2302
Q3UQ28	Peroxidasin homolog	Pxdn	4	0.176917	0.164771	19.6523	19.5127	19.6523	19.6222	19.8408	19.6714	19.4004	19.5127
P63276	40S ribosomal protein S17	Rps17	9	0.22788	0.164935	22.9637	22.8365	22.9388	22.9742	22.9637	22.4651	22.8913	22.8365
J3QN89	Angio-associated migratory protein	Aamp	3	0.305458	0.165111	19.9316	19.5507	19.5337	19.9316	20.1457	19.5988	19.5451	19.5508
O09159	Lysosomal alpha-mannosidase	Man2b1	5	-0.387237	0.165289	19.3233	19.7089	19.3233	19.0821	19.5069	20.0156	19.7089	19.3495
Q60766	Immunity-related GTPase family M protein 1	Irgm1	8	-0.446735	0.16547	20.7389	20.9316	20.8113	20.6364	20.7389	20.9316	21.6928	20.9024
Q00915	Retinol-binding protein 1	Rbp1	9	0.389573	0.165573	21.9985	21.8269	21.9847	22.1301	21.9985	21.8269	21.9171	21.2006
Q8BZ20	Protein mono-ADP-ribosyltransferase PARP12	Parp12	6	0.319557	0.165606	19.0585	18.624	19.2372	18.6558	19.0585	18.8144	18.624	18.5545
Q9CYL5	Golgi-associated plant pathogenesis-related protein 1	Glipr2	2	0.450975	0.166	18.7828	18.2185	18.547	18.8576	18.7828	18.7373	18.2185	17.8787
Q9CX86	Heterogeneous nuclear ribonucleoprotein A0	Hnrnpa0	7	0.208752	0.166037	22.3129	22.0054	22.3266	22.1673	22.3129	21.8987	22.2764	22.0054
Q80UY1	Carnosine N-methyltransferase	Carnmt1	6	-0.312675	0.166117	20.8802	21.1704	20.8802	21.0493	20.4874	21.2244	20.9601	21.1703
P27641	X-ray repair cross-complementing protein 5	Xrcc5	2	1.07069	0.166131	18.4893	17.786	18.4894	18.724	18.1994	16.1963	18.2185	17.786
Q9JKX6	ADP-sugar pyrophosphatase	Nudt5	5	0.165578	0.166387	20.1457	20.0156	20.265	20.1457	20.0292	20.0156	20.0821	19.8454
Q6ZQ58	La-related protein 1	Larp1	10	0.127924	0.166536	20.0292	19.8621	20.002	20.0292	20.1206	19.8499	19.8621	20.0559
Q9D799	Methionyl-tRNA formyltransferase, mitochondrial	Mtfmt	2	-1.00604	0.167037	15.906	16.2307	14.6268	16.1869	15.906	16.2307	17.2877	16.2194
P70671	Interferon regulatory factor 3	Irf3	1	-1.85214	0.16718	18.4334	19.6204	18.4334	15.5099	19.0426	19.2419	19.68	19.6204
O88532	Zinc finger RNA-binding protein	Zfr	3	0.258239	0.16718	18.8175	18.5049	18.8175	18.7471	18.9141	18.3538	18.8454	18.5049
P35979	60S ribosomal protein L12	Rpl12	7	0.172702	0.168188	23.3239	23.1238	23.3239	23.2821	23.5045	23.1238	23.3511	23.1174
P63085;Q63844	Mitogen-activated protein kinase 1	Mapk1;Mapk3	3	0.142885	0.168204	21.4476	21.2302	21.2933	21.4476	21.4923	21.2302	21.3857	21.1886
Q9WUU7	Cathepsin Z	Ctsz	4	-0.216189	0.168221	20.1206	20.3857	19.9459	20.1332	20.1206	20.4066	20.3857	20.0559
Q8BGZ4	Cell division cycle protein 23 homolog	Cdc23	4	0.324694	0.16831	19.1332	18.6523	19.0532	19.2042	19.1332	18.5842	19.1801	18.6523
Q8VEK0	Cell cycle control protein 50A	Tmem30a	5	0.270816	0.168382	20.7307	20.4576	20.7307	20.7553	20.7056	20.4576	20.7389	20.1825
Q8BIK4	Dedicator of cytokinesis protein 9	Dock9	2	0.526599	0.16854	18.9573	18.5356	18.9573	18.6024	19.3123	17.977	18.5356	18.7796
Q5F285	Transmembrane protein 256	Tmem256	1	-0.15298	0.168783	21.6971	21.8113	21.7915	21.6971	21.6671	21.8113	21.7675	22.0359
P60122	RuvB-like 1	Ruvbl1	16	0.188948	0.169141	20.6971	20.4874	20.7389	20.6971	20.6364	20.4874	20.6971	20.3211
P11404	Fatty acid-binding protein, heart	Fabp3	14	-0.186551	0.169527	30.2535	30.3515	30.2535	30.2535	30.1115	30.5844	30.2422	30.3515
Q8CIF6	SID1 transmembrane family member 2	Sidt2	1	-0.392265	0.169653	17.4576	17.8113	17.4576	17.7923	17.0847	17.6523	18.0479	17.8113
Q8R317;Q9QZM0	Ubiquilin-1	Ubqln1;Ubqln2	3	0.33612	0.169788	20.4375	20.0821	20.2419	20.4375	20.6186	20.0821	20.3962	19.8113
O89084	cAMP-specific 3',5'-cyclic phosphodiesterase 4A	Pde4a	2	-0.824242	0.16983	17.8606	19.1181	17.6096	19.1531	17.8606	19.1825	18.7955	19.1181
O08810	116 kDa U5 small nuclear ribonucleoprotein component	Eftud2	17	0.133902	0.169831	20.343	20.1206	20.3538	20.2764	20.343	20.1079	20.343	20.1206
Q9CZD5	Translation initiation factor IF-3, mitochondrial	Mtif3	2	0.181075	0.16991	18.8906	18.8423	18.8906	19.1028	18.8817	18.8423	18.8727	18.6168
Q8C7H1	Methylmalonic aciduria type A homolog, mitochondrial	Mmaa	16	-0.167105	0.170123	21.5545	21.7553	21.5777	21.5545	21.5545	21.7553	21.5451	21.8876
P01831	Thy-1 membrane glycoprotein	Thy1	2	-0.149673	0.170168	19.4676	19.6096	19.3211	19.6006	19.4676	19.6818	19.6096	19.547
Q6P8X1;Q9D8U8	Sorting nexin-6	Snx5;Snx6	1	0.082716	0.170175	19.2512	19.1777	19.1655	19.2512	19.3299	19.1777	19.1825	19.1382
Q9CQ56	Vesicle transport protein USE1	Use1	4	0.19151	0.170361	19.6347	19.4211	19.8097	19.5768	19.6347	19.4211	19.661	19.3645
A2AJW4	Protein phosphatase 1 regulatory subunit	Ppp1r3d	4	0.291899	0.170566	19.3836	19.0399	19.3836	19.2302	19.5375	19.0399	18.8606	19.3752
Q01815	Voltage-dependent L-type calcium channel subunit alpha-1C	Cacna1c	16	0.0971527	0.170713	20.6453	20.5356	20.714	20.6364	20.6453	20.4972	20.5356	20.6714
Q9QYE6	Golgin subfamily A member 5	Golga5	5	0.211868	0.170778	19.1825	18.8817	19.0238	19.1825	19.2419	18.7828	19.1482	18.8817
Q9WUQ2	Prolactin regulatory element-binding protein	Preb	8	0.249295	0.170839	20.654	20.3211	20.7715	20.5451	20.654	20.3211	20.6714	20.2302
O09164	Extracellular superoxide dismutase [Cu-Zn]	Sod3	3	-0.117769	0.17105	20.1825	20.3101	20.2302	20.1332	20.1825	20.1825	20.4066	20.3101
P21956	Lactadherin	Mfge8	10	-0.365145	0.171755	19.9742	20.5545	19.9742	19.8576	20.3538	20.1079	20.6186	20.5545
Q9DBV4	Matrix remodeling-associated protein 8	Mxra8	2	0.509712	0.171858	17.92	17.6024	17.92	17.734	17.9714	16.7731	17.7207	17.6024
E9Q634	Unconventional myosin-Ie	Myo1e	2	-0.440271	0.171904	16.68	17.2419	16.9316	16.68	16.4608	16.6937	17.4576	17.2419
Q8R1Q9	Ribokinase	Rbks	1	-1.38481	0.171927	16.494	17.714	16.494	14.8485	17.7072	17.714	17.9024	17.5878
Q99L27;Q9DCZ1	GMP reductase 2	Gmpr;Gmpr2	2	0.600588	0.172162	22.7675	22.4849	22.7675	22.6119	22.8932	21.4526	22.4849	22.5333
Q6PHZ2;Q923T9	Calcium/calmodulin-dependent protein kinase type II subunit delta	Camk2d;Camk2g	1	0.292739	0.172212	21.9352	21.6096	21.654	21.9352	21.9352	21.265	21.7715	21.6096
P61967	AP-1 complex subunit sigma-1A	Ap1s1	3	0.518938	0.17225	19.2185	18.6204	18.4933	19.2185	19.3879	18.2185	18.6204	18.7039
Q8BXZ1	Protein disulfide-isomerase TMX3	Tmx3	10	0.24822	0.172279	21.3857	20.9882	21.3857	21.4476	21.1703	20.9388	21.3321	20.9882
Q8BTY8	Sec1 family domain-containing protein 2	Scfd2	4	-0.468313	0.172415	18.8545	19.1357	18.2232	18.8545	19.0532	18.977	19.4232	19.1357
Q80Y17	Lethal(2) giant larvae protein homolog 1	Llgl1	2	1.97048	0.172799	18.4252	17.6937	19.2741	18.4252	18.1002	17.6937	14.3582	17.8361
O35381	Acidic leucine-rich nuclear phosphoprotein 32 family member A	Anp32a	6	0.100073	0.172884	22.8764	22.7533	22.8932	22.8499	22.8764	22.6822	22.8839	22.7533
Q6P8J2	Thialysine N-epsilon-acetyltransferase	Sat2	1	0.693392	0.173168	17.6937	16.8484	17.2787	17.6937	18.1752	16.5597	17.6593	16.8484
Q9DB30	Phosphorylase b kinase gamma catalytic chain, liver/testis isoform	Phkg2	2	0.799567	0.173689	17.2877	16.1888	16.456	17.2877	17.2877	15.5356	16.1888	16.9083
P43025	Tetranectin	Clec3b	1	-0.391254	0.17416	19.3255	19.6417	19.0899	19.3255	19.5413	19.4066	20.0821	19.6417
Q6PCP5	Mitochondrial fission factor	Mff	10	0.0674146	0.174161	21.6409	21.5685	21.6497	21.6409	21.6231	21.502	21.5685	21.6409
P08121	Collagen alpha-1(III) chain	Col3a1	10	0.532212	0.174227	21.5451	21.0691	21.5213	21.5451	21.8269	21.0691	21.6453	20.5823
O70616	AF067061 protein	AF067061	1	-0.654013	0.174802	18.0691	18.9112	17.6382	18.0691	18.265	18.9112	17.9488	19.0743
Q01730	Ras suppressor protein 1	Rsu1	13	0.138959	0.175046	22.7574	22.5846	22.7715	22.7573	22.7161	22.5846	22.7634	22.48
P14211	Calreticulin	Calr	16	-0.206598	0.175283	23.6096	23.6971	23.4676	23.6096	23.7077	23.6971	24.0105	23.6971
O55100	Synaptogyrin-1	Syngr1	2	0.372451	0.175598	21.7307	21.391	21.343	21.7675	21.7307	21.4526	21.391	20.8802
A0A087WR45	Proline-rich basic protein 1	Prob1	14	-0.0552559	0.17565	20.6186	20.6971	20.6627	20.5915	20.6186	20.714	20.6971	20.6276
Q8R081	Heterogeneous nuclear ribonucleoprotein L	Hnrnpl	16	0.128242	0.17567	22.2273	22.1079	22.2273	22.2096	22.2302	21.9531	22.2214	22.1079
Q8R0N6	Hydroxyacid-oxoacid transhydrogenase, mitochondrial	Adhfe1	15	-0.233097	0.175752	23.1222	23.2535	23.1222	22.9725	23.1946	23.1596	23.2535	23.5754
Q9DBG5	Perilipin-3	Plin3	21	0.194487	0.175823	23.0122	22.85	23.0691	23.0122	22.9043	22.8499	22.5938	22.9584
P62806	Histone H4	H4f16	13	0.155404	0.176322	30.341	30.1115	30.4234	30.2193	30.341	30.1115	30.3196	30.0864
Q99K28	ADP-ribosylation factor GTPase-activating protein 2	Arfgap2	14	0.187071	0.176325	20.4067	20.1457	20.4066	20.3321	20.4775	20.1457	20.4273	20.0821
Q3UPL0	Protein transport protein Sec31A	Sec31a	28	0.152225	0.176661	21.68	21.502	21.68	21.5777	21.7098	21.502	21.6497	21.3592
O08547	Vesicle-trafficking protein SEC22b	Sec22b	11	0.146123	0.176764	22.0625	21.9134	22.0625	22.0258	22.0854	21.9134	22.0625	21.7594
P23475	X-ray repair cross-complementing protein 6	Xrcc6	4	0.608945	0.17691	18.734	18.1357	18.734	18.7439	18.3101	17.3321	18.4933	18.1357
P56135	ATP synthase subunit f, mitochondrial	Atp5mf	6	-0.0617154	0.177206	29.158	29.2193	29.158	29.217	29.1507	29.2193	29.1937	29.2979
B2RUS7	ATP-binding cassette, sub-family C (CFTR/MRP), member 8	Abcc8	5	0.244696	0.177596	19.7106	19.3233	19.5731	19.7106	19.805	19.3233	19.719	19.3123
Q8VBV7	COP9 signalosome complex subunit 8	Cops8	5	0.0802949	0.177604	21.3045	21.2535	21.2361	21.3592	21.3045	21.1519	21.2535	21.2535
Q8BSF4	Phosphatidylserine decarboxylase proenzyme, mitochondrial	Pisd	3	0.718711	0.178035	19.8515	19.2208	19.575	19.8515	19.8832	19.6954	19.2208	18.2372
P58252	Elongation factor 2	Eef2	44	-0.0775744	0.178052	24.632	24.7077	24.5696	24.632	24.6918	24.7077	24.7645	24.654
Q9CQ86	Migration and invasion enhancer 1	Mien1	2	-0.638868	0.178105	19.92	20.5261	19.92	19.2535	20.4775	20.8113	20.2302	20.5261
P68372;P99024;Q7TMM9;Q9CWF2	Tubulin beta-4B chain	Tubb2a;Tubb2b;Tubb4b;Tubb5	2	0.122365	0.178605	24.5463	24.48	24.6971	24.5463	24.4738	24.48	24.4923	24.3778
Q9QZB9	Dynactin subunit 5	Dctn5	1	0.998175	0.178613	18.724	17.3056	18.4736	19.0951	18.724	17.3056	17.0638	18.9287
P62830	60S ribosomal protein L23	Rpl23	6	0.169264	0.178711	23.7389	23.5638	23.7389	23.7389	23.8385	23.5638	23.7895	23.4551
P70265;P70266	6-phosphofructo-2-kinase/fructose-2,6-bisphosphatase 2	Pfkfb1;Pfkfb2	1	-0.356621	0.178756	21.4526	21.68	21.265	21.5213	21.4526	22.1612	21.4676	21.68
O35381;Q9EST5	Acidic leucine-rich nuclear phosphoprotein 32 family member A	Anp32a;Anp32b	3	0.17902	0.178761	23.1332	22.9459	23.1688	23.1332	23.1206	22.7816	23.1581	22.9459
Q8BX80	Cytosolic endo-beta-N-acetylglucosaminidase	Engase	5	-0.362775	0.178786	18.6024	18.8238	18.6024	18.6276	18.4775	19.3516	18.8238	18.6204
P07310;Q04447	Creatine kinase M-type	Ckb;Ckm	3	-0.144824	0.178842	25.1565	25.3031	25.1015	25.2058	25.1565	25.4425	25.1527	25.3031
O35927;Q68FH0	Catenin delta-2	Ctnnd2;Pkp4	1	0.935072	0.179242	17.5582	16.387	17.8175	16.2805	17.5582	16.786	16.387	15.6781
D3Z3N4	Heterogeneous nuclear ribonucleoprotein H3	Hnrnph3	8	0.139586	0.179508	20.8727	20.6453	20.8876	20.7389	20.8727	20.6453	20.8346	20.6006
Q61838	Pregnancy zone protein	Pzp	34	-0.373691	0.179556	22.7816	23.1886	22.937	22.6431	22.7816	23.1886	23.5165	22.7776
P12382	ATP-dependent 6-phosphofructokinase, liver type	Pfkl	21	-0.108752	0.179767	22.538	22.6562	22.4996	22.538	22.6518	22.7634	22.6562	22.5961
Q9Z2Z6	Mitochondrial carnitine/acylcarnitine carrier protein	Slc25a20	20	-0.163327	0.179922	25.1681	25.341	25.1984	25.1681	25.1095	25.48	25.1449	25.341
Q923B6	Metalloreductase STEAP4	Steap4	9	-0.0879345	0.180057	20.9171	20.9882	20.9171	20.895	20.9171	21.0951	20.9098	20.9882
Q3TDN2	FAS-associated factor 2	Faf2	7	0.156787	0.180159	20.2535	20.0951	20.2535	20.1079	20.417	20.1703	20.0426	20.0951
P51885	Lumican	Lum	12	0.377051	0.180273	24.3307	23.9495	24.2535	24.3307	24.5869	23.9495	24.4041	23.6865
Q6PFD9	Nuclear pore complex protein Nup98-Nup96	Nup98	5	0.226377	0.180282	19.3145	19.0664	19.3815	19.2535	19.3145	19.0664	19.3343	18.8697
Q501J6;Q61656;Q62095;Q62167	Probable ATP-dependent RNA helicase DDX17	Ddx17;Ddx3x;Ddx3y;Ddx5	3	0.297071	0.180328	23.8385	23.6757	23.8191	23.895	23.8385	23.6757	23.1961	23.7895
Q99LY9	NADH dehydrogenase [ubiquinone] iron-sulfur protein 5	Ndufs5	7	-0.0674095	0.180344	25.2243	25.2996	25.2785	25.1984	25.2244	25.2996	25.2426	25.3612
P62835;Q99JI6	Ras-related protein Rap-1A	Rap1a;Rap1b	7	0.109244	0.180602	24.2021	24.0275	24.2244	24.1253	24.2021	24.1946	24.0275	24.002
P62754	40S ribosomal protein S6	Rps6	9	0.192691	0.180688	24.3712	24.1253	24.3511	24.3712	24.48	24.0691	24.4298	24.1253
Q6PIE5;Q9Z1W8	Sodium/potassium-transporting ATPase subunit alpha-2	Atp12a;Atp1a2	1	0.351737	0.180795	22.8423	22.3156	22.2332	22.8745	22.8423	22.1856	22.3156	22.3936
P61982;P68510	14-3-3 protein gamma	Ywhag;Ywhah	2	0.314842	0.181077	23.3239	22.976	23.6649	23.3239	23.1253	23.2821	22.976	22.9116
Q8BVL3	Sorting nexin-17	Snx17	2	0.383971	0.181094	18.8606	18.7207	18.7439	18.8606	19.1206	18.7207	18.7471	18.1053
Q9DAW9	Calponin-3	Cnn3	4	0.16717	0.181472	20.8346	20.6971	20.7553	20.8346	21.0756	20.6971	20.7955	20.6714
Q9DBU0	Transmembrane 9 superfamily member 1	Tm9sf1	1	1.10889	0.181986	17.9316	16.8727	18.724	17.9316	16.9992	15.9122	17.5432	16.8727
Q9R0P6	Signal peptidase complex catalytic subunit SEC11A	Sec11a	6	0.239298	0.182101	22.1673	22.0756	22.2849	22.1174	22.1673	21.6714	22.1047	22.0756
Q9JJE7	Fatty acid desaturase 3	Fads3	2	0.538966	0.182272	19.0265	18.265	19.1825	19.0265	18.624	18.963	17.9882	18.265
Q8C8R3;Q8JZQ2	Ankyrin-2	Afg3l2;Ank2	1	0.185645	0.182663	22.1143	21.9316	22.3129	22.1143	22.0224	22.1111	21.8499	21.9316
O88531	Palmitoyl-protein thioesterase 1	Ppt1	6	-0.15706	0.182969	21.265	21.4015	21.265	21.3699	21.1395	21.4015	21.5451	21.2989
Q6YI28	EP1	Lypd8l	2	-2.19413	0.183014	16.4064	20.0951	16.0439	16.4064	17.5127	16.2677	20.1825	20.0951
O70309	Integrin beta-5	Itgb5	3	1.60846	0.183191	18.9798	18.185	19.0453	18.9798	18.7406	18.185	18.4293	15.326
Q3TW96;Q6P549	UDP-N-acetylhexosamine pyrophosphorylase-like protein 1	Inppl1;Uap1l1	1	0.191593	0.183197	19.9742	19.6662	19.9742	19.9882	19.8002	19.6662	19.9301	19.5915
Q61033	Lamina-associated polypeptide 2, isoforms alpha/zeta	Tmpo	13	0.175622	0.183382	22.5846	22.3457	22.6606	22.5309	22.5846	22.2849	22.6186	22.3457
P25976	Nucleolar transcription factor 1	Ubtf	8	0.393349	0.183497	20.1332	19.6766	20.4066	20.1079	20.1332	19.5261	20.265	19.6766
O35114	Lysosome membrane protein 2	Scarb2	12	-0.0835183	0.183521	20.8876	20.9672	20.8876	20.9316	20.7876	20.9672	20.9951	20.895
P58774	Tropomyosin beta chain	Tpm2	7	-0.264486	0.183533	22.1795	22.5615	22.1795	22.0426	22.4701	22.2877	22.5615	22.6364
Q9JIG7	Coiled-coil domain-containing protein 22	Ccdc22	9	0.112069	0.183739	20.002	19.9185	19.9601	20.0156	20.002	19.9185	19.9742	19.7488
Q5SRX1	TOM1-like protein 2	Tom1l2	9	-0.162498	0.183872	20.9672	21.1015	20.7471	20.9672	21.0821	21.1332	21.1015	21.0493
P61226;Q8BU31	Ras-related protein Rap-2b	Rap2b;Rap2c	2	0.322599	0.184296	21.0426	20.6364	21.0493	20.9672	21.0426	21.0691	20.6364	20.3857
Q9JHU4	Cytoplasmic dynein 1 heavy chain 1	Dync1h1	204	0.0635955	0.184398	23.2961	23.2199	23.2961	23.3101	23.2477	23.2199	23.2821	23.1612
P08074	Carbonyl reductase [NADPH] 2	Cbr2	9	-0.356483	0.184465	21.7389	22.0559	21.2989	21.7389	22.0625	22.0983	22.0559	22.0156
Q8CDG3	Deubiquitinating protein VCPIP1	Vcpip1	2	0.714564	0.184485	16.0743	15.2058	16.5893	16.0743	15.2475	15.2058	14.9106	15.6509
Q9JLT4	Thioredoxin reductase 2, mitochondrial	Txnrd2	13	-0.129041	0.184501	22.2125	22.2905	22.2125	22.2764	22.1269	22.4676	22.2448	22.2905
Q99MD6	Thioredoxin reductase 3	Txnrd3	2	0.506881	0.185106	18.0319	17.624	18.0319	18.1457	17.5657	16.8847	17.624	17.714
Q8BHG2	CXXC motif containing zinc binding protein	Czib	4	0.153824	0.185471	20.7389	20.5451	20.5731	20.7389	20.8034	20.4375	20.5451	20.6714
Q64514	Tripeptidyl-peptidase 2	Tpp2	21	0.0727717	0.185696	20.8802	20.8191	20.8802	20.9024	20.8423	20.8191	20.7223	20.8651
P70271	PDZ and LIM domain protein 4	Pdlim4	4	-0.200313	0.185903	19.7699	19.9112	19.7699	19.5878	19.8891	20.1206	19.9112	19.816
P80318	T-complex protein 1 subunit gamma	Cct3	28	-0.0870139	0.186464	23.0393	23.1504	22.9951	23.0393	23.0918	23.1503	23.1976	23.0393
P21460	Cystatin-C	Cst3	4	-0.139355	0.186496	21.6409	21.8538	21.5961	21.6409	21.8152	21.714	21.9024	21.8538
O54781	SRSF protein kinase 2	Srpk2	3	0.595662	0.18668	18.8846	18.3794	18.8847	18.6558	19.6662	18.8847	18.1556	18.3794
Q08091	Calponin-1	Cnn1	6	-0.686991	0.187032	19.4334	20.3752	19.4334	19.1079	20.2302	19.7602	20.3752	20.6971
Q91YJ5	Translation initiation factor IF-2, mitochondrial	Mtif2	11	-0.138524	0.187072	20.895	20.953	20.7223	20.9459	20.895	21.1015	20.9243	20.9531
P62267	40S ribosomal protein S23	Rps23	5	0.114732	0.1873	23.6865	23.6096	23.6865	23.6649	23.7796	23.6096	23.6971	23.48
Q8VD04	GRIP1-associated protein 1	Gripap1	7	-0.293676	0.187366	17.5049	17.8238	17.5049	17.8484	17.4087	17.8238	18.1257	17.6937
Q9WUZ9	Ectonucleoside triphosphate diphosphohydrolase 5	Entpd5	3	1.13707	0.187413	17.7471	17.4334	17.5582	18.5878	17.7471	15.5437	17.5049	17.4334
Q78J03	Methionine-R-sulfoxide reductase B2, mitochondrial	Msrb2	6	-0.182368	0.187611	23.1688	23.4041	23.0658	23.1688	23.2434	23.4041	23.141	23.48
O70325	Phospholipid hydroperoxide glutathione peroxidase	Gpx4	7	-0.0765012	0.187974	22.1946	22.2448	22.1976	22.1856	22.1946	22.3619	22.2006	22.2448
Q6ZQB6	Inositol hexakisphosphate and diphosphoinositol-pentakisphosphate kinase 2	Ppip5k2	18	-0.132357	0.188024	19.68	19.8423	19.68	19.6168	19.6937	19.8423	19.64	19.9054
A2AR02	Peptidyl-prolyl cis-trans isomerase G	Ppig	2	0.164245	0.188186	19.528	19.4456	19.528	19.719	19.4293	19.4456	19.2764	19.4616
Q8BTS3	Guanylate-binding protein 9	Gbp9	10	0.151257	0.188433	19.5011	19.3365	19.5638	19.5011	19.4775	19.3365	19.5337	19.2185
Q9CQ79	Thioredoxin domain-containing protein 9	Txndc9	1	0.472317	0.188703	19.2302	18.9083	19.2302	19.3941	19.0184	18.9083	19.1181	18.1994
Q8VDP4	Cell cycle and apoptosis regulator protein 2	Ccar2	6	0.216169	0.188864	20.7553	20.5261	20.9024	20.4676	20.7553	20.3962	20.5261	20.5545
Q91YJ2	Sorting nexin-4	Snx4	4	0.356141	0.189562	19.4835	19.1581	19.5185	19.2787	19.4835	19.3879	18.6662	19.1581
Q91W50	Cold shock domain-containing protein E1	Csde1	15	-0.0491816	0.189703	20.6186	20.6628	20.6186	20.654	20.6096	20.6627	20.7307	20.6364
P07310	Creatine kinase M-type	Ckm	33	-0.151367	0.189757	29.1628	29.3848	29.1189	29.2077	29.1628	29.3848	29.1312	29.4274
O89051	Integral membrane protein 2B	Itm2b	4	-0.482541	0.189807	19.1482	19.5489	18.6096	19.4835	19.1482	19.2764	19.8636	19.5489
A0A0B4J1H7	Immunoglobulin kappa variable 1-135 (Fragment)	Igkv1-135	3	0.507808	0.189809	19.1155	18.3836	19.3343	18.734	19.1155	19.0821	18.1946	18.3836
Q80SW1	S-adenosylhomocysteine hydrolase-like protein 1	Ahcyl1	5	0.236446	0.18981	20.4273	20.2764	20.4476	20.3752	20.4273	20.2764	20.3752	19.8891
O08532	Voltage-dependent calcium channel subunit alpha-2/delta-1	Cacna2d1	27	0.184773	0.18995	22.5731	22.4067	22.5189	22.5869	22.5731	22.1612	22.4066	22.5568
P70372	ELAV-like protein 1	Elavl1	11	0.0862007	0.18995	22.1079	21.9495	22.1079	21.9882	22.1174	21.9495	22.0559	21.9495
Q9DCL4	12S rRNA N4-methylcytidine methyltransferase	Mettl15	2	-0.435907	0.190054	16.2251	16.4624	16.3937	16.0254	16.2251	16.4624	16.3339	17.1556
O54824	Pro-interleukin-16	Il16	4	0.459407	0.190303	18.1407	17.68	18.1407	17.6382	18.1898	17.68	17.8361	17.0743
Q62318	Transcription intermediary factor 1-beta	Trim28	15	0.212811	0.190373	21.1519	20.8876	21.0951	21.1519	21.2593	20.8876	21.2006	20.7796
Q8VDZ4	Palmitoyltransferase ZDHHC5	Zdhhc5	1	1.65957	0.190852	17.9431	16.7117	18.2232	17.9431	17.6523	16.7117	14.2981	17.83
Q61469	Phospholipid phosphatase 1	Plpp1	1	0.222696	0.190932	17.5507	17.4576	17.4815	17.9258	17.5508	17.3667	17.4576	17.4656
P35585	AP-1 complex subunit mu-1	Ap1m1	12	0.141337	0.191157	21.6671	21.4972	21.6671	21.5915	21.7553	21.4972	21.6757	21.417
Q80Y81	Zinc phosphodiesterase ELAC protein 2	Elac2	2	-0.133739	0.191161	19.3145	19.5049	19.3145	19.3233	19.2673	19.5049	19.5318	19.2696
P61022	Calcineurin B homologous protein 1	Chp1	4	0.199203	0.191224	20.4775	20.3321	20.3962	20.6186	20.4775	20.4676	20.3321	20.0951
Q9CR16	Peptidyl-prolyl cis-trans isomerase D	Ppid	13	-0.145714	0.191346	22.1488	22.3101	22.1206	22.1673	22.1488	22.3101	22.44	22.1238
Q9QZZ6	Dermatopontin	Dpt	2	0.51416	0.191386	22.2477	21.5685	22.0625	22.2477	22.3699	21.5685	22.3156	21.2535
Q8BTS4	Nuclear pore complex protein Nup54	Nup54	4	0.234104	0.191486	19.7455	19.3645	19.7455	19.7683	19.714	19.3559	19.805	19.3645
Q8VDW0;Q9Z1N5	ATP-dependent RNA helicase DDX39A	Ddx39a;Ddx39b	10	0.148426	0.191551	23.2679	23.0918	23.3511	23.2678	23.2678	23.0918	23.3239	23.0258
Q9D1C8	Vacuolar protein sorting-associated protein 28 homolog	Vps28	6	0.124336	0.191597	20.7876	20.6276	20.7955	20.7056	20.7876	20.5165	20.7715	20.6276
P83887	Tubulin gamma-1 chain	Tubg1	4	-0.28609	0.191765	18.8545	18.9826	18.8545	18.6662	19.002	19.4354	18.963	18.9826
Q8CIE6	Coatomer subunit alpha	Copa	34	0.128671	0.192168	22.1269	21.928	22.1519	22.0691	22.1269	21.928	22.1426	21.8913
Q8BJY1	26S proteasome non-ATPase regulatory subunit 5	Psmd5	10	0.143867	0.192261	20.8802	20.8034	20.8802	20.8346	20.9601	20.8034	20.8576	20.5823
A2A8Z1	Oxysterol-binding protein-related protein 9	Osbpl9	3	-0.0794589	0.192485	20.8113	20.8876	20.8113	20.7471	20.9098	20.8802	20.9388	20.8876
Q60790	Ras GTPase-activating protein 3	Rasa3	1	0.290806	0.192574	19.2489	18.9287	19.2489	19.2185	19.3012	19.3012	18.9287	18.6662
Q64737	Trifunctional purine biosynthetic protein adenosine-3	Gart	18	-0.04636	0.192904	22.0493	22.1047	22.1206	22.0459	22.0493	22.1047	22.1519	22.0983
Q5H8C4	Intermembrane lipid transfer protein VPS13A	Vps13a	15	-0.118031	0.193854	19.7257	19.8346	19.6024	19.7257	19.8361	19.901	19.8346	19.7828
P49813;Q9JLH8	Tropomodulin-1	Tmod1;Tmod4	1	-0.106539	0.193886	22.0821	22.1488	22.0292	22.1612	22.0821	22.1488	22.1332	22.3101
Q9WV85	Nucleoside diphosphate kinase 3	Nme3	7	0.189451	0.194113	21.6929	21.5069	21.6928	21.8423	21.6006	21.7013	21.5069	21.3592
O35892	Nuclear autoantigen Sp-100	Sp100	5	0.531482	0.194148	19.5694	19.2137	19.6186	19.4129	19.5694	19.2137	19.4476	18.3452
Q06335	Amyloid beta precursor like protein 2	Aplp2	2	-1.13538	0.19443	17.4415	18.4775	16.1236	18.5842	17.4415	18.4775	18.2604	18.8175
P13707;Q3ULJ0	Glycerol-3-phosphate dehydrogenase [NAD(+)], cytoplasmic	Gpd1;Gpd1l	1	0.182203	0.194785	21.9098	21.7796	21.9098	21.7796	21.9207	21.8113	21.4726	21.7796
Q9CR68	Cytochrome b-c1 complex subunit Rieske, mitochondrial	Uqcrfs1	22	-0.106307	0.194792	27.5682	27.7453	27.5389	27.632	27.5682	27.7518	27.5609	27.7453
Q9JMC3	DnaJ homolog subfamily A member 4	Dnaja4	16	0.0724449	0.194901	21.9207	21.8191	21.8385	21.9207	21.9601	21.8913	21.8191	21.7915
P12804	Fibroleukin	Fgl2	2	0.416081	0.194914	18.9545	18.2279	18.606	18.9545	19.0292	18.1994	18.9141	18.2279
P08071	Lactotransferrin	Ltf	1	0.658244	0.195212	17.4736	16.5387	16.7731	17.4736	17.714	16.1869	17.2604	16.5387
P07901;P11499	Heat shock protein HSP 90-alpha	Hsp90aa1;Hsp90ab1	15	-0.105983	0.195259	26.2317	26.3153	26.1391	26.2317	26.2499	26.3153	26.4138	26.2096
Q9D920	BLOC-1-related complex subunit 5	Borcs5	1	1.28465	0.195309	17.2787	16.2417	16.1257	17.2787	18.0265	16.68	14.6551	16.2417
Q5U5M8	Biogenesis of lysosome-related organelles complex 1 subunit 3	Bloc1s3	2	0.740547	0.195761	17.68	16.7731	17.68	17.9937	17.4972	17.8545	16.7731	16.3216
Q9ESX5	H/ACA ribonucleoprotein complex subunit DKC1	Dkc1	5	0.418716	0.195802	20.4576	20.1946	20.4576	20.5545	20.1206	19.4874	20.1946	20.1946
P97379	Ras GTPase-activating protein-binding protein 2	G3bp2	7	0.14992	0.195822	20.0821	19.895	20.0951	20.0821	20.0821	19.7939	20.1206	19.895
Q9D287	Pre-mRNA-splicing factor SPF27	Bcas2	3	0.494345	0.195998	19.0156	18.3365	19.3899	18.6523	19.0156	18.2419	18.9964	18.3365
Q5ND29	Rab-interacting lysosomal protein	Rilp	10	0.272057	0.196089	21.1519	20.9459	21.2535	21.1519	21.1519	20.6006	21.1946	20.9459
Q8CEI1	BolA-like protein 3	Bola3	4	-0.116434	0.196146	21.3645	21.4825	21.2361	21.3645	21.3962	21.5261	21.3376	21.4825
O08638;Q61879;Q8VDD5	Myosin-11	Myh10;Myh11;Myh9	2	-0.203485	0.196235	20.68	21.002	20.5731	20.68	20.9672	20.8269	21.002	21.002
Q99KC8	von Willebrand factor A domain-containing protein 5A	Vwa5a	18	0.170504	0.196243	22.5592	22.3017	22.5592	22.4849	22.5823	22.3017	22.58	22.2332
O88735;Q9QXS1	Ensconsin	Map7;Plec	1	0.127117	0.196359	18.4656	18.3233	18.4656	18.4696	18.3101	18.1655	18.3233	18.3752
Q61555	Fibrillin-2	Fbn2	1	0.734049	0.196397	18.2372	17.0211	17.4656	18.2372	18.5731	17.0211	18.0426	17.0102
P0C0A3	Charged multivesicular body protein 6	Chmp6	2	-0.540059	0.196781	18.4087	19.3386	18.4087	18.8847	18.3012	18.4736	19.4025	19.3387
Q9WU56	Pseudouridylate synthase 1 homolog	Pus1	5	0.144515	0.196798	19.1679	19.1282	19.1679	19.2535	19.1457	19.1282	19.1357	18.8697
Q9JII5	DAZ-associated protein 1	Dazap1	3	0.1468	0.196842	21.8764	21.6231	21.8764	21.6096	21.8839	21.6231	21.7013	21.6051
P02301;P68433;P84228;P84244	Histone H3.3C	H3-3b;H3-5;H3c11;H3c15	7	0.149869	0.196935	29.1015	28.8445	29.1015	28.9896	29.1435	28.8445	29.099	28.8415
Q9CQ54	NADH dehydrogenase [ubiquinone] 1 subunit C2	Ndufc2	9	-0.127157	0.19736	25.8409	25.9271	25.7415	25.8409	25.918	25.9271	25.8694	26.0854
Q91Z53	Glyoxylate reductase/hydroxypyruvate reductase	Grhpr	10	0.13474	0.197443	23.9495	23.7492	23.9134	23.9933	23.9495	23.9847	23.7182	23.7492
P42567	Epidermal growth factor receptor substrate 15	Eps15	9	0.233003	0.197468	19.9742	19.7022	19.9882	19.8787	19.9742	19.7022	19.9742	19.4656
Q0KL01	UBX domain-containing protein 2B	Ubxn2b	2	1.85907	0.197528	20.6714	19.8253	20.8191	20.6714	20.0691	19.8253	16.2965	19.8606
Q59J78	NADH dehydrogenase [ubiquinone] 1 alpha subcomplex assembly factor 2	Ndufaf2	9	-0.103844	0.197724	21.7876	21.8191	21.7876	21.7553	21.7955	22.0156	21.8191	21.8152
Q9D7M1	Glucose-induced degradation protein 8 homolog	Gid8	3	0.24136	0.197787	19.3688	19.0372	19.1581	19.3688	19.5204	19.0373	19.3343	18.9516
Q6PDM2	Serine/arginine-rich splicing factor 1	Srsf1	14	0.160355	0.198023	22.6164	22.3672	22.6164	22.5404	22.654	22.3239	22.6386	22.3672
Q61081	Hsp90 co-chaperone Cdc37	Cdc37	15	-0.0897655	0.198049	22.3645	22.3884	22.2535	22.3645	22.3831	22.3752	22.5069	22.3884
O88653	Ragulator complex protein LAMTOR3	Lamtor3	1	0.166272	0.198167	21.6096	21.4676	21.6096	21.6497	21.5451	21.5961	21.4676	21.2419
Q8R1I1	Cytochrome b-c1 complex subunit 9	Uqcr10	5	-0.0785503	0.198226	27.2353	27.3324	27.2262	27.2354	27.3578	27.3325	27.3153	27.4073
Q99J45	Nuclear receptor-binding protein	Nrbp1	3	0.408024	0.198643	19.3899	18.9083	19.3899	18.8936	19.7764	18.9083	19.0821	18.8454
Q6PER3	Microtubule-associated protein RP/EB family member 3	Mapre3	4	-0.142452	0.198807	20.3645	20.417	20.1581	20.3645	20.3645	20.5545	20.417	20.343
Q9DBH5	Vesicular integral-membrane protein VIP36	Lman2	9	0.0940526	0.199105	22.4726	22.4067	22.4349	22.5093	22.4726	22.4066	22.4601	22.2678
Q9CWP6	Motile sperm domain-containing protein 2	Mospd2	2	0.750499	0.199395	18.3012	17.786	18.8936	18.3012	17.7406	17.786	18.0373	16.8606
Q8R191	Synaptogyrin-3	Syngr3	2	-0.460021	0.199399	19.2741	19.5223	18.5582	19.2741	19.4656	19.5223	19.7764	19.3794
P42925	Peroxisomal membrane protein 2	Pxmp2	6	-0.147114	0.199621	22.2006	22.3725	22.2933	22.2006	22.1765	22.3725	22.2155	22.5237
Q8K0L0	Ankyrin repeat and SOCS box protein 2	Asb2	10	-0.168559	0.199805	19.8787	19.9742	19.6971	19.9054	19.8787	20.1581	19.8545	19.9742
Q9EPU4	Cleavage and polyadenylation specificity factor subunit 1	Cpsf1	6	0.202226	0.200663	18.9112	18.6453	18.9964	18.9112	18.9083	18.5731	18.9909	18.6453
Q9CQW9	Interferon-induced transmembrane protein 3	Ifitm3	2	-0.556454	0.200912	18.4815	19.0346	17.9141	18.4815	19.0346	19.3211	19.0346	18.7439
Q8C2Q3	RNA-binding protein 14	Rbm14	12	0.116735	0.201025	20.8802	20.7634	20.8802	20.8499	21.0156	20.7223	20.9098	20.7634
Q9CWL8	Beta-catenin-like protein 1	Ctnnbl1	4	0.156255	0.201162	19.6435	19.5451	19.6435	19.624	19.654	19.2855	19.6222	19.5451
P62880	Guanine nucleotide-binding protein G(I)/G(S)/G(T) subunit beta-2	Gnb2	3	0.471349	0.201267	22.1886	21.8307	21.9388	22.1886	22.239	21.0756	22.0459	21.8307
Q9DBR1	5'-3' exoribonuclease 2	Xrn2	2	-0.34582	0.20132	18.8667	19.3602	18.7667	19.4756	18.8666	19.3145	19.4716	19.3603
Q8C165	N-fatty-acyl-amino acid synthase/hydrolase PM20D1	Pm20d1	3	0.378379	0.201704	18.5805	17.977	18.805	18.5805	18.2279	17.977	17.977	18.5242
P52432	DNA-directed RNA polymerases I and III subunit RPAC1	Polr1c	1	0.535829	0.201975	16.6096	16.1892	17.0211	16.6068	16.6096	15.6607	16.1892	16.7801
Q9CXJ1	Probable glutamate--tRNA ligase, mitochondrial	Ears2	8	0.116318	0.202083	20.8191	20.6714	20.8191	20.714	20.8651	20.7955	20.5823	20.6714
Q99J99	3-mercaptopyruvate sulfurtransferase	Mpst	13	0.122953	0.202345	24.4362	24.3307	24.5812	24.4105	24.4362	24.2607	24.3307	24.4676
Q9Z1M8	Protein Red	Ik	4	0.316319	0.20236	19.1432	18.6382	19.1507	18.9287	19.1432	18.4972	19.1382	18.6382
Q14CH7	Alanine--tRNA ligase, mitochondrial	Aars2	10	0.14949	0.202456	19.4696	19.4211	19.5988	19.4696	19.4273	19.4211	19.1825	19.4435
Q3U0M1	Trafficking protein particle complex subunit 9	Trappc9	4	-0.391402	0.202616	17.9373	18.4933	18.606	17.8606	17.9373	18.3709	18.714	18.4933
P38060	Hydroxymethylglutaryl-CoA lyase, mitochondrial	Hmgcl	9	0.065944	0.202947	22.6929	22.6276	22.6928	22.7796	22.6409	22.6693	22.6276	22.6186
P57780;Q9JI91	Alpha-actinin-4	Actn2;Actn4	2	0.238483	0.203014	25.3273	25.1719	25.6838	25.3273	25.275	25.3545	25.0443	25.1719
Q3TC33	Coiled-coil domain-containing protein 127	Ccdc127	6	-0.116445	0.203082	20.5731	20.654	20.6714	20.5731	20.4273	20.7307	20.654	20.6364
Q9JLQ2	ARF GTPase-activating protein GIT2	Git2	1	0.244151	0.203346	18.7731	18.6593	18.7731	18.8906	18.6453	18.68	18.6593	18.2372
Q64726	Zinc-alpha-2-glycoprotein	Azgp1	3	0.540574	0.203426	19.3538	19.1482	19.3538	19.7987	19.163	19.1482	19.2489	18.2967
P19221	Prothrombin	F2	7	-0.222725	0.203503	20.265	20.4676	20.0691	20.5069	20.265	20.3962	20.6453	20.4676
P43274;P43276;P43277	Histone H1.4	H1-3;H1-4;H1-5	2	0.0548757	0.203505	22.5708	22.5451	22.6453	22.5475	22.5708	22.5615	22.4923	22.5451
Q8C0K5	Graves disease carrier protein homolog	Slc25a16	4	0.214129	0.203579	19.3079	19.2161	19.647	19.2696	19.3079	19.2161	19.0559	19.3101
P21278;P21279	Guanine nucleotide-binding protein subunit alpha-11	Gna11;Gnaq	3	0.365582	0.203826	21.6757	21.2764	21.6757	21.7013	21.6757	20.9243	21.7553	21.2764
Q9JLQ0	CD2-associated protein	Cd2ap	3	0.576534	0.203922	18.6417	17.9545	18.1801	18.6417	18.83	17.417	18.5508	17.9545
Q62283	Tetraspanin-7	Tspan7	2	-0.177568	0.203923	18.0479	18.1206	18.0691	17.786	18.0479	18.1206	18.0319	18.2832
P28352	DNA-(apurinic or apyrimidinic site) endonuclease	Apex1	6	0.24619	0.204897	21.0625	20.7634	20.9882	21.0625	21.0756	20.5356	21.0886	20.7634
Q6ZWQ0	Nesprin-2	Syne2	5	0.185975	0.205007	20.2764	20.0426	20.2764	20.3321	20.2302	19.9171	20.3211	20.0426
Q8JZY4	Mitochondrial ribonuclease P catalytic subunit	Prorp	2	1.13944	0.205394	18.1946	16.6615	18.8847	18.1946	17.7731	16.2832	18.4894	16.6615
Q9Z1X4	Interleukin enhancer-binding factor 3	Ilf3	18	0.243951	0.205534	21.2707	20.9171	21.2707	21.0625	21.2989	20.7471	21.2361	20.9171
Q3UE37	Ubiquitin-conjugating enzyme E2 Z	Ube2z	4	0.102925	0.205621	20.3962	20.343	20.3962	20.3321	20.4476	20.343	20.3538	20.1703
Q9DC22	DDB1- and CUL4-associated factor 6	Dcaf6	2	-0.388433	0.205682	17.5356	17.9142	17.7987	17.5356	17.1457	17.5657	17.9141	18.1655
P35285	Ras-related protein Rab-22A	Rab22a	3	-0.229369	0.205767	17.7602	18.0265	17.7602	18.0156	17.5508	18.0265	18.1155	17.8727
Q9D0C4	tRNA (guanine(37)-N1)-methyltransferase	Trmt5	2	0.260914	0.20591	19.0047	18.6204	19.0047	19.1206	18.7891	18.6204	18.5204	18.9909
P08752	Guanine nucleotide-binding protein G(i) subunit alpha-2	Gnai2	8	0.145976	0.206175	23.4425	23.2961	23.48	23.3778	23.4425	23.2961	23.4425	23.1238
Q9D8B3	Charged multivesicular body protein 4b	Chmp4b	8	0.129475	0.206207	21.6141	21.5261	21.6141	21.6141	21.5731	21.5261	21.5823	21.3045
Q6PGB6	N-alpha-acetyltransferase 50	Naa50	4	-0.135848	0.206402	19.7892	19.8591	19.8515	19.7891	19.7876	19.856	20.1206	19.8591
Q3U3R4	Lipase maturation factor 1	Lmf1	7	-0.297824	0.206476	20.1457	20.4576	19.7488	20.1457	20.3538	20.4576	20.4775	20.2066
Q9CQE1	Protein NipSnap homolog 3B	Nipsnap3b	3	0.33469	0.206848	19.3343	19.0399	19.692	19.3343	19.0129	19.1777	19.0399	18.8175
Q91VH6	Protein MEMO1	Memo1	7	0.144473	0.207079	21.3805	21.1765	21.3805	21.4221	21.2933	21.391	21.0951	21.1765
Q9Z1X2	Phosphatidylserine synthase 2	Ptdss2	2	0.269314	0.207292	18.8606	18.5915	18.5842	18.8606	19.0074	18.3056	18.5915	18.7471
E9Q3H6	Coenzyme Q10A	Coq10a	8	-0.138775	0.207814	24.239	24.3975	24.3376	24.239	24.0935	24.2463	24.4425	24.3975
Q9D2C7	Bax inhibitor 1	Tmbim6	2	0.211535	0.207891	19.3709	19.2255	19.4354	19.1703	19.3709	19.2255	19.2349	18.8817
Q8VE97	Serine/arginine-rich splicing factor 4	Srsf4	5	0.118398	0.208017	19.895	19.805	19.8757	19.9742	19.895	19.6662	19.9185	19.805
[truncated: 2,787 more rows]

## Sheet: GO_downregulated proteins
Term	Overlap	P-value	Adjusted P-value	Odds Ratio	Combined Score	Genes
tRNA aminoacylation for protein translation (GO:0006418)	15/43	4.98452e-17	9.36592e-14	35.8291	1344.94	RARS1;KARS1;MARS1;DARS1;AIMP1;AIMP2;SARS2;QARS1;EPRS1;LARS1;TARS2;IARS1;TARS3;EEF1E1;CARS2
fatty acid catabolic process (GO:0009062)	15/70	1.63183e-13	1.5331e-10	18.2152	536.327	PECR;ACADVL;ABCD3;ECHS1;HSD17B4;NUDT7;PCCA;EHHADH;PCCB;NUDT19;ECHDC2;MMUT;ACAD11;LPIN1;ABCD1
tRNA aminoacylation (GO:0043039)	12/38	2.8259e-13	1.76996e-10	30.5594	883.008	AIMP1;AIMP2;RARS1;SARS2;QARS1;EPRS1;KARS1;LARS1;MARS1;IARS1;EEF1E1;DARS1
fatty acid beta-oxidation (GO:0006635)	12/52	1.77599e-11	8.3427e-09	19.8495	491.356	ACADVL;ABCD3;ECHS1;AMACR;EHHADH;ETFDH;HSD17B4;ECHDC2;ETFB;ACOX3;ACAD11;ABCD1
branched-chain amino acid catabolic process (GO:0009083)	8/20	3.1795e-10	9.95713e-08	43.5858	953.184	MCCC2;BCKDK;ALDH6A1;ECHS1;BCKDHB;MCCC1;DBT;ACADSB
branched-chain amino acid metabolic process (GO:0009081)	8/20	3.1795e-10	9.95713e-08	43.5858	953.184	MCCC2;BCKDK;ALDH6A1;ECHS1;BCKDHB;MCCC1;DBT;ACADSB
cellular amino acid catabolic process (GO:0009063)	13/90	1.25811e-09	3.37712e-07	11.1873	229.27	MCCC2;ECHS1;GOT1;ARG1;SHMT1;BCKDHB;MCCC1;HNMT;ACADSB;BCKDK;QDPR;ALDH6A1;DBT
fructose metabolic process (GO:0006000)	5/8	4.5947e-08	1.07918e-05	107.939	1823.71	SORD;AKR1B1;ALDOA;FBP2;KHK
translation (GO:0006412)	16/214	2.3778e-07	4.96432e-05	5.37608	81.9956	RARS1;FASTKD2;KARS1;MARS1;APEH;RPL3L;DARS1;AIMP1;AIMP2;SARS2;EPRS1;QARS1;LARS1;IARS1;EEF1E1;MRRF
fatty acid oxidation (GO:0019395)	9/59	2.84867e-07	5.35264e-05	11.7846	177.609	PECR;ACADVL;ABCD3;ECHS1;EHHADH;HSD17B4;ECHDC2;ACAD11;ABCD1
phosphate-containing compound metabolic process (GO:0006796)	15/212	1.14313e-06	0.000195268	5.04869	69.0748	PFKFB1;STAT3;LPL;PLA2G4A;ACYP2;BCKDK;CDK5;IMPA2;GPD2;ACP6;PLBD1;COQ8A;ALDOA;PFKM;FBP2
respiratory electron transport chain (GO:0022904)	5/14	1.52191e-06	0.000238306	35.9686	481.819	GPD2;ETFDH;ETFRF1;ETFB;SLC25A22
cellular response to caffeine (GO:0071313)	4/7	1.88548e-06	0.000249138	86.0678	1134.49	RYR1;RYR2;GSTM2;RYR3
response to caffeine (GO:0031000)	4/7	1.88548e-06	0.000249138	86.0678	1134.49	RYR1;RYR2;GSTM2;RYR3
fatty acid beta-oxidation using acyl-CoA oxidase (GO:0033540)	5/15	2.25404e-06	0.000249138	32.3701	420.901	AMACR;EHHADH;HSD17B4;ACOX3;ABCD1
glucan catabolic process (GO:0009251)	5/15	2.25404e-06	0.000249138	32.3701	420.901	PHKG1;AGL;GAA;PYGM;PYGL
glycogen catabolic process (GO:0005980)	5/15	2.25404e-06	0.000249138	32.3701	420.901	PHKG1;AGL;GAA;PYGM;PYGL
water-soluble vitamin metabolic process (GO:0006767)	9/76	2.56677e-06	0.000267942	8.78687	113.112	MCCC2;PRSS1;PCCA;MMAB;SHMT1;MCCC1;PCCB;AOX1;MMUT
cellular polysaccharide catabolic process (GO:0044247)	5/16	3.23721e-06	0.000320143	29.4258	371.966	PHKG1;AGL;GAA;PYGM;PYGL
fatty acid metabolic process (GO:0006631)	11/124	3.59998e-06	0.000338218	6.39538	80.1634	ABCD3;GPAM;ACSL1;PNPLA8;ALOX5;NUDT19;ACOT1;LPL;MLYCD;LPIN1;ACADSB
biotin metabolic process (GO:0006768)	4/9	6.62346e-06	0.000592642	51.6354	615.747	MCCC2;PCCA;MCCC1;PCCB
cellular response to purine-containing compound (GO:0071415)	4/10	1.09048e-05	0.000890873	43.0273	491.643	RYR1;RYR2;GSTM2;RYR3
fatty acid beta-oxidation using acyl-CoA dehydrogenase (GO:0033539)	4/10	1.09048e-05	0.000890873	43.0273	491.643	ACADVL;ETFDH;ETFB;ACAD11
linoleic acid metabolic process (GO:0043651)	5/21	1.41537e-05	0.00110812	20.2251	225.824	GSTM2;ACSL1;PNPLA8;ALOX5;ABCD1
unsaturated fatty acid metabolic process (GO:0033559)	7/54	1.86616e-05	0.00140261	9.68776	105.49	GSTM2;ACSL1;PNPLA8;ALOX5;PLA2G4A;HSD17B4;ABCD1
regulation of cardiac conduction (GO:1903779)	7/55	2.11029e-05	0.00152509	9.48544	102.121	RYR1;RYR2;TMEM65;ATP2A2;ABCC9;TNNI3K;RYR3
lipid biosynthetic process (GO:0008610)	8/80	3.27542e-05	0.00227945	7.24216	74.786	ABCD3;DHRS11;GPAM;ACSL1;ALOX5;LPL;FITM2;MLYCD
hexose metabolic process (GO:0019318)	6/41	3.69489e-05	0.00247953	11.1208	113.499	GAA;SORD;GALM;ALDOA;FBP2;KHK
long-chain fatty acid metabolic process (GO:0001676)	8/83	4.28208e-05	0.00277449	6.95141	69.9206	GSTM2;ACSL1;PNPLA8;ALOX5;PLA2G4A;ACOT1;HSD17B4;ABCD1
glucose metabolic process (GO:0006006)	7/62	4.66358e-05	0.00290646	8.27526	82.5303	PFKFB1;GOT1;GAA;SORD;GALM;ALDOA;FBP2
glutathione metabolic process (GO:0006749)	6/43	4.88155e-05	0.00290646	10.5186	104.423	GSTK1;GSTM2;GSTM1;GSTA3;CHAC2;OPLAH
NAD biosynthesis via nicotinamide riboside salvage pathway (GO:0034356)	4/14	4.94979e-05	0.00290646	25.8111	255.881	RNLS;NAPRT;NAMPT;NAXD
hexose biosynthetic process (GO:0019319)	6/44	5.57957e-05	0.00317697	10.2413	100.301	PFKFB1;GOT1;SORD;AKR1B1;ALDOA;FBP2
glycogen metabolic process (GO:0005977)	5/28	6.2558e-05	0.00345725	14.0646	136.138	PHKG1;AGL;GAA;PYGM;PYGL
monocarboxylic acid metabolic process (GO:0032787)	10/143	7.82649e-05	0.00420171	4.91815	46.5031	MCCC2;AMACR;PCCA;GPAM;PNPLA8;MCCC1;PCCB;ACOT1;LPL;ACADSB
regulation of heart contraction (GO:0008016)	8/93	9.6774e-05	0.00505107	6.13047	56.6647	RYR1;RYR2;TMEM65;HRC;ATP2A2;ABCC9;TNNI3K;RYR3
very long-chain fatty acid metabolic process (GO:0000038)	5/33	0.000141818	0.00712545	11.5502	102.346	ABCD3;ACSL1;ACOT1;TECRL;ABCD1
cellular response to alkaloid (GO:0071312)	4/18	0.000144102	0.00712545	18.4328	163.038	RYR1;RYR2;GSTM2;RYR3
muscle contraction (GO:0006936)	9/129	0.000180917	0.00871647	4.89275	42.1631	RYR1;ACTA1;SMTN;MYL7;TPM3;CALD1;HRC;TCAP;ALDOA
neutrophil degranulation (GO:0043312)	19/481	0.00019028	0.00884932	2.72691	23.3614	CTSA;VCP;CAB39;ARG1;GAA;AGL;IDH1;PYGL;APEH;GNS;ALAD;FLG2;SDCBP;ALOX5;CREG1;NAPRT;AGA;ALDOA;CTSD
short-chain fatty acid catabolic process (GO:0019626)	3/8	0.000193093	0.00884932	38.6	330.12	PCCA;PCCB;MMUT
neutrophil activation involved in immune response (GO:0002283)	19/485	0.000211324	0.00945421	2.70294	22.8726	CTSA;VCP;CAB39;ARG1;GAA;AGL;IDH1;PYGL;APEH;GNS;ALAD;FLG2;SDCBP;ALOX5;CREG1;NAPRT;AGA;ALDOA;CTSD
neutrophil mediated immunity (GO:0002446)	19/488	0.000228419	0.00998138	2.68523	22.5138	CTSA;VCP;CAB39;ARG1;GAA;AGL;IDH1;PYGL;APEH;GNS;ALAD;FLG2;SDCBP;ALOX5;CREG1;NAPRT;AGA;ALDOA;CTSD
regulation of cardiac muscle contraction by calcium ion signaling (GO:0010882)	4/21	0.000271728	0.0109798	15.1776	124.619	RYR2;GSTM2;HRC;ATP2A2
NAD biosynthetic process (GO:0009435)	4/21	0.000271728	0.0109798	15.1776	124.619	RNLS;NAPRT;NAMPT;NAXD
fructose 1,6-bisphosphate metabolic process (GO:0030388)	3/9	0.000286329	0.0109798	32.165	262.414	ALDOA;PFKM;FBP2
hepoxilin biosynthetic process (GO:0051122)	3/9	0.000286329	0.0109798	32.165	262.414	GSTM2;GSTM1;ALOX5
hepoxilin metabolic process (GO:0051121)	3/9	0.000286329	0.0109798	32.165	262.414	GSTM2;GSTM1;ALOX5
short-chain fatty acid metabolic process (GO:0046459)	3/9	0.000286329	0.0109798	32.165	262.414	PCCA;PCCB;MMUT
peptide metabolic process (GO:0006518)	7/83	0.000298761	0.0112275	5.98227	48.5513	NPEPPS;GSTK1;GSTM2;GSTM1;GSTA3;APEH;OPLAH
response to insulin (GO:0032868)	7/84	0.000321676	0.0116318	5.90427	47.482	TBC1D4;GOT1;EPRS1;MARS1;MEAK7;LPIN1;KHK
glutathione derivative biosynthetic process (GO:1901687)	4/22	0.000328093	0.0116318	14.3337	114.988	GSTK1;GSTM2;GSTM1;GSTA3
glutathione derivative metabolic process (GO:1901685)	4/22	0.000328093	0.0116318	14.3337	114.988	GSTK1;GSTM2;GSTM1;GSTA3
sulfur compound catabolic process (GO:0044273)	5/40	0.000359956	0.0125251	9.23684	73.2438	NUDT7;FITM2;CHAC2;MLYCD;GNS
regulation of release of sequestered calcium ion into cytosol by sarcoplasmic reticulum (GO:0010880)	4/23	0.000392362	0.0134045	13.5786	106.501	RYR2;GSTM2;DHRS7C;HRC
sarcoplasmic reticulum calcium ion transport (GO:0070296)	3/10	0.000404368	0.013568	27.5686	215.399	RYR1;RYR2;ATP2A2
monocarboxylic acid biosynthetic process (GO:0072330)	6/63	0.000420147	0.0138501	6.82091	53.032	ABCD3;AMACR;ALOX5;HSD17B4;LPL;MLYCD
cellular respiration (GO:0045333)	5/42	0.000453773	0.0147007	8.73666	67.2541	NDUFS7;ETFDH;ETFRF1;ETFB;COX10
peroxisome organization (GO:0007031)	4/25	0.000547051	0.0174222	12.2842	92.2659	TMEM135;ABCD3;PEX11B;ABCD1
alpha-amino acid metabolic process (GO:1901605)	5/46	0.000695318	0.0217751	7.8827	57.3162	OAT;GOT1;KYAT3;GPT;MMUT
fatty acid biosynthetic process (GO:0006633)	6/71	0.000798947	0.0246102	5.97898	42.6434	ABCD3;ALOX5;LPL;MLYCD;TECRL;ABCD1
alpha-linolenic acid metabolic process (GO:0036109)	3/13	0.00093114	0.0282195	19.2951	134.662	ACSL1;HSD17B4;ABCD1
phospholipid metabolic process (GO:0006644)	6/76	0.00114368	0.0341107	5.5505	37.5963	GPAM;ACP6;PLA2G4A;PLBD1;LPL;FITM2
protein homotetramerization (GO:0051289)	5/52	0.00122265	0.0358963	6.8743	46.1041	RYR1;SHMT1;APIP;ALDOA;RYR3
triglyceride homeostasis (GO:0070328)	4/31	0.00126516	0.0360187	9.55143	63.7324	PNPLA8;LPL;FITM2;APOA4
prostaglandin metabolic process (GO:0006693)	4/31	0.00126516	0.0360187	9.55143	63.7324	GSTM1;PNPLA8;PLA2G4A;PTGDS
electron transport chain (GO:0022900)	3/15	0.00144782	0.0395115	16.0776	105.111	ETFDH;ETFRF1;ETFB
prostanoid biosynthetic process (GO:0046457)	3/15	0.00144782	0.0395115	16.0776	105.111	PNPLA8;PLA2G4A;PTGDS
striated muscle contraction (GO:0006941)	5/54	0.00145093	0.0395115	6.59305	43.0892	RYR2;GRK2;GAA;TCAP;ALDOA
regulation of fatty acid oxidation (GO:0046320)	3/16	0.00176166	0.0472881	14.8401	94.1086	ACADVL;MLYCD;ABCD1
cardiac muscle contraction (GO:0060048)	4/34	0.0017982	0.047589	8.59497	54.3286	RYR2;GRK2;GAA;TCAP
cellular amide metabolic process (GO:0043603)	7/115	0.00207539	0.052287	4.20288	25.9637	MCCC2;PCCA;SHMT1;MCCC1;PCCB;ACOT1;MLYCD
purine ribonucleotide transport (GO:0015868)	3/17	0.00211485	0.052287	13.7794	84.8642	ABCC4;LRRC8C;SLC25A42
regulation of cardiac muscle contraction by regulation of the release of sequestered calcium ion (GO:0010881)	3/17	0.00211485	0.052287	13.7794	84.8642	RYR2;GSTM2;HRC
response to purine-containing compound (GO:0014074)	3/17	0.00211485	0.052287	13.7794	84.8642	RYR1;RYR2;ABCC9
positive regulation of heart rate (GO:0010460)	3/17	0.00211485	0.052287	13.7794	84.8642	RYR2;HRC;ATP2A2
protein targeting to membrane (GO:0006612)	6/87	0.00229432	0.0541893	4.79403	29.1349	SDCBP;ABCD3;PEX11B;SRPRA;ABCD1;SIL1
alditol phosphate metabolic process (GO:0052646)	2/5	0.00230716	0.0541893	42.7535	259.588	GPAM;ACP6
fatty acid derivative catabolic process (GO:1901569)	2/5	0.00230716	0.0541893	42.7535	259.588	BDH1;FITM2
leucine catabolic process (GO:0006552)	2/5	0.00230716	0.0541893	42.7535	259.588	MCCC2;MCCC1
adenine nucleotide transport (GO:0051503)	3/18	0.00250901	0.0582028	12.8601	77.0048	ABCC4;LRRC8C;SLC25A42
mitochondrial respiratory chain complex assembly (GO:0033108)	6/90	0.00272228	0.06238	4.62211	27.2995	NDUFA13;NDUFA6;TIMMDC1;NDUFS7;SDHAF2;COX20
prostaglandin biosynthetic process (GO:0001516)	3/19	0.00294564	0.066685	12.0558	70.2541	PNPLA8;PLA2G4A;PTGDS
diterpenoid metabolic process (GO:0016101)	5/64	0.00308674	0.0682351	5.47279	31.6362	PECR;GPC1;AKR1B1;LPL;APOA4
lipid homeostasis (GO:0055088)	5/64	0.00308674	0.0682351	5.47279	31.6362	PNPLA8;APOA4;FITM2;ACOX3;ABCD1
organonitrogen compound biosynthetic process (GO:1901566)	8/158	0.00323446	0.0706693	3.46241	19.8531	GSTK1;SLC25A15;GSTM2;GSTM1;ARG1;GSTA3;PLA2G4A;LPIN1
release of sequestered calcium ion into cytosol by sarcoplasmic reticulum (GO:0014808)	2/6	0.00342546	0.0707447	32.0635	182.009	RYR1;RYR2
skeletal muscle thin filament assembly (GO:0030240)	2/6	0.00342546	0.0707447	32.0635	182.009	ACTA1;TCAP
striated muscle hypertrophy (GO:0014897)	2/6	0.00342546	0.0707447	32.0635	182.009	RYR2;TCAP
monoubiquitinated protein deubiquitination (GO:0035520)	2/6	0.00342546	0.0707447	32.0635	182.009	USP47;USP15
positive regulation of heart contraction (GO:0045823)	3/20	0.00342616	0.0707447	11.346	64.4036	RYR2;HRC;ATP2A2
gluconeogenesis (GO:0006094)	4/41	0.00360844	0.0729059	6.96642	39.1825	PFKFB1;GOT1;ALDOA;FBP2
heart contraction (GO:0060047)	4/41	0.00360844	0.0729059	6.96642	39.1825	RYR2;GRK2;GAA;TCAP
cellular response to insulin stimulus (GO:0032869)	7/129	0.00394688	0.0781645	3.71792	20.5781	GOT1;EPRS1;ATP6AP1;TBC1D4;NAMPT;MARS1;LPIN1
cobalamin metabolic process (GO:0009235)	3/21	0.00395191	0.0781645	10.7151	59.2928	PRSS1;MMAB;MMUT
organic anion transport (GO:0015711)	6/99	0.00436747	0.0825144	4.17289	22.6737	ABCC4;CA3;CA4;LRRC8C;SLC25A42;CA14
glutamate metabolic process (GO:0006536)	3/22	0.00452409	0.0825144	10.1507	54.7968	OAT;GOT1;DGLUCY
tetrapyrrole metabolic process (GO:0033013)	3/22	0.00452409	0.0825144	10.1507	54.7968	PRSS1;MMAB;MMUT
protein import into peroxisome membrane (GO:0045046)	3/22	0.00452409	0.0825144	10.1507	54.7968	ABCD3;PEX11B;ABCD1
aerobic electron transport chain (GO:0019646)	5/70	0.00454662	0.0825144	4.96609	26.784	NDUFA13;NDUFA6;NDUFS7;SDHAF2;COX10
arginine catabolic process (GO:0006527)	2/7	0.00474682	0.0825144	25.6495	137.232	OAT;ARG1
cyclic nucleotide transport (GO:0070729)	2/7	0.00474682	0.0825144	25.6495	137.232	ABCC4;LRRC8C
cytochrome complex assembly (GO:0017004)	2/7	0.00474682	0.0825144	25.6495	137.232	HCCS;COX10
release of sequestered calcium ion into cytosol by endoplasmic reticulum (GO:1903514)	2/7	0.00474682	0.0825144	25.6495	137.232	RYR1;RYR2
response to alkaloid (GO:0043279)	2/7	0.00474682	0.0825144	25.6495	137.232	RYR1;RYR2
leucine metabolic process (GO:0006551)	2/7	0.00474682	0.0825144	25.6495	137.232	MCCC2;MCCC1
very long-chain fatty acid catabolic process (GO:0042760)	2/7	0.00474682	0.0825144	25.6495	137.232	ABCD3;ABCD1
xenobiotic catabolic process (GO:0042178)	2/7	0.00474682	0.0825144	25.6495	137.232	GSTM2;GSTM1
protein tetramerization (GO:0051262)	5/71	0.00483054	0.0825144	4.8906	26.0806	RYR1;SHMT1;APIP;ALDOA;RYR3
mitochondrial ATP synthesis coupled electron transport (GO:0042775)	5/71	0.00483054	0.0825144	4.8906	26.0806	NDUFA13;NDUFA6;NDUFS7;SDHAF2;COX10
acylglycerol biosynthetic process (GO:0046463)	3/23	0.00514385	0.0870747	9.64265	50.8163	GPAM;PLA2G4A;LPIN1
purine ribonucleotide catabolic process (GO:0009154)	3/24	0.00581224	0.0975107	9.18301	47.2722	NUDT7;FITM2;MLYCD
cardiac muscle hypertrophy (GO:0003300)	2/8	0.00626473	0.101478	21.3735	108.424	RYR2;TCAP
skeletal myofibril assembly (GO:0014866)	2/8	0.00626473	0.101478	21.3735	108.424	ACTA1;TCAP
tRNA aminoacylation for mitochondrial protein translation (GO:0070127)	2/8	0.00626473	0.101478	21.3735	108.424	SARS2;TARS2
tubulin complex assembly (GO:0007021)	2/8	0.00626473	0.101478	21.3735	108.424	TBCEL;VBP1
acylglycerol homeostasis (GO:0055090)	3/25	0.00653022	0.103112	8.76515	44.1002	PNPLA8;LPL;APOA4
negative regulation of sequestering of calcium ion (GO:0051283)	3/25	0.00653022	0.103112	8.76515	44.1002	RYR1;RYR2;RYR3
phosphatidylglycerol metabolic process (GO:0046471)	3/25	0.00653022	0.103112	8.76515	44.1002	GPAM;PNPLA8;PLA2G4A
regulation of translation (GO:0006417)	8/178	0.00658908	0.103174	3.05194	15.3279	CNOT7;MTRES1;EPRS1;SHMT1;CAPRIN1;LARP4B;LARP4;EIF4G2
phosphatidylcholine metabolic process (GO:0046470)	5/77	0.00680341	0.10561	4.48168	22.3651	PNPLA8;PLA2G4A;PLBD1;APOA4;LPIN1
inner mitochondrial membrane organization (GO:0007007)	4/49	0.00685707	0.10561	5.72561	28.5277	APOO;NDUFA13;MICOS13;ATP5MG
purine-containing compound biosynthetic process (GO:0072522)	3/26	0.00729868	0.108843	8.38363	41.248	DGUOK;ADSL;SHMT1
RNA polyadenylation (GO:0043631)	3/26	0.00729868	0.108843	8.38363	41.248	FIP1L1;MTPAP;GRSF1
mRNA polyadenylation (GO:0006378)	3/26	0.00729868	0.108843	8.38363	41.248	FIP1L1;MTPAP;GRSF1
phosphatidylethanolamine acyl-chain remodeling (GO:0036152)	3/26	0.00729868	0.108843	8.38363	41.248	PNPLA8;PLA2G4A;PLBD1
purine nucleobase metabolic process (GO:0006144)	2/9	0.00797285	0.112166	18.3192	88.5132	GDA;SHMT1
regulation of cellular response to oxidative stress (GO:1900407)	2/9	0.00797285	0.112166	18.3192	88.5132	ALOX5;ABCD1
chylomicron remodeling (GO:0034371)	2/9	0.00797285	0.112166	18.3192	88.5132	LPL;APOA4
skeletal muscle fiber development (GO:0048741)	2/9	0.00797285	0.112166	18.3192	88.5132	RYR1;ACTA1
lipoprotein metabolic process (GO:0042157)	2/9	0.00797285	0.112166	18.3192	88.5132	APOA4;CTSD
very-low-density lipoprotein particle remodeling (GO:0034372)	2/9	0.00797285	0.112166	18.3192	88.5132	LPL;APOA4
positive regulation of sequestering of triglyceride (GO:0010890)	2/9	0.00797285	0.112166	18.3192	88.5132	LPL;FITM2
cellular lipid catabolic process (GO:0044242)	3/27	0.00811843	0.112166	8.03391	38.6722	NUDT19;PLBD1;LPIN1
release of sequestered calcium ion into cytosol (GO:0051209)	3/27	0.00811843	0.112166	8.03391	38.6722	RYR1;RYR2;RYR3
peroxisomal membrane transport (GO:0015919)	3/27	0.00811843	0.112166	8.03391	38.6722	ABCD3;PEX11B;ABCD1
sulfur compound biosynthetic process (GO:0044272)	6/113	0.00824114	0.11303	3.62432	17.3917	GSTK1;GSTM2;GSTM1;GSTA3;CHAC2;OPLAH
positive regulation of cytoskeleton organization (GO:0051495)	5/82	0.00883035	0.120234	4.18959	19.8149	CDK5;SYNPO2;TEK;NES;MYLK3
cristae formation (GO:0042407)	3/28	0.00899019	0.120661	7.71216	36.3368	APOO;MICOS13;ATP5MG
regulation of small molecule metabolic process (GO:0062012)	3/28	0.00899019	0.120661	7.71216	36.3368	BCKDK;ACADVL;MLYCD
fructose 6-phosphate metabolic process (GO:0006002)	2/10	0.00986498	0.125031	16.0285	74.0319	PFKM;FBP2
removal of superoxide radicals (GO:0019430)	2/10	0.00986498	0.125031	16.0285	74.0319	PRDX1;APOA4
urea cycle (GO:0000050)	2/10	0.00986498	0.125031	16.0285	74.0319	SLC25A15;ARG1
phosphatidylcholine catabolic process (GO:0034638)	2/10	0.00986498	0.125031	16.0285	74.0319	PNPLA8;PLA2G4A
protein targeting to peroxisome (GO:0006625)	3/29	0.00991463	0.125031	7.41516	34.2116	ABCD3;PEX11B;ABCD1
glial cell differentiation (GO:0010001)	3/29	0.00991463	0.125031	7.41516	34.2116	CDK5;GPC1;STAT3
glycolytic process (GO:0006096)	3/29	0.00991463	0.125031	7.41516	34.2116	PFKFB1;ALDOA;PFKM
hydrogen peroxide metabolic process (GO:0042743)	3/29	0.00991463	0.125031	7.41516	34.2116	MAOB;PRDX1;APOA4
lipid catabolic process (GO:0016042)	3/29	0.00991463	0.125031	7.41516	34.2116	LIPE;LPL;APOA4
G1/S transition of mitotic cell cycle (GO:0000082)	5/85	0.0102284	0.128127	4.03187	18.4764	PCNA;CUL5;CDK5;CDK4;CUL1
negative regulation of cellular amide metabolic process (GO:0034249)	5/86	0.0107262	0.132901	3.98189	18.0581	RTN2;CNOT7;EPRS1;SHMT1;CAPRIN1
regulation of striated muscle contraction (GO:0006942)	3/30	0.0108923	0.132901	7.14016	32.2714	RYR2;GRK2;TNNI3K
long-chain fatty acid biosynthetic process (GO:0042759)	3/30	0.0108923	0.132901	7.14016	32.2714	GSTM2;GSTM1;ALOX5
phosphatidylcholine acyl-chain remodeling (GO:0036151)	3/30	0.0108923	0.132901	7.14016	32.2714	PNPLA8;PLA2G4A;PLBD1
protein homooligomerization (GO:0051260)	6/121	0.0113272	0.136744	3.37081	15.1031	RYR1;ALAD;SHMT1;APIP;ALDOA;RYR3
arachidonic acid metabolic process (GO:0019369)	4/57	0.0116163	0.136744	4.85939	21.6502	PNPLA8;ALOX5;PLA2G4A;PTGDS
dicarboxylic acid metabolic process (GO:0043648)	4/57	0.0116163	0.136744	4.85939	21.6502	GOT1;SHMT1;IDH1;DGLUCY
negative regulation of cell cycle G2/M phase transition (GO:1902750)	4/57	0.0116163	0.136744	4.85939	21.6502	USP47;PSME4;CUL1;PSMF1
cellular glucan metabolic process (GO:0006073)	2/11	0.0119351	0.136744	14.2468	63.0889	PYGM;PYGL
cellular response to superoxide (GO:0071451)	2/11	0.0119351	0.136744	14.2468	63.0889	PRDX1;APOA4
glutathione biosynthetic process (GO:0006750)	2/11	0.0119351	0.136744	14.2468	63.0889	CHAC2;OPLAH
interleukin-35-mediated signaling pathway (GO:0070757)	2/11	0.0119351	0.136744	14.2468	63.0889	CANX;STAT3
myotube cell development (GO:0014904)	2/11	0.0119351	0.136744	14.2468	63.0889	RYR1;ACTA1
negative regulation of sprouting angiogenesis (GO:1903671)	2/11	0.0119351	0.136744	14.2468	63.0889	ALOX5;EPN1
mitochondrial respiratory chain complex I assembly (GO:0032981)	4/58	0.0123287	0.139552	4.76916	20.9644	NDUFA13;NDUFA6;TIMMDC1;NDUFS7
NADH dehydrogenase complex assembly (GO:0010257)	4/58	0.0123287	0.139552	4.76916	20.9644	NDUFA13;NDUFA6;TIMMDC1;NDUFS7
long-chain fatty acid transport (GO:0015909)	3/32	0.0130095	0.146377	6.64706	28.862	ABCD3;ACSL1;ABCD1
negative regulation of mitotic cell cycle phase transition (GO:1901991)	5/92	0.0140639	0.153097	3.70614	15.8035	USP47;CDK4;PSME4;CUL1;PSMF1
regulation of sprouting angiogenesis (GO:1903670)	3/33	0.0141499	0.153097	6.42516	27.3587	TJP1;ALOX5;EPN1
regulation of response to oxidative stress (GO:1902882)	2/12	0.0141772	0.153097	12.8215	54.5699	ALOX5;ABCD1
mitochondrion distribution (GO:0048311)	2/12	0.0141772	0.153097	12.8215	54.5699	CLUH;TRAK1
negative regulation of heart contraction (GO:0045822)	2/12	0.0141772	0.153097	12.8215	54.5699	GRK2;RNLS
nonribosomal peptide biosynthetic process (GO:0019184)	2/12	0.0141772	0.153097	12.8215	54.5699	CHAC2;OPLAH
positive regulation of fatty acid oxidation (GO:0046321)	2/12	0.0141772	0.153097	12.8215	54.5699	MLYCD;ABCD1
negative regulation of cellular protein metabolic process (GO:0032269)	5/94	0.0153154	0.163828	3.62249	15.138	CNOT7;CDK5;EPRS1;SHMT1;CAPRIN1
regulation of glucose metabolic process (GO:0010906)	3/34	0.0153452	0.163828	6.21758	25.9705	BCKDK;MLYCD;KHK
organonitrogen compound catabolic process (GO:1901565)	4/63	0.0163076	0.171338	4.36388	17.9623	BCKDK;NPEPPS;PNPLA8;PLA2G4A
icosanoid secretion (GO:0032309)	2/13	0.0165855	0.171338	11.6553	47.7777	ABCC4;PNPLA8
triglyceride-rich lipoprotein particle remodeling (GO:0034370)	2/13	0.0165855	0.171338	11.6553	47.7777	LPL;APOA4
pentose-phosphate shunt (GO:0006098)	2/13	0.0165855	0.171338	11.6553	47.7777	RPIA;RBKS
positive regulation of fatty acid biosynthetic process (GO:0045723)	2/13	0.0165855	0.171338	11.6553	47.7777	APOA4;ABCD1
bicarbonate transport (GO:0015701)	3/35	0.0165958	0.171338	6.02298	24.6858	CA3;CA4;CA14
regulation of cardiac muscle contraction (GO:0055117)	3/36	0.0179018	0.183812	5.84017	23.4941	RYR2;ATP2A2;TNNI3K
antigen processing and presentation of exogenous peptide antigen via MHC class II (GO:0019886)	5/98	0.0180372	0.183833	3.46597	13.917	DYNC1LI2;SAR1B;CANX;CTSD;LGMN
chemical homeostasis (GO:0048878)	4/65	0.0180996	0.183833	4.22037	16.9316	PNPLA8;APOA4;FITM2;ACOX3
negative regulation of G2/M transition of mitotic cell cycle (GO:0010972)	4/66	0.0190396	0.188521	4.15209	16.4474	USP47;PSME4;CUL1;PSMF1
2-oxoglutarate metabolic process (GO:0006103)	2/14	0.0191545	0.188521	10.6835	42.2555	GOT1;IDH1
cardiolipin metabolic process (GO:0032048)	2/14	0.0191545	0.188521	10.6835	42.2555	PNPLA8;PLA2G4A
coenzyme A metabolic process (GO:0015936)	2/14	0.0191545	0.188521	10.6835	42.2555	PANK4;NUDT7
cellular calcium ion homeostasis (GO:0006874)	6/136	0.0191648	0.188521	2.97959	11.7833	RYR1;RYR2;CCDC47;HRC;NPTN;ATP2A2
regulation of actin cytoskeleton reorganization (GO:2000249)	3/37	0.0192635	0.188521	5.66811	22.3864	TJP1;CDK5;TEK
glutamine family amino acid metabolic process (GO:0009064)	3/37	0.0192635	0.188521	5.66811	22.3864	OAT;GOT1;DGLUCY
antigen processing and presentation of peptide antigen via MHC class II (GO:0002495)	5/100	0.0195105	0.189949	3.39266	13.3562	DYNC1LI2;SAR1B;CANX;CTSD;LGMN
actin-myosin filament sliding (GO:0033275)	3/38	0.0206809	0.198262	5.50588	21.3548	ACTA1;TPM3;TCAP
muscle filament sliding (GO:0030049)	3/38	0.0206809	0.198262	5.50588	21.3548	ACTA1;TPM3;TCAP
negative regulation of proteasomal protein catabolic process (GO:1901799)	3/38	0.0206809	0.198262	5.50588	21.3548	ALAD;SDCBP;PSMF1
antigen processing and presentation of exogenous peptide antigen (GO:0002478)	5/103	0.0218649	0.199949	3.2883	12.5707	DYNC1LI2;SAR1B;CANX;CTSD;LGMN
acetyl-CoA metabolic process (GO:0006084)	2/15	0.0218787	0.199949	9.86119	37.6919	NUDT7;MLYCD
regulation of aerobic respiration (GO:1903715)	2/15	0.0218787	0.199949	9.86119	37.6919	VCP;ABCD1
cardiac myofibril assembly (GO:0055003)	2/15	0.0218787	0.199949	9.86119	37.6919	TCAP;MYLK3
regulation of sequestering of triglyceride (GO:0010889)	2/15	0.0218787	0.199949	9.86119	37.6919	LPL;FITM2
response to muscle stretch (GO:0035994)	2/15	0.0218787	0.199949	9.86119	37.6919	RYR2;TCAP
icosanoid biosynthetic process (GO:0046456)	2/15	0.0218787	0.199949	9.86119	37.6919	ALOX5;PLA2G4A
interleukin-27-mediated signaling pathway (GO:0070106)	2/15	0.0218787	0.199949	9.86119	37.6919	STAT3;CANX
protein localization to cell-cell junction (GO:0150105)	2/15	0.0218787	0.199949	9.86119	37.6919	TJP1;SCRIB
positive regulation of cell motility (GO:2000147)	8/221	0.0219209	0.199949	2.43046	9.28512	TJP1;PTP4A1;SDCBP;RIPOR1;HSPA5;CCDC25;SEMA4B;STAT3
mitochondrial electron transport, NADH to ubiquinone (GO:0006120)	3/39	0.0221541	0.2011	5.35267	20.3922	NDUFA13;NDUFA6;NDUFS7
positive regulation of cellular catabolic process (GO:0031331)	6/141	0.0224393	0.202709	2.8685	10.8915	PFKFB1;CNOT7;NRDC;APOA4;GRSF1;ABCD1
steroid metabolic process (GO:0008202)	5/104	0.0226889	0.203983	3.25492	12.3227	AMACR;DHRS11;HSD17B4;LGMN;DHRS4
response to organonitrogen compound (GO:0010243)	3/40	0.0236832	0.211908	5.20774	19.4925	VCP;CCDC47;MEAK7
cellular response to peptide hormone stimulus (GO:0071375)	5/106	0.0243967	0.215324	3.19014	11.846	GOT1;EPRS1;TBC1D4;MARS1;LPIN1
regulation of cellular carbohydrate metabolic process (GO:0010675)	2/16	0.0247525	0.215324	9.15635	33.8678	BCKDK;MLYCD
regulation of oxidative phosphorylation (GO:0002082)	2/16	0.0247525	0.215324	9.15635	33.8678	VCP;ABCD1
neuron projection organization (GO:0106027)	2/16	0.0247525	0.215324	9.15635	33.8678	ABCD1;LGMN
nucleotide catabolic process (GO:0009166)	2/16	0.0247525	0.215324	9.15635	33.8678	VCP;GDA
protein localization to endoplasmic reticulum (GO:0070972)	2/16	0.0247525	0.215324	9.15635	33.8678	RYR2;HSPA5
carbohydrate catabolic process (GO:0016052)	3/41	0.025268	0.218796	5.07043	18.6501	PFKFB1;ALDOA;PFKM
calcium ion transmembrane import into cytosol (GO:0097553)	3/42	0.0269086	0.231933	4.94017	17.8602	RYR1;RYR2;RYR3
lipid transport (GO:0006869)	5/109	0.0271099	0.232601	3.09764	11.1758	ABCC4;ABCD3;ACSL1;APOA4;ABCD1
NIK/NF-kappaB signaling (GO:0038061)	4/74	0.0276463	0.236115	3.67607	13.1907	PSME4;CUL1;PSMF1;NFKB2
establishment of protein localization to endoplasmic reticulum (GO:0072599)	2/17	0.0277709	0.236115	8.54549	30.6251	RYR2;SRPRA
regulation of G2/M transition of mitotic cell cycle (GO:0010389)	6/149	0.0284279	0.240613	2.70692	9.63767	USP47;CDK4;PSME4;CUL1;PSMF1;PCNT
regulation of cytokine production involved in inflammatory response (GO:1900015)	3/43	0.0286048	0.241024	4.81642	17.1184	ALOX5;STAT3;ABCD1
actomyosin structure organization (GO:0031032)	4/76	0.0301062	0.252542	3.57359	12.5184	TJP1;EPB41;TCAP;MYLK3
intracellular protein transmembrane transport (GO:0065002)	3/44	0.0303565	0.25351	4.69871	16.4208	RTN2;HSPA5;PAM16
triglyceride biosynthetic process (GO:0019432)	2/18	0.0309286	0.25489	8.01099	27.8468	GPAM;LPIN1
phosphatidylinositol acyl-chain remodeling (GO:0036149)	2/18	0.0309286	0.25489	8.01099	27.8468	PLA2G4A;PLBD1
positive regulation of fatty acid metabolic process (GO:0045923)	2/18	0.0309286	0.25489	8.01099	27.8468	APOA4;MLYCD
regulation of DNA repair (GO:0006282)	3/45	0.0321634	0.263909	4.5866	15.7638	PCNA;TMEM161A;UBE2V2
postreplication repair (GO:0006301)	3/46	0.0340254	0.27362	4.47971	15.1443	VCP;PCNA;UBE2V2
pyroptosis (GO:0070269)	2/19	0.0342208	0.27362	7.53938	25.4448	GSDMA;APIP
fatty acid transmembrane transport (GO:1902001)	2/19	0.0342208	0.27362	7.53938	25.4448	ABCD3;ABCD1
response to ATP (GO:0033198)	2/19	0.0342208	0.27362	7.53938	25.4448	ABCC9;RYR3
leukotriene biosynthetic process (GO:0019370)	2/19	0.0342208	0.27362	7.53938	25.4448	ALOX5;PLA2G4A
positive regulation of actin cytoskeleton reorganization (GO:2000251)	2/19	0.0342208	0.27362	7.53938	25.4448	CDK5;TEK
cellular modified amino acid biosynthetic process (GO:0042398)	2/20	0.0376424	0.295942	7.12016	23.3514	CHAC2;OPLAH
regulation of fibroblast growth factor receptor signaling pathway (GO:0040036)	2/20	0.0376424	0.295942	7.12016	23.3514	GPC1;NPTN
endoplasmic reticulum calcium ion homeostasis (GO:0032469)	2/20	0.0376424	0.295942	7.12016	23.3514	CCDC47;ATP2A2
energy reserve metabolic process (GO:0006112)	2/20	0.0376424	0.295942	7.12016	23.3514	PYGM;PYGL
phosphatidic acid biosynthetic process (GO:0006654)	3/48	0.0379134	0.296831	4.28017	14.0067	GPAM;ACP6;PLA2G4A
regulation of lipoprotein lipase activity (GO:0051004)	2/21	0.0411888	0.316086	6.74507	21.514	LPL;APOA4
hydrogen peroxide catabolic process (GO:0042744)	2/21	0.0411888	0.316086	6.74507	21.514	PRDX1;APOA4
intracellular lipid transport (GO:0032365)	2/21	0.0411888	0.316086	6.74507	21.514	ABCD3;ABCD1
positive regulation of lipid storage (GO:0010884)	2/21	0.0411888	0.316086	6.74507	21.514	LPL;FITM2
regulation of cell cycle (GO:0051726)	9/296	0.041214	0.316086	2.02829	6.46818	TGM1;SDCBP;CDK5;CTBP1;CDK4;STAT3;NUDT6;MLF1;EIF4G2
phosphatidic acid metabolic process (GO:0046473)	3/50	0.0420181	0.320943	4.09762	12.988	GPAM;ACP6;PLA2G4A
error-free translesion synthesis (GO:0070987)	2/22	0.0448552	0.334456	6.40749	19.8909	VCP;PCNA
fatty-acyl-CoA metabolic process (GO:0035337)	2/22	0.0448552	0.334456	6.40749	19.8909	HSD17B4;FITM2
heme biosynthetic process (GO:0006783)	2/22	0.0448552	0.334456	6.40749	19.8909	ALAD;COX10
positive regulation of calcium ion transmembrane transporter activity (GO:1901021)	2/22	0.0448552	0.334456	6.40749	19.8909	RYR2;GSTM2
positive regulation of lipid catabolic process (GO:0050996)	2/22	0.0448552	0.334456	6.40749	19.8909	APOA4;ABCD1
positive regulation of peptidase activity (GO:0010952)	2/22	0.0448552	0.334456	6.40749	19.8909	NDUFA13;VCP
protein phosphorylation (GO:0006468)	13/496	0.0454297	0.337401	1.74657	5.39968	USP15;CAB39;CTBP1;TNNI3K;MYLK3;BCKDK;LIPE;GRK2;CDK5;CDK4;STK38L;COQ8A;TEK
regulation of release of sequestered calcium ion into cytosol (GO:0051279)	3/52	0.0463363	0.341435	3.92997	12.0722	GSTM2;DHRS7C;HRC
response to peptide hormone (GO:0043434)	3/52	0.0463363	0.341435	3.92997	12.0722	STAT3;MEAK7;KHK
phosphorylation (GO:0016310)	11/400	0.0473737	0.347715	1.83159	5.58579	BCKDK;LIPE;GRK2;CDK5;CTBP1;CDK4;STAT3;STK38L;COQ8A;TNNI3K;MYLK3
IRE1-mediated unfolded protein response (GO:0036498)	3/53	0.0485745	0.348815	3.85118	11.6485	ACADVL;HSPA5;SRPRA
diacylglycerol metabolic process (GO:0046339)	2/23	0.0486373	0.348815	6.10206	18.4488	LIPE;GPAM
regulation of peptidase activity (GO:0052547)	2/23	0.0486373	0.348815	6.10206	18.4488	NDUFA13;NRDC
glucose 6-phosphate metabolic process (GO:0051156)	2/23	0.0486373	0.348815	6.10206	18.4488	RPIA;RBKS
respiratory chain complex IV assembly (GO:0008535)	2/23	0.0486373	0.348815	6.10206	18.4488	COX10;COX20
vesicle transport along microtubule (GO:0047496)	2/23	0.0486373	0.348815	6.10206	18.4488	FYCO1;TRAK1
SCF-dependent proteasomal ubiquitin-dependent protein catabolic process (GO:0031146)	4/89	0.0491693	0.349958	3.02503	9.11287	CUL5;PSME4;CUL1;PSMF1
protein import (GO:0017038)	4/89	0.0491693	0.349958	3.02503	9.11287	ABCD3;PEX11B;STAT3;ABCD1
negative regulation of translation (GO:0017148)	4/90	0.050857	0.359304	2.98971	8.90555	CNOT7;EPRS1;SHMT1;CAPRIN1
regulation of cellular amino acid metabolic process (GO:0006521)	3/54	0.0508648	0.359304	3.77547	11.2456	BCKDK;PSME4;PSMF1
purine nucleotide metabolic process (GO:0006163)	2/24	0.0525305	0.360236	5.8244	17.1608	ADSL;GDA
canonical glycolysis (GO:0061621)	2/24	0.0525305	0.360236	5.8244	17.1608	ALDOA;PFKM
cardiac muscle cell development (GO:0055013)	2/24	0.0525305	0.360236	5.8244	17.1608	TCAP;MYLK3
glucose catabolic process to pyruvate (GO:0061718)	2/24	0.0525305	0.360236	5.8244	17.1608	ALDOA;PFKM
iron-sulfur cluster assembly (GO:0016226)	2/24	0.0525305	0.360236	5.8244	17.1608	GLRX3;CIAPIN1
leukotriene metabolic process (GO:0006691)	2/24	0.0525305	0.360236	5.8244	17.1608	ALOX5;PLA2G4A
phospholipid catabolic process (GO:0009395)	2/24	0.0525305	0.360236	5.8244	17.1608	PLA2G4A;PLBD1
porphyrin-containing compound biosynthetic process (GO:0006779)	2/24	0.0525305	0.360236	5.8244	17.1608	ALAD;COX10
pyruvate metabolic process (GO:0006090)	3/55	0.0532067	0.360922	3.70268	10.8621	PFKFB1;ALDOA;PFKM
triglyceride metabolic process (GO:0006641)	3/55	0.0532067	0.360922	3.70268	10.8621	GPAM;LPL;LPIN1
positive regulation of response to DNA damage stimulus (GO:2001022)	3/55	0.0532067	0.360922	3.70268	10.8621	PCNA;TMEM161A;EEF1E1
retinoid metabolic process (GO:0001523)	4/92	0.0543267	0.367194	2.92146	8.50945	GPC1;AKR1B1;LPL;APOA4
regulation of cardiac muscle cell action potential (GO:0098901)	2/25	0.0565305	0.372705	5.57088	16.005	RYR2;ATP2A2
energy derivation by oxidation of organic compounds (GO:0015980)	2/25	0.0565305	0.372705	5.57088	16.005	ACADVL;COX10
regulation of ryanodine-sensitive calcium-release channel activity (GO:0060314)	2/25	0.0565305	0.372705	5.57088	16.005	GSTM2;HRC
glycolytic process through glucose-6-phosphate (GO:0061620)	2/25	0.0565305	0.372705	5.57088	16.005	ALDOA;PFKM
response to hexose (GO:0009746)	2/25	0.0565305	0.372705	5.57088	16.005	LPL;KHK
ribosomal large subunit assembly (GO:0000027)	2/25	0.0565305	0.372705	5.57088	16.005	FASTKD2;RPL3L
peptide catabolic process (GO:0043171)	2/25	0.0565305	0.372705	5.57088	16.005	NPEPPS;CHAC2
icosanoid metabolic process (GO:0006690)	3/57	0.0580432	0.38134	3.56518	10.1485	PNPLA8;ALOX5;PLA2G4A
regulation of mitotic cell cycle (GO:0007346)	6/178	0.0585387	0.383255	2.24718	6.37765	SDCBP;PSME4;CUL1;SCRIB;PSMF1;LGMN
cellular iron ion homeostasis (GO:0006879)	3/58	0.0605367	0.384561	3.50018	9.81627	ATP6AP1;GLRX3;CUL1
negative regulation of proteolysis involved in cellular protein catabolic process (GO:1903051)	2/26	0.0606332	0.384561	5.33849	14.9633	ALAD;PSMF1
organelle fission (GO:0048285)	2/26	0.0606332	0.384561	5.33849	14.9633	MTFP1;PEX11B
organelle organization (GO:0006996)	11/420	0.0626677	0.384561	1.74022	4.82026	TMEM135;CLUH;ABCD3;DST;SAR1B;PEX11B;FITM2;LARP4;ANK1;ABCD1;NIPSNAP2
negative regulation of autophagy (GO:0010507)	3/59	0.0630797	0.384561	3.4375	9.49904	CTSA;STAT3;EIF4G2
acute inflammatory response (GO:0002526)	2/27	0.0648343	0.384561	5.12469	14.0207	MYLK3;MBL2
regulation of cardiac muscle cell contraction (GO:0086004)	2/27	0.0648343	0.384561	5.12469	14.0207	RYR2;ATP2A2
bile acid biosynthetic process (GO:0006699)	2/27	0.0648343	0.384561	5.12469	14.0207	AMACR;HSD17B4
monocarboxylic acid catabolic process (GO:0072329)	2/27	0.0648343	0.384561	5.12469	14.0207	NUDT19;LPIN1
presynaptic endocytosis (GO:0140238)	2/27	0.0648343	0.384561	5.12469	14.0207	CDK5;CANX
iron ion homeostasis (GO:0055072)	3/61	0.0683114	0.384561	3.31863	8.90613	ATP6AP1;GLRX3;CUL1
cytosolic calcium ion transport (GO:0060401)	2/28	0.06913	0.384561	4.92734	13.1647	RYR2;ATP2A2
regulation of reactive oxygen species biosynthetic process (GO:1903426)	2/28	0.06913	0.384561	4.92734	13.1647	ALOX5;ABCD1
glycerophospholipid catabolic process (GO:0046475)	2/28	0.06913	0.384561	4.92734	13.1647	PNPLA8;PLA2G4A
sarcomere organization (GO:0045214)	2/28	0.06913	0.384561	4.92734	13.1647	TCAP;MYLK3
positive regulation of cysteine-type endopeptidase activity (GO:2001056)	3/62	0.0709991	0.384561	3.26221	8.62884	NDUFA13;CTSD;LGMN
epithelial cell differentiation (GO:0030855)	4/101	0.0714756	0.384561	2.64918	6.9896	GSTK1;ACADVL;PCNA;SCRIB
aggrephagy (GO:0035973)	2/29	0.0735164	0.384561	4.7446	12.3846	DYNC1LI2;PCNT
regulation of fatty acid biosynthetic process (GO:0042304)	2/29	0.0735164	0.384561	4.7446	12.3846	ACADVL;APOA4
positive regulation of cell growth (GO:0030307)	4/102	0.0735333	0.384561	2.62201	6.8435	SDCBP;USP47;GOLGA4;EIF4G2
cell cycle G1/S phase transition (GO:0044843)	3/63	0.0737336	0.384561	3.20768	8.36337	CUL5;CDK4;CUL1
ADP transport (GO:0015866)	1/5	0.0749066	0.384561	15.9797	41.4116	SLC25A42
pyridine-containing compound metabolic process (GO:0072524)	1/5	0.0749066	0.384561	15.9797	41.4116	AOX1
pyrimidine deoxyribonucleotide biosynthetic process (GO:0009221)	1/5	0.0749066	0.384561	15.9797	41.4116	DUT
amino-acid betaine biosynthetic process (GO:0006578)	1/5	0.0749066	0.384561	15.9797	41.4116	SHMT1
AMP biosynthetic process (GO:0006167)	1/5	0.0749066	0.384561	15.9797	41.4116	ADSL
quinone catabolic process (GO:1901662)	1/5	0.0749066	0.384561	15.9797	41.4116	NQO2
regulation of antifungal innate immune response (GO:1905034)	1/5	0.0749066	0.384561	15.9797	41.4116	USP15
carnitine biosynthetic process (GO:0045329)	1/5	0.0749066	0.384561	15.9797	41.4116	SHMT1
regulation of circadian sleep/wake cycle (GO:0042749)	1/5	0.0749066	0.384561	15.9797	41.4116	PTGDS
cellular response to nutrient (GO:0031670)	1/5	0.0749066	0.384561	15.9797	41.4116	LPL
cellular response to salt stress (GO:0071472)	1/5	0.0749066	0.384561	15.9797	41.4116	AKR1B1
regulation of inflammatory response to wounding (GO:0106014)	1/5	0.0749066	0.384561	15.9797	41.4116	ALOX5
regulation of intestinal lipid absorption (GO:1904729)	1/5	0.0749066	0.384561	15.9797	41.4116	APOA4
cyclic-GMP-AMP transmembrane import across plasma membrane (GO:0140361)	1/5	0.0749066	0.384561	15.9797	41.4116	LRRC8C
disaccharide biosynthetic process (GO:0046351)	1/5	0.0749066	0.384561	15.9797	41.4116	FBP2
dopamine catabolic process (GO:0042420)	1/5	0.0749066	0.384561	15.9797	41.4116	MAOB
erythrose 4-phosphate/phosphoenolpyruvate family amino acid catabolic process (GO:1902222)	1/5	0.0749066	0.384561	15.9797	41.4116	QDPR
establishment of monopolar cell polarity (GO:0061162)	1/5	0.0749066	0.384561	15.9797	41.4116	SCRIB
establishment of T cell polarity (GO:0001768)	1/5	0.0749066	0.384561	15.9797	41.4116	SCRIB
regulation of sterol transport (GO:0032371)	1/5	0.0749066	0.384561	15.9797	41.4116	APOA4
regulation of synaptic vesicle recycling (GO:1903421)	1/5	0.0749066	0.384561	15.9797	41.4116	CDK5
fructose 2,6-bisphosphate metabolic process (GO:0006003)	1/5	0.0749066	0.384561	15.9797	41.4116	PFKFB1
fructose catabolic process (GO:0006001)	1/5	0.0749066	0.384561	15.9797	41.4116	KHK
fructose catabolic process to hydroxyacetone phosphate and glyceraldehyde-3-phosphate (GO:0061624)	1/5	0.0749066	0.384561	15.9797	41.4116	KHK
regulation of triglyceride metabolic process (GO:0090207)	1/5	0.0749066	0.384561	15.9797	41.4116	FITM2
glucuronate catabolic process (GO:0006064)	1/5	0.0749066	0.384561	15.9797	41.4116	SORD
glucuronate catabolic process to xylulose 5-phosphate (GO:0019640)	1/5	0.0749066	0.384561	15.9797	41.4116	SORD
glycerol biosynthetic process (GO:0006114)	1/5	0.0749066	0.384561	15.9797	41.4116	GOT1
glycerol ether metabolic process (GO:0006662)	1/5	0.0749066	0.384561	15.9797	41.4116	LIPE
rescue of stalled ribosome (GO:0072344)	1/5	0.0749066	0.384561	15.9797	41.4116	MTRES1
response to fructose (GO:0009750)	1/5	0.0749066	0.384561	15.9797	41.4116	KHK
Schwann cell differentiation (GO:0014037)	1/5	0.0749066	0.384561	15.9797	41.4116	GPC1
intracellular distribution of mitochondria (GO:0048312)	1/5	0.0749066	0.384561	15.9797	41.4116	CLUH
isocitrate metabolic process (GO:0006102)	1/5	0.0749066	0.384561	15.9797	41.4116	IDH1
L-methionine salvage from methylthioadenosine (GO:0019509)	1/5	0.0749066	0.384561	15.9797	41.4116	APIP
L-phenylalanine catabolic process (GO:0006559)	1/5	0.0749066	0.384561	15.9797	41.4116	QDPR
long-chain fatty acid catabolic process (GO:0042758)	1/5	0.0749066	0.384561	15.9797	41.4116	ABCD1
stress granule disassembly (GO:0035617)	1/5	0.0749066	0.384561	15.9797	41.4116	VCP
sulfide oxidation (GO:0019418)	1/5	0.0749066	0.384561	15.9797	41.4116	SQOR
sulfide oxidation, using sulfide:quinone oxidoreductase (GO:0070221)	1/5	0.0749066	0.384561	15.9797	41.4116	SQOR
mammary gland duct morphogenesis (GO:0060603)	1/5	0.0749066	0.384561	15.9797	41.4116	SCRIB
tRNA thio-modification (GO:0034227)	1/5	0.0749066	0.384561	15.9797	41.4116	TRMU
urate transport (GO:0015747)	1/5	0.0749066	0.384561	15.9797	41.4116	ABCC4
xylulose 5-phosphate biosynthetic process (GO:1901159)	1/5	0.0749066	0.384561	15.9797	41.4116	SORD
negative regulation of histone H4 acetylation (GO:0090241)	1/5	0.0749066	0.384561	15.9797	41.4116	CTBP1
negative regulation of IRE1-mediated unfolded protein response (GO:1903895)	1/5	0.0749066	0.384561	15.9797	41.4116	HSPA5
negative regulation of macrophage chemotaxis (GO:0010760)	1/5	0.0749066	0.384561	15.9797	41.4116	DDT
plus-end-directed vesicle transport along microtubule (GO:0072383)	1/5	0.0749066	0.384561	15.9797	41.4116	FYCO1
positive regulation of 3'-UTR-mediated mRNA stabilization (GO:1905870)	1/5	0.0749066	0.384561	15.9797	41.4116	LARP4B
positive regulation of amine transport (GO:0051954)	1/5	0.0749066	0.384561	15.9797	41.4116	GRK2
positive regulation of blood-brain barrier permeability (GO:1905605)	1/5	0.0749066	0.384561	15.9797	41.4116	TJP1
positive regulation of deoxyribonuclease activity (GO:0032077)	1/5	0.0749066	0.384561	15.9797	41.4116	PCNA
positive regulation of fibroblast growth factor receptor signaling pathway (GO:0045743)	1/5	0.0749066	0.384561	15.9797	41.4116	NPTN
positive regulation of metallopeptidase activity (GO:1905050)	1/5	0.0749066	0.384561	15.9797	41.4116	STAT3
positive regulation of non-motile cilium assembly (GO:1902857)	1/5	0.0749066	0.384561	15.9797	41.4116	SEPTIN7
positive regulation of protein localization to cell cortex (GO:1904778)	1/5	0.0749066	0.384561	15.9797	41.4116	EPB41
positive regulation of the force of heart contraction (GO:0098735)	1/5	0.0749066	0.384561	15.9797	41.4116	RYR2
prostaglandin transport (GO:0015732)	1/5	0.0749066	0.384561	15.9797	41.4116	ABCC4
regulation of protein localization to membrane (GO:1905475)	2/30	0.0779895	0.385807	4.57492	11.6714	CDK5;GPC1
Golgi to plasma membrane protein transport (GO:0043001)	2/30	0.0779895	0.385807	4.57492	11.6714	GOLGA4;PREPL
steroid biosynthetic process (GO:0006694)	3/65	0.079341	0.385807	3.10389	7.86526	DHRS11;AMACR;HSD17B4
mitochondrial translation (GO:0032543)	4/105	0.079885	0.385807	2.54374	6.42846	GFM1;FASTKD2;ERAL1;MRRF
cellular response to nutrient levels (GO:0031669)	3/66	0.0822125	0.385807	3.05447	7.63142	RIPOR1;MARS1;LPL
positive regulation of cell cycle (GO:0045787)	3/66	0.0822125	0.385807	3.05447	7.63142	TGM1;CDK4;LGMN
purine nucleoside bisphosphate metabolic process (GO:0034032)	2/31	0.0825458	0.385807	4.41694	11.0176	ACOT1;MLYCD
aminoglycan catabolic process (GO:0006026)	2/31	0.0825458	0.385807	4.41694	11.0176	GPC1;GNS
regulation of cellular component size (GO:0032535)	2/31	0.0825458	0.385807	4.41694	11.0176	LARS1;PEX11B
ribonucleoside bisphosphate metabolic process (GO:0033875)	2/31	0.0825458	0.385807	4.41694	11.0176	ACOT1;MLYCD
phosphatidylethanolamine metabolic process (GO:0046337)	2/31	0.0825458	0.385807	4.41694	11.0176	PNPLA8;LPIN1
response to calcium ion (GO:0051592)	4/107	0.0842661	0.385807	2.4941	6.16983	RYR1;RYR2;RYR3;LGMN
anion transmembrane transport (GO:0098656)	3/67	0.0851283	0.385807	3.00659	7.40701	LRRC8C;SLC25A42;SLC25A22
regulation of cell morphogenesis (GO:0022604)	2/32	0.0871815	0.385807	4.26949	10.4165	FITM2;LARP4
regulation of dendritic spine morphogenesis (GO:0061001)	2/32	0.0871815	0.385807	4.26949	10.4165	CDK5;CAPRIN1
regulation of intracellular protein transport (GO:0033157)	2/32	0.0871815	0.385807	4.26949	10.4165	RIPOR1;PCNT
establishment or maintenance of epithelial cell apical/basal polarity (GO:0045197)	2/32	0.0871815	0.385807	4.26949	10.4165	SCRIB;ANK1
regulation of transcription involved in G1/S transition of mitotic cell cycle (GO:0000083)	2/32	0.0871815	0.385807	4.26949	10.4165	PCNA;CDK5
response to amino acid (GO:0043200)	2/32	0.0871815	0.385807	4.26949	10.4165	LARS1;MEAK7
superoxide metabolic process (GO:0006801)	2/32	0.0871815	0.385807	4.26949	10.4165	PRDX1;APOA4
mitochondrial membrane organization (GO:0007006)	2/32	0.0871815	0.385807	4.26949	10.4165	APOO;MICOS13
protein localization to perinuclear region of cytoplasm (GO:1905719)	1/6	0.0892028	0.385807	12.7831	30.8948	HOOK1
protein-DNA covalent cross-linking repair (GO:0106300)	1/6	0.0892028	0.385807	12.7831	30.8948	VCP
adherens junction maintenance (GO:0034334)	1/6	0.0892028	0.385807	12.7831	30.8948	TJP1
pteridine-containing compound biosynthetic process (GO:0042559)	1/6	0.0892028	0.385807	12.7831	30.8948	QDPR
purine nucleobase biosynthetic process (GO:0009113)	1/6	0.0892028	0.385807	12.7831	30.8948	SHMT1
purine nucleobase transport (GO:0006863)	1/6	0.0892028	0.385807	12.7831	30.8948	VDAC3
radial glial cell differentiation (GO:0060019)	1/6	0.0892028	0.385807	12.7831	30.8948	STAT3
regulation of 3'-UTR-mediated mRNA stabilization (GO:1905868)	1/6	0.0892028	0.385807	12.7831	30.8948	LARP4B
aspartate metabolic process (GO:0006531)	1/6	0.0892028	0.385807	12.7831	30.8948	GOT1
regulation of digestive system process (GO:0044058)	1/6	0.0892028	0.385807	12.7831	30.8948	EPB41
cellular hyperosmotic response (GO:0071474)	1/6	0.0892028	0.385807	12.7831	30.8948	AKR1B1
regulation of extracellular exosome assembly (GO:1903551)	1/6	0.0892028	0.385807	12.7831	30.8948	SDCBP
regulation of glucagon secretion (GO:0070092)	1/6	0.0892028	0.385807	12.7831	30.8948	AIMP1
cellular response to magnesium ion (GO:0071286)	1/6	0.0892028	0.385807	12.7831	30.8948	RYR3
cellular triglyceride homeostasis (GO:0035356)	1/6	0.0892028	0.385807	12.7831	30.8948	FITM2
regulation of long-chain fatty acid import across plasma membrane (GO:0010746)	1/6	0.0892028	0.385807	12.7831	30.8948	ACSL1
regulation of non-motile cilium assembly (GO:1902855)	1/6	0.0892028	0.385807	12.7831	30.8948	SEPTIN7
embryonic camera-type eye development (GO:0031076)	1/6	0.0892028	0.385807	12.7831	30.8948	NES
regulation of relaxation of cardiac muscle (GO:1901897)	1/6	0.0892028	0.385807	12.7831	30.8948	HRC
erythrose 4-phosphate/phosphoenolpyruvate family amino acid metabolic process (GO:1902221)	1/6	0.0892028	0.385807	12.7831	30.8948	QDPR
establishment of lymphocyte polarity (GO:0001767)	1/6	0.0892028	0.385807	12.7831	30.8948	SCRIB
regulation of sarcomere organization (GO:0060297)	1/6	0.0892028	0.385807	12.7831	30.8948	MYLK3
galactose catabolic process (GO:0019388)	1/6	0.0892028	0.385807	12.7831	30.8948	GALM
glomerulus vasculature development (GO:0072012)	1/6	0.0892028	0.385807	12.7831	30.8948	TEK
glycerol-3-phosphate metabolic process (GO:0006072)	1/6	0.0892028	0.385807	12.7831	30.8948	GPAM
guanine nucleotide transmembrane transport (GO:1903790)	1/6	0.0892028	0.385807	12.7831	30.8948	LRRC8C
histamine metabolic process (GO:0001692)	1/6	0.0892028	0.385807	12.7831	30.8948	HNMT
hydrogen peroxide biosynthetic process (GO:0050665)	1/6	0.0892028	0.385807	12.7831	30.8948	MAOB
hydrogen sulfide metabolic process (GO:0070813)	1/6	0.0892028	0.385807	12.7831	30.8948	SQOR
SCF complex assembly (GO:0010265)	1/6	0.0892028	0.385807	12.7831	30.8948	CUL1
isoleucine metabolic process (GO:0006549)	1/6	0.0892028	0.385807	12.7831	30.8948	ACADSB
L-ornithine transmembrane transport (GO:1903352)	1/6	0.0892028	0.385807	12.7831	30.8948	SLC25A15
leukocyte chemotaxis involved in inflammatory response (GO:0002232)	1/6	0.0892028	0.385807	12.7831	30.8948	ALOX5
lipoxin metabolic process (GO:2001300)	1/6	0.0892028	0.385807	12.7831	30.8948	ALOX5
macromolecule biosynthetic process (GO:0009059)	1/6	0.0892028	0.385807	12.7831	30.8948	EIF4G2
T-helper 17 cell lineage commitment (GO:0072540)	1/6	0.0892028	0.385807	12.7831	30.8948	STAT3
mitochondrial ribosome assembly (GO:0061668)	1/6	0.0892028	0.385807	12.7831	30.8948	FASTKD2
valine metabolic process (GO:0006573)	1/6	0.0892028	0.385807	12.7831	30.8948	ALDH6A1
negative regulation of relaxation of muscle (GO:1901078)	1/6	0.0892028	0.385807	12.7831	30.8948	GRK2
neurotransmitter receptor transport, endosome to postsynaptic membrane (GO:0098887)	1/6	0.0892028	0.385807	12.7831	30.8948	SCRIB
pentose-phosphate shunt, non-oxidative branch (GO:0009052)	1/6	0.0892028	0.385807	12.7831	30.8948	RPIA
plus-end-directed organelle transport along microtubule (GO:0072386)	1/6	0.0892028	0.385807	12.7831	30.8948	FYCO1
positive regulation of autophagosome maturation (GO:1901098)	1/6	0.0892028	0.385807	12.7831	30.8948	FYCO1
positive regulation of cholesterol storage (GO:0010886)	1/6	0.0892028	0.385807	12.7831	30.8948	LPL
response to endoplasmic reticulum stress (GO:0034976)	4/110	0.0910533	0.385807	2.42314	5.80659	VCP;HSPA5;CCDC47;ATP2A2
cellular response to calcium ion (GO:0071277)	3/69	0.0910899	0.385807	2.91518	6.98451	RYR1;RYR3;LGMN
antigen processing and presentation of peptide antigen via MHC class I (GO:0002474)	2/33	0.0918933	0.385807	4.13155	9.86255	SAR1B;CANX
bile acid metabolic process (GO:0008206)	2/33	0.0918933	0.385807	4.13155	9.86255	AMACR;HSD17B4
lytic vacuole organization (GO:0080171)	2/33	0.0918933	0.385807	4.13155	9.86255	HOOK1;GAA
positive regulation of ATP metabolic process (GO:1903580)	2/33	0.0918933	0.385807	4.13155	9.86255	PFKFB1;VCP
primary alcohol metabolic process (GO:0034308)	2/33	0.0918933	0.385807	4.13155	9.86255	PECR;GPD2
carbohydrate homeostasis (GO:0033500)	3/70	0.0941343	0.385807	2.87152	6.78551	ALOX5;STAT3;PYGL
cellular response to light stimulus (GO:0071482)	3/70	0.0941343	0.385807	2.87152	6.78551	USP47;PCNA;TMEM161A
protein-containing complex subunit organization (GO:0043933)	4/112	0.095719	0.385807	2.37802	5.57964	EPRS1;TCAP;DARS1;SH3BGR
autophagosome maturation (GO:0097352)	2/34	0.0966775	0.385807	4.00224	9.35073	VCP;ATP2A2
epithelial tube morphogenesis (GO:0060562)	2/34	0.0966775	0.385807	4.00224	9.35073	RYR2;SCRIB
synaptic vesicle recycling (GO:0036465)	2/34	0.0966775	0.385807	4.00224	9.35073	CDK5;CANX
organelle disassembly (GO:1903008)	2/34	0.0966775	0.385807	4.00224	9.35073	VCP;MRRF
organic cyclic compound biosynthetic process (GO:1901362)	2/34	0.0966775	0.385807	4.00224	9.35073	DHRS11;ALOX5
cellular response to starvation (GO:0009267)	5/158	0.0987221	0.385807	2.10032	4.86317	RIPOR1;HSPA5;LARS1;MARS1;KPTN
sterol homeostasis (GO:0055092)	3/72	0.100347	0.385807	2.78801	6.40998	LPL;APOA4;ABCD1
acylglycerol catabolic process (GO:0046464)	2/35	0.101531	0.385807	3.88076	8.87682	LIPE;LPL
cellular response to amyloid-beta (GO:1904646)	2/35	0.101531	0.385807	3.88076	8.87682	CDK5;LGMN
regulation of lipid biosynthetic process (GO:0046890)	2/35	0.101531	0.385807	3.88076	8.87682	FITM2;APOA4
regulation of TORC1 signaling (GO:1903432)	2/35	0.101531	0.385807	3.88076	8.87682	LARS1;KPTN
negative regulation of T cell proliferation (GO:0042130)	2/35	0.101531	0.385807	3.88076	8.87682	ARG1;SCRIB
calcium ion transport (GO:0006816)	4/115	0.102924	0.385807	2.3134	5.26011	RYR1;RYR2;ATP2A2;RYR3
aspartate transmembrane transport (GO:0015810)	1/7	0.103279	0.385807	10.6521	24.1836	SLC25A22
astrocyte differentiation (GO:0048708)	1/7	0.103279	0.385807	10.6521	24.1836	STAT3
autophagosome membrane docking (GO:0016240)	1/7	0.103279	0.385807	10.6521	24.1836	ATP2A2
regulation of blood-brain barrier permeability (GO:1905603)	1/7	0.103279	0.385807	10.6521	24.1836	TJP1
regulation of cardiac muscle cell membrane potential (GO:0086036)	1/7	0.103279	0.385807	10.6521	24.1836	ATP2A2
cardiolipin acyl-chain remodeling (GO:0035965)	1/7	0.103279	0.385807	10.6521	24.1836	PLA2G4A
catecholamine catabolic process (GO:0042424)	1/7	0.103279	0.385807	10.6521	24.1836	MAOB
cellular hypotonic response (GO:0071476)	1/7	0.103279	0.385807	10.6521	24.1836	CAB39
cellular protein complex disassembly (GO:0043624)	1/7	0.103279	0.385807	10.6521	24.1836	APEH
cellular response to interleukin-18 (GO:0071351)	1/7	0.103279	0.385807	10.6521	24.1836	ALOX5
cellular response to platelet-derived growth factor stimulus (GO:0036120)	1/7	0.103279	0.385807	10.6521	24.1836	MARS1
regulation of miRNA mediated inhibition of translation (GO:1905616)	1/7	0.103279	0.385807	10.6521	24.1836	STAT3
definitive hemopoiesis (GO:0060216)	1/7	0.103279	0.385807	10.6521	24.1836	TEK
detection of muscle stretch (GO:0035995)	1/7	0.103279	0.385807	10.6521	24.1836	TCAP
endosome to lysosome transport via multivesicular body sorting pathway (GO:0032510)	1/7	0.103279	0.385807	10.6521	24.1836	VCP
glutathione catabolic process (GO:0006751)	1/7	0.103279	0.385807	10.6521	24.1836	CHAC2
glyceraldehyde-3-phosphate metabolic process (GO:0019682)	1/7	0.103279	0.385807	10.6521	24.1836	KHK
heart trabecula formation (GO:0060347)	1/7	0.103279	0.385807	10.6521	24.1836	TEK
response to increased oxygen levels (GO:0036296)	1/7	0.103279	0.385807	10.6521	24.1836	ATP6AP1
hypotonic response (GO:0006971)	1/7	0.103279	0.385807	10.6521	24.1836	CAB39
ribonucleoprotein complex disassembly (GO:0032988)	1/7	0.103279	0.385807	10.6521	24.1836	VCP
interleukin-18-mediated signaling pathway (GO:0035655)	1/7	0.103279	0.385807	10.6521	24.1836	ALOX5
L-methionine salvage (GO:0071267)	1/7	0.103279	0.385807	10.6521	24.1836	APIP
leukotriene transport (GO:0071716)	1/7	0.103279	0.385807	10.6521	24.1836	ABCC4
lipoxin biosynthetic process (GO:2001301)	1/7	0.103279	0.385807	10.6521	24.1836	ALOX5
substrate-dependent cell migration, cell extension (GO:0006930)	1/7	0.103279	0.385807	10.6521	24.1836	SDCBP
T-helper 17 cell differentiation (GO:0072539)	1/7	0.103279	0.385807	10.6521	24.1836	STAT3
tachykinin receptor signaling pathway (GO:0007217)	1/7	0.103279	0.385807	10.6521	24.1836	GRK2
mitochondrion-endoplasmic reticulum membrane tethering (GO:1990456)	1/7	0.103279	0.385807	10.6521	24.1836	ATP2A2
monoacylglycerol biosynthetic process (GO:0006640)	1/7	0.103279	0.385807	10.6521	24.1836	PLA2G4A
white fat cell differentiation (GO:0050872)	1/7	0.103279	0.385807	10.6521	24.1836	CTBP1
negative regulation of heart rate (GO:0010459)	1/7	0.103279	0.385807	10.6521	24.1836	RNLS
negative regulation of interferon-gamma-mediated signaling pathway (GO:0060336)	1/7	0.103279	0.385807	10.6521	24.1836	ARG1
negative regulation of response to interferon-gamma (GO:0060331)	1/7	0.103279	0.385807	10.6521	24.1836	ARG1
negative regulation of stress-activated protein kinase signaling cascade (GO:0070303)	1/7	0.103279	0.385807	10.6521	24.1836	QARS1
neurotransmitter receptor transport, endosome to plasma membrane (GO:0099639)	1/7	0.103279	0.385807	10.6521	24.1836	SCRIB
nucleobase biosynthetic process (GO:0046112)	1/7	0.103279	0.385807	10.6521	24.1836	SHMT1
oxygen transport (GO:0015671)	1/7	0.103279	0.385807	10.6521	24.1836	MB
pentose metabolic process (GO:0019321)	1/7	0.103279	0.385807	10.6521	24.1836	RPIA
photoreceptor cell differentiation (GO:0046530)	1/7	0.103279	0.385807	10.6521	24.1836	STAT3
positive regulation of blood circulation (GO:1903524)	1/7	0.103279	0.385807	10.6521	24.1836	HRC
positive regulation of catecholamine secretion (GO:0033605)	1/7	0.103279	0.385807	10.6521	24.1836	GRK2
positive regulation of chemokine (C-X-C motif) ligand 2 production (GO:2000343)	1/7	0.103279	0.385807	10.6521	24.1836	LPL
positive regulation of miRNA mediated inhibition of translation (GO:1905618)	1/7	0.103279	0.385807	10.6521	24.1836	STAT3
positive regulation of mitochondrial membrane potential (GO:0010918)	1/7	0.103279	0.385807	10.6521	24.1836	VCP
positive regulation of protein deubiquitination (GO:1903003)	1/7	0.103279	0.385807	10.6521	24.1836	VCP
positive regulation of unsaturated fatty acid biosynthetic process (GO:2001280)	1/7	0.103279	0.385807	10.6521	24.1836	ABCD1
positive regulation of voltage-gated calcium channel activity (GO:1901387)	1/7	0.103279	0.385807	10.6521	24.1836	NIPSNAP2
posttranslational protein targeting to membrane, translocation (GO:0031204)	1/7	0.103279	0.385807	10.6521	24.1836	HSPA5
establishment of protein localization to plasma membrane (GO:0061951)	2/36	0.10645	0.392339	3.76643	8.43709	GOLGA4;PREPL
acyl-CoA metabolic process (GO:0006637)	2/37	0.111432	0.392339	3.65863	8.02827	ACOT1;MLYCD
regulation of transport (GO:0051049)	2/37	0.111432	0.392339	3.65863	8.02827	CDK5;EPB41
skeletal muscle tissue development (GO:0007519)	2/37	0.111432	0.392339	3.65863	8.02827	RYR1;ACTA1
negative regulation of endothelial cell proliferation (GO:0001937)	2/37	0.111432	0.392339	3.65863	8.02827	AIMP1;ALOX5
phospholipid biosynthetic process (GO:0008654)	2/37	0.111432	0.392339	3.65863	8.02827	GPAM;FITM2
positive regulation of exocytosis (GO:0045921)	2/37	0.111432	0.392339	3.65863	8.02827	SDCBP;ATP6AP1
protein insertion into ER membrane (GO:0045048)	2/37	0.111432	0.392339	3.65863	8.02827	CCDC47;EMC1
positive regulation of growth (GO:0045927)	3/76	0.113244	0.392339	2.6347	5.73893	USP47;SDCBP;EIF4G2
cellular protein modification process (GO:0006464)	21/1025	0.115235	0.392339	1.35717	2.93254	CUL5;CTBP1;APLP2;CUL1;TNNI3K;MYLK3;KTN1;TGM1;BCKDK;LIPE;PDP2;GRK2;SDHAF2;CDK5;CDK4;PSME4;HRC;STK38L;PSMF1;AGA;COQ8A
cytoskeleton organization (GO:0007010)	4/120	0.115465	0.392339	2.21311	4.77765	DST;FITM2;LARP4;ANK1
regulation of cell communication (GO:0010646)	2/38	0.116474	0.392339	3.55682	7.64747	RYR2;GRK2
lysosome organization (GO:0007040)	2/38	0.116474	0.392339	3.55682	7.64747	HOOK1;GAA
synaptic vesicle endocytosis (GO:0048488)	2/38	0.116474	0.392339	3.55682	7.64747	CDK5;CANX
negative regulation of innate immune response (GO:0045824)	2/38	0.116474	0.392339	3.55682	7.64747	USP15;CNOT7
cellular response to UV (GO:0034644)	3/77	0.116563	0.392339	2.59897	5.58602	USP47;PCNA;TMEM161A
positive regulation of tumor necrosis factor production (GO:0032760)	3/77	0.116563	0.392339	2.59897	5.58602	DDT;STAT3;LPL
pyrimidine nucleobase catabolic process (GO:0006208)	1/8	0.117138	0.392339	9.12987	19.5781	ALDH6A1
regulation of acetyl-CoA biosynthetic process from pyruvate (GO:0010510)	1/8	0.117138	0.392339	9.12987	19.5781	PDP2
regulation of acyl-CoA biosynthetic process (GO:0050812)	1/8	0.117138	0.392339	9.12987	19.5781	PDP2
aspartate family amino acid biosynthetic process (GO:0009067)	1/8	0.117138	0.392339	9.12987	19.5781	GOT1
regulation of ATPase-coupled calcium transmembrane transporter activity (GO:1901894)	1/8	0.117138	0.392339	9.12987	19.5781	RYR2
benzene-containing compound metabolic process (GO:0042537)	1/8	0.117138	0.392339	9.12987	19.5781	KYAT3
regulation of cardiac muscle cell action potential involved in regulation of contraction (GO:0098909)	1/8	0.117138	0.392339	9.12987	19.5781	ATP2A2
regulation of chaperone-mediated autophagy (GO:1904714)	1/8	0.117138	0.392339	9.12987	19.5781	CTSA
cellular response to epinephrine stimulus (GO:0071872)	1/8	0.117138	0.392339	9.12987	19.5781	RYR2
cellular response to hepatocyte growth factor stimulus (GO:0035729)	1/8	0.117138	0.392339	9.12987	19.5781	LGMN
cellular response to interleukin-21 (GO:0098757)	1/8	0.117138	0.392339	9.12987	19.5781	STAT3
regulation of intestinal cholesterol absorption (GO:0030300)	1/8	0.117138	0.392339	9.12987	19.5781	APOA4
regulation of mitochondrial gene expression (GO:0062125)	1/8	0.117138	0.392339	9.12987	19.5781	MTRES1
diacylglycerol biosynthetic process (GO:0006651)	1/8	0.117138	0.392339	9.12987	19.5781	GPAM
regulation of osteoclast development (GO:2001204)	1/8	0.117138	0.392339	9.12987	19.5781	ATP6AP1
regulation of protein localization to cell cortex (GO:1904776)	1/8	0.117138	0.392339	9.12987	19.5781	EPB41
regulation of protein localization to chromatin (GO:1905634)	1/8	0.117138	0.392339	9.12987	19.5781	VCP
establishment of Golgi localization (GO:0051683)	1/8	0.117138	0.392339	9.12987	19.5781	RIPOR1
regulation of response to wounding (GO:1903034)	1/8	0.117138	0.392339	9.12987	19.5781	ALOX5
regulation of vascular wound healing (GO:0061043)	1/8	0.117138	0.392339	9.12987	19.5781	ALOX5
response to epinephrine (GO:0071871)	1/8	0.117138	0.392339	9.12987	19.5781	RYR2
response to hepatocyte growth factor (GO:0035728)	1/8	0.117138	0.392339	9.12987	19.5781	LGMN
response to hydroperoxide (GO:0033194)	1/8	0.117138	0.392339	9.12987	19.5781	APOA4
histidine catabolic process (GO:0006548)	1/8	0.117138	0.392339	9.12987	19.5781	HNMT
histidine metabolic process (GO:0006547)	1/8	0.117138	0.392339	9.12987	19.5781	HNMT
ribosome disassembly (GO:0032790)	1/8	0.117138	0.392339	9.12987	19.5781	MRRF
interleukin-21-mediated signaling pathway (GO:0038114)	1/8	0.117138	0.392339	9.12987	19.5781	STAT3
self proteolysis (GO:0097264)	1/8	0.117138	0.392339	9.12987	19.5781	LGMN
lipid import into cell (GO:0140354)	1/8	0.117138	0.392339	9.12987	19.5781	ACSL1
T-helper cell lineage commitment (GO:0002295)	1/8	0.117138	0.392339	9.12987	19.5781	STAT3
negative regulation of fatty acid oxidation (GO:0046322)	1/8	0.117138	0.392339	9.12987	19.5781	ACADVL
negative regulation of macrophage migration (GO:1905522)	1/8	0.117138	0.392339	9.12987	19.5781	DDT
negative regulation of muscle hypertrophy (GO:0014741)	1/8	0.117138	0.392339	9.12987	19.5781	GLRX3
negative regulation of potassium ion transmembrane transporter activity (GO:1901017)	1/8	0.117138	0.392339	9.12987	19.5781	CAB39
peptidyl-proline hydroxylation to 4-hydroxy-L-proline (GO:0018401)	1/8	0.117138	0.392339	9.12987	19.5781	P4HA1
platelet activating factor metabolic process (GO:0046469)	1/8	0.117138	0.392339	9.12987	19.5781	PLA2G4A
positive regulation of lipoprotein lipase activity (GO:0051006)	1/8	0.117138	0.392339	9.12987	19.5781	APOA4
positive regulation of ryanodine-sensitive calcium-release channel activity (GO:0060316)	1/8	0.117138	0.392339	9.12987	19.5781	GSTM2
positive regulation of triglyceride catabolic process (GO:0010898)	1/8	0.117138	0.392339	9.12987	19.5781	APOA4
postsynapse organization (GO:0099173)	1/8	0.117138	0.392339	9.12987	19.5781	LGMN
protein deglycosylation (GO:0006517)	1/8	0.117138	0.392339	9.12987	19.5781	AGA
protein transport (GO:0015031)	9/369	0.119825	0.400625	1.61092	3.41792	CTSA;GOLGA4;PREPL;ATP6AP1;TBC1D4;SAR1B;CANX;MIA2;SIL1
protein-containing complex assembly (GO:0065003)	7/267	0.121092	0.40154	1.73226	3.65715	EPRS1;SAR1B;CUL1;TCAP;APOA4;SH3BGR;DARS1
organophosphate biosynthetic process (GO:0090407)	2/39	0.121573	0.40154	3.46052	7.29215	GPAM;FITM2
positive regulation of intracellular transport (GO:0032388)	2/39	0.121573	0.40154	3.46052	7.29215	RIPOR1;PCNT
mRNA 3'-end processing (GO:0031124)	3/79	0.123308	0.40154	2.53031	5.29612	FIP1L1;MTPAP;GRSF1
positive regulation of cell migration (GO:0030335)	7/269	0.124531	0.40154	1.71886	3.58073	TJP1;PTP4A1;SDCBP;RIPOR1;HSPA5;SEMA4B;STAT3
fatty acid derivative biosynthetic process (GO:1901570)	2/40	0.126725	0.40154	3.36928	6.96005	BDH1;ALOX5
negative regulation of ERBB signaling pathway (GO:1901185)	2/40	0.126725	0.40154	3.36928	6.96005	EPN1;LGMN
glycerophospholipid metabolic process (GO:0006650)	3/80	0.126733	0.40154	2.49733	5.15865	ACP6;PLA2G4A;APOA4
skin development (GO:0043588)	3/80	0.126733	0.40154	2.49733	5.15865	RYR1;TGM1;FLG2
positive regulation of tumor necrosis factor superfamily cytokine production (GO:1903557)	3/81	0.130192	0.40154	2.46518	5.02588	DDT;STAT3;LPL
actin-mediated cell contraction (GO:0070252)	1/9	0.130784	0.40154	7.98823	16.2497	EPDR1
adult heart development (GO:0007512)	1/9	0.130784	0.40154	7.98823	16.2497	TCAP
associative learning (GO:0008306)	1/9	0.130784	0.40154	7.98823	16.2497	LGMN
ATF6-mediated unfolded protein response (GO:0036500)	1/9	0.130784	0.40154	7.98823	16.2497	HSPA5
bundle of His cell to Purkinje myocyte communication (GO:0086069)	1/9	0.130784	0.40154	7.98823	16.2497	TNNI3K
regulation of DNA-directed DNA polymerase activity (GO:1900262)	1/9	0.130784	0.40154	7.98823	16.2497	PCNA
cellular response to interleukin-9 (GO:0071355)	1/9	0.130784	0.40154	7.98823	16.2497	STAT3
cellular response to leptin stimulus (GO:0044320)	1/9	0.130784	0.40154	7.98823	16.2497	STAT3
regulation of histone H4 acetylation (GO:0090239)	1/9	0.130784	0.40154	7.98823	16.2497	CTBP1
regulation of PERK-mediated unfolded protein response (GO:1903897)	1/9	0.130784	0.40154	7.98823	16.2497	HSPA5
epithelial cell apoptotic process (GO:1904019)	1/9	0.130784	0.40154	7.98823	16.2497	RYR2
regulation of skeletal muscle cell differentiation (GO:2001014)	1/9	0.130784	0.40154	7.98823	16.2497	GPC1
fatty acid alpha-oxidation (GO:0001561)	1/9	0.130784	0.40154	7.98823	16.2497	PECR
galactose metabolic process (GO:0006012)	1/9	0.130784	0.40154	7.98823	16.2497	GALM
response to leptin (GO:0044321)	1/9	0.130784	0.40154	7.98823	16.2497	STAT3
response to magnesium ion (GO:0032026)	1/9	0.130784	0.40154	7.98823	16.2497	RYR3
icosanoid transport (GO:0071715)	1/9	0.130784	0.40154	7.98823	16.2497	ABCC4
inositol metabolic process (GO:0006020)	1/9	0.130784	0.40154	7.98823	16.2497	IMPA2
interleukin-23-mediated signaling pathway (GO:0038155)	1/9	0.130784	0.40154	7.98823	16.2497	STAT3
interleukin-9-mediated signaling pathway (GO:0038113)	1/9	0.130784	0.40154	7.98823	16.2497	STAT3
ketone body biosynthetic process (GO:0046951)	1/9	0.130784	0.40154	7.98823	16.2497	BDH1
kynurenine metabolic process (GO:0070189)	1/9	0.130784	0.40154	7.98823	16.2497	KYAT3
L-phenylalanine metabolic process (GO:0006558)	1/9	0.130784	0.40154	7.98823	16.2497	QDPR
maintenance of apical/basal cell polarity (GO:0035090)	1/9	0.130784	0.40154	7.98823	16.2497	ANK1
maintenance of epithelial cell apical/basal polarity (GO:0045199)	1/9	0.130784	0.40154	7.98823	16.2497	ANK1
tetrahydrofolate interconversion (GO:0035999)	1/9	0.130784	0.40154	7.98823	16.2497	SHMT1
neurotransmitter receptor transport to postsynaptic membrane (GO:0098969)	1/9	0.130784	0.40154	7.98823	16.2497	SCRIB
ornithine metabolic process (GO:0006591)	1/9	0.130784	0.40154	7.98823	16.2497	ARG1
peroxisomal transport (GO:0043574)	1/9	0.130784	0.40154	7.98823	16.2497	ABCD1
peroxisome fission (GO:0016559)	1/9	0.130784	0.40154	7.98823	16.2497	PEX11B
phosphatidylglycerol biosynthetic process (GO:0006655)	1/9	0.130784	0.40154	7.98823	16.2497	GPAM
positive regulation of ATP biosynthetic process (GO:2001171)	1/9	0.130784	0.40154	7.98823	16.2497	VCP
positive regulation of cell-cell adhesion mediated by cadherin (GO:2000049)	1/9	0.130784	0.40154	7.98823	16.2497	TJP1
positive regulation of cholesterol esterification (GO:0010873)	1/9	0.130784	0.40154	7.98823	16.2497	APOA4
positive regulation of DNA-directed DNA polymerase activity (GO:1900264)	1/9	0.130784	0.40154	7.98823	16.2497	PCNA
positive regulation of fatty acid beta-oxidation (GO:0032000)	1/9	0.130784	0.40154	7.98823	16.2497	ABCD1
positive regulation of ligase activity (GO:0051351)	1/9	0.130784	0.40154	7.98823	16.2497	AIMP2
positive regulation of membrane potential (GO:0045838)	1/9	0.130784	0.40154	7.98823	16.2497	VCP
positive regulation of triglyceride lipase activity (GO:0061365)	1/9	0.130784	0.40154	7.98823	16.2497	APOA4
protein hexamerization (GO:0034214)	1/9	0.130784	0.40154	7.98823	16.2497	LRRC8C
regulation of mitochondrial membrane potential (GO:0051881)	2/41	0.131928	0.404391	3.28272	6.64916	VCP;ABCD1
translesion synthesis (GO:0019985)	2/42	0.137179	0.410339	3.20049	6.35768	VCP;PCNA
positive regulation of macromolecule biosynthetic process (GO:0010557)	4/129	0.139609	0.410339	2.05283	4.04183	PCNA;NAMPT;LARP4B;LARP4
regulation of primary metabolic process (GO:0080090)	4/130	0.142409	0.410339	2.03643	3.96912	GPAM;OPA3;PSME4;PSMF1
positive regulation of canonical Wnt signaling pathway (GO:0090263)	4/130	0.142409	0.410339	2.03643	3.96912	USP47;VCP;PSME4;PSMF1
cellular response to glucose starvation (GO:0042149)	2/43	0.142475	0.410339	3.12227	6.08402	HSPA5;KPTN
DNA synthesis involved in DNA repair (GO:0000731)	2/43	0.142475	0.410339	3.12227	6.08402	VCP;PCNA
substantia nigra development (GO:0021762)	2/43	0.142475	0.410339	3.12227	6.08402	MAOB;HSPA5
myofibril assembly (GO:0030239)	2/43	0.142475	0.410339	3.12227	6.08402	TCAP;MYLK3
acetyl-CoA biosynthetic process (GO:0006085)	1/10	0.144219	0.410339	7.10029	13.7492	MLYCD
arachidonate transport (GO:1903963)	1/10	0.144219	0.410339	7.10029	13.7492	PNPLA8
arachidonic acid secretion (GO:0050482)	1/10	0.144219	0.410339	7.10029	13.7492	PNPLA8
arginine metabolic process (GO:0006525)	1/10	0.144219	0.410339	7.10029	13.7492	ARG1
aromatic amino acid family metabolic process (GO:0009072)	1/10	0.144219	0.410339	7.10029	13.7492	QDPR
cellular biogenic amine catabolic process (GO:0042402)	1/10	0.144219	0.410339	7.10029	13.7492	HNMT
regulation of endoplasmic reticulum unfolded protein response (GO:1900101)	1/10	0.144219	0.410339	7.10029	13.7492	HSPA5
regulation of epithelial cell apoptotic process (GO:1904035)	1/10	0.144219	0.410339	7.10029	13.7492	TEK
cellular response to leucine (GO:0071233)	1/10	0.144219	0.410339	7.10029	13.7492	LARS1
cellular response to leucine starvation (GO:1990253)	1/10	0.144219	0.410339	7.10029	13.7492	LARS1
cellular response to oxygen levels (GO:0071453)	1/10	0.144219	0.410339	7.10029	13.7492	ATP6AP1
regulation of high voltage-gated calcium channel activity (GO:1901841)	1/10	0.144219	0.410339	7.10029	13.7492	NIPSNAP2
chylomicron assembly (GO:0034378)	1/10	0.144219	0.410339	7.10029	13.7492	APOA4
complement activation, lectin pathway (GO:0001867)	1/10	0.144219	0.410339	7.10029	13.7492	MBL2
cytoplasmic pattern recognition receptor signaling pathway in response to virus (GO:0039528)	1/10	0.144219	0.410339	7.10029	13.7492	IRF3
dicarboxylic acid biosynthetic process (GO:0043650)	1/10	0.144219	0.410339	7.10029	13.7492	GOT1
regulation of receptor binding (GO:1900120)	1/10	0.144219	0.410339	7.10029	13.7492	ATP2A2
ether lipid biosynthetic process (GO:0008611)	1/10	0.144219	0.410339	7.10029	13.7492	PLA2G4A
response to leucine (GO:0043201)	1/10	0.144219	0.410339	7.10029	13.7492	LARS1
serine family amino acid catabolic process (GO:0009071)	1/10	0.144219	0.410339	7.10029	13.7492	SHMT1
L-glutamate transmembrane transport (GO:0015813)	1/10	0.144219	0.410339	7.10029	13.7492	SLC25A22
L-serine metabolic process (GO:0006563)	1/10	0.144219	0.410339	7.10029	13.7492	SHMT1
leptin-mediated signaling pathway (GO:0033210)	1/10	0.144219	0.410339	7.10029	13.7492	STAT3
lipid droplet formation (GO:0140042)	1/10	0.144219	0.410339	7.10029	13.7492	FITM2
long-chain fatty acid import into cell (GO:0044539)	1/10	0.144219	0.410339	7.10029	13.7492	ACSL1
myelin assembly (GO:0032288)	1/10	0.144219	0.410339	7.10029	13.7492	GPC1
myelin maintenance (GO:0043217)	1/10	0.144219	0.410339	7.10029	13.7492	ABCD1
negative regulation of glycolytic process (GO:0045820)	1/10	0.144219	0.410339	7.10029	13.7492	PFKFB1
negative regulation of peptidyl-lysine acetylation (GO:2000757)	1/10	0.144219	0.410339	7.10029	13.7492	CTBP1
negative regulation of purine nucleotide metabolic process (GO:1900543)	1/10	0.144219	0.410339	7.10029	13.7492	PFKFB1
negative regulation of receptor binding (GO:1900121)	1/10	0.144219	0.410339	7.10029	13.7492	ATP2A2
neuron projection maintenance (GO:1990535)	1/10	0.144219	0.410339	7.10029	13.7492	ABCD1
peptidyl-amino acid modification (GO:0018193)	1/10	0.144219	0.410339	7.10029	13.7492	FKBP10
positive regulation of cell activation (GO:0050867)	1/10	0.144219	0.410339	7.10029	13.7492	PLA2G4A
positive regulation of dendritic spine morphogenesis (GO:0061003)	1/10	0.144219	0.410339	7.10029	13.7492	CAPRIN1
positive regulation of receptor recycling (GO:0001921)	1/10	0.144219	0.410339	7.10029	13.7492	SCRIB
positive regulation of RIG-I signaling pathway (GO:1900246)	1/10	0.144219	0.410339	7.10029	13.7492	USP15
positive regulation of transcription of nucleolar large rRNA by RNA polymerase I (GO:1901838)	1/10	0.144219	0.410339	7.10029	13.7492	MARS1
protein insertion into ER membrane by stop-transfer membrane-anchor sequence (GO:0045050)	1/10	0.144219	0.410339	7.10029	13.7492	EMC1
positive regulation of protein catabolic process (GO:0045732)	3/85	0.14435	0.410339	2.34445	4.53772	NDUFA13;VCP;NRDC
response to amyloid-beta (GO:1904645)	2/44	0.147814	0.41935	3.04777	5.82674	CDK5;LGMN
glucose homeostasis (GO:0042593)	3/86	0.147967	0.41935	2.31609	4.42551	ALOX5;STAT3;PYGL
intracellular protein transport (GO:0006886)	8/336	0.150762	0.42073	1.569	2.96862	CTSA;RTN2;TBC1D4;SAR1B;STAT3;SRPRA;TRAK1;SIL1
ERAD pathway (GO:0036503)	3/87	0.151612	0.42073	2.2884	4.3169	VCP;HSPA5;CCDC47
negative regulation of angiogenesis (GO:0016525)	3/87	0.151612	0.42073	2.2884	4.3169	ALOX5;TEK;EPN1
metal ion transport (GO:0030001)	3/88	0.155286	0.42073	2.26136	4.21175	RYR1;RYR2;RYR3
purine nucleoside bisphosphate biosynthetic process (GO:0034033)	1/11	0.157447	0.42073	6.38994	11.8128	PANK4
regulation of biosynthetic process (GO:0009889)	1/11	0.157447	0.42073	6.38994	11.8128	ALOX5
axonal transport of mitochondrion (GO:0019896)	1/11	0.157447	0.42073	6.38994	11.8128	TRAK1
cell-cell junction maintenance (GO:0045217)	1/11	0.157447	0.42073	6.38994	11.8128	TJP1
cellular response to increased oxygen levels (GO:0036295)	1/11	0.157447	0.42073	6.38994	11.8128	ATP6AP1
coenzyme A biosynthetic process (GO:0015937)	1/11	0.157447	0.42073	6.38994	11.8128	PANK4
regulation of long-term neuronal synaptic plasticity (GO:0048169)	1/11	0.157447	0.42073	6.38994	11.8128	NPTN
cyclooxygenase pathway (GO:0019371)	1/11	0.157447	0.42073	6.38994	11.8128	PTGDS
regulation of mitochondrial depolarization (GO:0051900)	1/11	0.157447	0.42073	6.38994	11.8128	ABCD1
desensitization of G protein-coupled receptor signaling pathway (GO:0002029)	1/11	0.157447	0.42073	6.38994	11.8128	GRK2
regulation of pH (GO:0006885)	1/11	0.157447	0.42073	6.38994	11.8128	ATP6AP1
ER-associated misfolded protein catabolic process (GO:0071712)	1/11	0.157447	0.42073	6.38994	11.8128	VCP
establishment of endothelial intestinal barrier (GO:0090557)	1/11	0.157447	0.42073	6.38994	11.8128	TJP1
fatty acid homeostasis (GO:0055089)	1/11	0.157447	0.42073	6.38994	11.8128	ABCD1
glycerol metabolic process (GO:0006071)	1/11	0.157447	0.42073	6.38994	11.8128	GOT1
response to corticosteroid (GO:0031960)	1/11	0.157447	0.42073	6.38994	11.8128	GOT1
ribonucleoside bisphosphate biosynthetic process (GO:0034030)	1/11	0.157447	0.42073	6.38994	11.8128	PANK4
inositol phosphate dephosphorylation (GO:0046855)	1/11	0.157447	0.42073	6.38994	11.8128	IMPA2
ketone body metabolic process (GO:1902224)	1/11	0.157447	0.42073	6.38994	11.8128	BDH1
lipoprotein catabolic process (GO:0042159)	1/11	0.157447	0.42073	6.38994	11.8128	CTSD
synaptic vesicle transport (GO:0048489)	1/11	0.157447	0.42073	6.38994	11.8128	CDK5
tetrahydrobiopterin metabolic process (GO:0046146)	1/11	0.157447	0.42073	6.38994	11.8128	QDPR
tetrahydrofolate metabolic process (GO:0046653)	1/11	0.157447	0.42073	6.38994	11.8128	SHMT1
negative regulation of activated T cell proliferation (GO:0046007)	1/11	0.157447	0.42073	6.38994	11.8128	SCRIB
negative regulation of potassium ion transmembrane transport (GO:1901380)	1/11	0.157447	0.42073	6.38994	11.8128	CAB39
organophosphate catabolic process (GO:0046434)	1/11	0.157447	0.42073	6.38994	11.8128	PLBD1
peptidyl-proline hydroxylation (GO:0019511)	1/11	0.157447	0.42073	6.38994	11.8128	P4HA1
PERK-mediated unfolded protein response (GO:0036499)	1/11	0.157447	0.42073	6.38994	11.8128	HSPA5
phosphorylated carbohydrate dephosphorylation (GO:0046838)	1/11	0.157447	0.42073	6.38994	11.8128	IMPA2
positive regulation of bone resorption (GO:0045780)	1/11	0.157447	0.42073	6.38994	11.8128	ATP6AP1
positive regulation of cellular respiration (GO:1901857)	1/11	0.157447	0.42073	6.38994	11.8128	VCP
positive regulation of keratinocyte proliferation (GO:0010838)	1/11	0.157447	0.42073	6.38994	11.8128	TGM1
positive regulation of lipid localization (GO:1905954)	1/11	0.157447	0.42073	6.38994	11.8128	LPL
positive regulation of nitric-oxide synthase biosynthetic process (GO:0051770)	1/11	0.157447	0.42073	6.38994	11.8128	NAMPT
positive regulation of posttranscriptional gene silencing (GO:0060148)	1/11	0.157447	0.42073	6.38994	11.8128	STAT3
positive regulation of transcription from RNA polymerase II promoter in response to endoplasmic reticulum stress (GO:1990440)	1/11	0.157447	0.42073	6.38994	11.8128	HSPA5
proteolysis (GO:0006508)	7/287	0.157634	0.42073	1.60687	2.96866	CTSA;NPEPPS;PRSS1;RNPEP;APEH;CTSD;LGMN
regulation of cellular protein localization (GO:1903827)	2/46	0.15861	0.420759	2.90894	5.35626	VCP;GPC1
regulation of DNA metabolic process (GO:0051052)	2/46	0.15861	0.420759	2.90894	5.35626	UBE2V2;KPNA2
establishment of protein localization to extracellular region (GO:0035592)	2/46	0.15861	0.420759	2.90894	5.35626	CANX;MIA2
vesicle organization (GO:0016050)	2/46	0.15861	0.420759	2.90894	5.35626	SAR1B;HOOK1
regulation of cysteine-type endopeptidase activity involved in apoptotic process (GO:0043281)	3/89	0.158988	0.420759	2.23495	4.10991	USP47;NDUFA13;CTSD
positive regulation of inflammatory response (GO:0050729)	3/89	0.158988	0.420759	2.23495	4.10991	KARS1;DDT;LPL
purine ribonucleotide biosynthetic process (GO:0009152)	2/48	0.169546	0.420916	2.78218	4.93735	PANK4;ADSL
base-excision repair (GO:0006284)	2/48	0.169546	0.420916	2.78218	4.93735	USP47;PCNA
Golgi to plasma membrane transport (GO:0006893)	2/48	0.169546	0.420916	2.78218	4.93735	GOLGA4;PREPL
myelination (GO:0042552)	2/48	0.169546	0.420916	2.78218	4.93735	GPC1;ABCD1
positive regulation of DNA repair (GO:0045739)	2/48	0.169546	0.420916	2.78218	4.93735	PCNA;TMEM161A
regulation of endothelial cell proliferation (GO:0001936)	3/92	0.170252	0.420916	2.15929	3.82297	AIMP1;ALOX5;TEK
positive regulation of cellular component biogenesis (GO:0044089)	3/92	0.170252	0.420916	2.15929	3.82297	SDCBP;VCP;SYNPO2
adipose tissue development (GO:0060612)	1/12	0.170472	0.420916	5.80874	10.2767	NAMPT
purine nucleoside monophosphate biosynthetic process (GO:0009127)	1/12	0.170472	0.420916	5.80874	10.2767	ADSL
purine nucleotide biosynthetic process (GO:0006164)	1/12	0.170472	0.420916	5.80874	10.2767	ADSL
pyrimidine nucleobase metabolic process (GO:0006206)	1/12	0.170472	0.420916	5.80874	10.2767	ALDH6A1
ATP transport (GO:0015867)	1/12	0.170472	0.420916	5.80874	10.2767	SLC25A42
regulation of cell communication by electrical coupling involved in cardiac conduction (GO:1901844)	1/12	0.170472	0.420916	5.80874	10.2767	HRC
carboxylic acid catabolic process (GO:0046395)	1/12	0.170472	0.420916	5.80874	10.2767	BCKDK
regulation of cholesterol esterification (GO:0010872)	1/12	0.170472	0.420916	5.80874	10.2767	APOA4
carnitine metabolic process (GO:0009437)	1/12	0.170472	0.420916	5.80874	10.2767	SHMT1
cellular response to growth hormone stimulus (GO:0071378)	1/12	0.170472	0.420916	5.80874	10.2767	STAT3
regulation of feeding behavior (GO:0060259)	1/12	0.170472	0.420916	5.80874	10.2767	STAT3
regulation of glycogen metabolic process (GO:0070873)	1/12	0.170472	0.420916	5.80874	10.2767	KHK
energy coupled proton transport, down electrochemical gradient (GO:0015985)	1/12	0.170472	0.420916	5.80874	10.2767	ATP5MG
regulation of sequestering of calcium ion (GO:0051282)	1/12	0.170472	0.420916	5.80874	10.2767	RYR2
eye photoreceptor cell differentiation (GO:0001754)	1/12	0.170472	0.420916	5.80874	10.2767	STAT3
gas transport (GO:0015669)	1/12	0.170472	0.420916	5.80874	10.2767	MB
regulation of triglyceride catabolic process (GO:0010896)	1/12	0.170472	0.420916	5.80874	10.2767	APOA4
regulation of ventricular cardiac muscle cell action potential (GO:0098911)	1/12	0.170472	0.420916	5.80874	10.2767	RYR2
glycine metabolic process (GO:0006544)	1/12	0.170472	0.420916	5.80874	10.2767	SHMT1
Golgi localization (GO:0051645)	1/12	0.170472	0.420916	5.80874	10.2767	RIPOR1
hemidesmosome assembly (GO:0031581)	1/12	0.170472	0.420916	5.80874	10.2767	DST
homocysteine metabolic process (GO:0050667)	1/12	0.170472	0.420916	5.80874	10.2767	MMUT
inorganic ion transmembrane transport (GO:0098660)	1/12	0.170472	0.420916	5.80874	10.2767	ABCC9
inositol phosphate catabolic process (GO:0071545)	1/12	0.170472	0.420916	5.80874	10.2767	IMPA2
keratan sulfate catabolic process (GO:0042340)	1/12	0.170472	0.420916	5.80874	10.2767	GNS
maintenance of protein localization in endoplasmic reticulum (GO:0035437)	1/12	0.170472	0.420916	5.80874	10.2767	HSPA5
tricarboxylic acid metabolic process (GO:0072350)	1/12	0.170472	0.420916	5.80874	10.2767	IDH1
mitotic nuclear membrane disassembly (GO:0007077)	1/12	0.170472	0.420916	5.80874	10.2767	LPIN1
morphogenesis of a polarized epithelium (GO:0001738)	1/12	0.170472	0.420916	5.80874	10.2767	SCRIB
negative regulation of amyloid fibril formation (GO:1905907)	1/12	0.170472	0.420916	5.80874	10.2767	VBP1
negative regulation of cardiac muscle hypertrophy (GO:0010614)	1/12	0.170472	0.420916	5.80874	10.2767	GLRX3
negative regulation of fatty acid biosynthetic process (GO:0045717)	1/12	0.170472	0.420916	5.80874	10.2767	ACADVL
negative regulation of histone acetylation (GO:0035067)	1/12	0.170472	0.420916	5.80874	10.2767	CTBP1
negative regulation of leukocyte chemotaxis (GO:0002689)	1/12	0.170472	0.420916	5.80874	10.2767	DDT
negative regulation of production of miRNAs involved in gene silencing by miRNA (GO:1903799)	1/12	0.170472	0.420916	5.80874	10.2767	STAT3
negative regulation of receptor internalization (GO:0002091)	1/12	0.170472	0.420916	5.80874	10.2767	SDCBP
negative regulation of release of sequestered calcium ion into cytosol (GO:0051280)	1/12	0.170472	0.420916	5.80874	10.2767	GSTM2
negative regulation of ryanodine-sensitive calcium-release channel activity (GO:0060315)	1/12	0.170472	0.420916	5.80874	10.2767	GSTM2
phospholipid efflux (GO:0033700)	1/12	0.170472	0.420916	5.80874	10.2767	APOA4
positive regulation of cellular senescence (GO:2000774)	1/12	0.170472	0.420916	5.80874	10.2767	EEF1E1
positive regulation of protein depolymerization (GO:1901881)	1/12	0.170472	0.420916	5.80874	10.2767	NES
positive regulation of vascular permeability (GO:0043117)	1/12	0.170472	0.420916	5.80874	10.2767	TJP1
posttranslational protein targeting to endoplasmic reticulum membrane (GO:0006620)	1/12	0.170472	0.420916	5.80874	10.2767	HSPA5
protein insertion into mitochondrial inner membrane (GO:0045039)	1/12	0.170472	0.420916	5.80874	10.2767	NDUFA13
response to glucose (GO:0009749)	2/49	0.175061	0.429979	2.72285	4.74489	LPL;KHK
secondary alcohol metabolic process (GO:1902652)	2/49	0.175061	0.429979	2.72285	4.74489	IDH1;APOA4
interleukin-1-mediated signaling pathway (GO:0070498)	3/94	0.177885	0.429979	2.11161	3.64595	PSME4;CUL1;PSMF1
ribosome assembly (GO:0042255)	2/50	0.180605	0.429979	2.66599	4.56269	ERAL1;RPL3L
organic hydroxy compound biosynthetic process (GO:1901617)	2/50	0.180605	0.429979	2.66599	4.56269	AMACR;HSD17B4
regulation of cell cycle phase transition (GO:1901987)	3/95	0.181737	0.429979	2.08855	3.56139	PSME4;CUL1;PSMF1
pteridine-containing compound metabolic process (GO:0042558)	1/13	0.183296	0.429979	5.3244	9.03367	QDPR
purine nucleotide catabolic process (GO:0006195)	1/13	0.183296	0.429979	5.3244	9.03367	GDA
purine-containing compound catabolic process (GO:0072523)	1/13	0.183296	0.429979	5.3244	9.03367	GDA
purine-containing compound salvage (GO:0043101)	1/13	0.183296	0.429979	5.3244	9.03367	DGUOK
pyrimidine deoxyribonucleotide catabolic process (GO:0009223)	1/13	0.183296	0.429979	5.3244	9.03367	DUT
AMP metabolic process (GO:0046033)	1/13	0.183296	0.429979	5.3244	9.03367	ADSL
regulation of autophagosome maturation (GO:1901096)	1/13	0.183296	0.429979	5.3244	9.03367	FYCO1
regulation of cell communication by electrical coupling (GO:0010649)	1/13	0.183296	0.429979	5.3244	9.03367	HRC
cardiac cell development (GO:0055006)	1/13	0.183296	0.429979	5.3244	9.03367	TCAP
regulation of chemokine (C-X-C motif) ligand 2 production (GO:2000341)	1/13	0.183296	0.429979	5.3244	9.03367	LPL
cellular biogenic amine metabolic process (GO:0006576)	1/13	0.183296	0.429979	5.3244	9.03367	HNMT
cellular response to interleukin-15 (GO:0071350)	1/13	0.183296	0.429979	5.3244	9.03367	STAT3
detection of calcium ion (GO:0005513)	1/13	0.183296	0.429979	5.3244	9.03367	RYR2
regulation of protein exit from endoplasmic reticulum (GO:0070861)	1/13	0.183296	0.429979	5.3244	9.03367	SAR1B
fatty acid elongation (GO:0030497)	1/13	0.183296	0.429979	5.3244	9.03367	ABCD1
relaxation of cardiac muscle (GO:0055119)	1/13	0.183296	0.429979	5.3244	9.03367	GSTM2
high-density lipoprotein particle assembly (GO:0034380)	1/13	0.183296	0.429979	5.3244	9.03367	APOA4
interleukin-15-mediated signaling pathway (GO:0035723)	1/13	0.183296	0.429979	5.3244	9.03367	STAT3
lipid oxidation (GO:0034440)	1/13	0.183296	0.429979	5.3244	9.03367	ALOX5
synaptic vesicle localization (GO:0097479)	1/13	0.183296	0.429979	5.3244	9.03367	CDK5
very long-chain fatty acid biosynthetic process (GO:0042761)	1/13	0.183296	0.429979	5.3244	9.03367	TECRL
negative regulation of endoplasmic reticulum unfolded protein response (GO:1900102)	1/13	0.183296	0.429979	5.3244	9.03367	HSPA5
negative regulation of potassium ion transport (GO:0043267)	1/13	0.183296	0.429979	5.3244	9.03367	CAB39
negative regulation of reactive oxygen species biosynthetic process (GO:1903427)	1/13	0.183296	0.429979	5.3244	9.03367	ABCD1
pathway-restricted SMAD protein phosphorylation (GO:0060389)	1/13	0.183296	0.429979	5.3244	9.03367	USP15
positive regulation of cell aging (GO:0090343)	1/13	0.183296	0.429979	5.3244	9.03367	EEF1E1
positive regulation of histone deacetylation (GO:0031065)	1/13	0.183296	0.429979	5.3244	9.03367	CTBP1
positive regulation of mRNA metabolic process (GO:1903313)	1/13	0.183296	0.429979	5.3244	9.03367	CNOT7
positive regulation of nuclear-transcribed mRNA poly(A) tail shortening (GO:0060213)	1/13	0.183296	0.429979	5.3244	9.03367	CNOT7
positive regulation of protein exit from endoplasmic reticulum (GO:0070863)	1/13	0.183296	0.429979	5.3244	9.03367	SAR1B
positive regulation of purine nucleotide biosynthetic process (GO:1900373)	1/13	0.183296	0.429979	5.3244	9.03367	VCP
positive regulation of ruffle assembly (GO:1900029)	1/13	0.183296	0.429979	5.3244	9.03367	FAM98A
positive regulation of steroid metabolic process (GO:0045940)	1/13	0.183296	0.429979	5.3244	9.03367	APOA4
pre-mRNA cleavage required for polyadenylation (GO:0098789)	1/13	0.183296	0.429979	5.3244	9.03367	FIP1L1
cellular transition metal ion homeostasis (GO:0046916)	3/96	0.185611	0.434325	2.06599	3.47934	ATP6AP1;GLRX3;CUL1
translational termination (GO:0006415)	3/96	0.185611	0.434325	2.06599	3.47934	ERAL1;APEH;MRRF
regulation of cellular amine metabolic process (GO:0033238)	2/51	0.186174	0.435102	2.61145	4.39003	PSME4;PSMF1
calcium ion homeostasis (GO:0055074)	3/97	0.189507	0.437425	2.04391	3.3997	RYR2;NPTN;ATP2A2
amide biosynthetic process (GO:0043604)	2/52	0.191768	0.437425	2.55909	4.22626	SLC25A15;ARG1
protein localization to vacuole (GO:0072665)	1/14	0.195922	0.437425	4.91459	8.01096	KPTN
protein maturation by iron-sulfur cluster transfer (GO:0097428)	1/14	0.195922	0.437425	4.91459	8.01096	GLRX3
activation of cysteine-type endopeptidase activity (GO:0097202)	1/14	0.195922	0.437425	4.91459	8.01096	LGMN
quinone biosynthetic process (GO:1901663)	1/14	0.195922	0.437425	4.91459	8.01096	COQ8A
C4-dicarboxylate transport (GO:0015740)	1/14	0.195922	0.437425	4.91459	8.01096	SLC25A22
cardiac left ventricle morphogenesis (GO:0003214)	1/14	0.195922	0.437425	4.91459	8.01096	RYR2
regulation of fatty acid beta-oxidation (GO:0031998)	1/14	0.195922	0.437425	4.91459	8.01096	ABCD1
cellular response to low-density lipoprotein particle stimulus (GO:0071404)	1/14	0.195922	0.437425	4.91459	8.01096	LPL
regulation of histone deacetylation (GO:0031063)	1/14	0.195922	0.437425	4.91459	8.01096	CTBP1
regulation of IRE1-mediated unfolded protein response (GO:1903894)	1/14	0.195922	0.437425	4.91459	8.01096	HSPA5
regulation of lipase activity (GO:0060191)	1/14	0.195922	0.437425	4.91459	8.01096	LPL
dicarboxylic acid catabolic process (GO:0043649)	1/14	0.195922	0.437425	4.91459	8.01096	GOT1
regulation of nitric-oxide synthase biosynthetic process (GO:0051769)	1/14	0.195922	0.437425	4.91459	8.01096	NAMPT
regulation of response to endoplasmic reticulum stress (GO:1905897)	1/14	0.195922	0.437425	4.91459	8.01096	ALOX5
ether lipid metabolic process (GO:0046485)	1/14	0.195922	0.437425	4.91459	8.01096	LIPE
regulation of transcription of nucleolar large rRNA by RNA polymerase I (GO:1901836)	1/14	0.195922	0.437425	4.91459	8.01096	MARS1
relaxation of muscle (GO:0090075)	1/14	0.195922	0.437425	4.91459	8.01096	GSTM2
growth hormone receptor signaling pathway via JAK-STAT (GO:0060397)	1/14	0.195922	0.437425	4.91459	8.01096	STAT3
response to X-ray (GO:0010165)	1/14	0.195922	0.437425	4.91459	8.01096	IKBIP
ribonucleoside monophosphate biosynthetic process (GO:0009156)	1/14	0.195922	0.437425	4.91459	8.01096	ADSL
smooth muscle contraction (GO:0006939)	1/14	0.195922	0.437425	4.91459	8.01096	SMTN
substrate-dependent cell migration (GO:0006929)	1/14	0.195922	0.437425	4.91459	8.01096	SDCBP
tRNA wobble uridine modification (GO:0002098)	1/14	0.195922	0.437425	4.91459	8.01096	TRMU
monoacylglycerol metabolic process (GO:0046462)	1/14	0.195922	0.437425	4.91459	8.01096	PLA2G4A
mRNA cleavage involved in mRNA processing (GO:0098787)	1/14	0.195922	0.437425	4.91459	8.01096	FIP1L1
ncRNA transcription (GO:0098781)	1/14	0.195922	0.437425	4.91459	8.01096	MARS1
negative regulation of fibroblast growth factor receptor signaling pathway (GO:0040037)	1/14	0.195922	0.437425	4.91459	8.01096	GPC1
negative regulation of TORC1 signaling (GO:1904262)	1/14	0.195922	0.437425	4.91459	8.01096	KPTN
nuclear membrane disassembly (GO:0051081)	1/14	0.195922	0.437425	4.91459	8.01096	LPIN1
polarized epithelial cell differentiation (GO:0030859)	1/14	0.195922	0.437425	4.91459	8.01096	SCRIB
positive regulation of long-term synaptic potentiation (GO:1900273)	1/14	0.195922	0.437425	4.91459	8.01096	LGMN
positive regulation of mitochondrial translation (GO:0070131)	1/14	0.195922	0.437425	4.91459	8.01096	FASTKD2
positive regulation of protein deacetylation (GO:0090312)	1/14	0.195922	0.437425	4.91459	8.01096	CTBP1
positive regulation of protein-containing complex disassembly (GO:0043243)	1/14	0.195922	0.437425	4.91459	8.01096	FYCO1
positive regulation of transmembrane transport (GO:0034764)	1/14	0.195922	0.437425	4.91459	8.01096	ACSL1
regulation of cytosolic calcium ion concentration (GO:0051480)	4/148	0.196248	0.437425	1.78024	2.8989	RYR1;RYR2;HRC;NPTN
positive regulation of intracellular protein transport (GO:0090316)	4/148	0.196248	0.437425	1.78024	2.8989	NPEPPS;RIPOR1;SAR1B;PCNT
response to UV (GO:0009411)	3/99	0.19736	0.438915	2.00112	3.24728	USP47;TMEM161A;PCNA
heart morphogenesis (GO:0003007)	2/53	0.197383	0.438915	2.50878	4.07077	RYR2;TCAP
positive regulation of translation (GO:0045727)	3/100	0.201316	0.444342	1.98039	3.17433	FASTKD2;LARP4B;LARP4
cytoplasmic microtubule organization (GO:0031122)	2/54	0.203019	0.444342	2.46041	3.92302	DST;HOOK1
regulation of proteasomal protein catabolic process (GO:0061136)	2/54	0.203019	0.444342	2.46041	3.92302	ALAD;PSMF1
glycosaminoglycan metabolic process (GO:0030203)	2/54	0.203019	0.444342	2.46041	3.92302	GPC1;GNS
acute-phase response (GO:0006953)	1/15	0.208354	0.444342	4.56331	7.15763	MBL2
regulation of amyloid fibril formation (GO:1905906)	1/15	0.208354	0.444342	4.56331	7.15763	VBP1
C21-steroid hormone biosynthetic process (GO:0006700)	1/15	0.208354	0.444342	4.56331	7.15763	AKR1B1
regulation of endothelial cell chemotaxis (GO:2001026)	1/15	0.208354	0.444342	4.56331	7.15763	LGMN
cellular response to arsenic-containing substance (GO:0071243)	1/15	0.208354	0.444342	4.56331	7.15763	VCP
cellular response to ATP (GO:0071318)	1/15	0.208354	0.444342	4.56331	7.15763	RYR3
regulation of establishment of protein localization (GO:0070201)	1/15	0.208354	0.444342	4.56331	7.15763	CTSD
regulation of nuclear-transcribed mRNA catabolic process, deadenylation-dependent decay (GO:1900151)	1/15	0.208354	0.444342	4.56331	7.15763	CNOT7
regulation of nuclear-transcribed mRNA poly(A) tail shortening (GO:0060211)	1/15	0.208354	0.444342	4.56331	7.15763	CNOT7
endoplasmic reticulum to cytosol transport (GO:1903513)	1/15	0.208354	0.444342	4.56331	7.15763	VCP
establishment of apical/basal cell polarity (GO:0035089)	1/15	0.208354	0.444342	4.56331	7.15763	SCRIB
regulation of triglyceride biosynthetic process (GO:0010866)	1/15	0.208354	0.444342	4.56331	7.15763	FITM2
response to acidic pH (GO:0010447)	1/15	0.208354	0.444342	4.56331	7.15763	LGMN
heterocycle biosynthetic process (GO:0018130)	1/15	0.208354	0.444342	4.56331	7.15763	ALOX5
histone mRNA catabolic process (GO:0071044)	1/15	0.208354	0.444342	4.56331	7.15763	MTPAP
integrated stress response signaling (GO:0140467)	1/15	0.208354	0.444342	4.56331	7.15763	HSPA5
lipoxygenase pathway (GO:0019372)	1/15	0.208354	0.444342	4.56331	7.15763	ALOX5
mammary gland epithelium development (GO:0061180)	1/15	0.208354	0.444342	4.56331	7.15763	SCRIB
ubiquinone biosynthetic process (GO:0006744)	1/15	0.208354	0.444342	4.56331	7.15763	COQ8A
ubiquinone metabolic process (GO:0006743)	1/15	0.208354	0.444342	4.56331	7.15763	COQ8A
vitamin D metabolic process (GO:0042359)	1/15	0.208354	0.444342	4.56331	7.15763	LGMN
negative regulation of blood pressure (GO:0045776)	1/15	0.208354	0.444342	4.56331	7.15763	RNLS
phosphatidylethanolamine biosynthetic process (GO:0006646)	1/15	0.208354	0.444342	4.56331	7.15763	LPIN1
positive regulation of DNA damage response, signal transduction by p53 class mediator (GO:0043517)	1/15	0.208354	0.444342	4.56331	7.15763	EEF1E1
positive regulation of endothelial cell chemotaxis (GO:2001028)	1/15	0.208354	0.444342	4.56331	7.15763	LGMN
positive regulation of exosomal secretion (GO:1903543)	1/15	0.208354	0.444342	4.56331	7.15763	SDCBP
positive regulation of membrane protein ectodomain proteolysis (GO:0051044)	1/15	0.208354	0.444342	4.56331	7.15763	NRDC
positive regulation of nuclear-transcribed mRNA catabolic process, deadenylation-dependent decay (GO:1900153)	1/15	0.208354	0.444342	4.56331	7.15763	CNOT7
positive regulation of osteoclast differentiation (GO:0045672)	1/15	0.208354	0.444342	4.56331	7.15763	ATP6AP1
positive regulation of pattern recognition receptor signaling pathway (GO:0062208)	1/15	0.208354	0.444342	4.56331	7.15763	USP15
positive regulation of sprouting angiogenesis (GO:1903672)	1/15	0.208354	0.444342	4.56331	7.15763	TJP1
protein targeting to mitochondrion (GO:0006626)	2/55	0.208672	0.444342	2.41387	3.78251	NDUFA13;PAM16
negative regulation of cytokine-mediated signaling pathway (GO:0001960)	2/55	0.208672	0.444342	2.41387	3.78251	CNOT7;ARG1
actin filament organization (GO:0007015)	4/152	0.208979	0.444342	1.73177	2.71112	ACTA1;TPM3;TCAP;ALDOA
regulation of proteasomal ubiquitin-dependent protein catabolic process (GO:0032434)	3/102	0.209283	0.444342	1.94019	3.03458	SDCBP;VCP;HSPBP1
regulation of protein catabolic process (GO:0042176)	3/102	0.209283	0.444342	1.94019	3.03458	CTSA;NDUFA13;VCP
positive regulation of Wnt signaling pathway (GO:0030177)	4/153	0.212198	0.450023	1.72006	2.66649	USP47;VCP;PSME4;PSMF1
DNA damage response, signal transduction by p53 class mediator resulting in cell cycle arrest (GO:0006977)	2/56	0.214341	0.453034	2.36904	3.64877	PCNA;CNOT7
glycosaminoglycan catabolic process (GO:0006027)	2/56	0.214341	0.453034	2.36904	3.64877	GPC1;GNS
positive regulation of interleukin-1 beta production (GO:0032731)	2/56	0.214341	0.453034	2.36904	3.64877	STAT3;LPL
cellular metal ion homeostasis (GO:0006875)	3/104	0.217319	0.454491	1.90157	2.90254	RYR2;NPTN;ATP2A2
translational elongation (GO:0006414)	3/104	0.217319	0.454491	1.90157	2.90254	GFM1;MTRES1;ERAL1
cellular response to interleukin-1 (GO:0071347)	4/155	0.218679	0.454491	1.6971	2.57985	PSME4;CUL1;PSMF1;MYLK3
regulation of bone mineralization (GO:0030500)	2/57	0.220025	0.454491	2.32585	3.52137	ANKH;ALOX5
cellular response to peptide (GO:1901653)	2/57	0.220025	0.454491	2.32585	3.52137	CDK5;LGMN
regulation of reactive oxygen species metabolic process (GO:2000377)	2/57	0.220025	0.454491	2.32585	3.52137	ALOX5;DHRS4
positive regulation of proteolysis (GO:0045862)	2/57	0.220025	0.454491	2.32585	3.52137	NDUFA13;NRDC
purine ribonucleoside monophosphate biosynthetic process (GO:0009168)	1/16	0.220594	0.454491	4.25887	6.437	ADSL
aromatic amino acid family catabolic process (GO:0009074)	1/16	0.220594	0.454491	4.25887	6.437	QDPR
regulation of ATP biosynthetic process (GO:2001169)	1/16	0.220594	0.454491	4.25887	6.437	VCP
regulation of cholesterol storage (GO:0010885)	1/16	0.220594	0.454491	4.25887	6.437	LPL
regulation of ERBB signaling pathway (GO:1901184)	1/16	0.220594	0.454491	4.25887	6.437	LGMN
regulation of intrinsic apoptotic signaling pathway in response to DNA damage (GO:1902229)	1/16	0.220594	0.454491	4.25887	6.437	TMEM161A
dendrite self-avoidance (GO:0070593)	1/16	0.220594	0.454491	4.25887	6.437	NPTN
glutamine family amino acid catabolic process (GO:0009065)	1/16	0.220594	0.454491	4.25887	6.437	ARG1
histone H2A acetylation (GO:0043968)	1/16	0.220594	0.454491	4.25887	6.437	ACTL6A
response to organophosphorus (GO:0046683)	1/16	0.220594	0.454491	4.25887	6.437	ABCC9
retrograde axonal transport (GO:0008090)	1/16	0.220594	0.454491	4.25887	6.437	DST
serine family amino acid metabolic process (GO:0009069)	1/16	0.220594	0.454491	4.25887	6.437	SHMT1
negative regulation of histone modification (GO:0031057)	1/16	0.220594	0.454491	4.25887	6.437	CTBP1
negative regulation of type I interferon-mediated signaling pathway (GO:0060339)	1/16	0.220594	0.454491	4.25887	6.437	CNOT7
positive regulation of leukocyte adhesion to vascular endothelial cell (GO:1904996)	1/16	0.220594	0.454491	4.25887	6.437	ALOX5
positive regulation of TORC1 signaling (GO:1904263)	1/16	0.220594	0.454491	4.25887	6.437	LARS1
positive regulation of cellular metabolic process (GO:0031325)	3/105	0.221362	0.455573	1.88283	2.83923	SCRIB;APOA4;DHRS4
peptidyl-serine phosphorylation (GO:0018105)	4/156	0.221939	0.456262	1.68585	2.5378	GRK2;CDK5;CAB39;STK38L
mitotic cell cycle phase transition (GO:0044772)	5/209	0.222746	0.457421	1.57113	2.3594	CUL5;CDK4;CUL1;PCNT;NES
receptor metabolic process (GO:0043112)	2/58	0.225721	0.462519	2.2842	3.39993	GRK2;LGMN
regulation of calcium ion transport (GO:0051924)	2/58	0.225721	0.462519	2.2842	3.39993	EPB41;HRC
negative regulation of cellular macromolecule biosynthetic process (GO:2000113)	11/547	0.227538	0.463565	1.31915	1.95292	USP47;NDUFA13;PHC1;CNOT7;EPRS1;QARS1;CDK5;CTBP1;SHMT1;CAPRIN1;ZNF318
selective autophagy (GO:0061912)	2/59	0.231428	0.463565	2.24401	3.28409	DYNC1LI2;PCNT
acyl-CoA biosynthetic process (GO:0071616)	1/17	0.232645	0.463565	3.99249	5.82201	MLYCD
amyloid-beta metabolic process (GO:0050435)	1/17	0.232645	0.463565	3.99249	5.82201	APEH
regulation of cellular respiration (GO:0043457)	1/17	0.232645	0.463565	3.99249	5.82201	VCP
cell communication by electrical coupling involved in cardiac conduction (GO:0086064)	1/17	0.232645	0.463565	3.99249	5.82201	RYR2
cellular modified amino acid catabolic process (GO:0042219)	1/17	0.232645	0.463565	3.99249	5.82201	CHAC2
cellular response to fatty acid (GO:0071398)	1/17	0.232645	0.463565	3.99249	5.82201	LPL
regulation of metal ion transport (GO:0010959)	1/17	0.232645	0.463565	3.99249	5.82201	EPB41
diol biosynthetic process (GO:0034312)	1/17	0.232645	0.463565	3.99249	5.82201	QDPR
regulation of receptor recycling (GO:0001919)	1/17	0.232645	0.463565	3.99249	5.82201	SCRIB
retrograde protein transport, ER to cytosol (GO:0030970)	1/17	0.232645	0.463565	3.99249	5.82201	VCP
reverse cholesterol transport (GO:0043691)	1/17	0.232645	0.463565	3.99249	5.82201	APOA4
ribosomal small subunit assembly (GO:0000028)	1/17	0.232645	0.463565	3.99249	5.82201	ERAL1
tail-anchored membrane protein insertion into ER membrane (GO:0071816)	1/17	0.232645	0.463565	3.99249	5.82201	EMC1
mitochondrial ATP synthesis coupled proton transport (GO:0042776)	1/17	0.232645	0.463565	3.99249	5.82201	ATP5MG
mitochondrial electron transport, cytochrome c to oxygen (GO:0006123)	1/17	0.232645	0.463565	3.99249	5.82201	COX10
muscle tissue morphogenesis (GO:0060415)	1/17	0.232645	0.463565	3.99249	5.82201	TCAP
negative regulation of amyloid-beta formation (GO:1902430)	1/17	0.232645	0.463565	3.99249	5.82201	RTN2
negative regulation of ATP metabolic process (GO:1903579)	1/17	0.232645	0.463565	3.99249	5.82201	PFKFB1
negative regulation of ATPase activity (GO:0032780)	1/17	0.232645	0.463565	3.99249	5.82201	PAM16
negative regulation of fatty acid metabolic process (GO:0045922)	1/17	0.232645	0.463565	3.99249	5.82201	ACADVL
positive regulation of cytokine production involved in inflammatory response (GO:1900017)	1/17	0.232645	0.463565	3.99249	5.82201	STAT3
positive regulation of DNA replication (GO:0045740)	1/17	0.232645	0.463565	3.99249	5.82201	PCNA
positive regulation of macrophage activation (GO:0043032)	1/17	0.232645	0.463565	3.99249	5.82201	KARS1
protein deubiquitination (GO:0016579)	6/267	0.232646	0.463565	1.47415	2.14966	USP47;VCP;USP15;PSME4;ACTL6A;PSMF1
acidic amino acid transport (GO:0015800)	1/18	0.244511	0.475607	3.75745	5.29235	SLC25A22
regulation of establishment or maintenance of cell polarity (GO:0032878)	1/18	0.244511	0.475607	3.75745	5.29235	TEK
regulation of membrane depolarization (GO:0003254)	1/18	0.244511	0.475607	3.75745	5.29235	ABCD1
dendritic cell migration (GO:0036336)	1/18	0.244511	0.475607	3.75745	5.29235	ALOX5
DNA strand elongation involved in DNA replication (GO:0006271)	1/18	0.244511	0.475607	3.75745	5.29235	PCNA
embryonic heart tube development (GO:0035050)	1/18	0.244511	0.475607	3.75745	5.29235	RYR2
endothelial cell proliferation (GO:0001935)	1/18	0.244511	0.475607	3.75745	5.29235	TEK
establishment of vesicle localization (GO:0051650)	1/18	0.244511	0.475607	3.75745	5.29235	CDK5
G protein-coupled acetylcholine receptor signaling pathway (GO:0007213)	1/18	0.244511	0.475607	3.75745	5.29235	GRK2
high-density lipoprotein particle remodeling (GO:0034375)	1/18	0.244511	0.475607	3.75745	5.29235	APOA4
rRNA transcription (GO:0009303)	1/18	0.244511	0.475607	3.75745	5.29235	MARS1
interleukin-6-mediated signaling pathway (GO:0070102)	1/18	0.244511	0.475607	3.75745	5.29235	STAT3
long-chain fatty-acyl-CoA biosynthetic process (GO:0035338)	1/18	0.244511	0.475607	3.75745	5.29235	ACSL1
tRNA metabolic process (GO:0006399)	1/18	0.244511	0.475607	3.75745	5.29235	KARS1
mitochondrial fission (GO:0000266)	1/18	0.244511	0.475607	3.75745	5.29235	MTFP1
ventricular cardiac muscle cell action potential (GO:0086005)	1/18	0.244511	0.475607	3.75745	5.29235	RYR2
negative regulation of biosynthetic process (GO:0009890)	1/18	0.244511	0.475607	3.75745	5.29235	ABCD1
negative regulation of cation transmembrane transport (GO:1904063)	1/18	0.244511	0.475607	3.75745	5.29235	CAB39
nucleotide biosynthetic process (GO:0009165)	1/18	0.244511	0.475607	3.75745	5.29235	ADSL
phosphatidylglycerol acyl-chain remodeling (GO:0036148)	1/18	0.244511	0.475607	3.75745	5.29235	PLA2G4A
positive chemotaxis (GO:0050918)	1/18	0.244511	0.475607	3.75745	5.29235	SCRIB
positive regulation of macrophage derived foam cell differentiation (GO:0010744)	1/18	0.244511	0.475607	3.75745	5.29235	LPL
prostanoid metabolic process (GO:0006692)	1/18	0.244511	0.475607	3.75745	5.29235	GSTM1
cellular divalent inorganic cation homeostasis (GO:0072503)	3/111	0.245908	0.477095	1.77769	2.49374	RYR2;NPTN;ATP2A2
Fc-epsilon receptor signaling pathway (GO:0038095)	3/111	0.245908	0.477095	1.77769	2.49374	PSME4;CUL1;PSMF1
response to retinoic acid (GO:0032526)	2/62	0.248595	0.477095	2.13149	2.96688	NDUFA13;TMEM161A
positive regulation of interleukin-1 production (GO:0032732)	2/62	0.248595	0.477095	2.13149	2.96688	STAT3;LPL
Fc receptor signaling pathway (GO:0038093)	3/112	0.250042	0.477095	1.76129	2.44137	PSME4;CUL1;PSMF1
positive regulation of DNA metabolic process (GO:0051054)	2/63	0.254328	0.477095	2.09644	2.87029	PCNA;TMEM161A
positive regulation of viral process (GO:0048524)	2/63	0.254328	0.477095	2.09644	2.87029	CNOT7;KPNA2
protein modification by small protein removal (GO:0070646)	6/276	0.255577	0.477095	1.42435	1.94314	USP47;VCP;USP15;PSME4;ACTL6A;PSMF1
aspartate family amino acid catabolic process (GO:0009068)	1/19	0.256194	0.477095	3.54852	4.83245	GOT1
aspartate family amino acid metabolic process (GO:0009066)	1/19	0.256194	0.477095	3.54852	4.83245	GOT1
ATP synthesis coupled proton transport (GO:0015986)	1/19	0.256194	0.477095	3.54852	4.83245	ATP5MG
regulation of bicellular tight junction assembly (GO:2000810)	1/19	0.256194	0.477095	3.54852	4.83245	TJP1
regulation of cell-cell adhesion mediated by cadherin (GO:2000047)	1/19	0.256194	0.477095	3.54852	4.83245	TJP1
regulation of exosomal secretion (GO:1903541)	1/19	0.256194	0.477095	3.54852	4.83245	SDCBP
cellular response to interleukin-7 (GO:0098761)	1/19	0.256194	0.477095	3.54852	4.83245	STAT3
regulation of glucose transmembrane transport (GO:0010827)	1/19	0.256194	0.477095	3.54852	4.83245	RTN2
detection of mechanical stimulus (GO:0050982)	1/19	0.256194	0.477095	3.54852	4.83245	TCAP
DNA double-strand break processing (GO:0000729)	1/19	0.256194	0.477095	3.54852	4.83245	UBE2V2
dopamine metabolic process (GO:0042417)	1/19	0.256194	0.477095	3.54852	4.83245	MAOB
regulation of RIG-I signaling pathway (GO:0039535)	1/19	0.256194	0.477095	3.54852	4.83245	USP15
establishment of skin barrier (GO:0061436)	1/19	0.256194	0.477095	3.54852	4.83245	FLG2
establishment or maintenance of apical/basal cell polarity (GO:0035088)	1/19	0.256194	0.477095	3.54852	4.83245	SCRIB
regulation of synaptic vesicle exocytosis (GO:2000300)	1/19	0.256194	0.477095	3.54852	4.83245	PREPL
folic acid metabolic process (GO:0046655)	1/19	0.256194	0.477095	3.54852	4.83245	SHMT1
glycerolipid catabolic process (GO:0046503)	1/19	0.256194	0.477095	3.54852	4.83245	PLA2G4A
regulation of water loss via skin (GO:0033561)	1/19	0.256194	0.477095	3.54852	4.83245	FLG2
heart trabecula morphogenesis (GO:0061384)	1/19	0.256194	0.477095	3.54852	4.83245	TEK
response to fatty acid (GO:0070542)	1/19	0.256194	0.477095	3.54852	4.83245	LPL
histone deubiquitination (GO:0016578)	1/19	0.256194	0.477095	3.54852	4.83245	USP15
interleukin-7-mediated signaling pathway (GO:0038111)	1/19	0.256194	0.477095	3.54852	4.83245	STAT3
maintenance of protein localization in organelle (GO:0072595)	1/19	0.256194	0.477095	3.54852	4.83245	HSPA5
mitochondrion localization (GO:0051646)	1/19	0.256194	0.477095	3.54852	4.83245	TRAK1
myeloid cell activation involved in immune response (GO:0002275)	1/19	0.256194	0.477095	3.54852	4.83245	KARS1
negative regulation of amyloid precursor protein catabolic process (GO:1902992)	1/19	0.256194	0.477095	3.54852	4.83245	RTN2
negative regulation of cytokine production involved in inflammatory response (GO:1900016)	1/19	0.256194	0.477095	3.54852	4.83245	ABCD1
NLS-bearing protein import into nucleus (GO:0006607)	1/19	0.256194	0.477095	3.54852	4.83245	KPNA2
positive regulation of cilium assembly (GO:0045724)	1/19	0.256194	0.477095	3.54852	4.83245	SEPTIN7
positive regulation of focal adhesion assembly (GO:0051894)	1/19	0.256194	0.477095	3.54852	4.83245	TEK
positive regulation of leukocyte activation (GO:0002696)	1/19	0.256194	0.477095	3.54852	4.83245	KARS1
positive regulation of monocyte chemotaxis (GO:0090026)	1/19	0.256194	0.477095	3.54852	4.83245	LGMN
positive regulation of oxidoreductase activity (GO:0051353)	1/19	0.256194	0.477095	3.54852	4.83245	PDP2
positive regulation of triglyceride metabolic process (GO:0090208)	1/19	0.256194	0.477095	3.54852	4.83245	APOA4
protein import into mitochondrial matrix (GO:0030150)	1/19	0.256194	0.477095	3.54852	4.83245	PAM16
response to lipid (GO:0033993)	3/114	0.258339	0.480614	1.72938	2.34068	TMEM161A;STAT3;APOA4
protein secretion (GO:0009306)	2/64	0.260064	0.481439	2.06252	2.77785	CANX;MIA2
regulation of cellular ketone metabolic process (GO:0010565)	2/64	0.260064	0.481439	2.06252	2.77785	PSME4;PSMF1
negative regulation of intrinsic apoptotic signaling pathway (GO:2001243)	2/64	0.260064	0.481439	2.06252	2.77785	NDUFA13;TMEM161A
pre-replicative complex assembly (GO:0036388)	2/64	0.260064	0.481439	2.06252	2.77785	PSME4;PSMF1
protein catabolic process (GO:0030163)	2/64	0.260064	0.481439	2.06252	2.77785	VCP;CTSD
cellular response to lectin (GO:1990858)	3/115	0.262502	0.481803	1.71385	2.29226	PSME4;CUL1;PSMF1
stimulatory C-type lectin receptor signaling pathway (GO:0002223)	3/115	0.262502	0.481803	1.71385	2.29226	PSME4;CUL1;PSMF1
peptidyl-serine modification (GO:0018209)	4/169	0.265358	0.481803	1.55199	2.05899	GRK2;CDK5;CAB39;STK38L
mitotic G1 DNA damage checkpoint signaling (GO:0031571)	2/65	0.265802	0.481803	2.02968	2.68933	PCNA;CNOT7
regulation of protein-containing complex assembly (GO:0043254)	3/116	0.266674	0.481803	1.69859	2.24508	VCP;HSPA5;SAR1B
adaptive immune response based on somatic recombination of immune receptors built from immunoglobulin superfamily domains (GO:0002460)	1/20	0.267697	0.481803	3.36159	4.43024	STAT3
purine ribonucleoside monophosphate metabolic process (GO:0009167)	1/20	0.267697	0.481803	3.36159	4.43024	ADSL
cardiac ventricle development (GO:0003231)	1/20	0.267697	0.481803	3.36159	4.43024	TMEM65
cellular monovalent inorganic cation homeostasis (GO:0030004)	1/20	0.267697	0.481803	3.36159	4.43024	ATP6AP1
cellular response to interferon-beta (GO:0035458)	1/20	0.267697	0.481803	3.36159	4.43024	NDUFA13
cellular response to misfolded protein (GO:0071218)	1/20	0.267697	0.481803	3.36159	4.43024	VCP
early endosome to late endosome transport (GO:0045022)	1/20	0.267697	0.481803	3.36159	4.43024	HOOK1
regulation of programmed necrotic cell death (GO:0062098)	1/20	0.267697	0.481803	3.36159	4.43024	SDCBP
regulation of protein localization to cell periphery (GO:1904375)	1/20	0.267697	0.481803	3.36159	4.43024	CDK5
eye morphogenesis (GO:0048592)	1/20	0.267697	0.481803	3.36159	4.43024	STAT3
fatty acid transport (GO:0015908)	1/20	0.267697	0.481803	3.36159	4.43024	ACSL1
folic acid-containing compound metabolic process (GO:0006760)	1/20	0.267697	0.481803	3.36159	4.43024	SHMT1
granulocyte differentiation (GO:0030851)	1/20	0.267697	0.481803	3.36159	4.43024	CDK4
growth hormone receptor signaling pathway (GO:0060396)	1/20	0.267697	0.481803	3.36159	4.43024	STAT3
skeletal muscle contraction (GO:0003009)	1/20	0.267697	0.481803	3.36159	4.43024	TCAP
mitochondrial cytochrome c oxidase assembly (GO:0033617)	1/20	0.267697	0.481803	3.36159	4.43024	COX20
negative regulation of axon extension involved in axon guidance (GO:0048843)	1/20	0.267697	0.481803	3.36159	4.43024	SEMA4B
nucleobase-containing compound biosynthetic process (GO:0034654)	1/20	0.267697	0.481803	3.36159	4.43024	DGUOK
oligodendrocyte differentiation (GO:0048709)	1/20	0.267697	0.481803	3.36159	4.43024	CDK5
organic cation transport (GO:0015695)	1/20	0.267697	0.481803	3.36159	4.43024	SLC25A42
positive regulation of dendrite morphogenesis (GO:0050775)	1/20	0.267697	0.481803	3.36159	4.43024	CAPRIN1
positive regulation of G2/M transition of mitotic cell cycle (GO:0010971)	1/20	0.267697	0.481803	3.36159	4.43024	CDK4
positive regulation of interferon-alpha production (GO:0032727)	1/20	0.267697	0.481803	3.36159	4.43024	IRF3
post-transcriptional gene silencing by RNA (GO:0035194)	1/20	0.267697	0.481803	3.36159	4.43024	CNOT7
regulation of cellular response to stress (GO:0080135)	3/118	0.27504	0.491732	1.66888	2.15426	ALOX5;CHORDC1;ABCD1
positive regulation of catabolic process (GO:0009896)	2/67	0.277275	0.491732	1.96703	2.5232	NDUFA13;VCP
acetylcholine receptor signaling pathway (GO:0095500)	1/21	0.279022	0.491732	3.19334	4.07619	GRK2
aerobic respiration (GO:0009060)	1/21	0.279022	0.491732	3.19334	4.07619	NDUFS7
androgen metabolic process (GO:0008209)	1/21	0.279022	0.491732	3.19334	4.07619	HSD17B4
calcium ion transport into cytosol (GO:0060402)	1/21	0.279022	0.491732	3.19334	4.07619	RYR2
calcium-mediated signaling using intracellular calcium source (GO:0035584)	1/21	0.279022	0.491732	3.19334	4.07619	RYR2
regulation of cholesterol metabolic process (GO:0090181)	1/21	0.279022	0.491732	3.19334	4.07619	ACADVL
regulation of lipid catabolic process (GO:0050994)	1/21	0.279022	0.491732	3.19334	4.07619	ABCD1
regulation of mitochondrial translation (GO:0070129)	1/21	0.279022	0.491732	3.19334	4.07619	FASTKD2
error-prone translesion synthesis (GO:0042276)	1/21	0.279022	0.491732	3.19334	4.07619	PCNA
heparan sulfate proteoglycan metabolic process (GO:0030201)	1/21	0.279022	0.491732	3.19334	4.07619	GPC1
histone ubiquitination (GO:0016574)	1/21	0.279022	0.491732	3.19334	4.07619	PHC1
innate immune response in mucosa (GO:0002227)	1/21	0.279022	0.491732	3.19334	4.07619	APOA4
long-term synaptic potentiation (GO:0060291)	1/21	0.279022	0.491732	3.19334	4.07619	NPTN
negative regulation of ion transmembrane transporter activity (GO:0032413)	1/21	0.279022	0.491732	3.19334	4.07619	CAB39
negative regulation of response to wounding (GO:1903035)	1/21	0.279022	0.491732	3.19334	4.07619	ALOX5
neuron apoptotic process (GO:0051402)	1/21	0.279022	0.491732	3.19334	4.07619	CDK5
nuclear-transcribed mRNA poly(A) tail shortening (GO:0000289)	1/21	0.279022	0.491732	3.19334	4.07619	CNOT7
positive regulation of glycolytic process (GO:0045821)	1/21	0.279022	0.491732	3.19334	4.07619	PFKFB1
positive regulation of purine nucleotide metabolic process (GO:1900544)	1/21	0.279022	0.491732	3.19334	4.07619	PFKFB1
innate immune response activating cell surface receptor signaling pathway (GO:0002220)	3/119	0.279233	0.491732	1.65441	2.11055	PSME4;CUL1;PSMF1
positive regulation of cysteine-type endopeptidase activity involved in apoptotic process (GO:0043280)	3/119	0.279233	0.491732	1.65441	2.11055	NDUFA13;VCP;CTSD
regulation of tyrosine phosphorylation of STAT protein (GO:0042509)	2/68	0.283007	0.497913	1.93712	2.4452	CNOT7;STAT3
post-translational protein modification (GO:0043687)	7/345	0.285778	0.500215	1.32716	1.66232	CUL5;APLP2;PSME4;HRC;CUL1;PSMF1;KTN1
mitochondrion organization (GO:0007005)	4/175	0.285912	0.500215	1.49708	1.87445	CLUH;MTFP1;TRAK1;NIPSNAP2
RNA 3'-end processing (GO:0031123)	2/69	0.288736	0.500215	1.90811	2.37034	FIP1L1;MTPAP
negative regulation of cellular catabolic process (GO:0031330)	2/69	0.288736	0.500215	1.90811	2.37034	STAT3;EIF4G2
positive regulation of protein transport (GO:0051222)	2/69	0.288736	0.500215	1.90811	2.37034	RIPOR1;PCNT
cellular response to osmotic stress (GO:0071470)	1/22	0.290173	0.500215	3.04113	3.76272	CAB39
regulation of lipid storage (GO:0010883)	1/22	0.290173	0.500215	3.04113	3.76272	LPL
regulation of macrophage chemotaxis (GO:0010758)	1/22	0.290173	0.500215	3.04113	3.76272	DDT
regulation of membrane protein ectodomain proteolysis (GO:0051043)	1/22	0.290173	0.500215	3.04113	3.76272	NRDC
regulation of platelet activation (GO:0010543)	1/22	0.290173	0.500215	3.04113	3.76272	PLA2G4A
rRNA methylation (GO:0031167)	1/22	0.290173	0.500215	3.04113	3.76272	MRM3
lipid droplet organization (GO:0034389)	1/22	0.290173	0.500215	3.04113	3.76272	FITM2
metallo-sulfur cluster assembly (GO:0031163)	1/22	0.290173	0.500215	3.04113	3.76272	CIAPIN1
negative regulation of lipid biosynthetic process (GO:0051055)	1/22	0.290173	0.500215	3.04113	3.76272	ACADVL
negative regulation of small molecule metabolic process (GO:0062014)	1/22	0.290173	0.500215	3.04113	3.76272	BCKDK
phosphatidylserine acyl-chain remodeling (GO:0036150)	1/22	0.290173	0.500215	3.04113	3.76272	PLA2G4A
positive regulation of axon extension (GO:0045773)	1/22	0.290173	0.500215	3.04113	3.76272	GOLGA4
positive regulation of dendritic spine development (GO:0060999)	1/22	0.290173	0.500215	3.04113	3.76272	CAPRIN1
positive regulation of neural precursor cell proliferation (GO:2000179)	1/22	0.290173	0.500215	3.04113	3.76272	NES
positive regulation of signal transduction by p53 class mediator (GO:1901798)	1/22	0.290173	0.500215	3.04113	3.76272	EEF1E1
proteasomal ubiquitin-independent protein catabolic process (GO:0010499)	1/22	0.290173	0.500215	3.04113	3.76272	PSME4
protein localization to cell junction (GO:1902414)	1/22	0.290173	0.500215	3.04113	3.76272	TJP1
regulation of mRNA catabolic process (GO:0061013)	3/122	0.291846	0.502178	1.61246	1.98579	CNOT7;PSME4;PSMF1
epithelium development (GO:0060429)	3/122	0.291846	0.502178	1.61246	1.98579	GSTK1;ACADVL;PCNA
glycerophospholipid biosynthetic process (GO:0046474)	4/177	0.292816	0.503387	1.47962	1.81728	GPAM;ACP6;PLA2G4A;LPIN1
protein ubiquitination (GO:0016567)	10/525	0.294856	0.50643	1.24532	1.52086	NPEPPS;VCP;PHC1;PCNA;CUL5;PSME4;UBE2V2;CUL1;MKRN2;PSMF1
regulation of anatomical structure morphogenesis (GO:0022603)	3/123	0.29606	0.507501	1.59894	1.94622	CDK5;FITM2;LARP4
regulation of cell migration (GO:0030334)	8/408	0.296912	0.507501	1.28179	1.55651	TJP1;PTP4A1;SDCBP;RIPOR1;HSPA5;SEMA4B;STAT3;MEAK7
regulation of hematopoietic stem cell differentiation (GO:1902036)	2/71	0.300177	0.507501	1.85262	2.22941	PSME4;PSMF1
cholesterol homeostasis (GO:0042632)	2/71	0.300177	0.507501	1.85262	2.22941	LPL;APOA4
defense response to symbiont (GO:0140546)	3/124	0.300277	0.507501	1.58564	1.90761	CNOT7;IRF3;ABCC9
regulation of tumor necrosis factor production (GO:0032680)	3/124	0.300277	0.507501	1.58564	1.90761	DDT;STAT3;LPL
regulation of calcium ion transmembrane transport (GO:1903169)	1/23	0.301152	0.507501	2.90274	3.4837	HRC
regulation of interferon-gamma-mediated signaling pathway (GO:0060334)	1/23	0.301152	0.507501	2.90274	3.4837	ARG1
cytoskeleton-dependent intracellular transport (GO:0030705)	1/23	0.301152	0.507501	2.90274	3.4837	HOOK1
regulation of necroptotic process (GO:0060544)	1/23	0.301152	0.507501	2.90274	3.4837	SDCBP
regulation of neural precursor cell proliferation (GO:2000177)	1/23	0.301152	0.507501	2.90274	3.4837	NES
ERK1 and ERK2 cascade (GO:0070371)	1/23	0.301152	0.507501	2.90274	3.4837	KARS1
regulation of steroid metabolic process (GO:0019218)	1/23	0.301152	0.507501	2.90274	3.4837	ACADVL
response to nutrient levels (GO:0031667)	1/23	0.301152	0.507501	2.90274	3.4837	MEAK7
triglyceride catabolic process (GO:0019433)	1/23	0.301152	0.507501	2.90274	3.4837	LPL
negative regulation of G protein-coupled receptor signaling pathway (GO:0045744)	1/23	0.301152	0.507501	2.90274	3.4837	GRK2
negative regulation of reactive oxygen species metabolic process (GO:2000378)	1/23	0.301152	0.507501	2.90274	3.4837	ABCD1
negative regulation of smoothened signaling pathway (GO:0045879)	1/23	0.301152	0.507501	2.90274	3.4837	VCP
positive regulation of cell cycle G2/M phase transition (GO:1902751)	1/23	0.301152	0.507501	2.90274	3.4837	CDK4
positive regulation of transcription by RNA polymerase I (GO:0045943)	1/23	0.301152	0.507501	2.90274	3.4837	MARS1
protein alkylation (GO:0008213)	1/23	0.301152	0.507501	2.90274	3.4837	FAM98A
regulated exocytosis (GO:0045055)	4/180	0.303213	0.51006	1.45417	1.73529	ABCC4;CDK5;APLP2;ALDOA
positive regulation of cellular biosynthetic process (GO:0031328)	4/180	0.303213	0.51006	1.45417	1.73529	PCNA;APOA4;LARP4B;LARP4
protein targeting (GO:0006605)	3/125	0.304498	0.510161	1.57257	1.86992	SDCBP;SRPRA;TRAK1
platelet degranulation (GO:0002576)	3/125	0.304498	0.510161	1.57257	1.86992	ABCC4;APLP2;ALDOA
negative regulation of epithelial cell proliferation (GO:0050680)	2/72	0.305886	0.510161	1.82606	2.16304	AIMP1;ALOX5
positive regulation of neurogenesis (GO:0050769)	2/72	0.305886	0.510161	1.82606	2.16304	CAPRIN1;NPTN
positive regulation of secretion by cell (GO:1903532)	2/72	0.305886	0.510161	1.82606	2.16304	GRK2;ATP6AP1
antigen processing and presentation of exogenous peptide antigen via MHC class I, TAP-dependent (GO:0002479)	2/73	0.311587	0.510161	1.80025	2.09923	PSME4;PSMF1
insulin receptor signaling pathway (GO:0008286)	2/73	0.311587	0.510161	1.80025	2.09923	ATP6AP1;NAMPT
ubiquitin-dependent ERAD pathway (GO:0030433)	2/73	0.311587	0.510161	1.80025	2.09923	VCP;HSPA5
positive regulation of synaptic transmission (GO:0050806)	2/73	0.311587	0.510161	1.80025	2.09923	NPTN;LGMN
regulation of axon extension involved in axon guidance (GO:0048841)	1/24	0.311961	0.510161	2.7764	3.23416	SEMA4B
axon extension (GO:0048675)	1/24	0.311961	0.510161	2.7764	3.23416	CDK5
regulation of cardiac muscle hypertrophy (GO:0010611)	1/24	0.311961	0.510161	2.7764	3.23416	GLRX3
C21-steroid hormone metabolic process (GO:0008207)	1/24	0.311961	0.510161	2.7764	3.23416	AKR1B1
regulation of cell size (GO:0008361)	1/24	0.311961	0.510161	2.7764	3.23416	LARS1
cardiac muscle cell differentiation (GO:0055007)	1/24	0.311961	0.510161	2.7764	3.23416	TCAP
cellular response to catecholamine stimulus (GO:0071870)	1/24	0.311961	0.510161	2.7764	3.23416	RYR2
cholesterol efflux (GO:0033344)	1/24	0.311961	0.510161	2.7764	3.23416	APOA4
regulation of keratinocyte proliferation (GO:0010837)	1/24	0.311961	0.510161	2.7764	3.23416	TGM1
regulation of ruffle assembly (GO:1900027)	1/24	0.311961	0.510161	2.7764	3.23416	FAM98A
long-chain fatty-acyl-CoA metabolic process (GO:0035336)	1/24	0.311961	0.510161	2.7764	3.23416	ACSL1
sulfur amino acid metabolic process (GO:0000096)	1/24	0.311961	0.510161	2.7764	3.23416	MMUT
negative regulation of stress fiber assembly (GO:0051497)	1/24	0.311961	0.510161	2.7764	3.23416	TJP1
nucleotide-excision repair, DNA gap filling (GO:0006297)	1/24	0.311961	0.510161	2.7764	3.23416	PCNA
positive regulation of carbohydrate metabolic process (GO:0045913)	1/24	0.311961	0.510161	2.7764	3.23416	PFKFB1
positive regulation of cell-substrate junction organization (GO:0150117)	1/24	0.311961	0.510161	2.7764	3.23416	TEK
positive regulation of cellular response to transforming growth factor beta stimulus (GO:1903846)	1/24	0.311961	0.510161	2.7764	3.23416	SDCBP
positive regulation of neuron apoptotic process (GO:0043525)	1/24	0.311961	0.510161	2.7764	3.23416	CDK5
positive regulation of transcription from RNA polymerase II promoter in response to stress (GO:0036003)	1/24	0.311961	0.510161	2.7764	3.23416	HSPA5
positive regulation of transforming growth factor beta receptor signaling pathway (GO:0030511)	1/24	0.311961	0.510161	2.7764	3.23416	SDCBP
positive regulation of viral life cycle (GO:1903902)	1/24	0.311961	0.510161	2.7764	3.23416	KPNA2
protein exit from endoplasmic reticulum (GO:0032527)	1/24	0.311961	0.510161	2.7764	3.23416	VCP
protein insertion into mitochondrial membrane (GO:0051204)	1/24	0.311961	0.510161	2.7764	3.23416	NDUFA13
DNA repair (GO:0006281)	6/298	0.313867	0.512832	1.31554	1.52443	USP47;VCP;PCNA;PSME4;UBE2V2;KPNA2
proteolysis involved in cellular protein catabolic process (GO:0051603)	2/74	0.317278	0.516265	1.77515	2.03784	VCP;LGMN
cellular response to amino acid starvation (GO:0034198)	2/74	0.317278	0.516265	1.77515	2.03784	LARS1;KPTN
DNA damage response, signal transduction by p53 class mediator (GO:0030330)	2/74	0.317278	0.516265	1.77515	2.03784	PCNA;CNOT7
negative regulation of protein binding (GO:0032091)	2/74	0.317278	0.516265	1.77515	2.03784	ATP2A2;NES
cellular protein metabolic process (GO:0044267)	8/417	0.317342	0.516265	1.253	1.43817	TGM1;APLP2;HRC;MRRF;RPL3L;DARS1;LGMN;KTN1
endoplasmic reticulum to Golgi vesicle-mediated transport (GO:0006888)	4/185	0.320627	0.518222	1.41364	1.60798	DYNC1LI2;SAR1B;MIA2;ANK1
protein quality control for misfolded or incompletely synthesized proteins (GO:0006515)	1/25	0.322604	0.518222	2.66058	3.00999	VCP
receptor catabolic process (GO:0032801)	1/25	0.322604	0.518222	2.66058	3.00999	LGMN
receptor signaling pathway via STAT (GO:0097696)	1/25	0.322604	0.518222	2.66058	3.00999	STAT3
regulation of cholesterol transport (GO:0032374)	1/25	0.322604	0.518222	2.66058	3.00999	APOA4
regulation of interferon-alpha production (GO:0032647)	1/25	0.322604	0.518222	2.66058	3.00999	IRF3
endosome transport via multivesicular body sorting pathway (GO:0032509)	1/25	0.322604	0.518222	2.66058	3.00999	VCP
fat-soluble vitamin metabolic process (GO:0006775)	1/25	0.322604	0.518222	2.66058	3.00999	LGMN
negative regulation of cellular carbohydrate metabolic process (GO:0010677)	1/25	0.322604	0.518222	2.66058	3.00999	PFKFB1
negative regulation of response to endoplasmic reticulum stress (GO:1903573)	1/25	0.322604	0.518222	2.66058	3.00999	ALOX5
peripheral nervous system development (GO:0007422)	1/25	0.322604	0.518222	2.66058	3.00999	GPC1
positive regulation of lipid metabolic process (GO:0045834)	1/25	0.322604	0.518222	2.66058	3.00999	APOA4
positive regulation of peptidyl-threonine phosphorylation (GO:0010800)	1/25	0.322604	0.518222	2.66058	3.00999	CAB39
regulation of hematopoietic progenitor cell differentiation (GO:1901532)	2/75	0.322958	0.518222	1.75075	1.97875	PSME4;PSMF1
regulation of transcription from RNA polymerase II promoter in response to hypoxia (GO:0061418)	2/75	0.322958	0.518222	1.75075	1.97875	PSME4;PSMF1
response to amino acid starvation (GO:1990928)	2/75	0.322958	0.518222	1.75075	1.97875	LARS1;KPTN
G2/M transition of mitotic cell cycle (GO:0000086)	3/130	0.325629	0.522062	1.51027	1.69452	CUL1;PCNT;NES
regulation of epithelial to mesenchymal transition (GO:0010717)	2/76	0.328626	0.525075	1.727	1.92187	SDCBP;SDHAF2
establishment of protein localization to organelle (GO:0072594)	2/76	0.328626	0.525075	1.727	1.92187	RYR2;STAT3
positive regulation of interleukin-6 production (GO:0032755)	2/76	0.328626	0.525075	1.727	1.92187	STAT3;LPL
protein import into nucleus (GO:0006606)	2/76	0.328626	0.525075	1.727	1.92187	STAT3;KPNA2
cell cycle G2/M phase transition (GO:0044839)	3/131	0.329857	0.525494	1.49839	1.66186	CUL1;PCNT;NES
cellular response to hypoxia (GO:0071456)	3/131	0.329857	0.525494	1.49839	1.66186	NPEPPS;PSME4;PSMF1
cellular response to metal ion (GO:0071248)	3/131	0.329857	0.525494	1.49839	1.66186	RYR1;RYR3;LGMN
regulation of mitotic cell cycle phase transition (GO:1901990)	4/188	0.331113	0.525494	1.39038	1.53678	PSME4;CUL1;PSMF1;PCNT
regulation of actin filament bundle assembly (GO:0032231)	1/26	0.333083	0.525494	2.55403	2.8078	SYNPO2
regulation of biomineral tissue development (GO:0070167)	1/26	0.333083	0.525494	2.55403	2.8078	ANKH
chaperone cofactor-dependent protein refolding (GO:0051085)	1/26	0.333083	0.525494	2.55403	2.8078	HSPA5
clathrin-dependent endocytosis (GO:0072583)	1/26	0.333083	0.525494	2.55403	2.8078	CANX
regulation of monocyte chemotaxis (GO:0090025)	1/26	0.333083	0.525494	2.55403	2.8078	LGMN
regulation of potassium ion transmembrane transporter activity (GO:1901016)	1/26	0.333083	0.525494	2.55403	2.8078	CAB39
regulation of viral life cycle (GO:1903900)	1/26	0.333083	0.525494	2.55403	2.8078	KPNA2
hippo signaling (GO:0035329)	1/26	0.333083	0.525494	2.55403	2.8078	TJP1
TOR signaling (GO:0031929)	1/26	0.333083	0.525494	2.55403	2.8078	MEAK7
negative regulation of intrinsic apoptotic signaling pathway in response to DNA damage (GO:1902230)	1/26	0.333083	0.525494	2.55403	2.8078	TMEM161A
negative regulation of receptor-mediated endocytosis (GO:0048261)	1/26	0.333083	0.525494	2.55403	2.8078	SDCBP
purine ribonucleotide metabolic process (GO:0009150)	2/77	0.334281	0.526499	1.70389	1.86708	ACOT1;MLYCD
positive regulation of type I interferon production (GO:0032481)	2/77	0.334281	0.526499	1.70389	1.86708	IRF3;NFKB2
defense response to virus (GO:0051607)	3/133	0.338311	0.531507	1.47519	1.59879	CNOT7;IRF3;ABCC9
antigen processing and presentation of exogenous peptide antigen via MHC class I (GO:0042590)	2/78	0.339922	0.531507	1.68138	1.81428	PSME4;PSMF1
negative regulation of apoptotic signaling pathway (GO:2001234)	2/78	0.339922	0.531507	1.68138	1.81428	NDUFA13;QARS1
negative regulation of blood vessel morphogenesis (GO:2000181)	2/78	0.339922	0.531507	1.68138	1.81428	ALOX5;TEK
regulation of cell junction assembly (GO:1901888)	1/27	0.3434	0.531507	2.45567	2.62476	TJP1
camera-type eye development (GO:0043010)	1/27	0.3434	0.531507	2.45567	2.62476	NES
cellular response to unfolded protein (GO:0034620)	1/27	0.3434	0.531507	2.45567	2.62476	HSPA5
dendritic spine organization (GO:0097061)	1/27	0.3434	0.531507	2.45567	2.62476	LGMN
response to glucocorticoid (GO:0051384)	1/27	0.3434	0.531507	2.45567	2.62476	GOT1
L-alpha-amino acid transmembrane transport (GO:1902475)	1/27	0.3434	0.531507	2.45567	2.62476	SLC25A22
stress-activated protein kinase signaling cascade (GO:0031098)	1/27	0.3434	0.531507	2.45567	2.62476	CUL1
negative regulation of actin filament bundle assembly (GO:0032232)	1/27	0.3434	0.531507	2.45567	2.62476	TJP1
negative regulation of catalytic activity (GO:0043086)	1/27	0.3434	0.531507	2.45567	2.62476	NES
negative regulation of cation channel activity (GO:2001258)	1/27	0.3434	0.531507	2.45567	2.62476	GSTM2
negative regulation of endothelial cell apoptotic process (GO:2000352)	1/27	0.3434	0.531507	2.45567	2.62476	TEK
nucleobase-containing small molecule interconversion (GO:0015949)	1/27	0.3434	0.531507	2.45567	2.62476	DUT
positive regulation of cellular component movement (GO:0051272)	1/27	0.3434	0.531507	2.45567	2.62476	CCDC25
positive regulation of erythrocyte differentiation (GO:0045648)	1/27	0.3434	0.531507	2.45567	2.62476	STAT3
positive regulation of gene silencing by miRNA (GO:2000637)	1/27	0.3434	0.531507	2.45567	2.62476	STAT3
positive regulation of mitotic cell cycle (GO:0045931)	1/27	0.3434	0.531507	2.45567	2.62476	LGMN
positive regulation of striated muscle cell differentiation (GO:0051155)	1/27	0.3434	0.531507	2.45567	2.62476	MYLK3
positive regulation of proteasomal ubiquitin-dependent protein catabolic process (GO:0032436)	2/79	0.345548	0.533952	1.65946	1.76338	VCP;HSPBP1
positive regulation of ubiquitin-dependent protein catabolic process (GO:2000060)	2/79	0.345548	0.533952	1.65946	1.76338	VCP;HSPBP1
organic substance transport (GO:0071702)	3/136	0.350979	0.535324	1.44169	1.50949	ABCD3;APOA4;ABCD1
regulation of fat cell differentiation (GO:0045598)	2/80	0.351159	0.535324	1.6381	1.7143	ALOX5;LPL
regulation of organelle organization (GO:0033043)	2/80	0.351159	0.535324	1.6381	1.7143	TJP1;SAR1B
negative regulation of cell cycle (GO:0045786)	2/80	0.351159	0.535324	1.6381	1.7143	SCRIB;NUDT6
negative regulation of cellular component organization (GO:0051129)	2/80	0.351159	0.535324	1.6381	1.7143	HSPA5;APOA4
regulation of canonical Wnt signaling pathway (GO:0060828)	5/253	0.353081	0.535324	1.28946	1.3424	USP47;VCP;SDHAF2;PSME4;PSMF1
receptor clustering (GO:0043113)	1/28	0.353559	0.535324	2.3646	2.45849	SCRIB
bile acid and bile salt transport (GO:0015721)	1/28	0.353559	0.535324	2.3646	2.45849	ABCC4
calcium ion import (GO:0070509)	1/28	0.353559	0.535324	2.3646	2.45849	ATP2A2
regulation of DNA damage response, signal transduction by p53 class mediator (GO:0043516)	1/28	0.353559	0.535324	2.3646	2.45849	EEF1E1
cellular response to acid chemical (GO:0071229)	1/28	0.353559	0.535324	2.3646	2.45849	LARS1
cellular response to epidermal growth factor stimulus (GO:0071364)	1/28	0.353559	0.535324	2.3646	2.45849	MARS1
cellular response to interleukin-6 (GO:0071354)	1/28	0.353559	0.535324	2.3646	2.45849	STAT3
[truncated: 650 more rows]

## Sheet: GO_upregulated proteins
Term	Overlap	P-value	Adjusted P-value	Odds Ratio	Combined Score	Genes
[truncated: 2,990 more rows]

[truncated: 3 more sheets: Downregulated protein with PP, RNA & protein overlaps, GO_down protein with PP]
